# Supplementary material for: Rhodium(iii)-catalyzed annulation of 3-arylquinazolinones with alkynes via double C–H activation: an efficient route for quinolino[2,1-b]quinazolinones
Source: Royal Society of Chemistry journal article supplement (doi:10.1039/d1qo01186c), 2021-01-01

## Supporting Information

### **Rhodium(III)-Catalyzed Annulation of 3-Arylquinazolinones with Alkynes via Double C–H Activation: An Efficient Route for Quinolino[2,1-*b*]quinazolinones**

Jian Huang, Wei Chen, Jiazhi Liang, Qin Yang, Zhihong Deng, Zhibin Song and Yiyuan Peng\*

*Key Laboratory for Green Chemistry of Jiangxi Province, Key Laboratory of Functional Small Molecules for Ministry of Education, Jiangxi Normal University, 99 Ziyang Avenue, Nanchang 330022, China.*

*yypeng@jxnu.edu.cn*

### Table of Contents

|                                                                 |            |
|-----------------------------------------------------------------|------------|
| <b>I. General information.....</b>                              | <b>S2</b>  |
| <b>II. General procedure.....</b>                               | <b>S2</b>  |
| <b>III. Analytical data of the synthesized derivatives.....</b> | <b>S3</b>  |
| <b>IV. Mechanistic study.....</b>                               | <b>S12</b> |
| <b>V. X-ray crystallography date of 3ba .....</b>               | <b>S15</b> |
| <b>VI. References.....</b>                                      | <b>S17</b> |
| <b>VII. Copy of NMR.....</b>                                    | <b>S18</b> |
| <b>VIII. UV-Vis and emission spectrum .....</b>                 | <b>S95</b> |

## I. General information

All reactions were carried out under Ar with no precaution in dried glassware unless otherwise noted. All materials were obtained from commercial suppliers and used without further purification. Silica gel-G plates (Merck) were used for TLC analysis with a mixture of hexane and ethyl acetate as the eluent. Column chromatography was performed with silica gel (200-300 mesh). Melting point of the products was measured on Büchi melting point apparatus, MPB-540. Open capillary tubes were used for the measurements and are uncorrected.  $^1\text{H}$  NMR and  $^{13}\text{C}$  NMR spectra were recorded on a Bruker Model Avance DMX 400 Spectrometer ( $^1\text{H}$  400 MHz and  $^{13}\text{C}$  100 MHz, respectively). Chemical shifts ( $\delta$ ) are given in ppm and are referenced to residual solvent peaks. High resolution mass spectrometry (HRMS) spectra were obtained on a Waters Xevo G2-XS Qtof Instrument. X-Ray single-crystal diffraction data were collected on an Agilent Technologies Gemini single-crystal diffractometer. UV-vis spectra were recorded on Agilent spectrophotometer. Fluorescence spectra and absolute quantum yields were collected on a Horiba JobinYvon-Edison Fluoromax-Plus fluorescence spectrometer with a calibrated integrating sphere system. Quinazolinone<sup>1</sup> and alkyne<sup>2</sup> were prepared according to literatures.

## II. General procedure for the synthesis of products 3

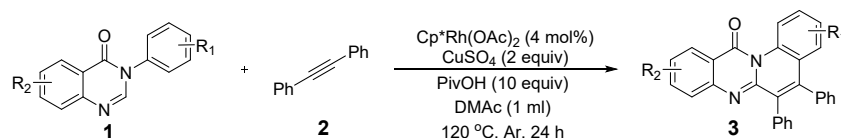

An oven-dried 10 ml schlenk tube with a magnetic stir bar was charged with quinazolinone **1** (0.2 mmol), alkynes **2** (0.3 mmol),  $\text{Cp}^*\text{Rh}(\text{OAc})_2$  (4 mol%),  $\text{CuSO}_4$  (2 equiv),  $\text{PivOH}$  (10 equiv) and  $\text{DMAc}$  (1 ml) under Ar. The tube was sealed with a teflon-coated cap and reaction solution was heated at  $120\text{ }^\circ\text{C}$  for 24 h. The reaction was then quenched with saturated  $\text{NaHCO}_3$  solution (10 ml) and extracted with  $\text{EtOAc}$  (3 X 10 ml), washed with brine and dried over anhydrous  $\text{Na}_2\text{SO}_4$ . The filtrate was concentrated and the residue was purified by column chromatography on silica gel to provide the desired product **3**.

### Gram-scale synthesis of 3aa

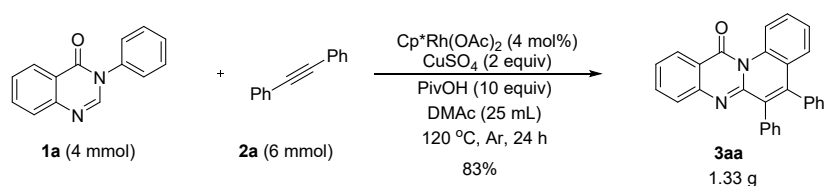

An oven-dried 100 ml schlenk flask with a magnetic stir bar was charged with quinazolinone **1** (4 mmol), alkynes **2** (6 mmol),  $\text{Cp}^*\text{Rh}(\text{OAc})_2$  (4 mol%),  $\text{CuSO}_4$  (2 equiv),  $\text{PivOH}$  (10 equiv) and  $\text{DMAc}$  (25 ml) under Ar. The flask was sealed with a rubber stopper and reaction solution was heated at  $120\text{ }^\circ\text{C}$  for 24 h. The reaction was then quenched with saturated  $\text{NaHCO}_3$  solution (100 ml) and extracted with  $\text{EtOAc}$  (3 X 50 ml), washed with brine and dried over anhydrous  $\text{Na}_2\text{SO}_4$ . The filtrate was concentrated and the residue was purified by column chromatography on silica gel to provide the product **3aa** in 83% yield.

### General procedure for the synthesis of products [D<sub>5</sub>]-1a

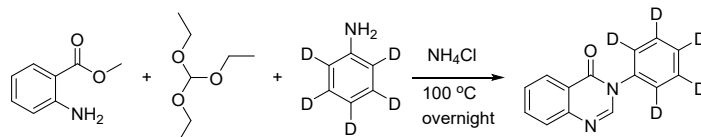

A mixture of methyl 2-aminobenzoate (1.0 mmol), aniline D<sub>5</sub> (1.2 mmol), triethoxymethane (1.5 mmol), and NH<sub>4</sub>Cl (0.4 mmol) was heated with stirring at 100 °C for 12h. After cooling, H<sub>2</sub>O was added and the product was extracted with EtOAc. Then washed with brine and dried over anhydrous Na<sub>2</sub>SO<sub>4</sub>. The filtrate was concentrated and the residue was purified by column chromatography on silica gel to provide the desired product in 83% yield.

### III. Analytical data of the synthesized derivatives

#### 5,6-Diphenyl-12*H*-quinolino[2,1-*b*]quinazolin-12-one (3aa)

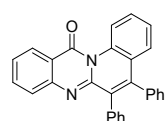

Yellow solid; 79 mg, yield 99%; mp 253-255 °C; <sup>1</sup>H NMR (400 MHz, CDCl<sub>3</sub>) δ 9.41 (d, *J* = 8.8 Hz, 1H), 8.43 (d, *J* = 8.0 Hz, 1H), 7.68 (dt, *J* = 8.0, 1.2 Hz, 1H), 7.59-7.52 (m, 2H), 7.45 (t, *J* = 7.6 Hz, 1H), 7.31-7.10 (m, 12H); <sup>13</sup>C NMR (100 MHz, CDCl<sub>3</sub>) δ 163.4, 147.6, 146.5, 144.7, 136.7, 136.5, 134.8, 134.2, 131.1, 130.0, 128.7, 128.0, 127.6, 127.6, 127.5, 127.3, 127.2, 126.8, 126.1, 126.0, 125.6, 121.4, 119.7; IR (KBr): 2956, 2925, 2854, 1678, 1543, 1465, 1377, 789, 756, 690 cm<sup>-1</sup>; HRMS (ESI): *m/z* [M+H]<sup>+</sup> calcd for C<sub>28</sub>H<sub>19</sub>N<sub>2</sub>O: 399.1492, found: 399.1495.

#### 3-Methyl-5,6-diphenyl-12*H*-quinolino[2,1-*b*]quinazolin-12-one (3ba)

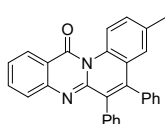

Yellow solid; 80mg, yield 97%; mp 253-256 °C; <sup>1</sup>H NMR (400 MHz, CDCl<sub>3</sub>) δ 9.35 (d, *J* = 8.8 Hz, 1H), 8.43 (d, *J* = 8.0 Hz, 1H), 7.68 (ddd, *J* = 8.4, 7.2, 1.2 Hz, 1H), 7.55 (d, *J* = 8.4 Hz, 1H), 7.45 (ddd, *J* = 8.0, 7.2, 0.8 Hz, 1H), 7.39 (dd, *J* = 8.8, 1.2 Hz, 1H), 7.28-7.25 (m, 3H), 7.21-7.10 (m, 7H), 7.08 (s, 1H), 2.32 (s, 3H); <sup>13</sup>C NMR (100 MHz, CDCl<sub>3</sub>) δ 163.3, 147.6, 146.5, 144.7, 136.8, 136.6, 135.8, 134.7, 134.1, 132.7, 131.1, 130.0, 129.7, 128.0, 127.5, 127.5, 127.4, 127.3, 127.1, 126.7, 126.0, 125.5, 121.3, 119.7, 21.1; IR (KBr): 2924, 1670, 1595, 1531, 1466, 1339, 1020, 814, 773, 694 cm<sup>-1</sup>; HRMS (ESI): *m/z* [M+H]<sup>+</sup> calcd for C<sub>29</sub>H<sub>21</sub>N<sub>2</sub>O: 413.1648, found: 413.1656.

#### 3-Methoxy-5,6-diphenyl-12*H*-quinolino[2,1-*b*]quinazolin-12-one (3ca)

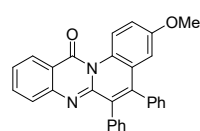

Yellow solid; 79 mg, yield 92%; mp 240-244 °C; <sup>1</sup>H NMR (400 MHz, CDCl<sub>3</sub>) δ 9.47 (d, *J* = 9.6 Hz, 1H), 8.44 (d, *J* = 8.0 Hz, 1H), 7.69 (ddd, *J* = 8.0, 7.2, 0.8 Hz, 1H), 7.55 (d, *J* = 8.0 Hz, 1H), 7.45 (t, *J* = 7.6 Hz, 1H), 7.27-7.24 (m, 3H), 7.22-7.10 (m, 8H), 6.77 (d, *J* = 3.2 Hz, 1H), 3.72 (s, 3H); <sup>13</sup>C NMR (100 MHz, CDCl<sub>3</sub>) δ 163.2, 156.9, 147.4, 146.4, 144.4, 136.8, 136.5, 135.3, 134.0, 131.0, 129.9, 128.8, 128.1, 127.6, 127.5, 127.3, 127.2, 127.1, 126.7, 126.0, 123.0, 119.6, 114.9, 111.3, 55.4; IR (KBr): 2957, 2854, 1666, 1537, 1462, 1377, 1026, 818, 768, 694 cm<sup>-1</sup>; HRMS (ESI): *m/z* [M+H]<sup>+</sup> calcd for C<sub>29</sub>H<sub>21</sub>N<sub>2</sub>O<sub>2</sub>: 429.1598, found: 429.1589.

#### 3-(*tert*-Butyl)-5,6-diphenyl-12*H*-quinolino[2,1-*b*]quinazolin-12-one (3da)

Yellow solid; 85 mg, yield 94%; mp 242-245 °C; <sup>1</sup>H NMR (400 MHz, CDCl<sub>3</sub>) δ 9.39 (d, *J* =

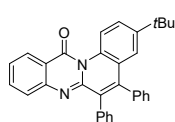

9.2 Hz, 1H), 8.44 (d,  $J = 8.0$  Hz, 1H), 7.67 (ddd,  $J = 8.0, 7.2, 0.8$  Hz, 1H), 7.62 (dd,  $J = 8.8, 2.0$  Hz, 1H), 7.54 (d,  $J = 8.4$  Hz, 1H), 7.43 (t,  $J = 7.6$  Hz, 1H), 7.31-7.12 (m, 11H), 1.23 (s, 9H);  $^{13}\text{C}$  NMR (100 MHz,  $\text{CDCl}_3$ )  $\delta$  163.3, 148.9, 147.7, 146.5, 145.1, 136.9, 136.6, 134.5, 134.1, 132.6, 131.1, 130.0, 127.9, 127.6, 127.5, 127.3, 127.1, 126.7, 126.2, 125.9, 125.3, 124.1, 121.1, 119.7, 34.6, 31.1; IR (KBr): 2955, 1680, 1537, 1468, 1258, 829, 768, 696  $\text{cm}^{-1}$ ; HRMS (ESI):  $m/z$   $[\text{M}+\text{H}]^+$  calcd for  $\text{C}_{32}\text{H}_{27}\text{N}_2\text{O}$ : 455.2118, found: 455.2123.

### 2-Fluoro-5,6-diphenyl-12H-quinolino[2,1-b]quinazolin-12-one (3ea)

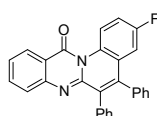

Yellow solid; 75 mg, yield 90%; mp 272-274  $^\circ\text{C}$ ;  $^1\text{H}$  NMR (400 MHz,  $\text{CDCl}_3$ )  $\delta$  9.50 (dd,  $J = 9.6, 5.2$  Hz, 1H), 8.42 (d,  $J = 8.0$  Hz, 1H), 7.69 (t,  $J = 7.2$  Hz, 1H), 7.55 (d,  $J = 8.0$  Hz, 1H), 7.45 (t,  $J = 7.6$  Hz, 1H), 7.30-7.10 (m, 11H), 6.97 (dd,  $J = 9.6, 2.8$  Hz, 1H);  $^{13}\text{C}$  NMR (100 MHz,  $\text{CDCl}_3$ )  $\delta$  163.2, 159.7 (d,  $^1J = 246.8$  Hz), 147.2, 146.3, 143.8 (d,  $^4J = 2.5$  Hz), 136.4, 136.1, 136.0, 134.3, 131.1 (d,  $^4J = 2.0$  Hz), 130.9, 129.9, 128.3, 127.9, 127.8 (d,  $^3J = 8.0$  Hz), 127.6, 127.3, 127.1, 126.9, 126.3, 123.6 (d,  $^3J = 7.8$  Hz), 119.6, 115.8 (d,  $^2J = 22.6$  Hz), 113.1 (d,  $^2J = 24.3$  Hz); IR (KBr): 3055, 1676, 1610, 1545, 1469, 1279, 816, 764, 692  $\text{cm}^{-1}$ ; HRMS (ESI):  $m/z$   $[\text{M}+\text{H}]^+$  calcd for  $\text{C}_{28}\text{H}_{18}\text{FN}_2\text{O}$ : 417.1398, found: 417.1389.

### 3-Chloro-5,6-diphenyl-12H-quinolino[2,1-b]quinazolin-12-one (3fa)

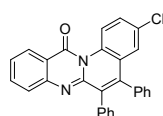

Yellow solid; 60 mg, yield 70%; mp 254-256  $^\circ\text{C}$ ;  $^1\text{H}$  NMR (400 MHz,  $\text{CDCl}_3$ )  $\delta$  9.44 (d,  $J = 9.6$  Hz, 1H), 8.42 (dd,  $J = 8.0, 0.4$  Hz, 1H), 7.70 (ddd,  $J = 8.0, 6.8, 1.2$  Hz, 1H), 7.55 (d,  $J = 8.0$  Hz, 1H), 7.51 (dd,  $J = 9.6, 2.4$  Hz, 1H), 7.47 (t,  $J = 7.6$  Hz, 1H), 7.30-7.25 (m, 4H), 7.23-7.16 (m, 3H), 7.16-7.09 (m, 4H);  $^{13}\text{C}$  NMR (100 MHz,  $\text{CDCl}_3$ )  $\delta$  163.2, 147.2, 146.3, 143.6, 136.3, 136.1, 135.8, 134.4, 133.2, 131.5, 130.9, 129.9, 128.5, 128.3, 127.9, 127.6, 127.3, 127.3, 127.1, 126.9, 126.8, 126.4, 122.9, 119.6; IR (KBr): 2924, 1680, 1537, 1468, 1342, 1207, 953, 820, 766, 692  $\text{cm}^{-1}$ ; HRMS (ESI):  $m/z$   $[\text{M}+\text{H}]^+$  calcd for  $\text{C}_{28}\text{H}_{18}\text{ClN}_2\text{O}$ : 433.1102, found: 433.1111.

### 5,6-Diphenyl-3-(trifluoromethyl)-12H-quinolino[2,1-b]quinazolin-12-one (3ga)

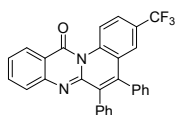

Yellow solid; 92 mg, yield 99%; mp 182-186  $^\circ\text{C}$ ;  $^1\text{H}$  NMR (400 MHz,  $\text{CDCl}_3$ )  $\delta$  9.55 (d,  $J = 9.2$  Hz, 1H), 8.42 (d,  $J = 8.0$  Hz, 1H), 7.78 (d,  $J = 8.8$  Hz, 1H), 7.71 (t,  $J = 7.6$  Hz, 1H), 7.58-7.53 (m, 2H), 7.47 (t,  $J = 7.6$  Hz, 1H), 7.33-7.26 (m, 3H), 7.24-7.18 (m, 3H), 7.17-7.10 (m, 4H);  $^{13}\text{C}$  NMR (100 MHz,  $\text{CDCl}_3$ )  $\delta$  163.3, 147.2, 146.3, 143.7, 136.9, 136.3, 136.1, 135.5, 134.6, 130.9, 129.9, 128.4, 128.1, 127.9 (q,  $^2J = 33.4$  Hz), 127.7, 127.4, 127.2, 127.0, 126.6, 125.8, 125.0 (q,  $^3J = 3.3$  Hz), 124.4 (q,  $^3J = 3.9$  Hz), 123.6 (q,  $^1J = 272.1$  Hz), 121.9, 119.7; IR (KBr): 2926, 1682, 1545, 1468, 1331, 1182, 1124, 1097, 766, 698  $\text{cm}^{-1}$ ; HRMS (ESI):  $m/z$   $[\text{M}+\text{H}]^+$  calcd for  $\text{C}_{29}\text{H}_{18}\text{F}_3\text{N}_2\text{O}$ : 467.1366, found: 467.1356.

### 5,6-Diphenyl-3-(trifluoromethoxy)-12H-quinolino[2,1-b]quinazolin-12-one (3ha)

Yellow solid; 48 mg, yield 50%; mp 197-199  $^\circ\text{C}$ ;  $^1\text{H}$  NMR (400 MHz,  $\text{CDCl}_3$ )  $\delta$  9.53 (d,  $J = 9.6$  Hz, 1H), 8.41 (dd,  $J = 8.0, 0.8$  Hz, 1H), 7.69 (ddd,  $J = 8.4, 6.8, 1.6$  Hz, 1H), 7.55 (d,  $J = 8.0$  Hz,

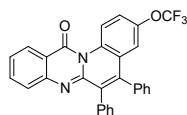

1H), 7.45 (ddd,  $J = 8.0, 7.2, 0.8$  Hz, 1H), 7.41 (dd,  $J = 9.6, 1.6$  Hz, 1H), 7.32-7.26 (m, 3H), 7.24-7.18 (m, 3H), 7.17-7.09 (m, 5H);  $^{13}\text{C}$  NMR (100 MHz,  $\text{CDCl}_3$ )  $\delta$  163.2, 147.2, 146.3, 146.3, 143.6, 136.3, 136.3, 135.7, 134.5, 133.0, 130.9, 129.9, 128.3, 128.0, 127.6, 127.4, 127.4, 127.2, 127.0, 126.5, 123.2, 120.7, 120.4 (q,  $^1J = 256.5$  Hz), 119.6, 119.1; IR (KBr): 3063, 1682, 1609, 1542, 1468, 1248, 1169, 1065, 775, 698  $\text{cm}^{-1}$ ; HRMS (ESI):  $m/z$   $[\text{M}+\text{H}]^+$  calcd for  $\text{C}_{29}\text{H}_{18}\text{F}_3\text{N}_2\text{O}_2$ : 483.1315, found: 483.1317.

### 2-Methyl-5,6-diphenyl-12H-quinolino[2,1-b]quinazolin-12-one (3ia)

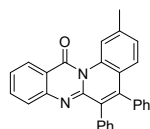

Yellow solid; 68 mg, yield 82%; mp 260-263 °C;  $^1\text{H}$  NMR (400 MHz,  $\text{CDCl}_3$ )  $\delta$  9.26 (s, 1H), 8.42 (d,  $J = 7.6$  Hz, 1H), 7.68 (ddd,  $J = 8.0, 6.8, 1.2$  Hz, 1H), 7.53 (d,  $J = 8.0$  Hz, 1H), 7.44 (t,  $J = 7.6$  Hz, 1H), 7.28-7.23 (m, 3H), 7.21-7.09 (m, 9H), 2.53 (s, 3H);  $^{13}\text{C}$  NMR (100 MHz,  $\text{CDCl}_3$ )  $\delta$  163.5, 147.8, 146.5, 144.7, 139.2, 136.8, 136.7, 134.8, 134.2, 133.7, 131.1, 130.0, 128.0, 127.5, 127.4, 127.2, 127.1, 127.0, 126.7, 125.9, 123.3, 121.7, 119.7, 22.2; IR (KBr): 3057, 1676, 1606, 1547, 1470, 1290, 816, 766, 694  $\text{cm}^{-1}$ ; HRMS (ESI):  $m/z$   $[\text{M}+\text{H}]^+$  calcd for  $\text{C}_{29}\text{H}_{21}\text{N}_2\text{O}$ : 413.1648, found: 413.1656.

### 2-Chloro-5,6-diphenyl-12H-quinolino[2,1-b]quinazolin-12-one (3ja)

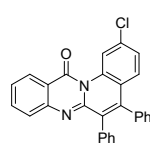

Yellow solid; 69 mg, yield 80%; mp 243-246 °C;  $^1\text{H}$  NMR (400 MHz,  $\text{CDCl}_3$ )  $\delta$  9.58 (d,  $J = 1.2$  Hz, 1H), 8.42 (d,  $J = 7.6$  Hz, 1H), 7.69 (t,  $J = 7.2$  Hz, 1H), 7.54 (d,  $J = 8.4$  Hz, 1H), 7.46 (t,  $J = 7.2$  Hz, 1H), 7.30-7.08 (m, 12H);  $^{13}\text{C}$  NMR (100 MHz,  $\text{CDCl}_3$ )  $\delta$  163.2, 147.3, 146.3, 143.9, 136.4, 136.1, 135.3, 135.0, 134.9, 134.5, 131.0, 129.9, 128.5, 128.2, 127.8, 127.6, 127.3, 127.2, 126.9, 126.4, 126.3, 124.1, 121.5, 119.6; IR (KBr): 3057, 1676, 1539, 1468, 1344, 872, 770, 694  $\text{cm}^{-1}$ ; HRMS (ESI):  $m/z$   $[\text{M}+\text{H}]^+$  calcd for  $\text{C}_{28}\text{H}_{18}\text{ClN}_2\text{O}$ : 433.1102, found: 433.1111.

### 2-Methoxy-5,6-diphenyl-12H-quinolino[2,1-b]quinazolin-12-one (3ka) and 4-methoxy-5,6-diphenyl-12H-quinolino[2,1-b]quinazolin-12-one (3ka') (17:3)

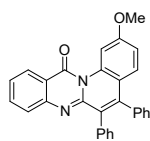

Yellow solid; 80 mg, yield 93%; mp 204-209 °C;  $^1\text{H}$  NMR (400 MHz,  $\text{CDCl}_3$ )  $\delta$  9.16 (s, 0.85H), 8.81 (d,  $J = 8.4$  Hz, 0.15H), 8.51-8.33 (m, 1H), 7.68 (t,  $J = 7.4$  Hz, 1H), 7.55-7.48 (m, 1H), 7.43 (t,  $J = 7.2$  Hz, 1H), 7.26-7.00 (m, 10.7H), 6.98 (d,  $J = 6.8$  Hz, 0.3H), 6.91 (d,  $J = 8.0$  Hz, 0.85H), 6.84 (d,  $J = 8.0$  Hz, 0.15H), 3.96 (s, 2.55H), 3.29 (s, 0.45H);  $^{13}\text{C}$  NMR (100 MHz,  $\text{CDCl}_3$ )  $\delta$  163.7, 159.8, 148.0, 146.5, 144.7, 136.9, 136.8, 136.3, 134.2, 132.1, 131.3, 131.1, 130.0, 129.0, 128.7, 128.3, 128.0, 127.9, 127.5, 127.4, 127.2, 127.1, 127.1, 126.7, 126.6, 126.4, 125.8, 119.5, 119.3, 114.0, 109.8, 105.9, 56.0, 55.8; IR (KBr): 3055, 1684, 1600, 1543, 1470, 1277, 1069, 760, 696  $\text{cm}^{-1}$ ; HRMS (ESI):  $m/z$   $[\text{M}+\text{H}]^+$  calcd for  $\text{C}_{29}\text{H}_{21}\text{N}_2\text{O}_2$ : 429.1598, found: 429.1589.

### 2-Fluoro-5,6-diphenyl-12H-quinolino[2,1-b]quinazolin-12-one (3la) and 4-fluoro-5,6-diphenyl-12H-quinolino[2,1-b]quinazolin-12-one (3la') (6:4)

Yellow solid; 68 mg, yield 80%; mp 235-240 °C;  $^1\text{H}$  NMR (400 MHz,  $\text{CDCl}_3$ )  $\delta$  9.35 (d,  $J = 12.4$

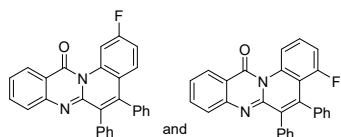

Hz, 0.4H), 9.07 (d,  $J = 8.4$  Hz, 0.6H), 8.41 (t,  $J = 8.4$  Hz, 1H), 7.75-7.64 (m, 1H), 7.57-7.42 (m, 2.6H), 7.28-7.24 (m, 1.4H), 7.22-6.98 (m, 10H).  $^{13}\text{C}$  NMR (100 MHz,  $\text{CDCl}_3$ )  $\delta$  163.3, 163.2, 162.1 (d,  $^1J = 251.2$  Hz), 159.1 (d,  $^1J = 255.2$  Hz), 147.5, 147.1, 146.4, 146.3, 146.1, 144.1, 140.3 (d,  $^4J = 1.0$  Hz) 138.7 (d,  $^3J = 4.2$  Hz), 136.7, 136.5, 136.4, 135.9, 135.8, 135.6 (d,  $^3J = 2.7$  Hz) 134.5, 134.0, 131.0, 130.9, 129.9, 129.2, 129.1, 129.0, 128.6 (d,  $^3J = 4.0$  Hz), 128.2, 127.6 (d,  $^2J = 21.2$  Hz), 127.5, 127.4, 127.3, 127.2 (d,  $^3J = 3.4$  Hz), 127.1, 126.9 (d,  $^2J = 23.5$  Hz), 126.8, 126.4, 126.3, 122.2 (d,  $^4J = 2.3$  Hz), 119.7, 119.4, 117.2 (d,  $^3J = 3.9$  Hz), 115.0, 114.9, 113.8 (d,  $^2J = 22.8$  Hz), 113.7 (d,  $^2J = 22.1$  Hz), 109.2, 109.0; IR (KBr): 3057, 1682, 1597, 1547, 1458, 1267, 908, 760, 694  $\text{cm}^{-1}$ ; HRMS (ESI):  $m/z$   $[\text{M}+\text{H}]^+$  calcd for  $\text{C}_{28}\text{H}_{18}\text{FN}_2\text{O}$ : 417.1398, found: 417.1389.

### 1-Methoxy-5,6-diphenyl-12H-quinolino[2,1-b]quinazolin-12-one (3ma)

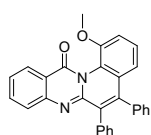

Yellow solid; 61 mg, yield 71%; mp 274-276 °C;  $^1\text{H}$  NMR (400 MHz,  $\text{CDCl}_3$ )  $\delta$  8.30 (dd,  $J = 7.6, 0.8$  Hz, 1H), 7.66 (ddd,  $J = 8.0, 6.8, 1.2$  Hz, 1H), 7.56 (d,  $J = 8.0$  Hz, 1H), 7.42 (ddd,  $J = 8.0, 7.2, 0.8$  Hz, 1H), 7.35-6.94 (m, 12H), 6.83 (dd,  $J = 8.0, 0.8$  Hz, 1H), 4.02 (s, 3H);  $^{13}\text{C}$  NMR (100 MHz,  $\text{CDCl}_3$ )  $\delta$  161.7, 151.8, 148.3, 147.0, 144.1, 136.4, 135.8, 134.8, 133.6, 131.1, 129.7, 128.5, 128.0, 127.6, 127.3, 127.3, 126.9, 126.6, 126.4, 125.8, 122.8, 120.1, 119.1, 113.0, 56.4; IR (KBr): 3013, 1699, 1537, 1466, 1263, 1119, 891, 777, 704  $\text{cm}^{-1}$ ; HRMS (ESI):  $m/z$   $[\text{M}+\text{H}]^+$  calcd for  $\text{C}_{29}\text{H}_{21}\text{N}_2\text{O}_2$ : 429.1598, found: 429.1589.

### 6,7-Diphenyl-15H-benzo[6,7]quinolino[2,1-b]quinazolin-15-one (3na)

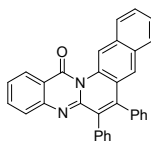

Yellow solid; 60 mg, yield 67%; mp 271-273 °C;  $^1\text{H}$  NMR (400 MHz,  $\text{CDCl}_3$ )  $\delta$  9.98 (s, 1H), 8.45 (d,  $J = 8.0$  Hz, 1H), 7.99 (d,  $J = 8.4$  Hz, 1H), 7.71 (s, 1H), 7.68-7.62 (m, 2H), 7.55-7.48 (m, 2H), 7.46-7.42 (m, 2H), 7.33-7.26 (m, 3H), 7.23-7.16 (m, 7H);  $^{13}\text{C}$  NMR (100 MHz,  $\text{CDCl}_3$ )  $\delta$  163.5, 147.7, 146.1, 144.7, 136.9, 136.7, 134.5, 134.2, 132.7, 131.7, 131.1, 130.6, 130.2, 128.6, 128.1, 127.8, 127.7, 127.6, 127.4, 127.4, 127.3, 127.2, 126.7, 126.6, 126.5, 125.1, 120.3, 120.1; IR (KBr): 3053, 1676, 1602, 1547, 1472, 1337, 1200, 887, 770, 696  $\text{cm}^{-1}$ ; HRMS (ESI):  $m/z$   $[\text{M}+\text{H}]^+$  calcd for  $\text{C}_{32}\text{H}_{21}\text{N}_2\text{O}$ : 449.1648, found: 449.1644.

### 11-Methyl-5,6-diphenyl-12H-quinolino[2,1-b]quinazolin-12-one (3oa)

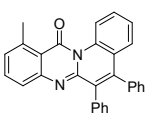

Yellow solid; 78 mg, yield 94%; mp 239-242 °C;  $^1\text{H}$  NMR (400 MHz,  $\text{CDCl}_3$ )  $\delta$  9.10 (d,  $J = 8.8$  Hz, 1H), 7.53-7.46 (m, 2H), 7.36 (d,  $J = 8.0$  Hz, 1H), 7.27-7.10 (m, 13H), 2.97 (s, 3H);  $^{13}\text{C}$  NMR (100 MHz,  $\text{CDCl}_3$ )  $\delta$  163.9, 148.1, 147.3, 144.4, 140.8, 136.6, 136.5, 134.5, 134.4, 133.4, 131.1, 130.1, 128.6, 128.4, 128.0, 127.6, 127.6, 127.3, 126.8, 125.7, 125.6, 125.6, 120.9, 118.5, 23.2; IR (KBr): 3051, 1686, 1545, 1447, 1304, 1022, 748, 689, 581  $\text{cm}^{-1}$ ; HRMS (ESI):  $m/z$   $[\text{M}+\text{H}]^+$  calcd for  $\text{C}_{29}\text{H}_{21}\text{N}_2\text{O}$ : 413.1648, found: 413.1656.

### 10-Methyl-5,6-diphenyl-12H-quinolino[2,1-b]quinazolin-12-one (3pa)

Yellow solid; 74 mg, yield 89%; mp 236-238 °C;  $^1\text{H}$  NMR (400 MHz,  $\text{CDCl}_3$ )  $\delta$  9.41 (d,  $J = 8.8$

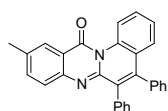

Hz, 1H), 8.21 (s, 1H), 7.56-7.43 (m, 3H), 7.29-7.09 (m, 12H), 2.49 (s, 3H); <sup>13</sup>C NMR (100 MHz, CDCl<sub>3</sub>) δ 163.4, 147.0, 144.5, 144.1, 136.8, 136.6, 136.3, 135.9, 134.8, 134.8, 131.1, 130.1, 128.5, 128.0, 127.5, 127.4, 127.3, 126.7, 126.4, 125.9, 125.6, 121.4, 119.5, 21.5; IR (KBr): 3051, 1686, 1545, 1445, 1304, 1020, 748, 690, 581 cm<sup>-1</sup>; HRMS (ESI): *m/z* [M+H]<sup>+</sup> calcd for C<sub>29</sub>H<sub>21</sub>N<sub>2</sub>O: 413.1648, found: 413.1656.

---

### 9-Methyl-5,6-diphenyl-12H-quinolino[2,1-b]quinazolin-12-one (3qa)

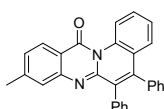

Yellow solid; 73 mg, yield 88%; mp 256-259 °C; <sup>1</sup>H NMR (400 MHz, CDCl<sub>3</sub>) δ 9.43 (d, *J* = 8.8 Hz, 1H), 8.31 (d, *J* = 8.4 Hz, 1H), 7.59-7.51 (m, 1H), 7.34 (s, 1H), 7.29-7.10 (m, 13H), 2.42 (s, 3H); <sup>13</sup>C NMR (100 MHz, CDCl<sub>3</sub>) δ 163.3, 147.8, 146.5, 145.3, 144.5, 136.8, 136.6, 134.9, 134.8, 131.0, 130.0, 128.6, 128.0, 127.9, 127.6, 127.6, 127.3, 127.0, 127.0, 126.7, 125.8, 125.6, 121.4, 117.4, 21.8; IR (KBr): 3059, 1674, 1614, 1543, 1445, 1352, 1032, 758, 698, 582 cm<sup>-1</sup>; HRMS (ESI): *m/z* [M+H]<sup>+</sup> calcd for C<sub>29</sub>H<sub>21</sub>N<sub>2</sub>O: 413.1648, found: 413.1656.

---

### 8-Methyl-5,6-diphenyl-12H-quinolino[2,1-b]quinazolin-12-one (3ra)

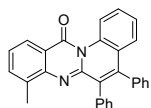

Yellow solid; 58 mg, yield 70%; mp 207-209 °C; <sup>1</sup>H NMR (400 MHz, CDCl<sub>3</sub>) δ 9.46 (d, *J* = 8.8 Hz, 1H), 8.26 (d, *J* = 8.0 Hz, 1H), 7.58-7.52 (m, 2H), 7.34 (d, *J* = 8.0 Hz, 1H), 7.31-7.24 (m, 5H), 7.21-7.13 (m, 7H), 2.27 (s, 3H); <sup>13</sup>C NMR (100 MHz, CDCl<sub>3</sub>) δ 163.7, 146.5, 145.0, 143.9, 136.8, 136.6, 136.0, 135.1, 134.8, 134.6, 131.1, 130.2, 128.6, 128.1, 127.6, 127.0, 126.6, 125.9, 125.8, 125.7, 124.7, 121.4, 119.6, 16.7; IR (KBr): 3065, 1678, 1543, 1443, 1340, 1055, 772, 694, 582 cm<sup>-1</sup>; HRMS (ESI): *m/z* [M+H]<sup>+</sup> calcd for C<sub>29</sub>H<sub>21</sub>N<sub>2</sub>O: 413.1648, found: 413.1656.

---

### 10-Fluoro-5,6-diphenyl-12H-quinolino[2,1-b]quinazolin-12-one (3sa)

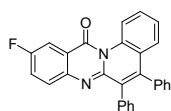

Yellow solid; 73 mg, yield 87%; mp 252-255 °C; <sup>1</sup>H NMR (400 MHz, CDCl<sub>3</sub>) δ 9.43 (d, *J* = 8.8 Hz, 1H), 8.06 (dd, *J* = 8.8, 2.8 Hz, 1H), 7.62-7.53 (m, 2H), 7.42 (td, *J* = 8.4, 2.8 Hz, 1H), 7.36-7.31 (m, 2H), 7.28-7.25 (m, 3H), 7.23-7.09 (m, 7H); <sup>13</sup>C NMR (100 MHz, CDCl<sub>3</sub>) δ 162.7 (d, <sup>4</sup>*J* = 3.7 Hz), 160.5 (d, <sup>1</sup>*J* = 246.3 Hz), 147.1, 144.6, 143.2, 136.5, 136.4, 134.6, 134.5, 131.0, 130.0, 129.9 (d, <sup>3</sup>*J* = 6.3 Hz), 128.7, 128.1, 127.4, 127.6 (d, <sup>4</sup>*J* = 4.1 Hz), 127.3, 126.8, 126.2, 125.7, 123.2 (d, <sup>2</sup>*J* = 24.4 Hz), 121.4, 120.6 (d, <sup>3</sup>*J* = 8.9 Hz), 111.6 (d, <sup>2</sup>*J* = 23.7 Hz); IR (KBr): 3055, 1678, 1545, 1479, 1362, 1248, 760, 698 cm<sup>-1</sup>; HRMS (ESI): *m/z* [M+H]<sup>+</sup> calcd for C<sub>28</sub>H<sub>18</sub>FN<sub>2</sub>O: 417.1389, found: 417.1389.

---

### 10-Chloro-5,6-diphenyl-12H-quinolino[2,1-b]quinazolin-12-one (3ta)

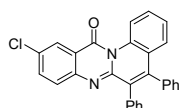

Yellow solid; 73 mg, yield 84%; mp 254-257 °C; <sup>1</sup>H NMR (400 MHz, CDCl<sub>3</sub>) δ 9.40 (d, *J* = 8.8 Hz, 1H), 8.36 (d, *J* = 2.4 Hz, 1H), 7.60-7.54 (m, 2H), 7.46 (d, *J* = 8.8 Hz, 1H), 7.32-7.23 (m, 5H), 7.21-7.09 (m, 7H); <sup>13</sup>C NMR (100 MHz, CDCl<sub>3</sub>) δ 162.3, 147.8, 145.1, 144.9, 136.5, 136.4, 134.7, 134.6, 134.6, 131.6, 131.0, 130.0, 129.2, 128.8, 128.1, 127.7, 127.7, 127.3, 126.8, 126.4, 126.2, 125.6, 121.4, 120.5; IR (KBr): 3072, 1678, 1535, 1466, 1281, 1063, 827, 754, 698, 579 cm<sup>-1</sup>; HRMS (ESI): *m/z* [M+H]<sup>+</sup> calcd for C<sub>28</sub>H<sub>18</sub>ClN<sub>2</sub>O: 433.1102, found: 433.1111.

---

**9-Chloro-5,6-diphenyl-12H-quinolino[2,1-b]quinazolin-12-one (3ua)**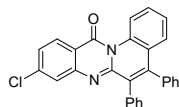

Yellow solid; 65 mg, yield 75%; mp 242-244 °C; <sup>1</sup>H NMR (400 MHz, CDCl<sub>3</sub>) δ 9.40 (d, *J* = 8.8 Hz, 1H), 8.32 (d, *J* = 8.8 Hz, 1H), 7.61-7.49 (m, 2H), 7.37-7.30 (m, 3H), 7.27-7.09 (m, 10H); <sup>13</sup>C NMR (100 MHz, CDCl<sub>3</sub>) δ 162.7, 148.7, 147.3, 145.4, 140.5, 136.4, 136.3, 134.6, 131.0, 130.0, 128.9, 128.7, 128.1, 127.8, 127.7, 127.4, 126.9, 126.7, 126.6, 126.2, 125.5, 121.4, 118.0; IR (KBr): 3059, 1680, 1595, 1539, 1454, 1252, 1072, 775, 698 cm<sup>-1</sup>; HRMS (ESI): *m/z* [M+H]<sup>+</sup> calcd for C<sub>28</sub>H<sub>18</sub>ClN<sub>2</sub>O: 433.1102, found: 433.1111.

---

**9,10-Dimethoxy-5,6-diphenyl-12H-quinolino[2,1-b]quinazolin-12-one (3va)**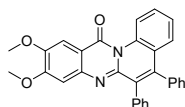

Yellow solid; 53 mg, yield 57%; mp 272-274 °C; <sup>1</sup>H NMR (400 MHz, CDCl<sub>3</sub>) δ 9.53 (d, *J* = 8.8 Hz, 1H), 7.77 (s, 1H), 7.58 (s, 1H), 7.36-7.26 (m, 4H), 7.25-7.09 (m, 8H), 6.93 (s, 1H), 4.06 (s, 3H), 3.94 (s, 3H); <sup>13</sup>C NMR (100 MHz, CDCl<sub>3</sub>) δ 162.6, 155.3, 149.0, 146.8, 143.8, 143.1, 136.9, 136.6, 134.8, 134.6, 131.0, 130.1, 128.4, 128.0, 127.5, 127.3, 126.7, 125.8, 125.6, 121.5, 113.2, 107.7, 105.7, 56.4, 56.3; IR (KBr): 3057, 1666, 1499, 1404, 1302, 1238, 1030, 862, 772, 700 cm<sup>-1</sup>; HRMS (ESI): *m/z* [M+H]<sup>+</sup> calcd for C<sub>30</sub>H<sub>23</sub>N<sub>2</sub>O<sub>3</sub>: 459.1703, found: 459.1703.

---

**6,7,8-Triphenyl-11H-pyrido[2,1-b]quinazolin-11-one (3wa)**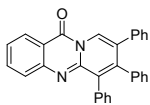

Yellow solid; 46 mg, yield 71%; mp 211-213 °C; <sup>1</sup>H NMR (400 MHz, CDCl<sub>3</sub>) δ 8.99 (s, 1H), 8.46 (d, *J* = 8.0 Hz, 1H), 7.73 (t, *J* = 7.2 Hz, 1H), 7.65 (d, *J* = 8.4 Hz, 1H), 7.44 (t, *J* = 7.2 Hz, 1H), 7.25-7.18 (m, 8H), 7.14-7.08 (m, 2H), 7.04-6.97 (m, 3H), 6.85-6.79 (m, 2H); <sup>13</sup>C NMR (100 MHz, CDCl<sub>3</sub>) δ 159.3, 148.6, 146.9, 146.2, 137.0, 136.8, 136.2, 136.1, 134.6, 131.5, 130.4, 129.8, 128.4, 128.2, 128.0, 127.5, 127.4, 127.4, 127.1, 127.1, 127.1, 125.2, 125.0, 115.9; IR (KBr): 3059, 1682, 1530, 1449, 1346, 1306, 1173, 773, 698 cm<sup>-1</sup>; HRMS (ESI): *m/z* [M+H]<sup>+</sup> calcd for C<sub>30</sub>H<sub>21</sub>N<sub>2</sub>O: 425.1648, found: 425.1641.

---

**5,6-Di-*p*-tolyl-12H-quinolino[2,1-b]quinazolin-12-one (3ab)**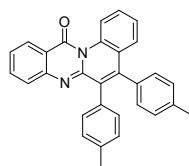

Yellow solid; 75 mg, yield 88%; mp 245-249 °C; <sup>1</sup>H NMR (400 MHz, CDCl<sub>3</sub>) δ 9.38 (d, *J* = 8.8 Hz, 1H), 8.42 (dd, *J* = 8.0, 0.8 Hz, 1H), 7.67 (ddd, *J* = 8.4, 6.8, 1.6 Hz, 1H), 7.58-7.50 (m, 2H), 7.43 (ddd, *J* = 8.0, 7.2, 0.8 Hz, 1H), 7.32-7.25 (m, 2H), 7.09-7.03 (m, 4H), 7.03-6.98 (m, 4H), 2.32 (s, 3H), 2.30 (s, 3H); <sup>13</sup>C NMR (100 MHz, CDCl<sub>3</sub>) δ 163.4, 147.8, 146.5, 144.6, 137.1, 136.2, 134.7, 134.6, 134.1, 133.7, 133.6, 131.0, 129.9, 128.8, 128.4, 128.0, 127.6, 127.5, 127.1, 126.0, 125.9, 125.9, 121.3, 119.7, 21.3, 21.3; IR (KBr): 3022, 1678, 1537, 1468, 1342, 1055, 822, 770 cm<sup>-1</sup>; HRMS (ESI): *m/z* [M+H]<sup>+</sup> calcd for C<sub>30</sub>H<sub>23</sub>N<sub>2</sub>O: 427.1805, found: 427.1803.

---

**5,6-Bis(4-methoxyphenyl)-12H-quinolino[2,1-b]quinazolin-12-one (3ac)**

Yellow solid; 80 mg, yield 87%; mp 205-209 °C; <sup>1</sup>H NMR (400 MHz, CDCl<sub>3</sub>) δ 9.37 (d, *J* = 8.8 Hz, 1H), 8.41 (dd, *J* = 8.0, 0.8 Hz, 1H), 7.67 (ddd, *J* = 8.0, 6.8, 1.2 Hz, 1H), 7.58-7.49 (m, 2H), 7.42 (t, *J* = 7.6 Hz, 1H), 7.34 (dd, *J* = 8.0, 1.6 Hz, 1H), 7.28 (t, *J* = 7.6 Hz, 1H), 7.08 (d, *J* = 8.8 Hz,



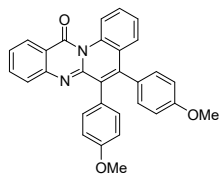

2H), 7.02 (d,  $J = 8.4$  Hz, 2H), 6.81 (d,  $J = 8.8$  Hz, 2H), 6.75 (d,  $J = 8.8$  Hz, 2H), 3.78 (s, 3H), 3.76 (s, 3H);  $^{13}\text{C}$  NMR (100 MHz,  $\text{CDCl}_3$ )  $\delta$  163.4, 158.8, 158.2, 147.8, 146.5, 144.4, 134.7, 134.5, 134.2, 132.3, 131.3, 129.1, 128.9, 128.4, 127.6, 127.5, 127.1, 126.0, 125.9, 121.3, 119.7, 113.6, 112.8, 55.2, 55.1; IR (KBr): 2835, 1686, 1607, 1541, 1466, 1286, 1246, 1175, 1030, 830, 758  $\text{cm}^{-1}$ ; HRMS (ESI):  $m/z$   $[\text{M}+\text{H}]^+$  calcd for  $\text{C}_{30}\text{H}_{23}\text{N}_2\text{O}_3$ : 459.1703, found: 459.1703.

#### 5,6-Bis(4-fluorophenyl)-12H-quinolino[2,1-b]quinazolin-12-one (3ad)

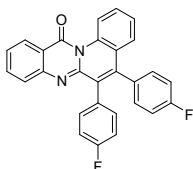

Yellow solid; 61 mg, yield 70%; mp 254-257  $^{\circ}\text{C}$ ;  $^1\text{H}$  NMR (400 MHz,  $\text{CDCl}_3$ )  $\delta$  9.41 (d,  $J = 8.8$  Hz, 1H), 8.42 (dd,  $J = 8.0, 1.2$  Hz, 1H), 7.70 (ddd,  $J = 8.4, 7.2, 1.2$  Hz, 1H), 7.60-7.52 (m, 2H), 7.46 (ddd,  $J = 8.0, 7.2, 0.8$  Hz, 1H), 7.32 (ddd,  $J = 8.0, 7.2, 0.8$  Hz, 1H), 7.27 (dd,  $J = 8.0, 1.6$  Hz, 1H), 7.12-7.06 (m, 4H), 7.02-6.97 (m, 2H), 6.95-6.89 (m, 2H);  $^{13}\text{C}$  NMR (100 MHz,  $\text{CDCl}_3$ )  $\delta$  163.2, 162.1 (d,  $^1J = 246.5$  Hz), 161.7 (d,  $^1J = 244.6$  Hz), 147.4, 146.3, 143.9, 134.8, 134.4, 134.2, 132.7 (d,  $^3J = 8.0$  Hz), 132.4 (d,  $^4J = 3.5$  Hz), 132.3 (d,  $^4J = 3.6$  Hz), 131.8 (d,  $^3J = 8.1$  Hz), 128.9, 127.4, 127.2, 126.3, 126.0, 125.3, 121.5, 119.8, 115.4 (d,  $^2J = 21.5$  Hz), 114.5 (d,  $^2J = 21.4$  Hz); IR (KBr): 3044, 1680, 1543, 1229, 1155, 1057, 835, 546, 478  $\text{cm}^{-1}$ ; HRMS (ESI):  $m/z$   $[\text{M}+\text{H}]^+$  calcd for  $\text{C}_{28}\text{H}_{17}\text{N}_2\text{F}_2\text{O}$ : 435.1303, found: 435.1306.

#### 5,6-Bis(4-chlorophenyl)-12H-quinolino[2,1-b]quinazolin-12-one (3ae)

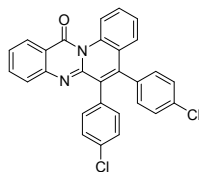

Yellow solid; 83 mg, yield 89%; mp 229-231  $^{\circ}\text{C}$ ;  $^1\text{H}$  NMR (400 MHz,  $\text{CDCl}_3$ )  $\delta$  9.41 (d,  $J = 8.8$  Hz, 1H), 8.42 (d,  $J = 8.8$  Hz, 1H), 7.71 (t,  $J = 7.6$  Hz, 1H), 7.61-7.51 (m, 2H), 7.47 (t,  $J = 7.6$  Hz, 1H), 7.34-7.28 (m, 3H), 7.24-7.14 (m, 3H), 7.11-7.03 (m, 4H);  $^{13}\text{C}$  NMR (100 MHz,  $\text{CDCl}_3$ )  $\delta$  163.2, 147.1, 146.2, 143.6, 134.9, 134.8, 134.7, 134.4, 134.0, 133.9, 133.0, 132.4, 131.3, 129.1, 128.7, 127.8, 127.4, 127.4, 127.2, 126.4, 126.1, 125.0, 121.5, 119.8; IR (KBr): 3063, 1680, 1543, 1468, 1344, 1088, 1013, 820, 764, 527  $\text{cm}^{-1}$ ; HRMS (ESI):  $m/z$   $[\text{M}+\text{H}]^+$  calcd for  $\text{C}_{28}\text{H}_{17}\text{Cl}_2\text{N}_2\text{O}$ : 467.0712, found: 467.0716.

#### 5,6-Bis(4-(trifluoromethyl)phenyl)-12H-quinolino[2,1-b]quinazolin-12-one (3af)

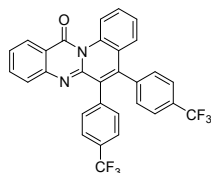

Yellow solid; 105 mg, yield 98%; mp 247-250  $^{\circ}\text{C}$ ;  $^1\text{H}$  NMR (400 MHz,  $\text{CDCl}_3$ )  $\delta$  9.45 (d,  $J = 8.8$  Hz, 1H), 8.41 (dd,  $J = 8.0, 0.8$  Hz, 1H), 7.69 (ddd,  $J = 8.4, 6.8, 1.6$  Hz, 1H), 7.61-7.56 (m, 3H), 7.52-7.43 (m, 4H), 7.32 (t,  $J = 7.6$  Hz, 1H), 7.29-7.25 (m, 4H), 7.17 (dd,  $J = 8.0, 1.2$  Hz, 1H).  $^{13}\text{C}$  NMR (100 MHz,  $\text{CDCl}_3$ )  $\delta$  163.1, 146.8, 146.1, 143.4, 140.0, 139.8, 135.0, 134.5, 133.9, 131.3, 130.4 (q,  $^3J = 7.4$  Hz), 130.3 (q,  $^2J = 32.4$  Hz), 129.4 (q,  $^3J = 6.2$  Hz), 129.3 (q,  $^2J = 32.3$  Hz), 127.4, 127.3, 127.2, 126.6, 126.2, 125.3 (q,  $^4J = 3.6$  Hz), 124.6, 124.5 (q,  $^4J = 3.7$  Hz), 124.2 (q,  $^1J = 270.4$  Hz), 123.8 (q,  $^1J = 270.7$  Hz), 121.6, 119.8; IR (KBr): 3073, 1680, 1543, 1323, 1173, 1064, 1015, 837, 752, 636  $\text{cm}^{-1}$ ; HRMS (ESI):  $m/z$   $[\text{M}+\text{H}]^+$  calcd for  $\text{C}_{30}\text{H}_{17}\text{F}_6\text{N}_2\text{O}$ : 535.1240, found: 535.1245.

#### 5,6-Di-*m*-tolyl-12H-quinolino[2,1-b]quinazolin-12-one (3ag)

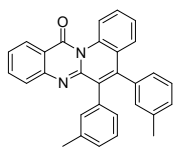

Yellow solid; 52 mg, yield 61%; mp 232-234 °C;  $^1\text{H}$  NMR (400 MHz,  $\text{CDCl}_3$ )  $\delta$  9.40 (d,  $J = 8.8$  Hz, 1H), 8.43 (d,  $J = 7.6$  Hz, 1H), 7.68 (ddd,  $J = 8.0, 7.2, 0.8$  Hz, 1H), 7.60-7.51 (m, 2H), 7.44 (t,  $J = 7.6$  Hz, 1H), 7.35-7.27 (m, 2H), 7.17-7.07 (m, 2H), 7.03 (d,  $J = 7.6$  Hz, 1H), 7.00-6.87 (m, 5H), 2.26 (s, 3H), 2.22 (s, 3H);  $^{13}\text{C}$  NMR (100 MHz,  $\text{CDCl}_3$ )  $\delta$  163.4, 147.7, 146.5, 144.8, 137.5, 136.5, 136.5, 136.5, 134.7, 134.7, 134.2, 131.8, 130.7, 128.5, 128.2, 128.2, 127.8, 127.7, 127.5, 127.5, 127.1, 127.1, 127.0, 126.0, 125.9, 125.7, 121.3, 119.7, 21.4, 21.4; IR (KBr): 2914, 1678, 1541, 1468, 1344, 764, 692  $\text{cm}^{-1}$ ; HRMS (ESI):  $m/z$   $[\text{M}+\text{H}]^+$  calcd for  $\text{C}_{30}\text{H}_{23}\text{N}_2\text{O}$ : 427.1805, found: 427.1803.

#### 5,6-Bis(3-fluorophenyl)-12H-quinolino[2,1-b]quinazolin-12-one (3ah)

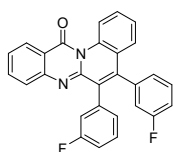

Yellow solid; 50 mg, yield 57%; mp 246-249 °C;  $^1\text{H}$  NMR (400 MHz,  $\text{CDCl}_3$ )  $\delta$  9.44 (d,  $J = 8.4$  Hz, 1H), 8.44 (dd,  $J = 8.0, 0.8$  Hz, 1H), 7.72 (ddd,  $J = 8.4, 6.8, 1.2$  Hz, 1H), 7.63-7.54 (m, 2H), 7.49 (ddd,  $J = 8.0, 7.2, 0.8$  Hz, 1H), 7.35 (ddd,  $J = 8.0, 7.2, 0.8$  Hz, 1H), 7.31-7.26 (m, 2H), 7.22-7.15 (m, 1H), 6.99 (td,  $J = 8.4, 2.0$  Hz, 1H), 6.95-6.84 (m, 5H);  $^{13}\text{C}$  NMR (100 MHz,  $\text{CDCl}_3$ )  $\delta$  163.4, 162.5 (d,  $^1J = 246.3$  Hz), 162.1 (d,  $^1J = 243.5$  Hz), 147.0, 146.2, 143.4 (d,  $^4J = 1.7$  Hz), 138.4 (d,  $^3J = 8.3$  Hz), 138.3 (d,  $^3J = 7.8$  Hz), 134.9, 134.4, 133.8 (d,  $^4J = 1.7$  Hz), 129.9 (d,  $^3J = 8.5$  Hz), 129.2, 128.9 (d,  $^3J = 8.4$  Hz), 127.5, 127.4, 127.2, 126.6 (d,  $^4J = 2.9$  Hz), 126.4, 126.1, 125.8 (d,  $^4J = 3.0$  Hz), 124.8, 121.5, 119.8, 118.1 (d,  $^2J = 22.1$  Hz), 117.0 (d,  $^2J = 22.2$  Hz), 114.9 (d,  $^2J = 21.0$  Hz), 114.1 (d,  $^2J = 21.0$  Hz); IR (KBr): 3063, 1678, 1541, 1470, 1217, 1126, 793, 689  $\text{cm}^{-1}$ ; HRMS (ESI):  $m/z$   $[\text{M}+\text{H}]^+$  calcd for  $\text{C}_{28}\text{H}_{17}\text{F}_2\text{N}_2\text{O}$ : 435.1303, found: 435.1306.

#### 5,6-Bis(3-chlorophenyl)-12H-quinolino[2,1-b]quinazolin-12-one (3ai)

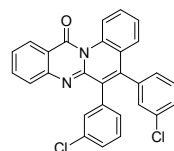

Yellow solid; 48 mg, yield 50%; mp 280-284 °C;  $^1\text{H}$  NMR (400 MHz,  $\text{CDCl}_3$ )  $\delta$  9.44 (d,  $J = 8.8$  Hz, 1H), 8.45 (d,  $J = 7.6$  Hz, 1H), 7.74 (t,  $J = 7.2$  Hz, 1H), 7.65-7.55 (m, 2H), 7.50 (t,  $J = 7.2$  Hz, 1H), 7.36 (t,  $J = 7.6$  Hz, 1H), 7.28-7.23 (m, 3H), 7.22-7.13 (m, 4H), 7.02 (d,  $J = 6.8$  Hz, 2H);  $^{13}\text{C}$  NMR (100 MHz,  $\text{CDCl}_3$ )  $\delta$  163.2, 147.0, 146.2, 143.4, 138.0, 137.8, 134.8, 134.4, 134.3, 133.7, 133.3, 131.0, 129.9, 129.6, 129.2, 129.1, 128.8, 128.2, 127.5, 127.4, 127.3, 127.2, 126.5, 126.2, 124.8, 121.5, 119.8; IR (KBr): 3059, 1678, 1541, 1470, 1346, 1076, 766  $\text{cm}^{-1}$ ; HRMS (ESI):  $m/z$   $[\text{M}+\text{H}]^+$  calcd for  $\text{C}_{28}\text{H}_{17}\text{Cl}_2\text{N}_2\text{O}$ : 467.0712, found: 467.0716.

#### 5,6-Di-*o*-tolyl-12H-quinolino[2,1-b]quinazolin-12-one (3aj) (2:1 mixture of rotomers)

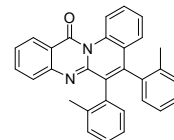

Yellow solid; 48 mg, yield 56%; mp 218-221 °C;  $^1\text{H}$  NMR (400 MHz,  $\text{CDCl}_3$ )  $\delta$  9.47 (t,  $J = 7.6$  Hz, 1H), 8.46 (d,  $J = 7.6$  Hz, 1H), 7.70 (t,  $J = 7.2$  Hz, 1H), 7.62-7.44 (m, 3H), 7.36-7.29 (m, 1H), 7.20-6.83 (m, 9H), 2.24 (s, 2H), 2.19 (s, 2H), 2.09 (s, 1H), 1.97 (s, 1H);  $^{13}\text{C}$  NMR (100 MHz,  $\text{CDCl}_3$ )  $\delta$  163.5, 146.9, 146.9, 146.7, 144.7, 144.7, 137.2, 137.0, 137.0, 136.2, 135.9, 135.8, 135.8, 135.2, 134.9, 134.8, 134.7, 134.6, 134.3, 131.5, 131.0, 130.1, 129.9, 129.5, 129.2, 128.7, 128.7, 128.1, 128.0, 127.5, 127.3, 127.2, 127.2, 127.0, 126.3, 126.2, 126.1, 125.8, 125.4, 125.2, 125.1, 124.9, 124.6, 121.5, 121.4, 119.8, 119.7, 20.3, 20.3, 20.2, 19.8; IR (KBr): 3014, 1682, 1541, 1466, 1344, 1051, 758  $\text{cm}^{-1}$ ; HRMS (ESI):  $m/z$   $[\text{M}+\text{H}]^+$  calcd for  $\text{C}_{30}\text{H}_{23}\text{N}_2\text{O}$ : 427.1805, found: 427.1803.

**5,6-Bis(2-chlorophenyl)-12H-quinolino[2,1-b]quinazolin-12-one (3ak) (55:45 mixture of rotomers)**

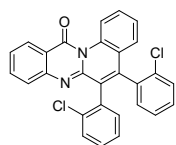

Yellow solid; 34 mg, yield 36%; mp 219-222 °C; <sup>1</sup>H NMR (400 MHz, CDCl<sub>3</sub>) δ 9.55 (d, *J* = 8.4 Hz, 0.45H), 9.47 (d, *J* = 8.8 Hz, 0.55H), 8.46 (d, *J* = 8.0 Hz, 1H), 7.71 (t, *J* = 7.6 Hz, 1H), 7.64-7.52 (m, 2H), 7.48 (t, *J* = 7.6 Hz, 1H), 7.42-7.31 (m, 2.55H), 7.25-7.04 (m, 7.45H); <sup>13</sup>C NMR (100 MHz, CDCl<sub>3</sub>) δ 163.4, 147.5, 146.5, 146.4, 146.3, 142.8, 142.2, 136.4, 136.4, 135.7, 135.4, 135.1, 134.7, 134.3, 134.3, 134.2, 133.6, 133.4, 133.2, 131.7, 130.0, 129.9, 129.8, 129.4, 129.4, 129.2, 129.2, 128.9, 128.9, 128.7, 127.5, 127.2, 127.2, 127.2, 127.1, 126.9, 126.8, 126.7, 126.5, 126.3, 126.2, 126.2, 124.3, 124.0, 121.6, 121.5, 120.0, 119.9; IR (KBr): 3057, 1684, 1543, 1468, 1342, 1055, 756, 692 cm<sup>-1</sup>; HRMS (ESI): *m/z* [M+H]<sup>+</sup> calcd for C<sub>28</sub>H<sub>17</sub>Cl<sub>2</sub>N<sub>2</sub>O: 467.0712, found: 467.0716.

**5,6-Di(thiophen-2-yl)-12H-quinolino[2,1-b]quinazolin-12-one (3al)**

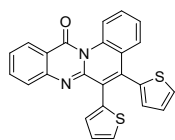

Yellow solid; 47 mg, yield 57%; mp 225-230 °C; <sup>1</sup>H NMR (400 MHz, CDCl<sub>3</sub>) δ 9.34 (d, *J* = 8.4 Hz, 1H), 8.42 (d, *J* = 8.0 Hz, 1H), 7.77-7.66 (m, 2H), 7.62-7.54 (m, 2H), 7.48 (t, *J* = 7.6 Hz, 1H), 7.43-7.33 (m, 3H), 7.09-7.01 (m, 2H), 6.95-6.87 (m, 2H). <sup>13</sup>C NMR (100 MHz, CDCl<sub>3</sub>) δ 163.1, 146.7, 146.1, 139.0, 136.9, 136.5, 134.4, 130.1, 130.0, 129.8, 129.2, 127.7, 127.5, 127.4, 127.3, 127.2, 126.8, 126.5, 126.2, 125.7, 125.4, 121.2, 119.9; IR (KBr): 3069, 1684, 1543, 1468, 1340, 1221, 1045, 770, 692 cm<sup>-1</sup>; HRMS (ESI): *m/z* [M+H]<sup>+</sup> calcd for C<sub>24</sub>H<sub>15</sub>N<sub>2</sub>OS<sub>2</sub>: 411.0620, found: 411.0627.

**5,6-Diethyl-12H-quinolino[2,1-b]quinazolin-12-one (3am)**

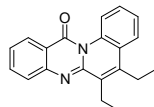

Yellow solid; 35 mg, yield 58%; mp 69-74 °C; <sup>1</sup>H NMR (400 MHz, CDCl<sub>3</sub>) δ 9.28 (d, *J* = 8.4 Hz, 1H), 8.40 (d, *J* = 8.0 Hz, 1H), 7.81 (d, *J* = 8.0 Hz, 1H), 7.78-7.72 (m, 2H), 7.53-7.42 (m, 3H), 3.12 (q, *J* = 7.2 Hz, 2H), 3.00 (q, *J* = 7.6 Hz, 2H), 1.33 (t, *J* = 7.6 Hz, 3H), 1.28 (t, *J* = 7.2 Hz, 3H); <sup>13</sup>C NMR (100 MHz, CDCl<sub>3</sub>) δ 163.6, 146.9, 146.8, 142.6, 134.2, 134.2, 134.1, 127.4, 127.2, 127.0, 126.0, 125.5, 124.4, 123.8, 121.5, 119.7, 22.1, 21.6, 14.1, 14.0; IR (KBr): 2963, 1678, 1537, 1468, 1045, 762, 689 cm<sup>-1</sup>; HRMS (ESI): *m/z* [M+H]<sup>+</sup> calcd for C<sub>20</sub>H<sub>19</sub>N<sub>2</sub>O: 303.1492, found: 303.1486.

**6-Methyl-5-phenyl-12H-quinolino[2,1-b]quinazolin-12-one (3an)**

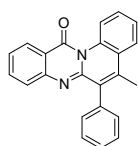

Yellow solid; 34 mg, yield 50%; mp 180-183 °C; <sup>1</sup>H NMR (400 MHz, CDCl<sub>3</sub>) δ 9.39 (d, *J* = 8.4 Hz, 1H), 8.39 (d, *J* = 8.0 Hz, 1H), 7.86 (d, *J* = 8.0 Hz, 1H), 7.66 (t, *J* = 7.6 Hz, 1H), 7.59 (t, *J* = 7.6 Hz, 1H), 7.53-7.46 (m, 4H), 7.46-7.40 (m, 2H), 7.30 (d, *J* = 6.8 Hz, 2H), 2.31 (s, 3H); <sup>13</sup>C NMR (100 MHz, CDCl<sub>3</sub>) δ 163.3, 147.7, 146.5, 139.2, 137.7, 134.7, 134.3, 134.2, 130.4, 128.5, 128.1, 127.4, 127.1, 126.2, 125.8, 125.5, 124.6, 121.4, 119.5, 17.5; IR (KBr): 3063, 1676, 1545, 1474, 1207, 905, 748, 694 cm<sup>-1</sup>; HRMS (ESI): *m/z* [M+H]<sup>+</sup> calcd for C<sub>23</sub>H<sub>17</sub>N<sub>2</sub>O: 337.1335, found: 337.1336.

**6-(4-Chlorophenyl)-5-(p-tolyl)-12H-quinolino[2,1-b]quinazolin-12-one (3ao) and 5-(4-chlorophenyl)-6-(p-tolyl)-12H-quinolino[2,1-b]quinazolin-12-one (3ao')** (1.74:1.26)

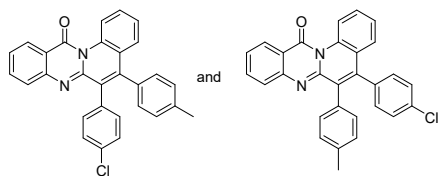

Yellow solid; 58 mg, yield 65%; mp 227-229 °C;  $^1\text{H}$  NMR (400 MHz,  $\text{CDCl}_3$ )  $\delta$  9.43-9.36 (m, 1H), 8.41 (dd,  $J = 8.0, 0.8$  Hz, 1H), 7.71-7.65 (m, 1H), 7.59-7.50 (m, 2H), 7.44 (t,  $J = 7.6$  Hz, 1H), 7.33-7.27 (m, 2H), 7.26-7.21 (m, 1H), 7.20-7.17 (m, 1H), 7.11-6.97 (m, 6H), 2.34 (s, 1.74H), 2.32 (s, 1.26H);  $^{13}\text{C}$  NMR (100 MHz,  $\text{CDCl}_3$ )  $\delta$  163.3, 163.3, 147.5, 147.4, 146.4, 146.4, 145.0, 143.2, 137.6, 136.6, 135.3, 135.2, 135.1, 134.8, 134.7, 134.3, 134.2, 133.6, 133.4, 133.2, 133.2, 132.6, 132.5, 131.5, 130.8, 129.8, 129.0, 128.8, 128.7, 128.4, 128.2, 127.7, 127.6, 127.5, 127.3, 127.2, 127.2, 127.1, 126.2, 126.1, 126.0, 126.0, 125.6, 125.3, 121.4, 121.3, 119.8, 119.7, 21.3, 21.3; IR (KBr): 3071, 1680, 1537, 1342, 1092, 1013, 834, 822, 762  $\text{cm}^{-1}$ ; HRMS (ESI):  $m/z$   $[\text{M}+\text{H}]^+$  calcd for  $\text{C}_{29}\text{H}_{20}\text{ClN}_2\text{O}$ : 447.1259, found: 447.1266.

### 3-(Phenyl- $d_5$ )quinazolin-4(3H)-one [ $\text{D}_5$ ]-1a

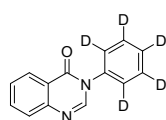

White solid, 189 mg, yield 83%; mp 136-138 °C;  $^1\text{H}$  NMR (400 MHz,  $\text{CDCl}_3$ )  $\delta$  8.37 (d,  $J = 7.6$  Hz, 1H), 8.13 (s, 1H), 7.84-7.72 (m, 2H), 7.55 (ddd,  $J = 7.6, 6.8, 0.8$  Hz, 1H);  $^{13}\text{C}$  NMR (101 MHz,  $\text{CDCl}_3$ )  $\delta$  160.8, 147.9, 146.1, 137.4, 134.6, 127.7, 127.6, 127.2, 122.4; IR (KBr): 1671, 1605, 1473, 1386, 1253, 766, 695  $\text{cm}^{-1}$ ; HRMS (ESI):  $m/z$   $[\text{M}+\text{H}]^+$  calcd for  $\text{C}_{14}\text{H}_6\text{D}_5\text{N}_2\text{O}$ : 228.1180, found: 228.1181.

## IV. Mechanistic study

### (1) H/D exchange experiment

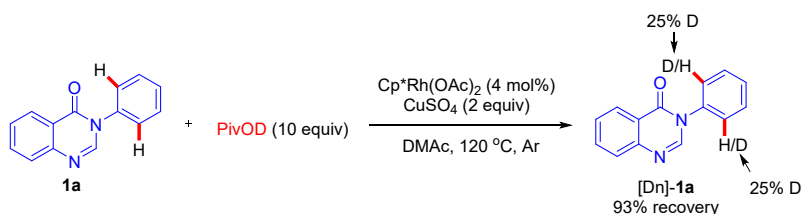

An oven-dried 10 ml schlenk tube with a magnetic stir bar was charged with 3-phenylquinazolin-4(3H)-one **1a** (0.2 mmol),  $\text{Cp}^*\text{Rh}(\text{OAc})_2$  (4 mol%),  $\text{CuSO}_4$  (2 equiv), PivOD (10 equiv) and DMAc (1 ml) under Ar. The tube was sealed with a teflon-coated cap and reaction solution was heated at 120 °C for 24 h. Afterwards the reaction was quenched with saturated  $\text{NaHCO}_3$  solution (10 ml) and extracted with EtOAc (3 X 10 ml), washed with brine and dried over anhydrous  $\text{Na}_2\text{SO}_4$ . The filtrate was concentrated and the residue was purified by column chromatography on silica gel to provide the desired product. The deuterated ratio was calculation from  $^1\text{H}$  NMR analysis.

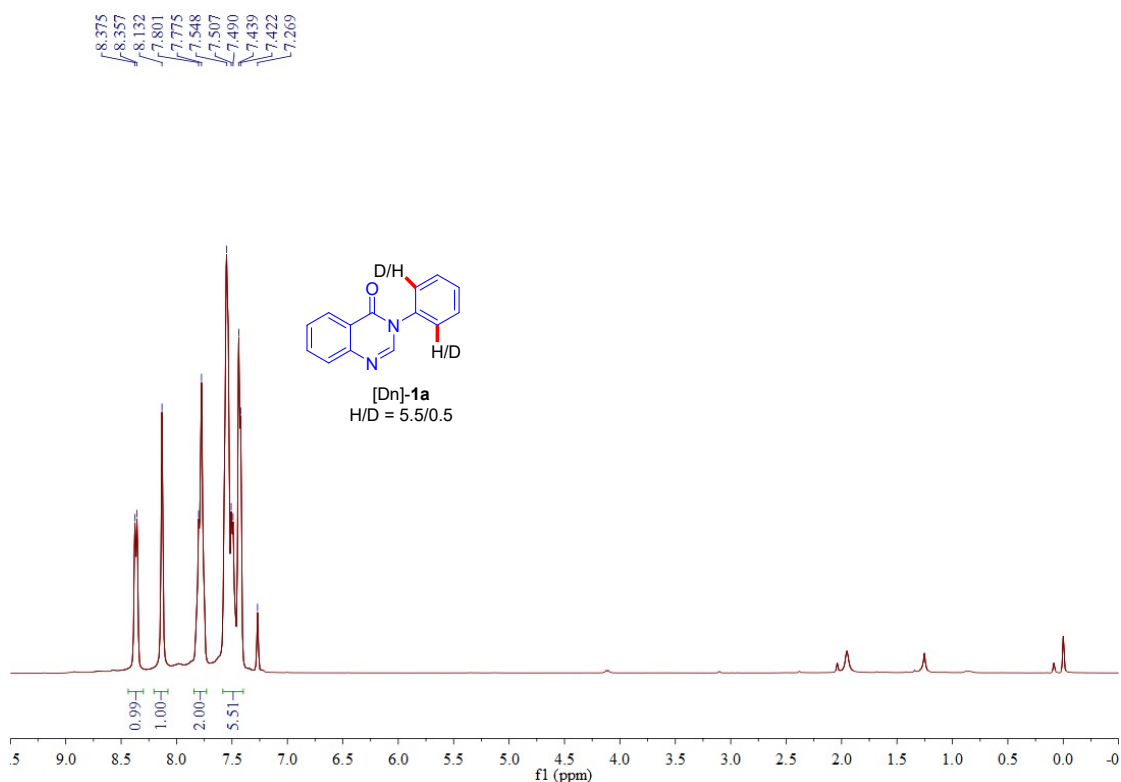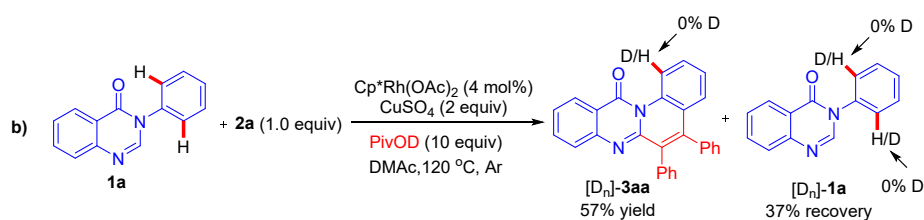

An oven-dried 10 ml schlenk tube with a magnetic stir bar was charged with 3-phenylquinazolin-4(3H)-one **1a** (0.2 mmol), 1,2-diphenylethyne **2a** (0.2 mmol),  $\text{Cp}^*\text{Rh}(\text{OAc})_2$  (4 mol%),  $\text{CuSO}_4$  (2 equiv), PivOD (10 equiv) and DMAc (1 ml) under Ar. The tube was sealed with a teflon-coated cap and reaction solution was heated at 120 °C for 24 h. Afterwards the reaction was quenched with saturated  $\text{NaHCO}_3$  solution (10 ml) and extracted with EtOAc (3 X 10 ml), washed with brine and dried over anhydrous  $\text{Na}_2\text{SO}_4$ . The filtrate was concentrated and the residue was purified by column chromatography on silica gel to provide the desired  $[\text{D}_n]\text{-3aa}$  and  $[\text{D}_n]\text{-1a}$ .  $^1\text{H}$  NMR analysis showed that no deuteration was observed.

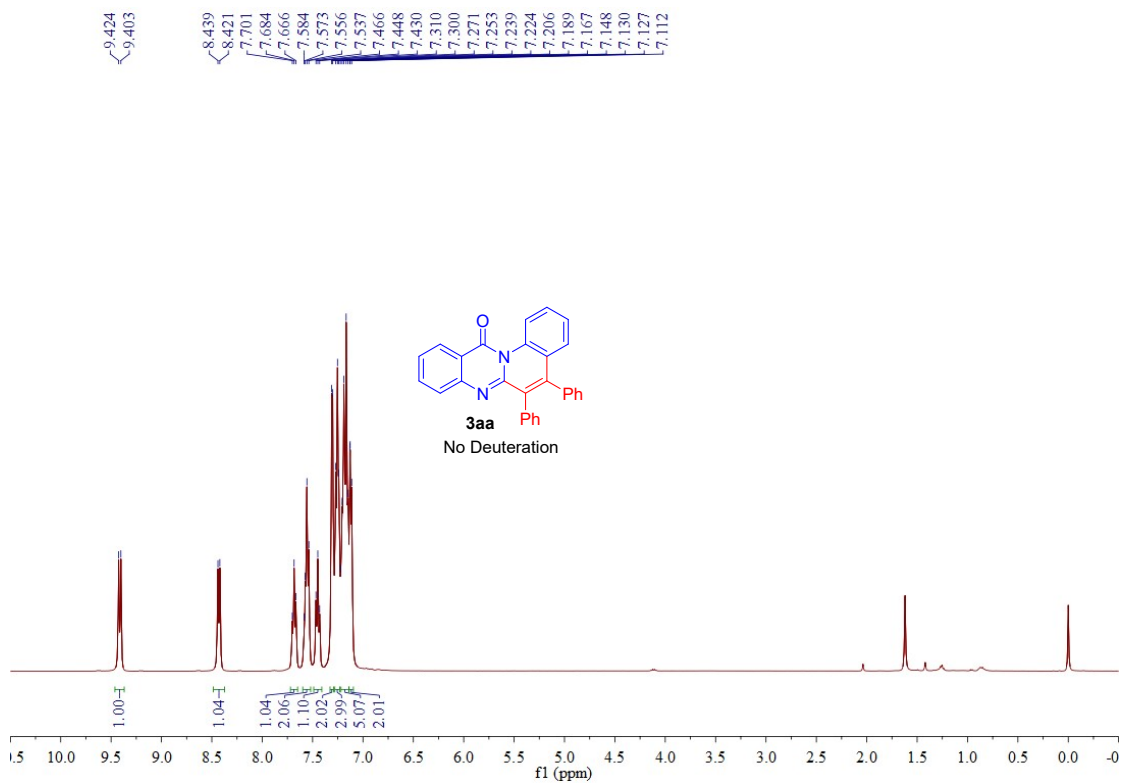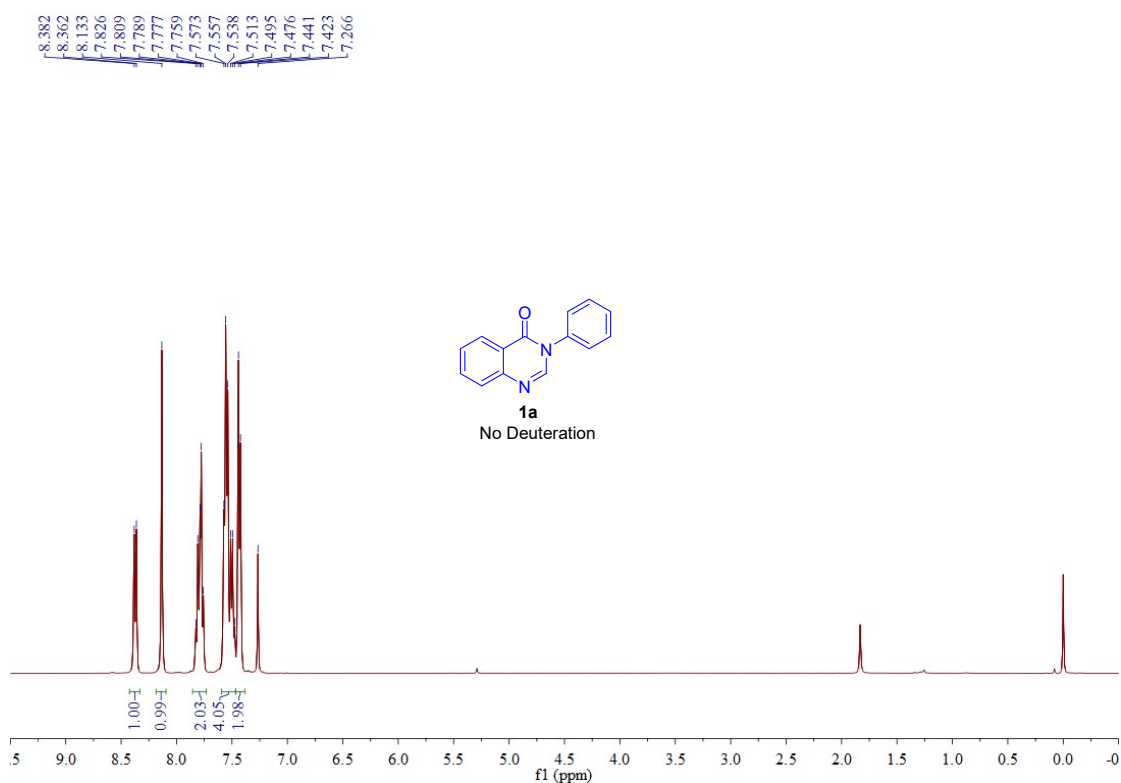

## (2) Kinetic isotope effect

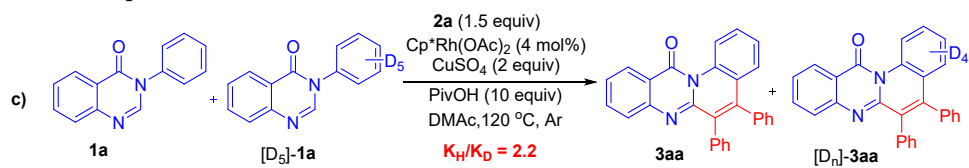

An oven-dried 10 ml schlenk tube with a magnetic stir bar was charged with 3-phenylquinazolin-4(3H)-one **1a** (0.2 mmol), 3-(phenyl-d<sub>5</sub>)quinazolin-4(3H)-one [**D**<sub>5</sub>]-**1a** (0.2 mmol), 1,2-diphenylethyne **2a** (0.3 mmol), Cp\*Rh(OAc)<sub>2</sub> (4 mol%), CuSO<sub>4</sub> (2 equiv), PivOH (10 equiv) and DMAc (1 ml) under Ar. The tube was sealed with a teflon-coated cap and reaction solution was heated at 120 °C for 24 h. Afterwards the reaction was quenched with saturated NaHCO<sub>3</sub> solution (10 ml) and extracted with EtOAc (3 X 10 ml), washed with brine and dried over anhydrous Na<sub>2</sub>SO<sub>4</sub>. The filtrate was concentrated and the residue was purified by column chromatography on silica gel to provide the desired [**D**<sub>n</sub>]-**3aa** and **3aa**. A KIE value of 2.2 was calculated on the basis of <sup>1</sup>H NMR analysis.

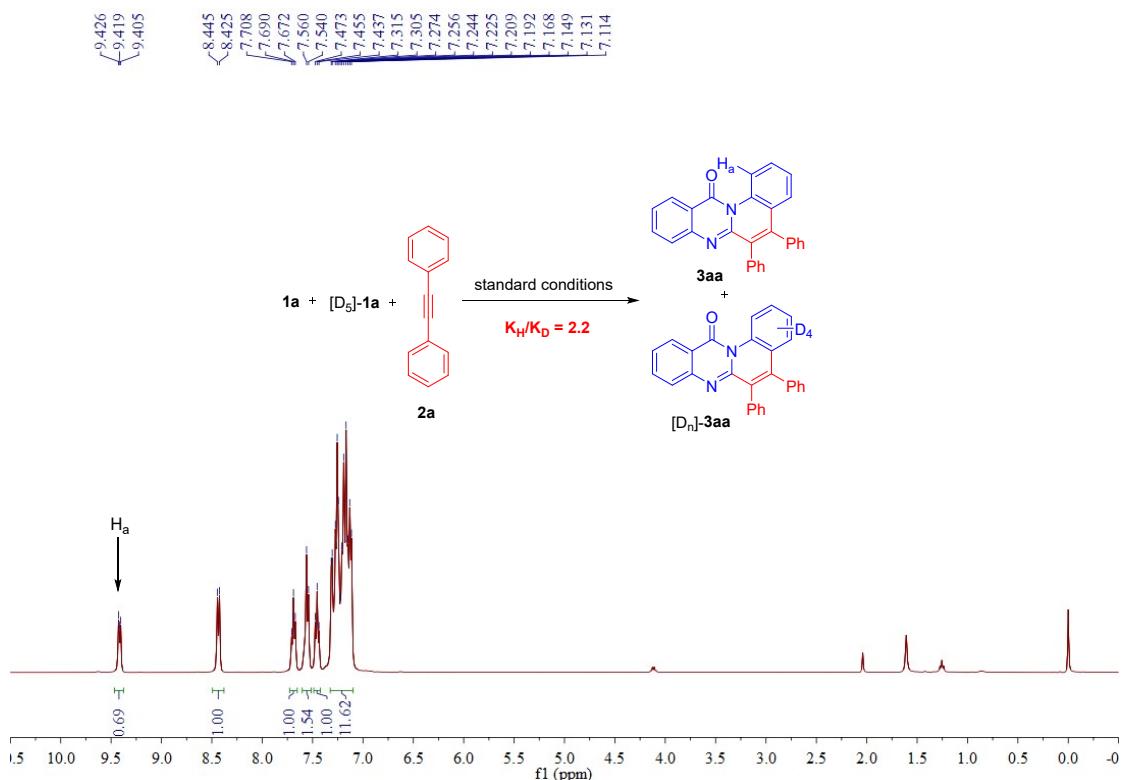

## V. X-ray crystallography date of **3ba**.

The crystal structure was deposited into the CCDC database (CCDC No. 2093120). These data can be obtained from The Cambridge Crystallographic Data Centre via [www.ccdc.cam.ac.uk/data\\_request/cif](http://www.ccdc.cam.ac.uk/data_request/cif).

By slowly volatilizing the DCM solvent, single crystals **3ba** suitable for X-ray analysis were obtained. The detailed characteristics and data are shown below.

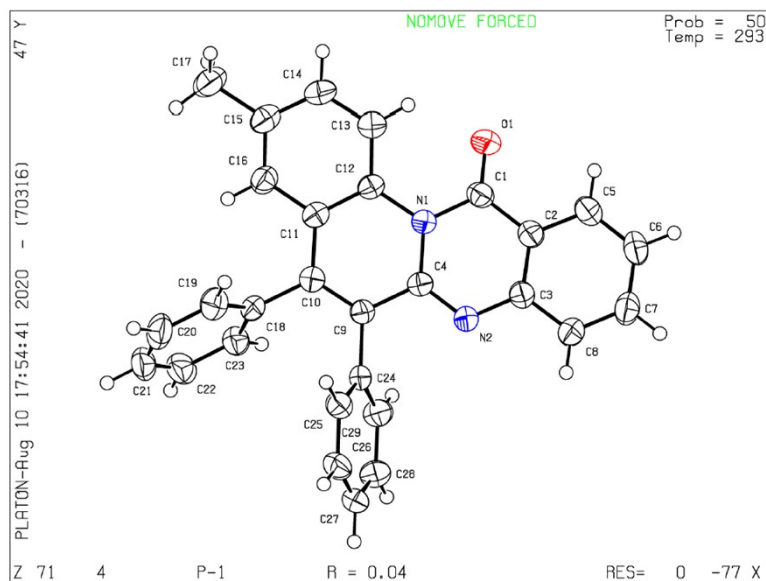

**Figure S1.**Crystal structure of compound **3ba**

**Table S1.**Crystal data and structure refinement for **4** (CCDC No. 2093120)

|                                    |                                                                                                          |
|------------------------------------|----------------------------------------------------------------------------------------------------------|
| Identification code                | 4                                                                                                        |
| Empirical formula                  | C <sub>29</sub> H <sub>20</sub> N <sub>2</sub> O                                                         |
| Formula weight                     | 412.47                                                                                                   |
| Temperature/K                      | 293(2)                                                                                                   |
| Wavelength                         | 0.71073 Å                                                                                                |
| Crystal system, space group        | Triclinic, P-1                                                                                           |
| Unit cell dimensions               | a = 9.4883(6) Å α = 86.863(7) °<br>b = 10.7030(9) Å β = 70.062(7) °<br>c = 10.9775(10) Å γ = 80.112(6) ° |
| Volume/Å <sup>3</sup>              | 1032.41(14)                                                                                              |
| Z                                  | 2                                                                                                        |
| Calculated density                 | 1.327 Mg/m <sup>3</sup>                                                                                  |
| Absorption coefficient             | 0.081 mm <sup>-1</sup>                                                                                   |
| F(000)                             | 432                                                                                                      |
| Crystal size/mm <sup>3</sup>       | 0.23 × 0.21 × 0.19                                                                                       |
| Radiation                          | MoKα (λ = 0.71073)                                                                                       |
| Theta range for data collection /° | 3.37 to 25                                                                                               |
| Limiting indices                   | -11 ≤ h ≤ 9, -12 ≤ k ≤ 12, -13 ≤ l ≤ 13                                                                  |
| Reflections collected/unique       | 11276/3590 [R <sub>int</sub> = 0.0214]                                                                   |
| Completeness to theta = 25.00      | 99.0 %                                                                                                   |
| Absorption correction              | MULTI SCAN                                                                                               |
| Max. and min. transmission         | 1.00000 and 0.81806                                                                                      |
| Refinement method                  | Full-matrix least-squares on F <sup>2</sup>                                                              |



|                                             |                                                   |
|---------------------------------------------|---------------------------------------------------|
| Data/restraints/parameters                  | 3590/0/290                                        |
| Goodness-of-fit on F <sup>2</sup>           | 1.020                                             |
| Final R indexes [I>>=2σ (I)]                | R <sub>1</sub> = 0.0446, wR <sub>2</sub> = 0.1126 |
| Final R indexes [all data]                  | R <sub>1</sub> = 0.0541, wR <sub>2</sub> = 0.1191 |
| Largest diff. peak/hole / e Å <sup>-3</sup> | 0.148/-0.244                                      |

---

## VI. References

1. G. L. Huang, B. Liu, M. Y. Teng and Y. G. Chen, Ammonium chloride-catalyzed one-pot synthesis of 4(3H)-quinazolinones under solvent-free conditions, *Synthetic Commun*, 2014, **44**, 1786-1794.
2. M. J. Mio, L. C. Kopel, J. B. Braun, T. L. Gadzikwa, K. L. Hull, R. G. Brisbois, C. J. Markworth and P. A. Grieco, One-pot synthesis of symmetrical and unsymmetrical bisarylethynes by a modification of the Sonogashira coupling reaction, *Org. Lett.*, 2002, **4**, 3199-3202.

## VII. Copy of NMR

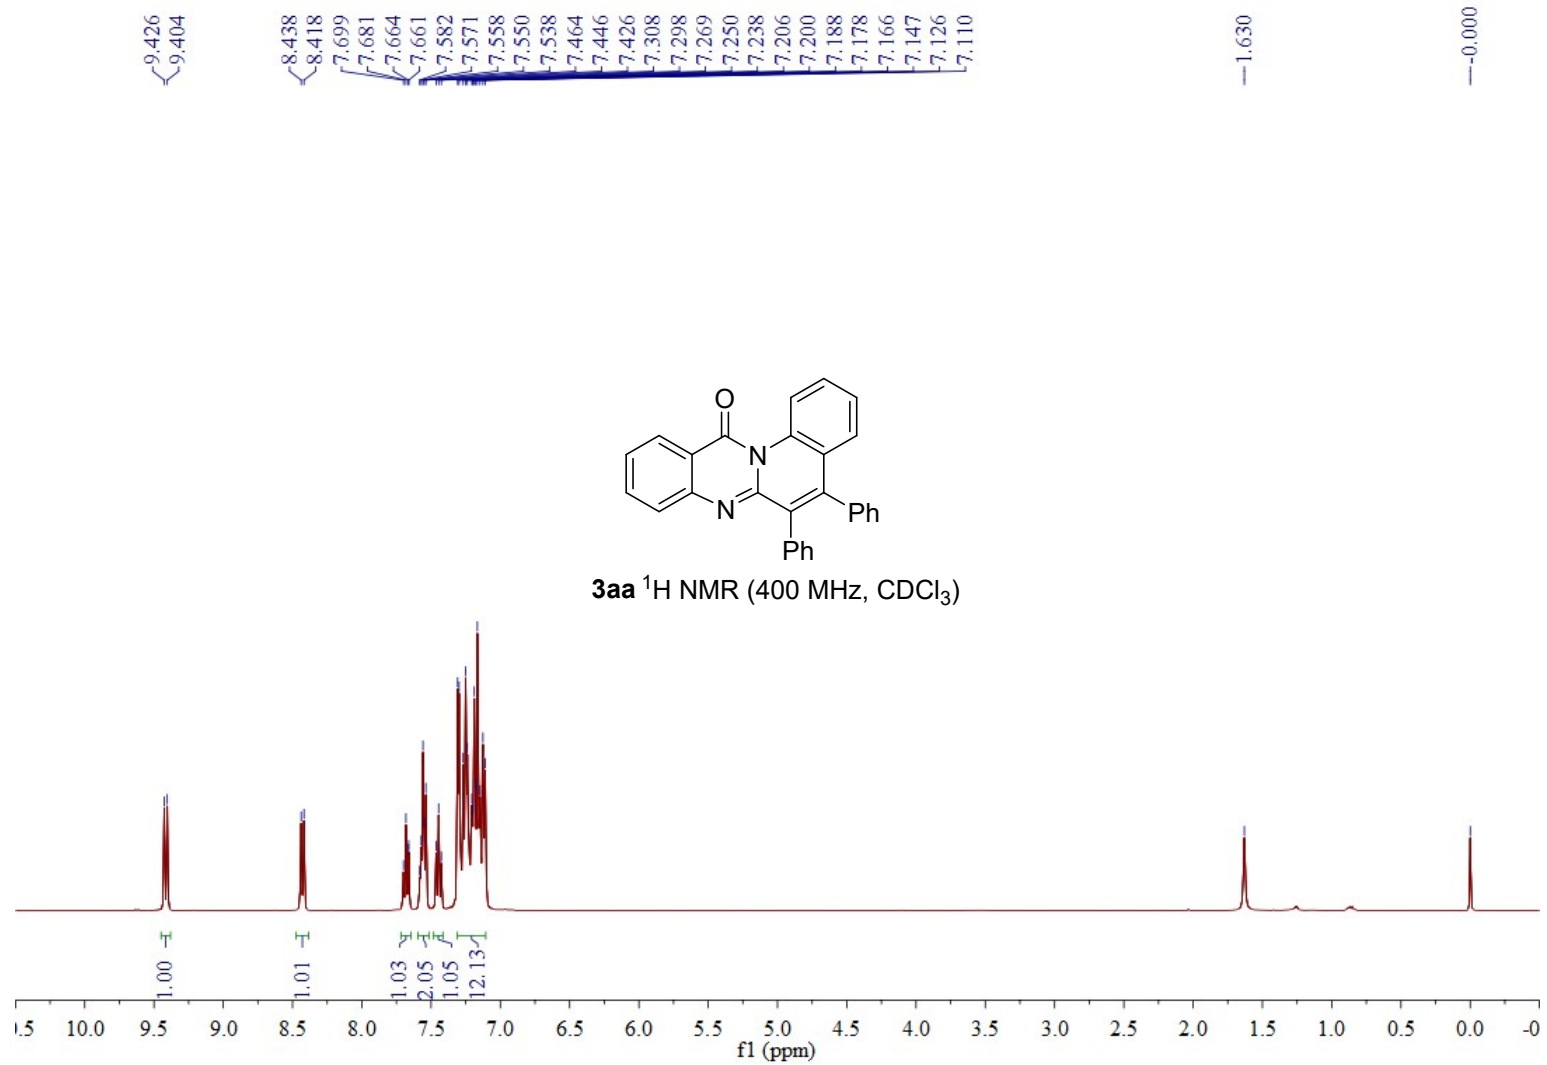

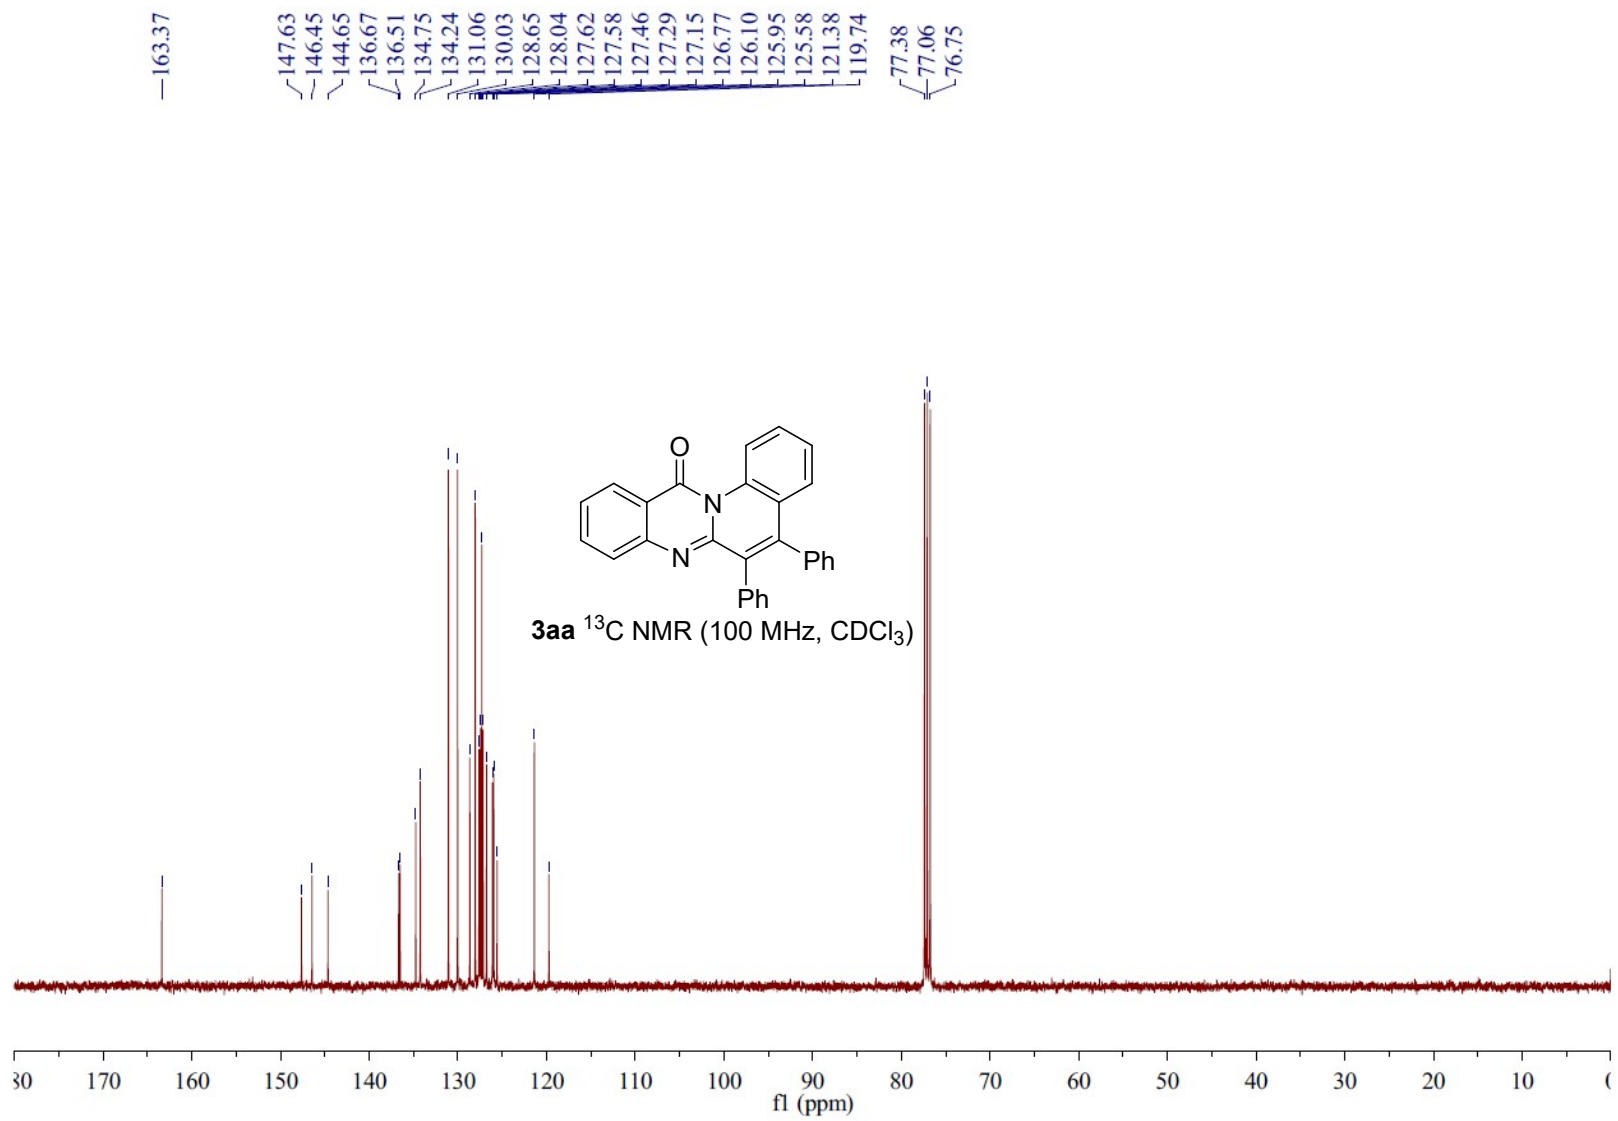

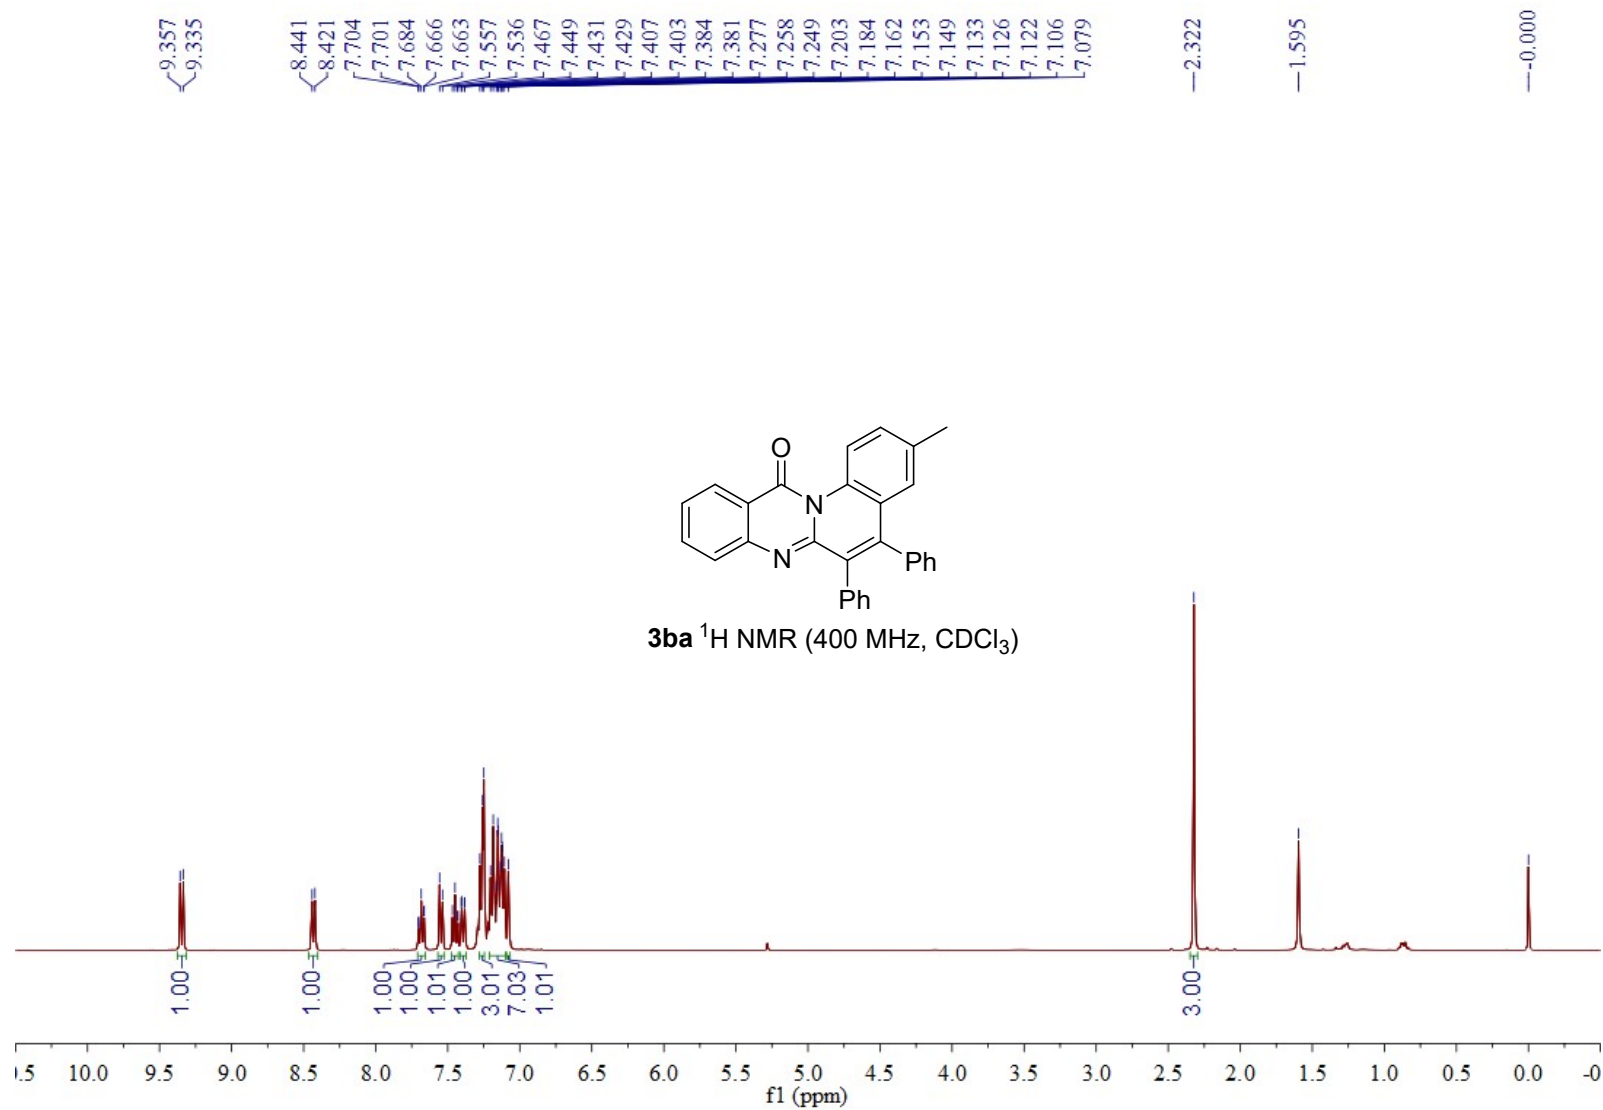

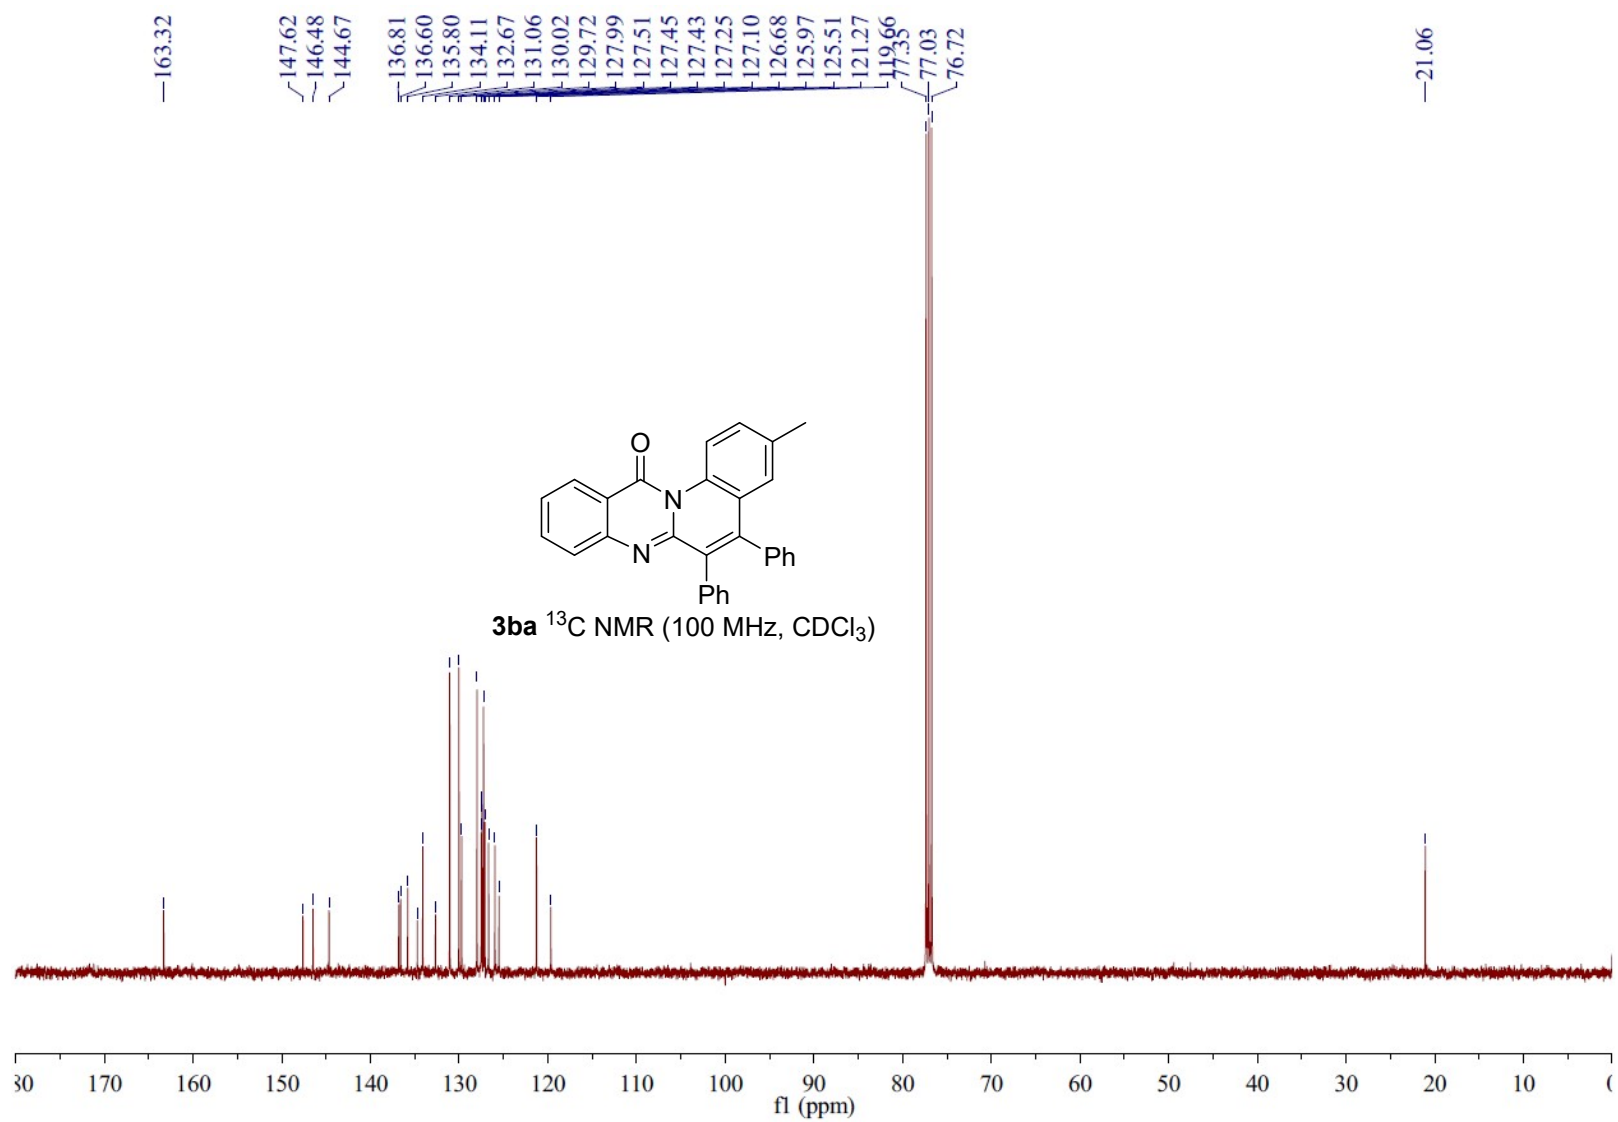

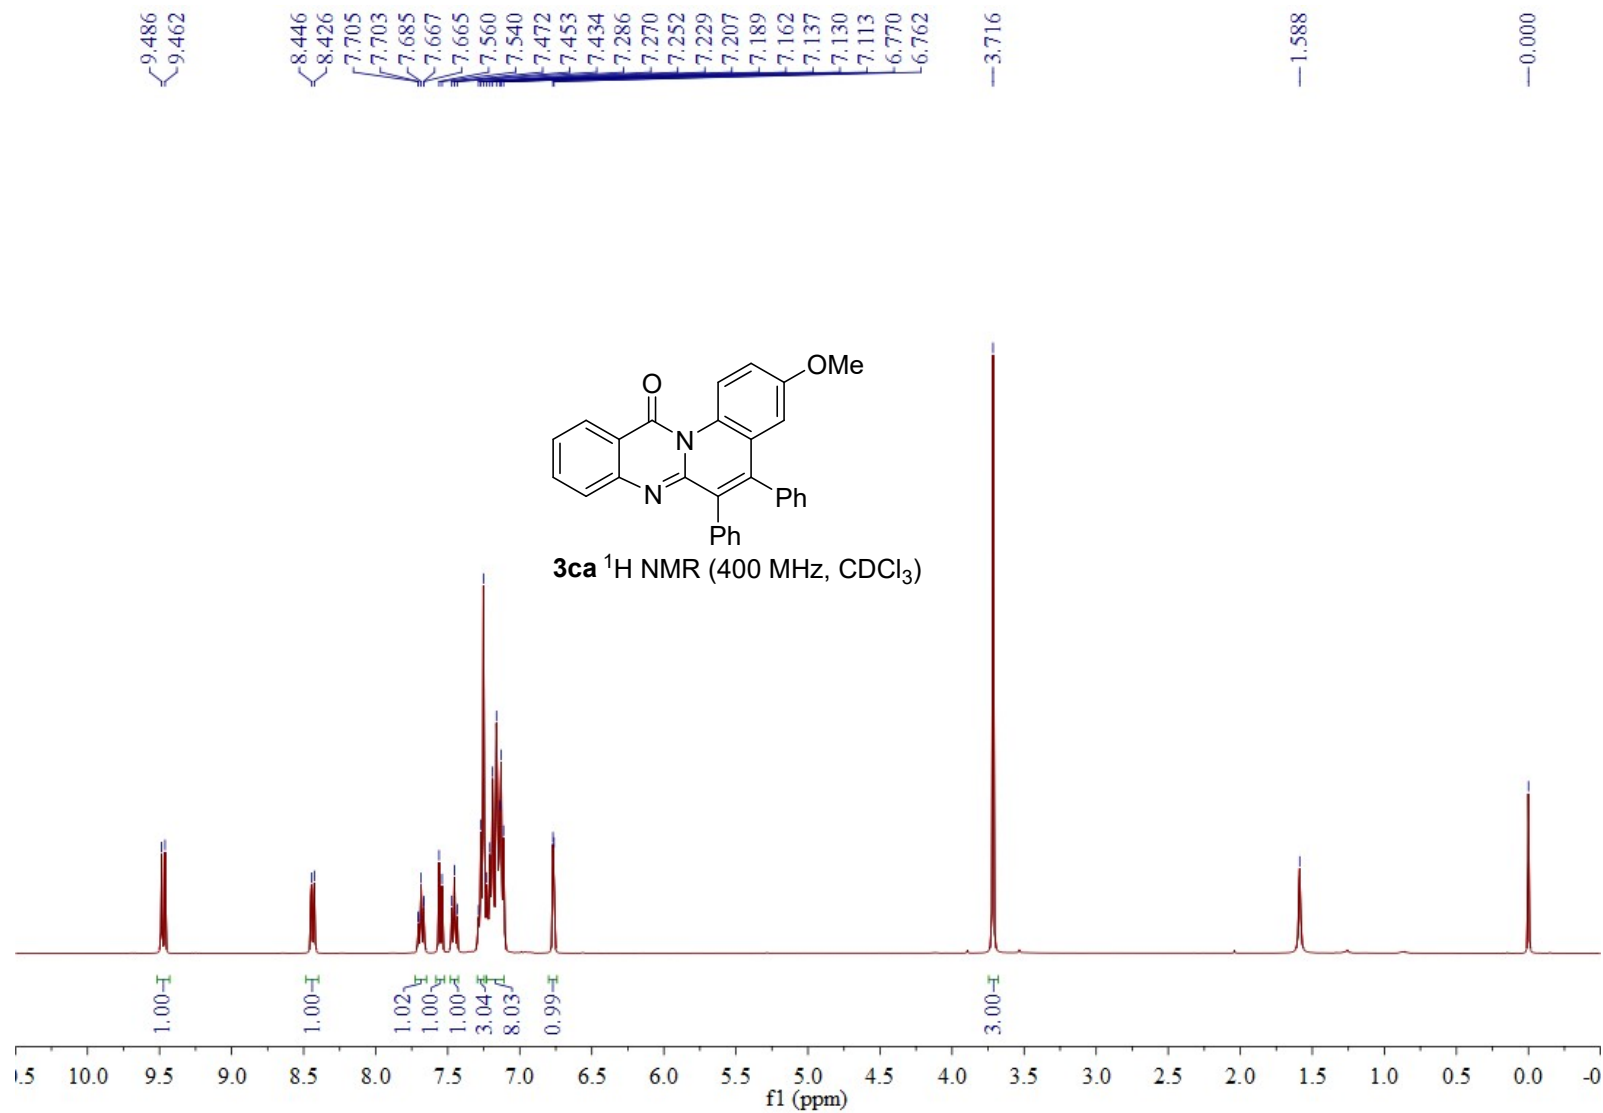

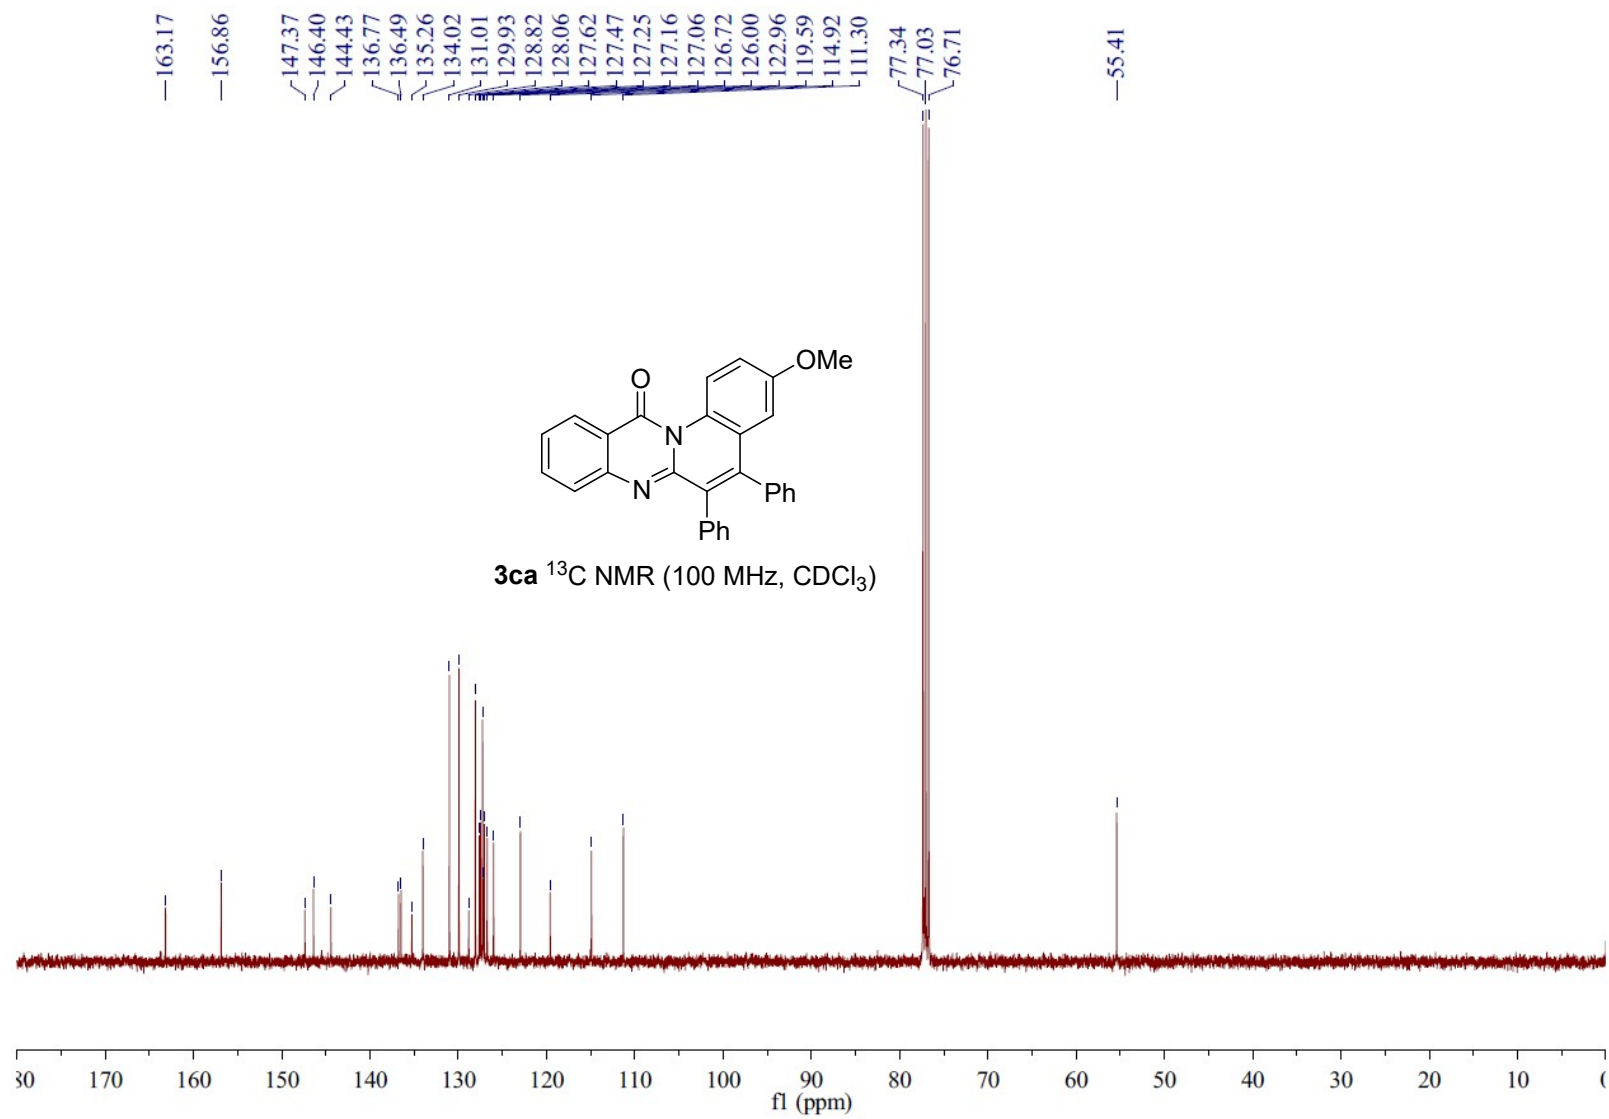

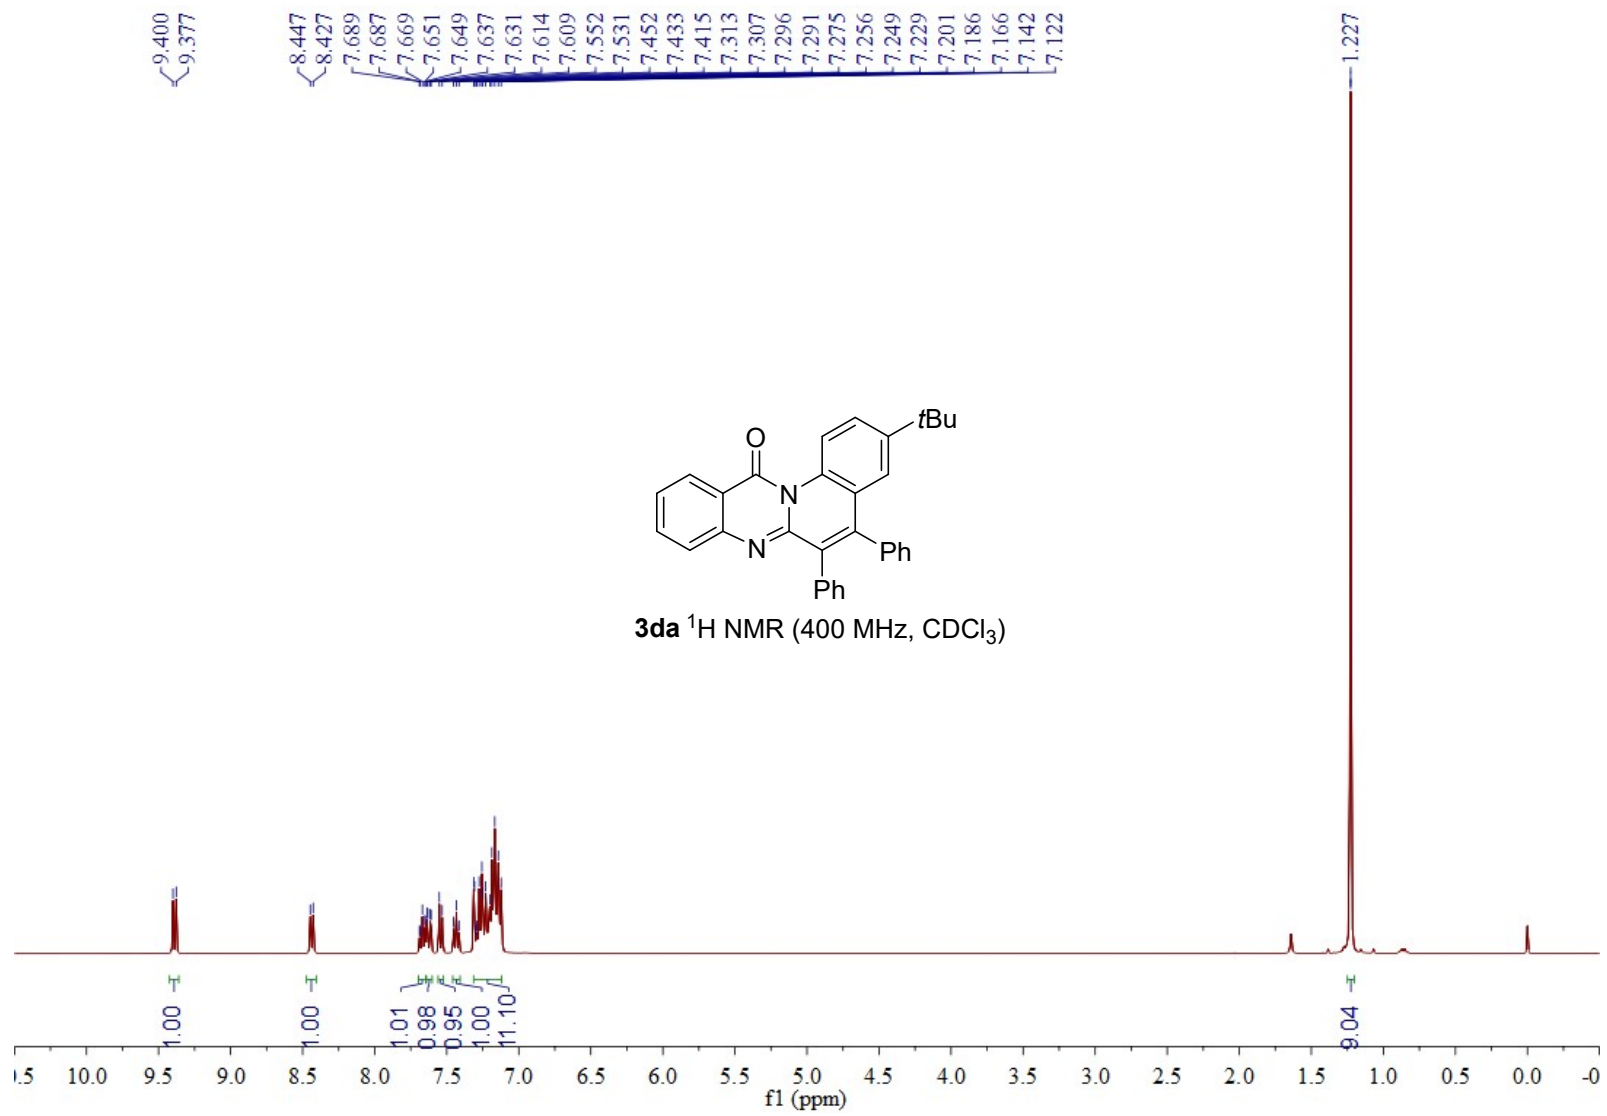



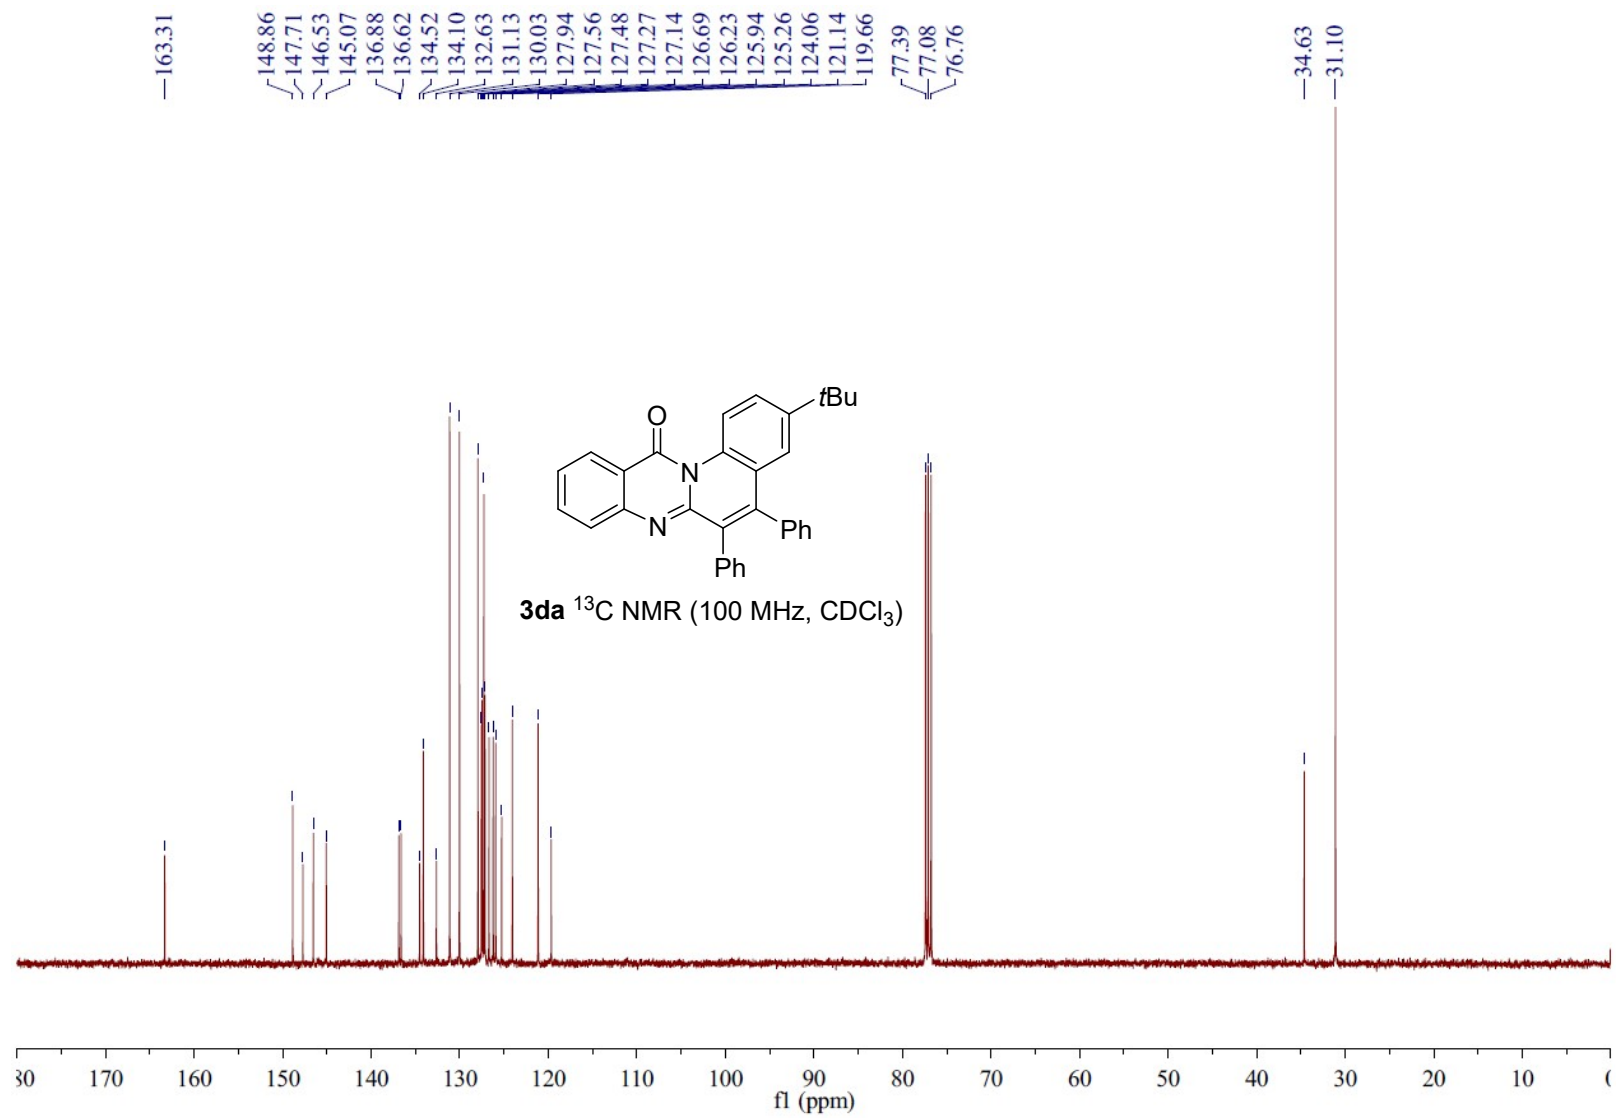

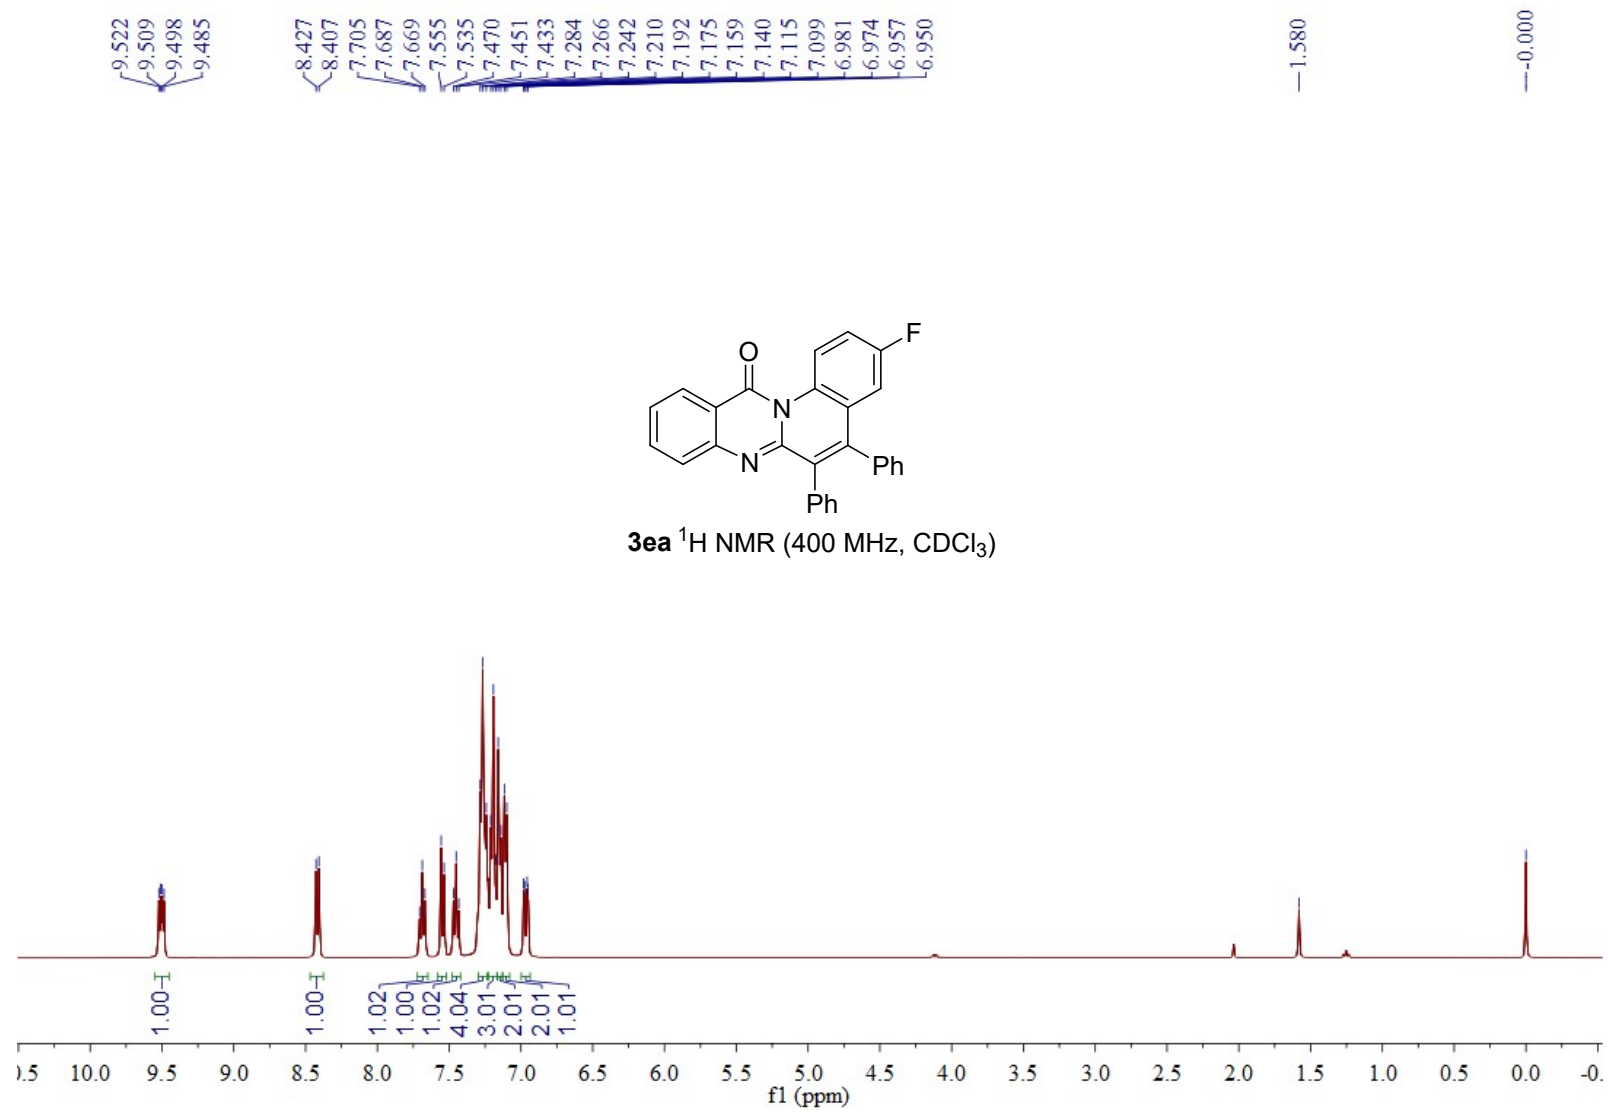

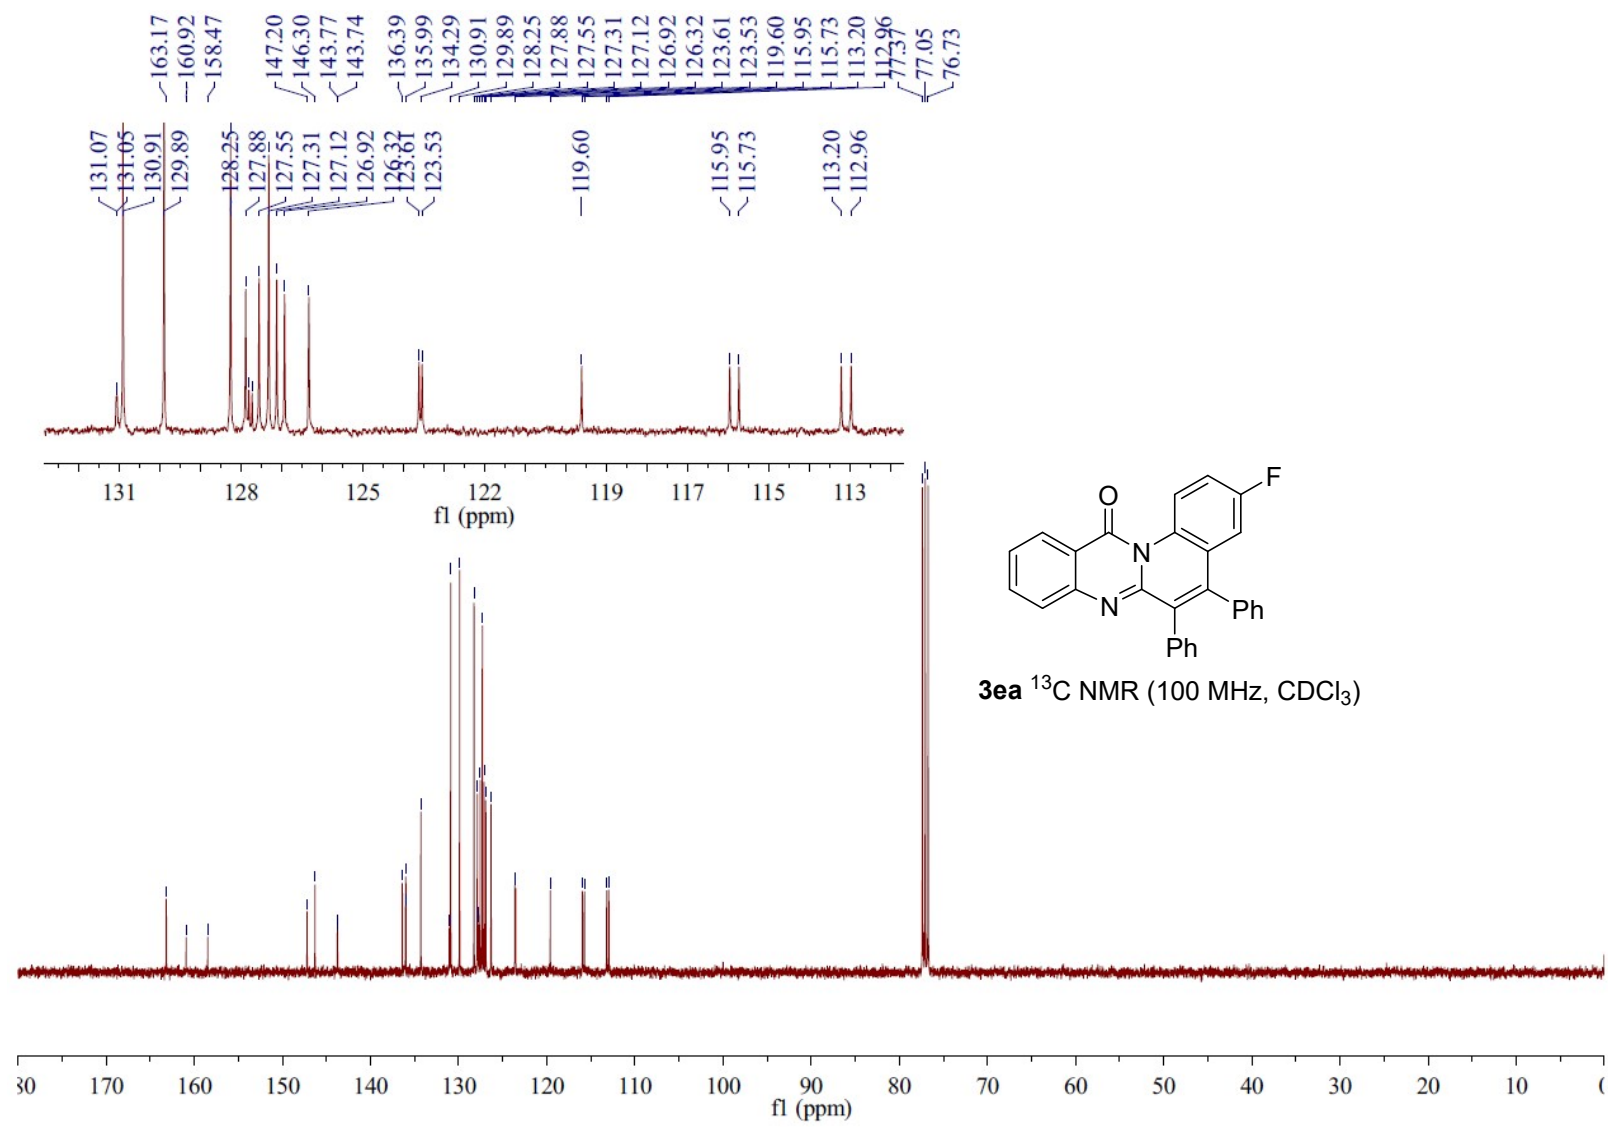

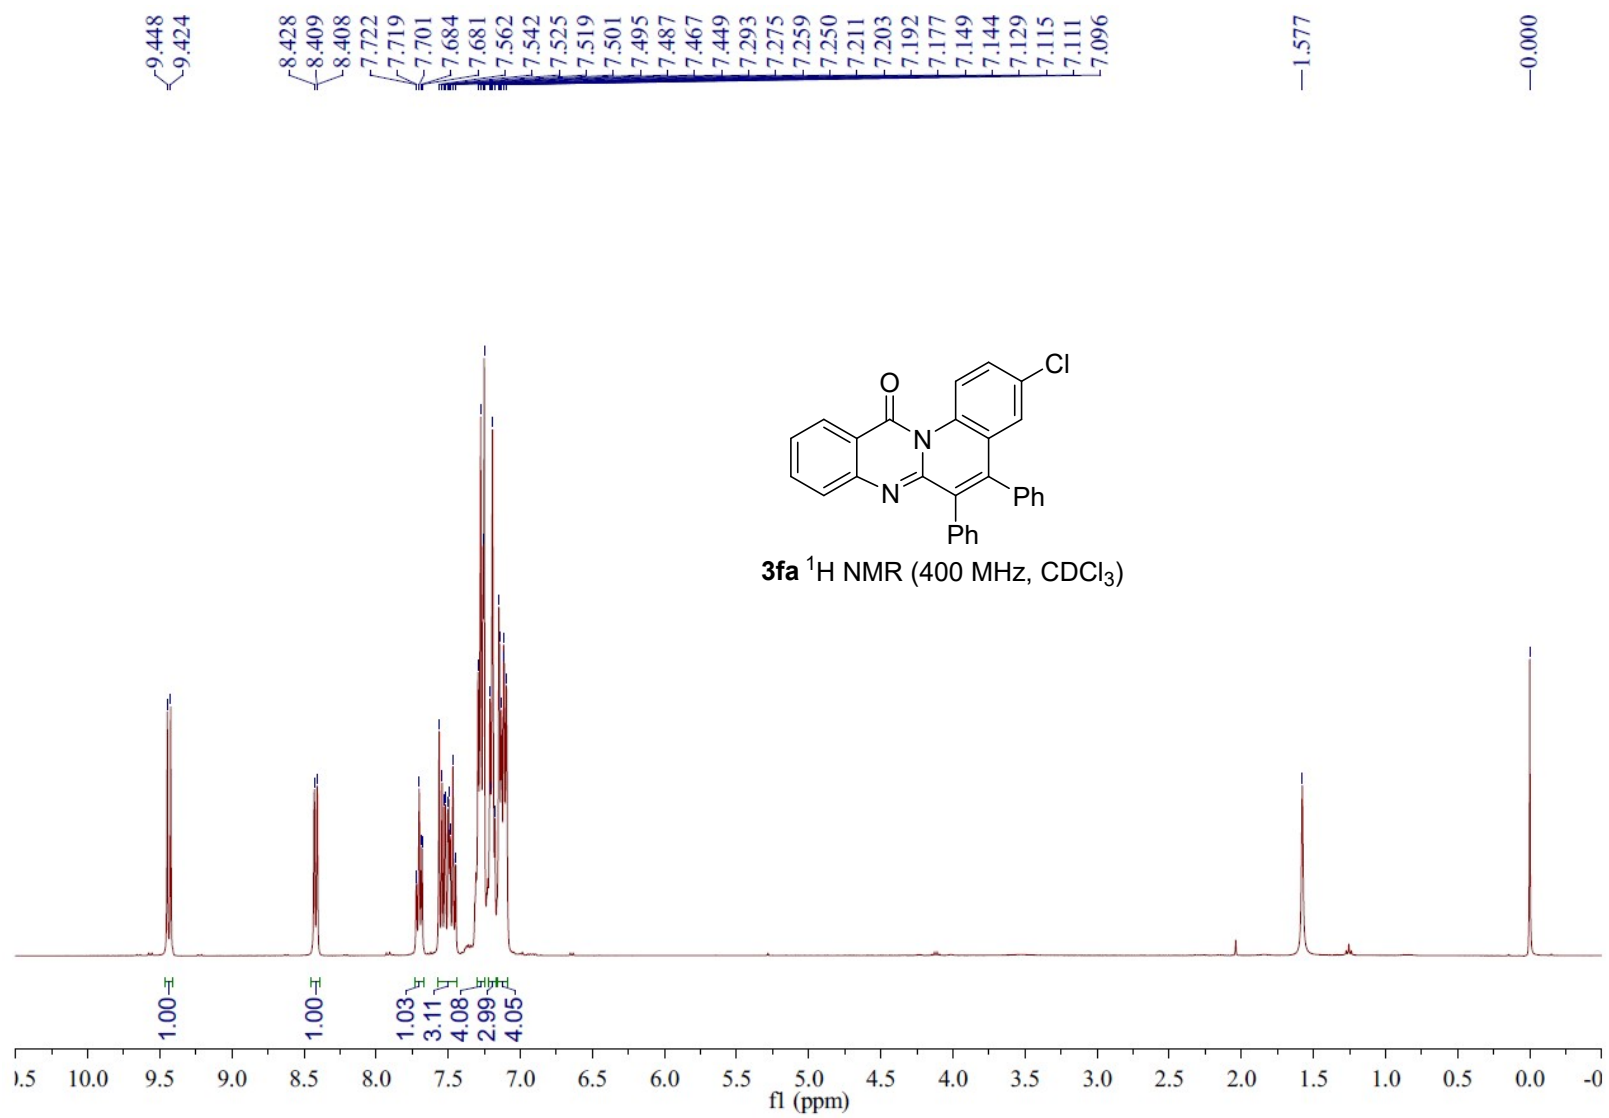

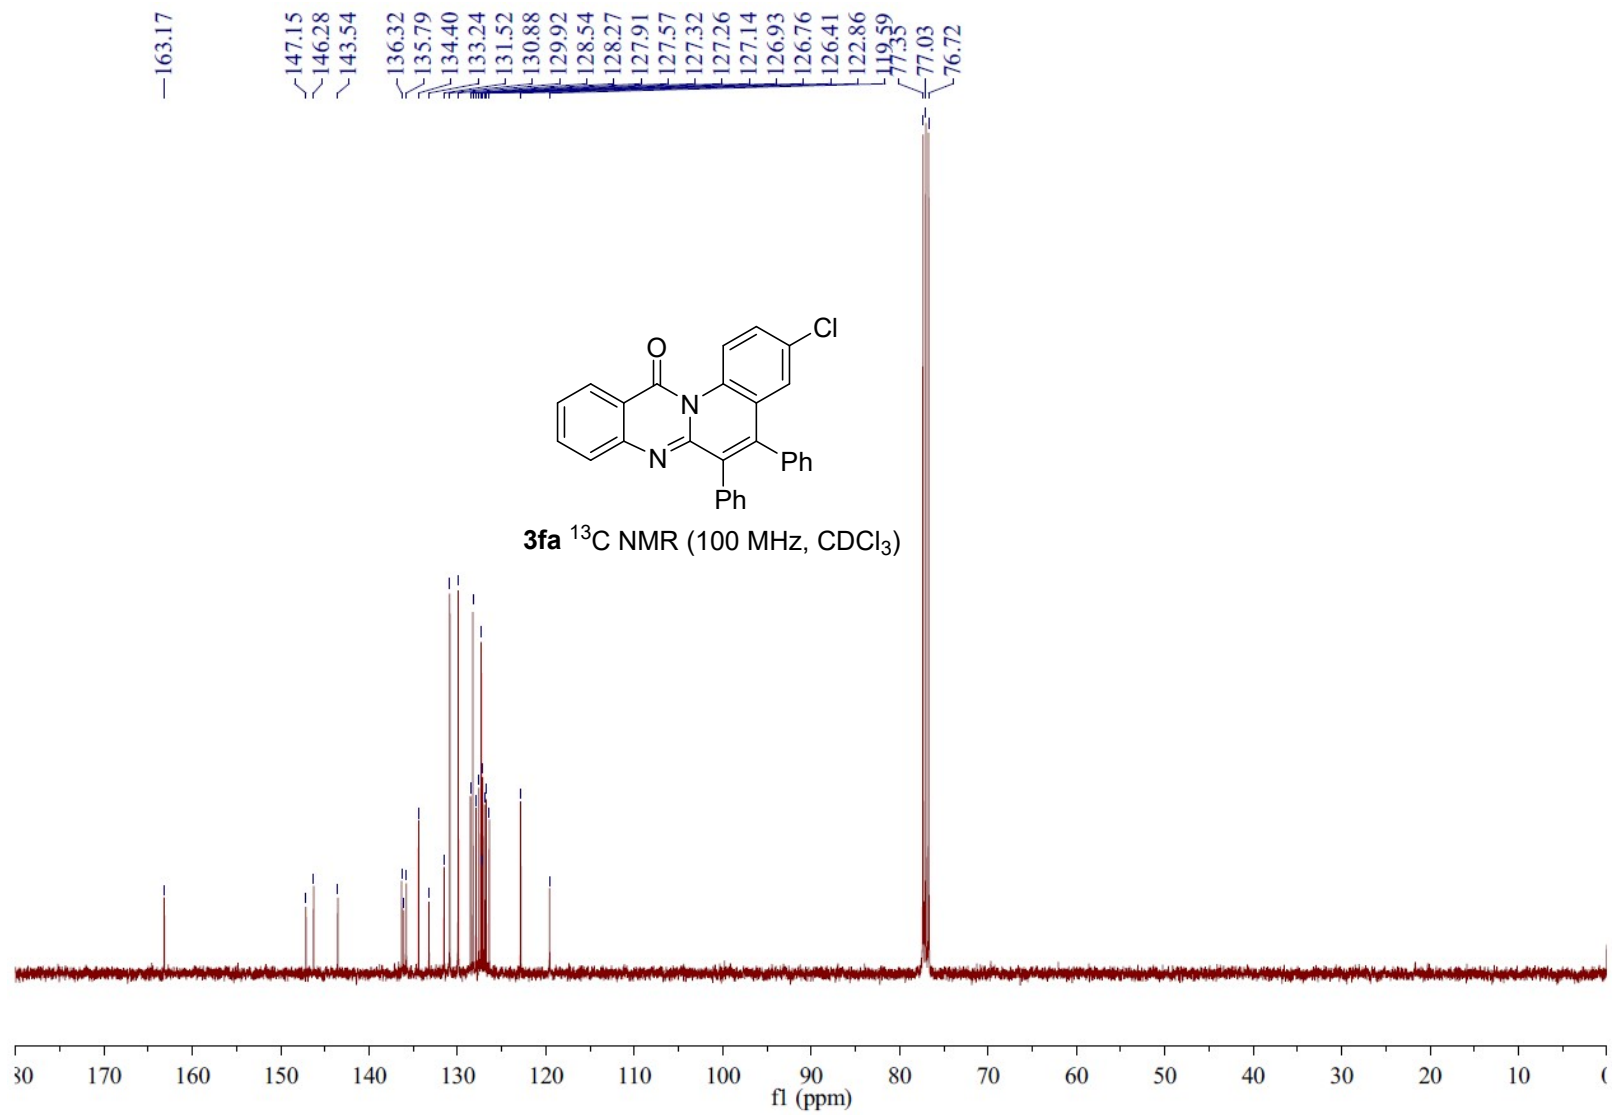

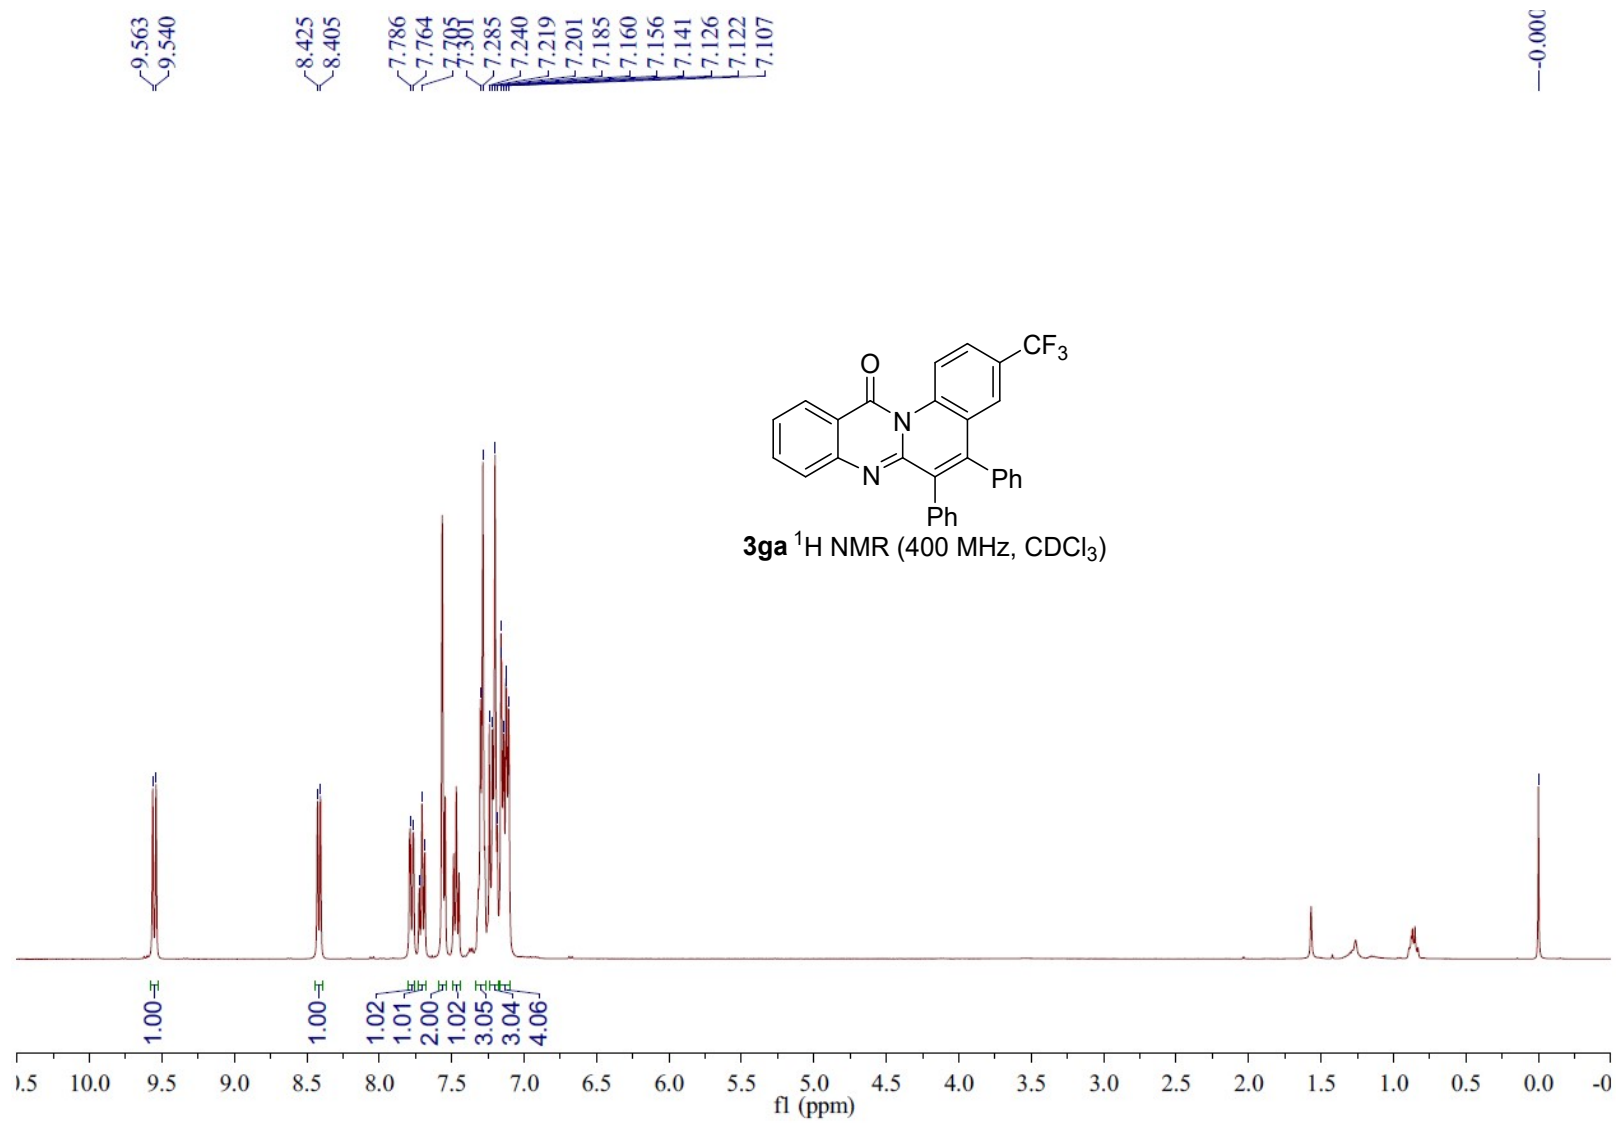

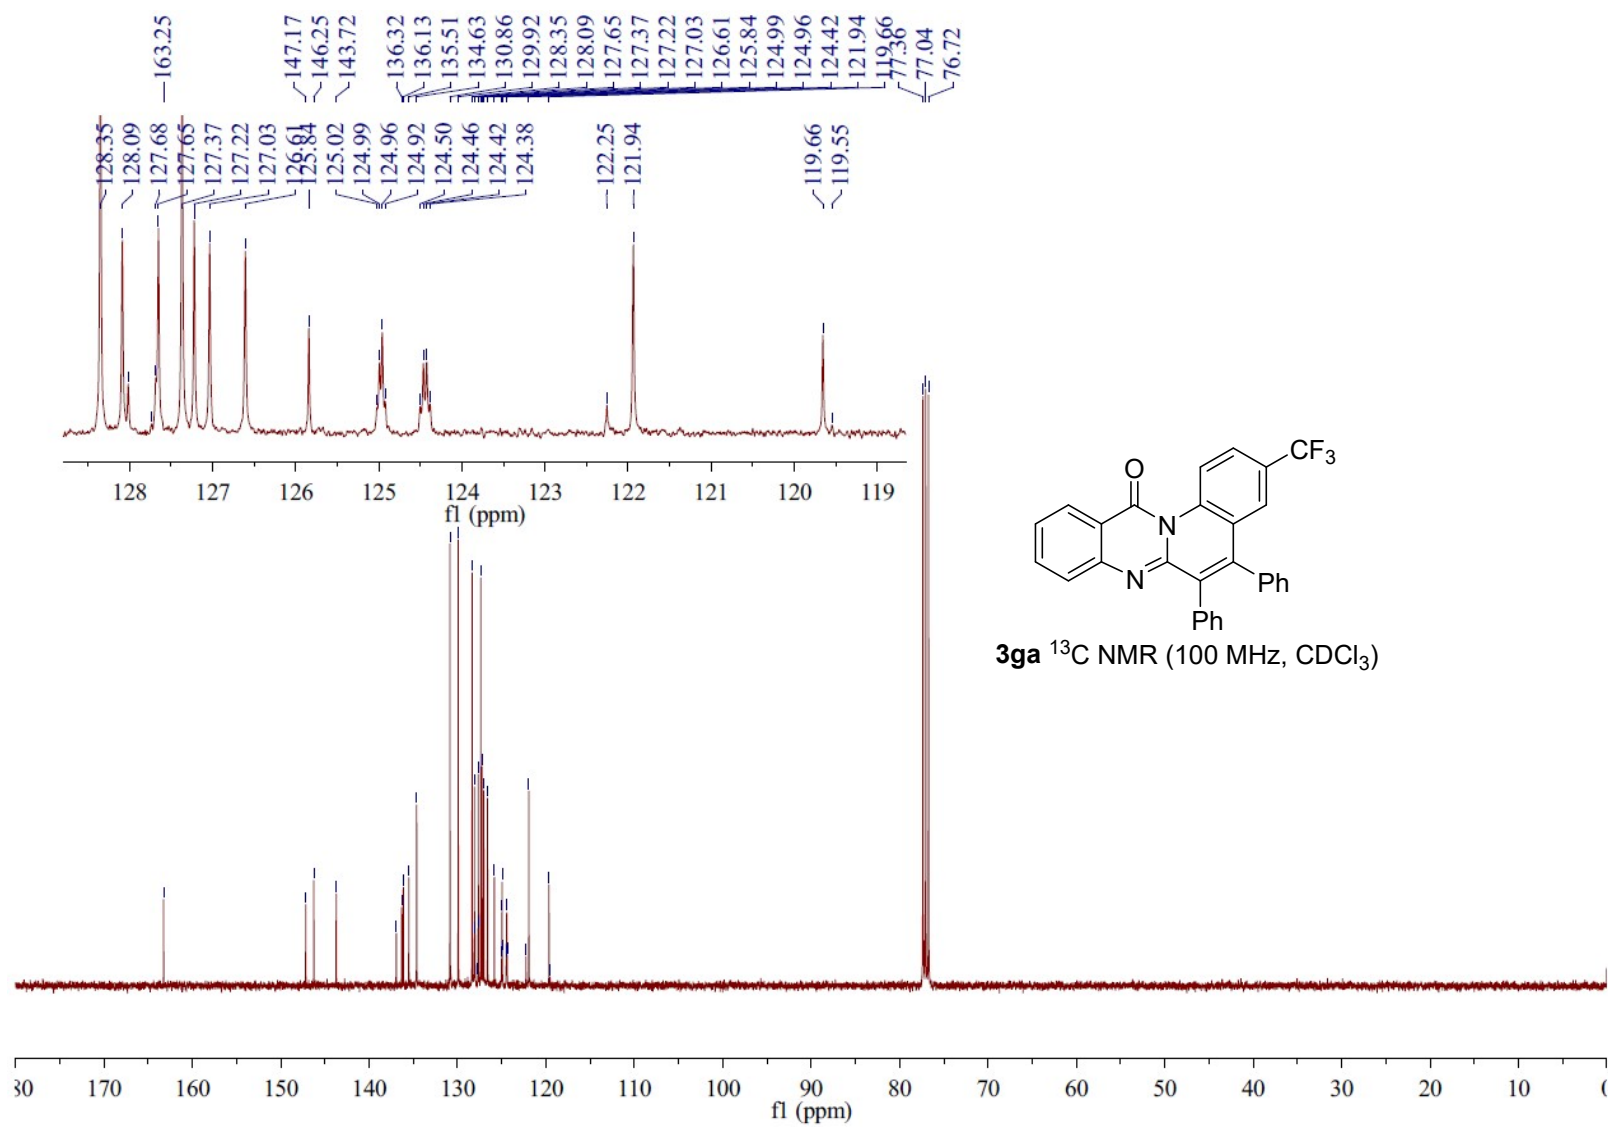

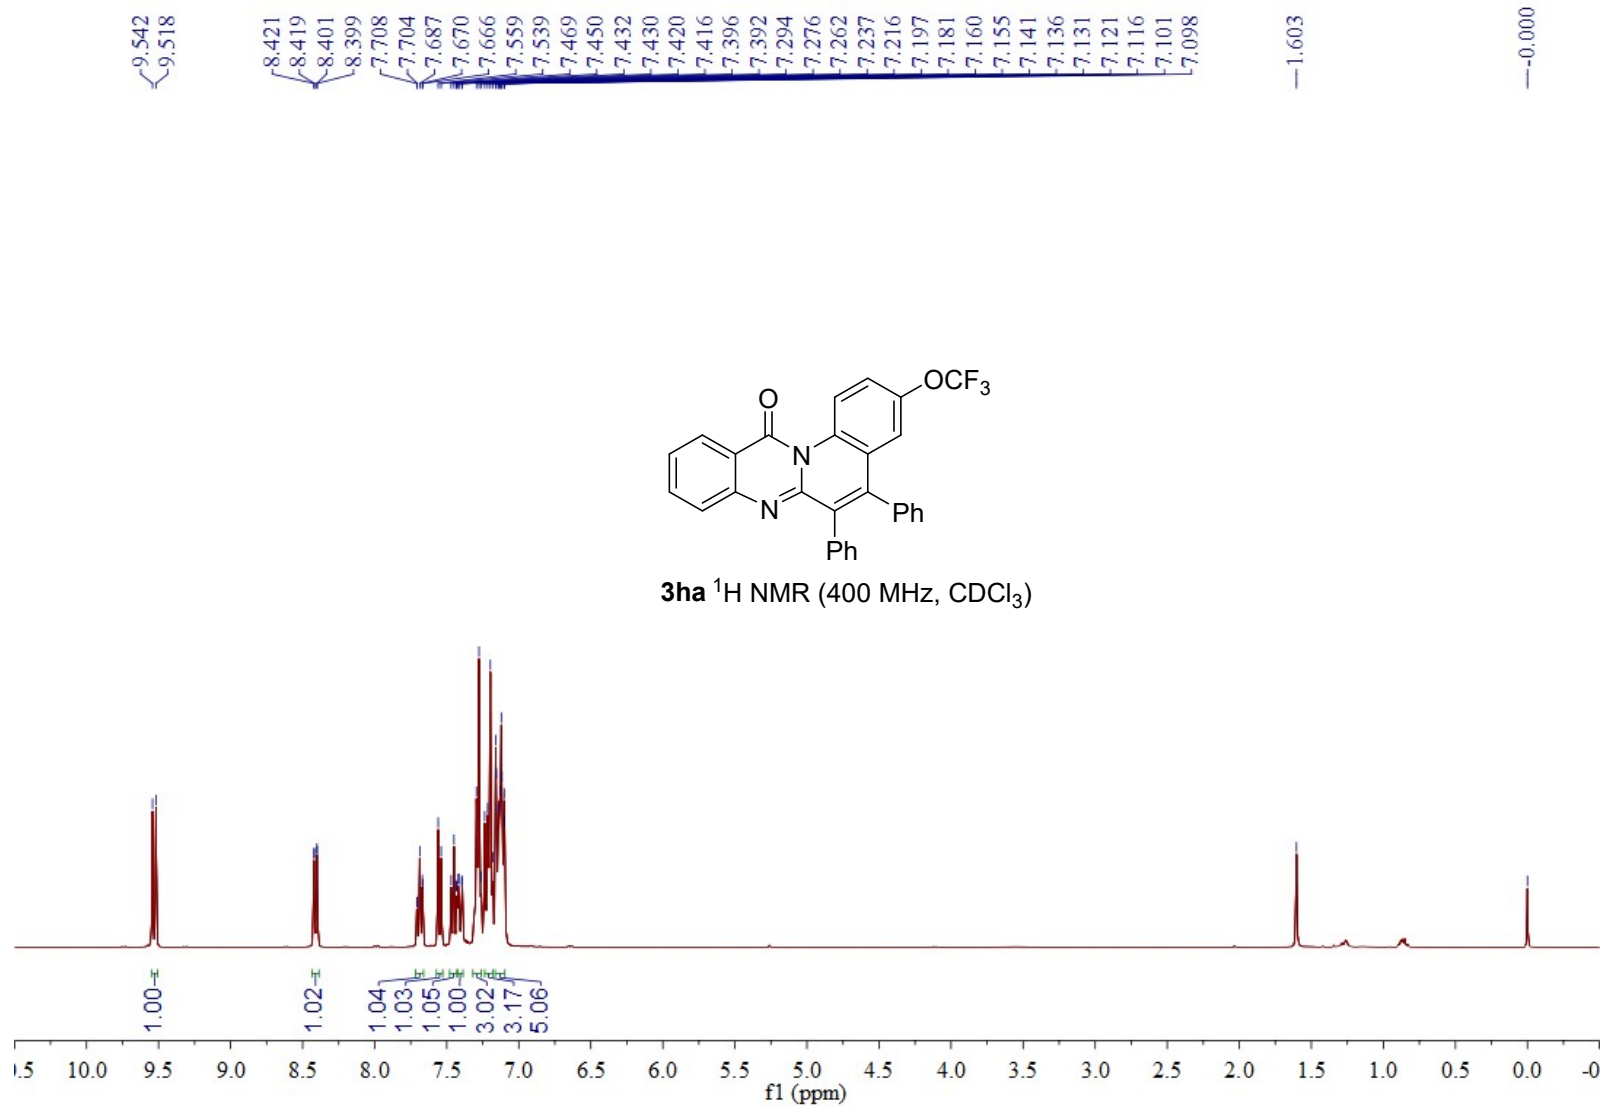



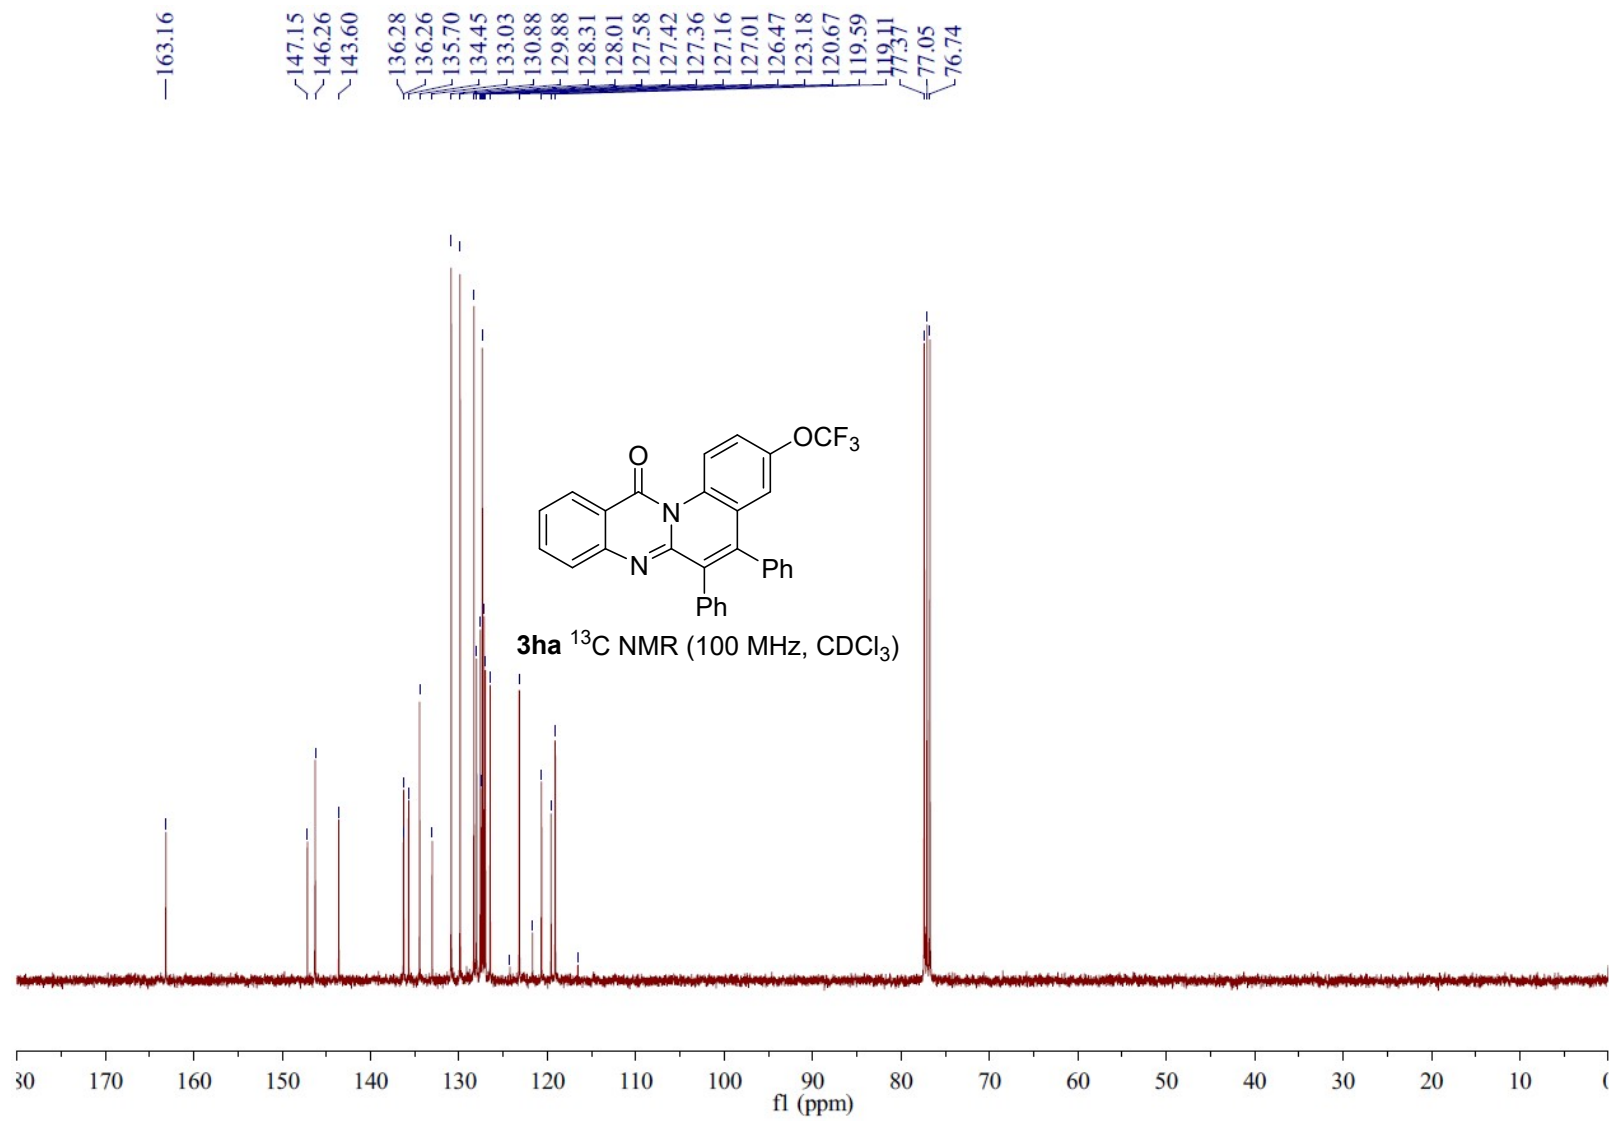

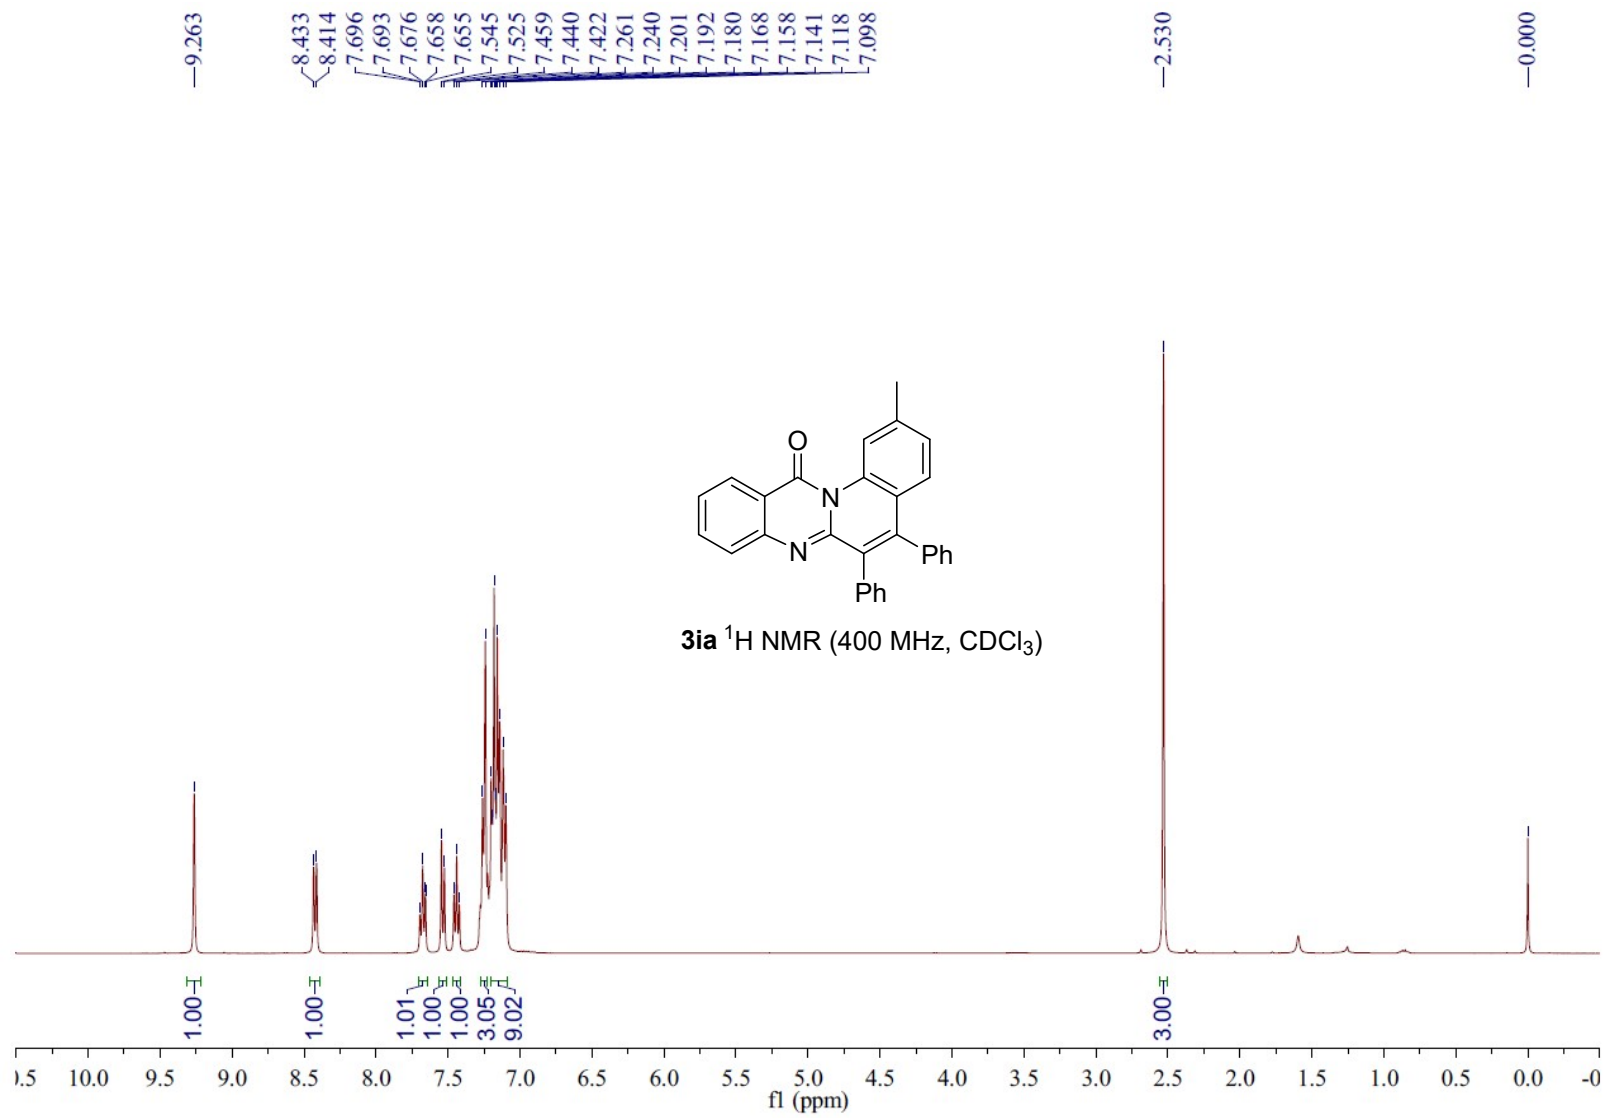

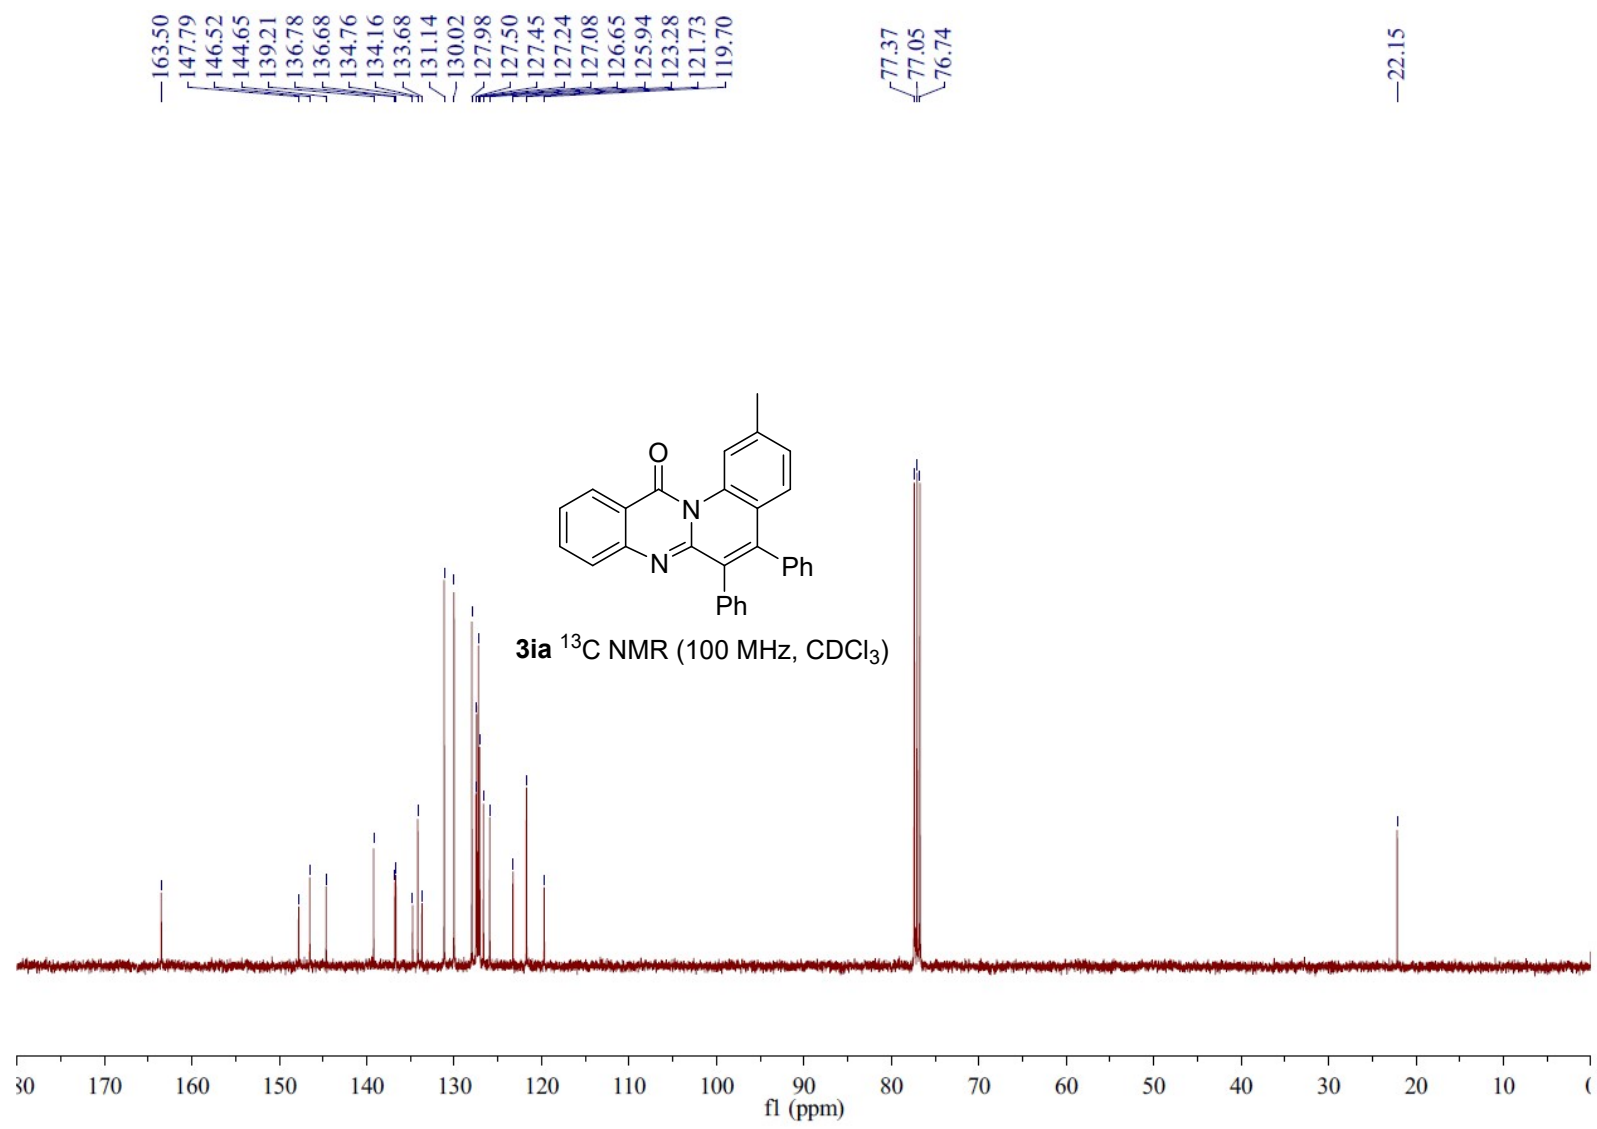

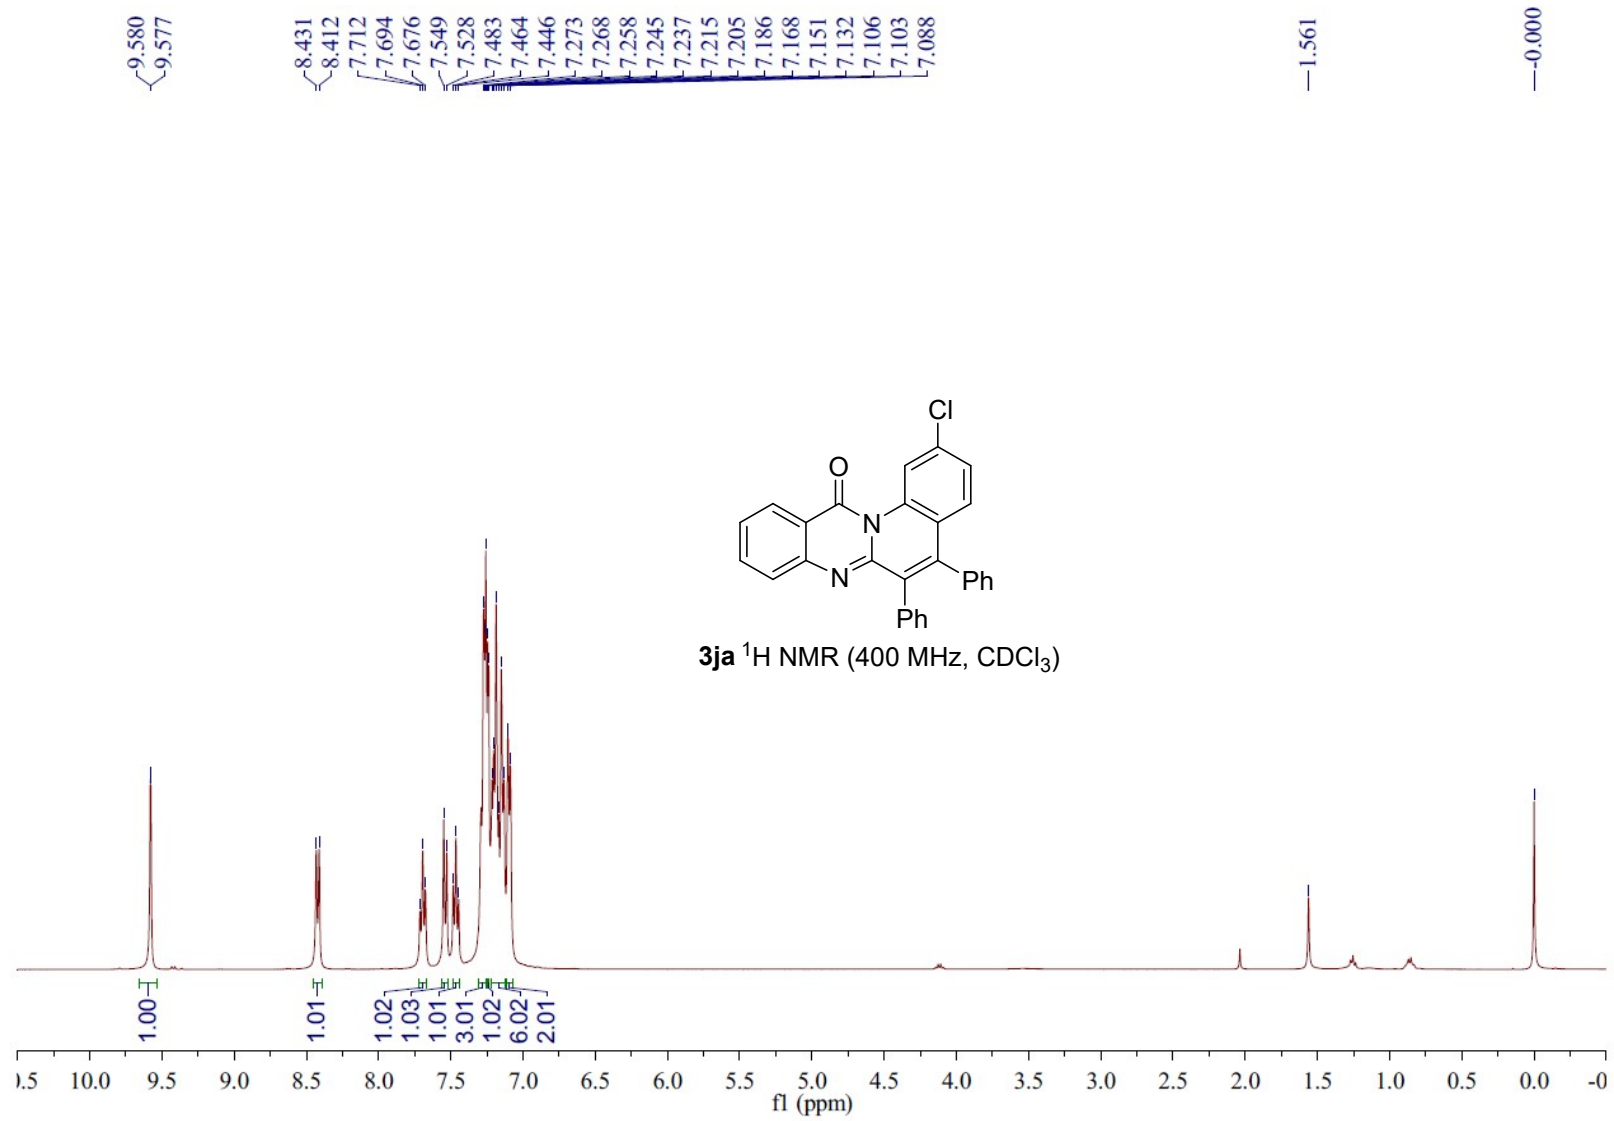

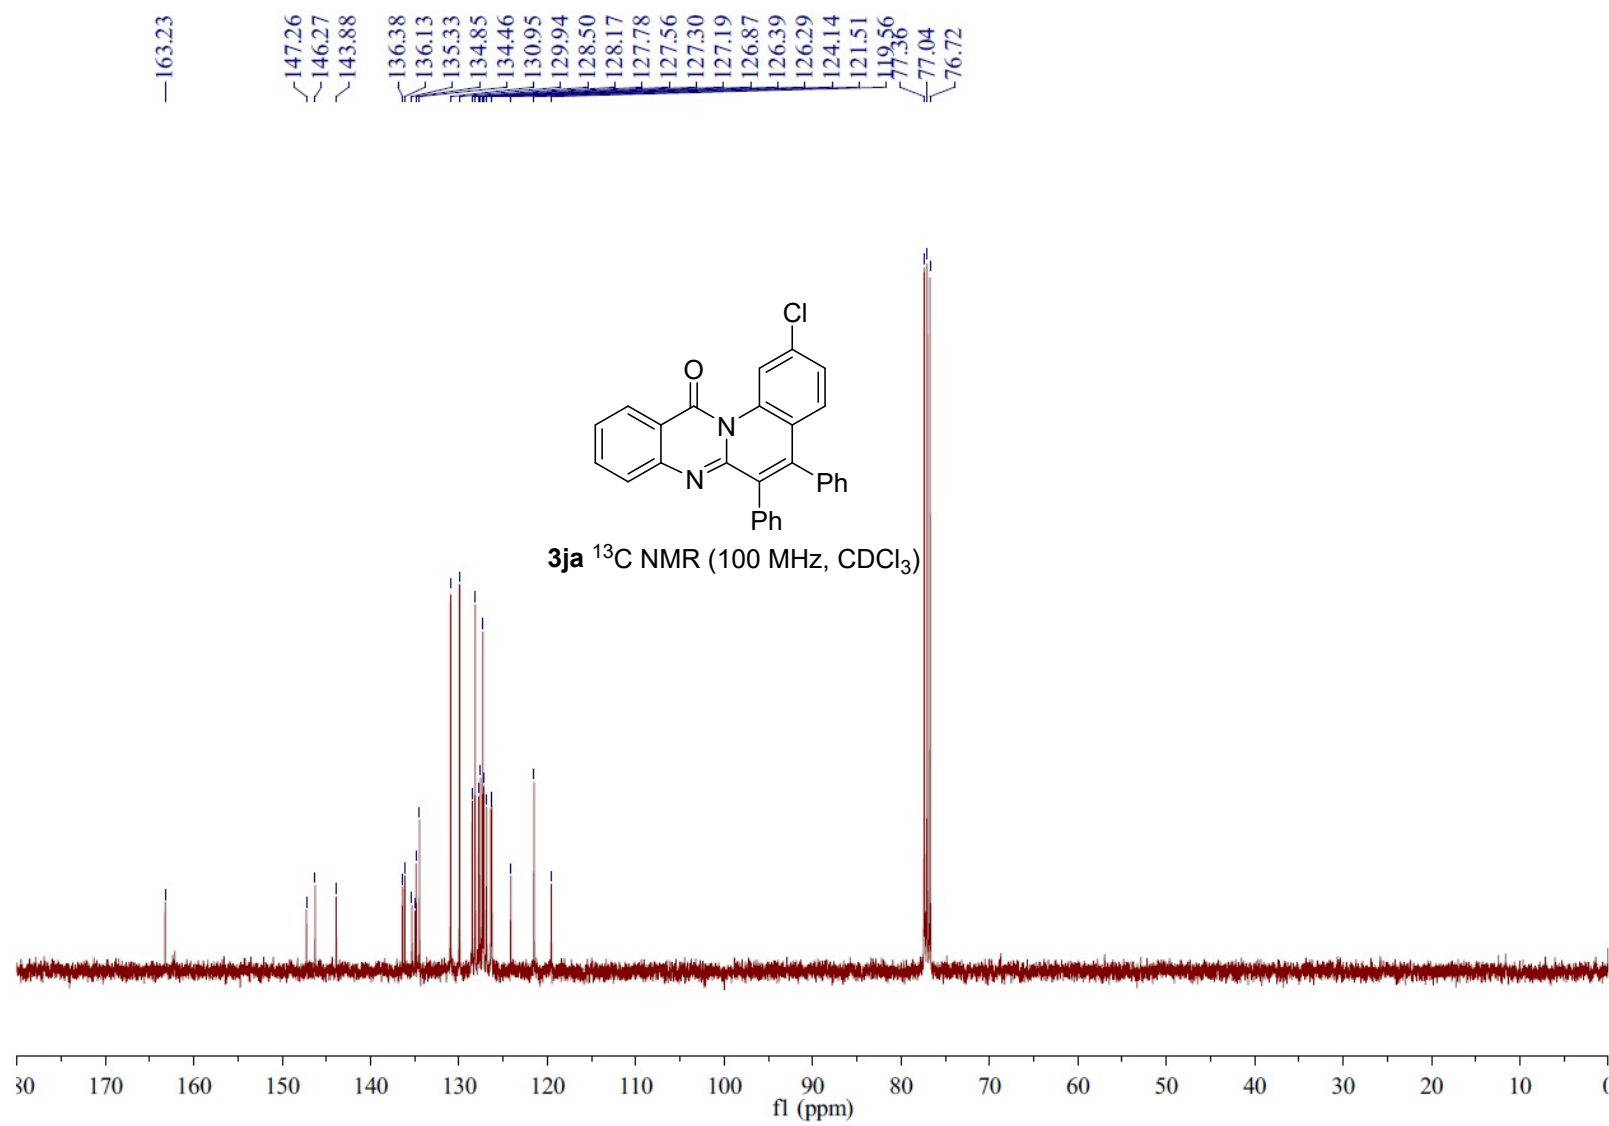

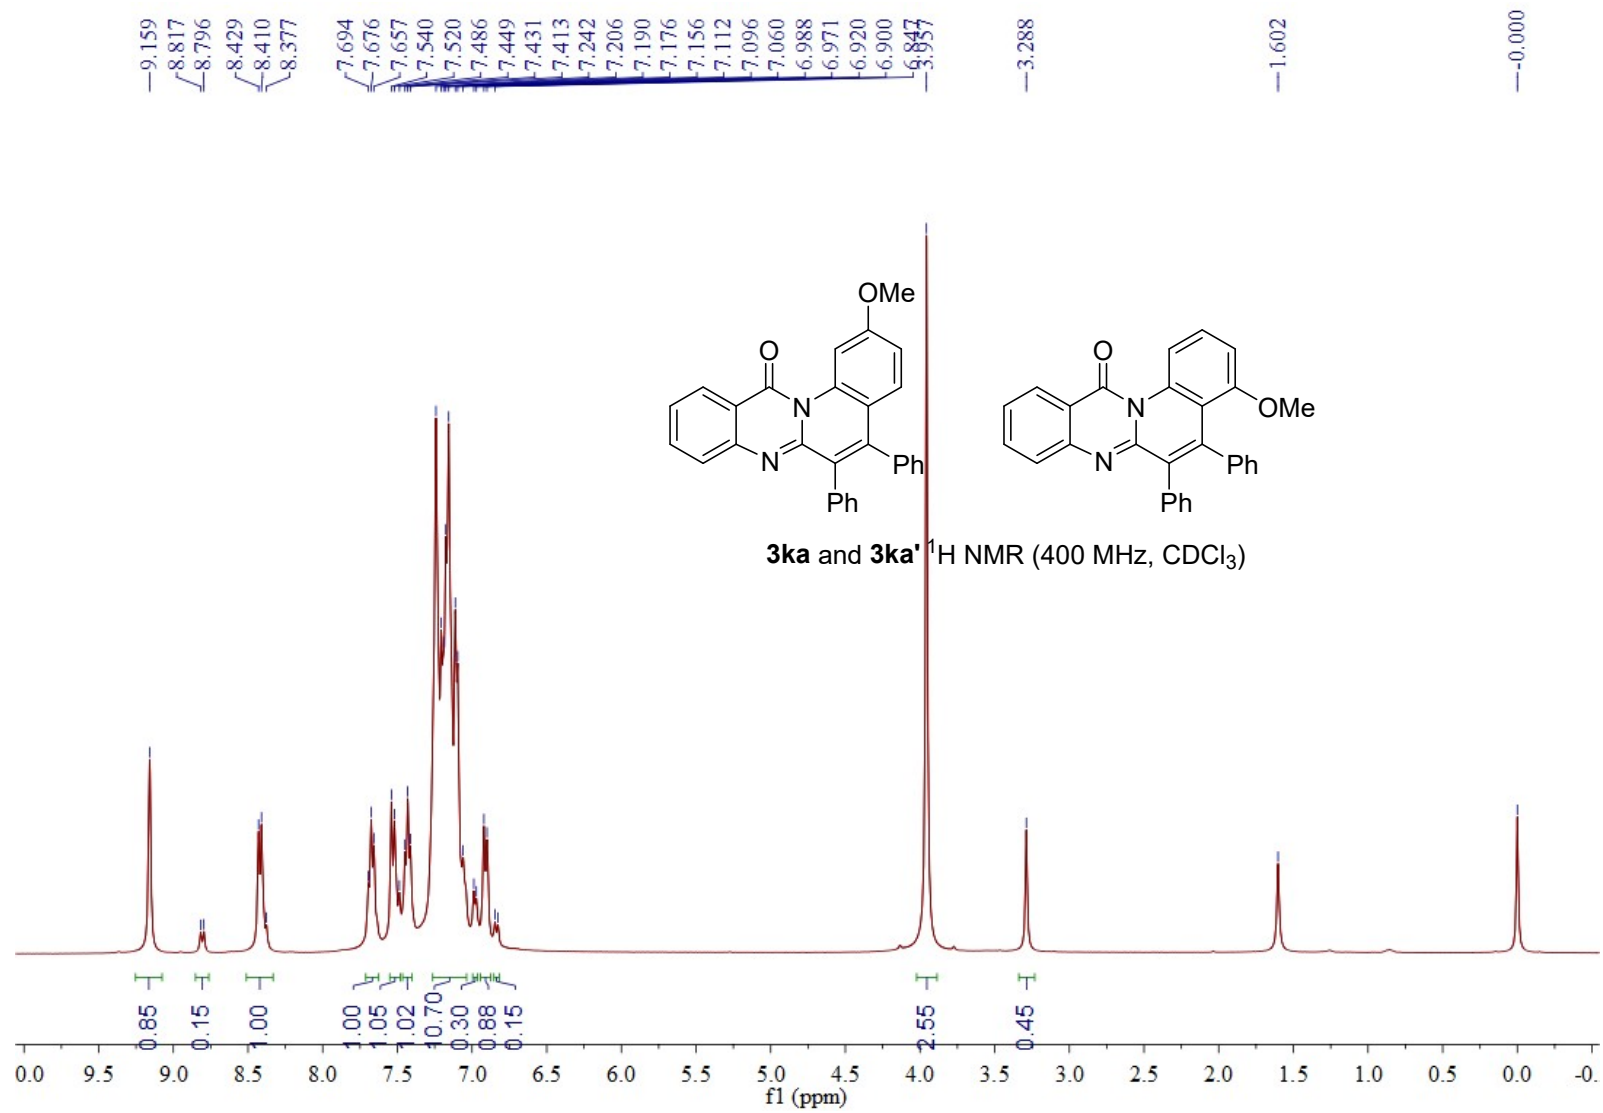

163.69  
159.82  
147.98  
146.52  
144.68  
131.25  
129.99  
127.97  
127.42  
127.23  
119.49  
119.29  
114.04  
109.78  
105.91  
77.36  
77.04  
76.73  
56.00  
55.75

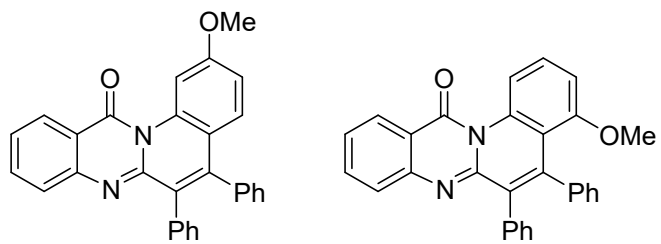

3ka and 3ka' <sup>13</sup>C NMR (100 MHz, CDCl<sub>3</sub>)

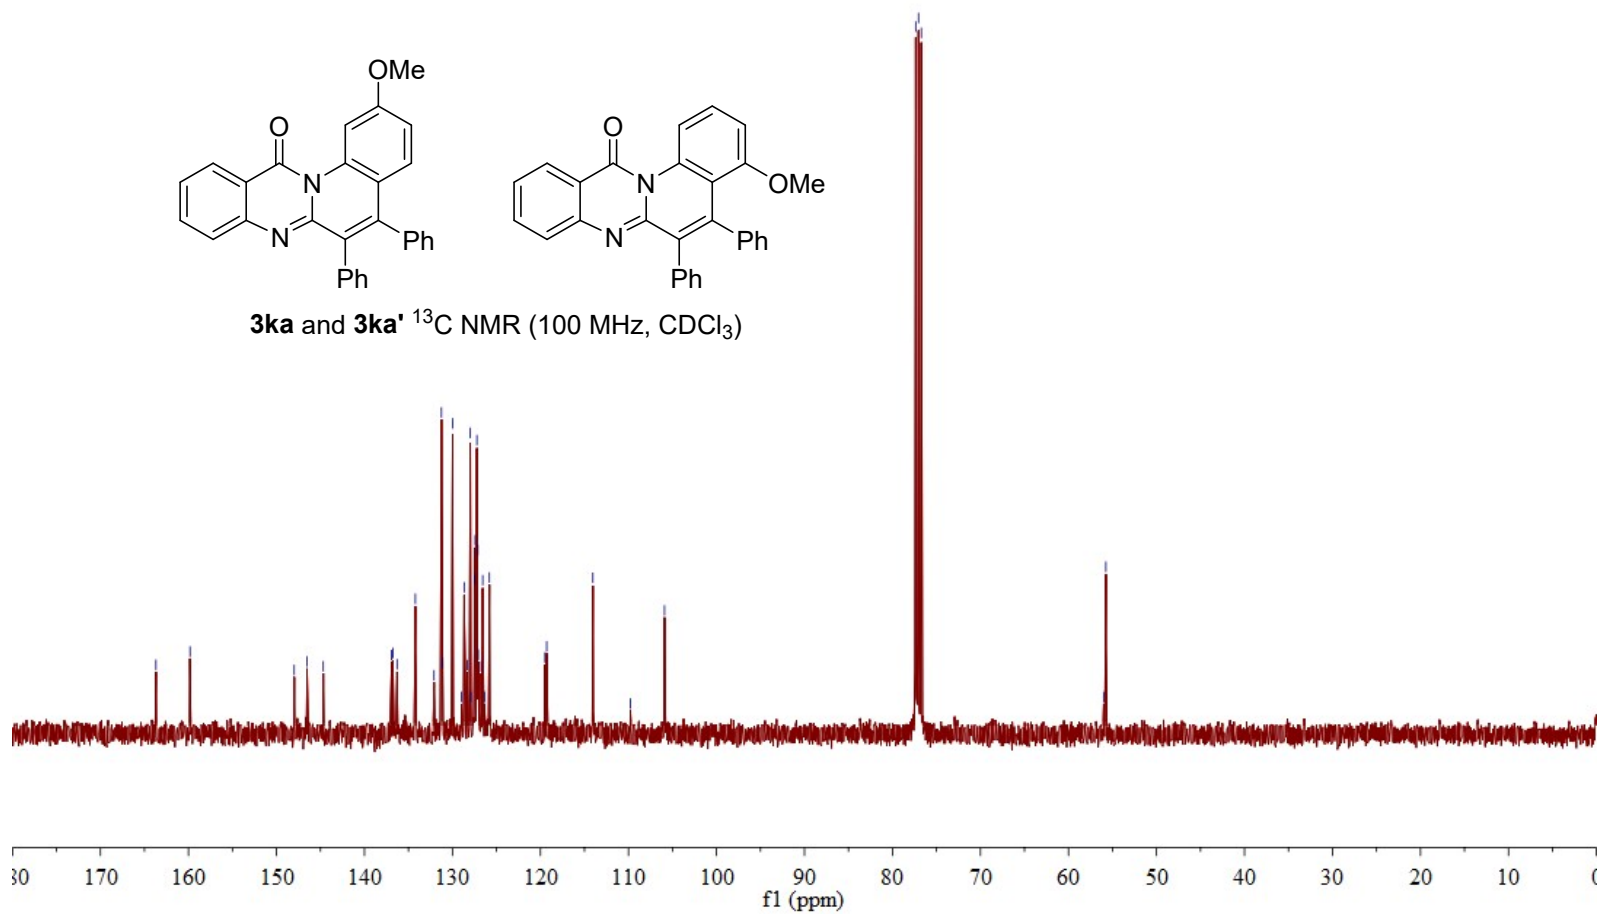

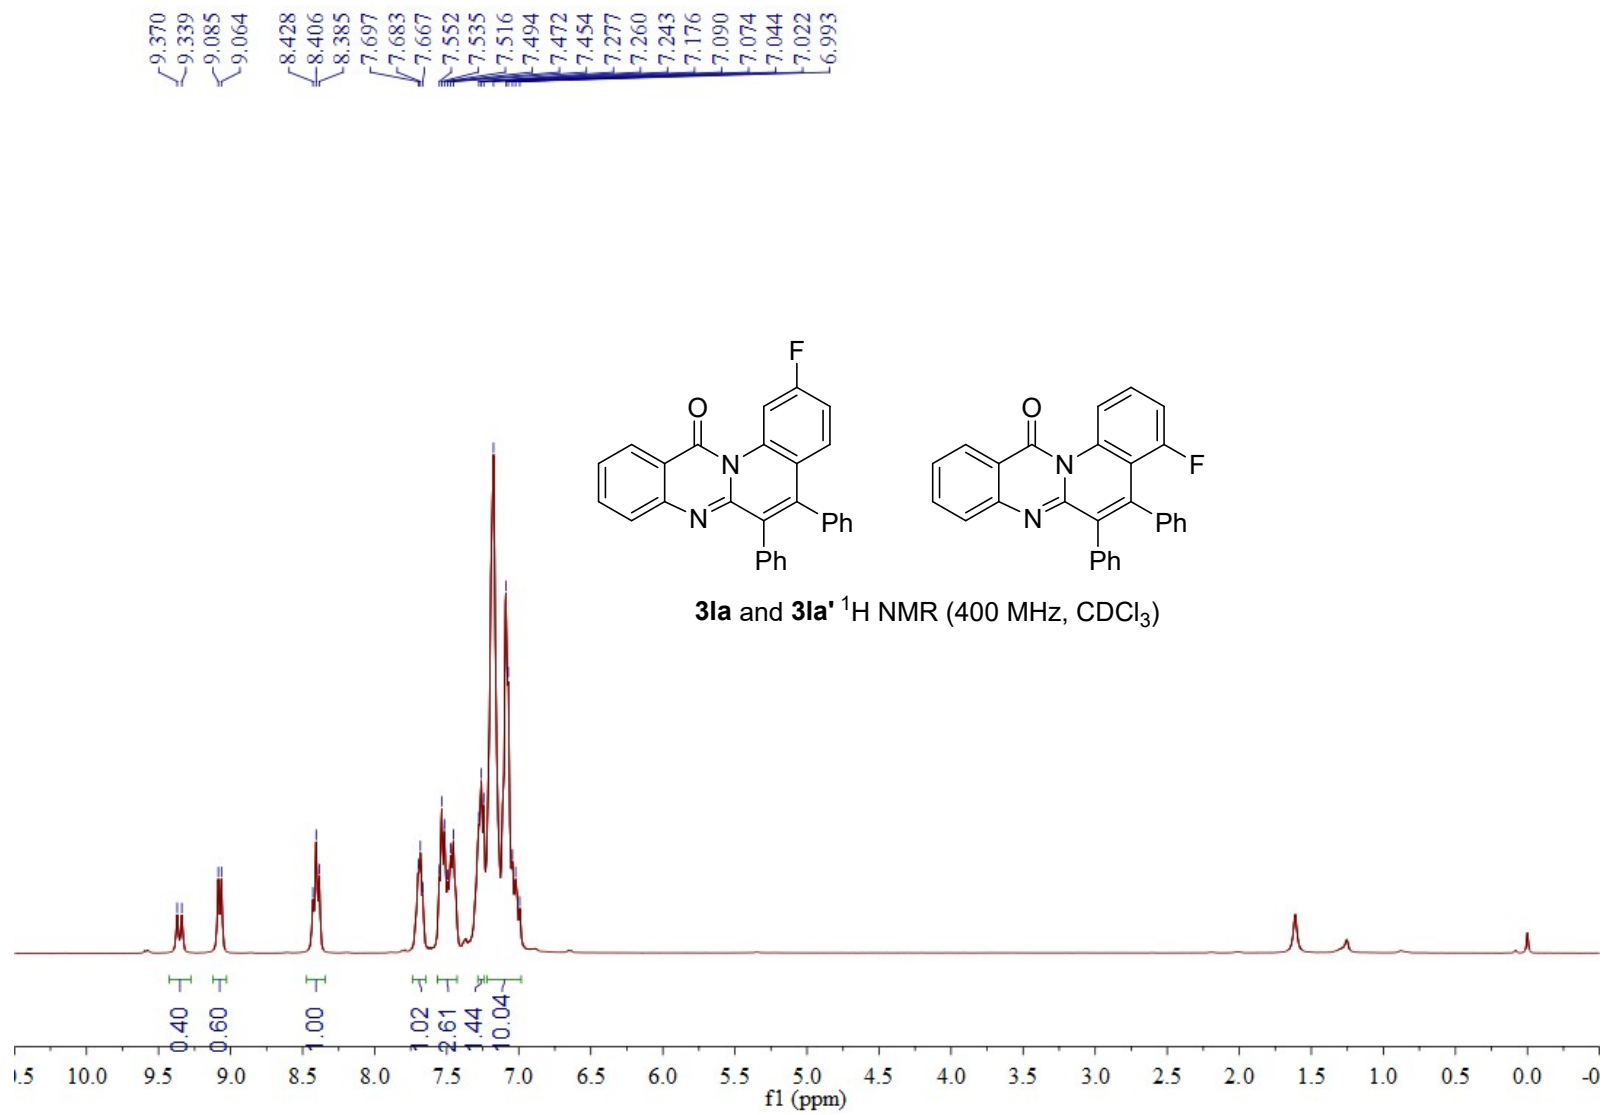



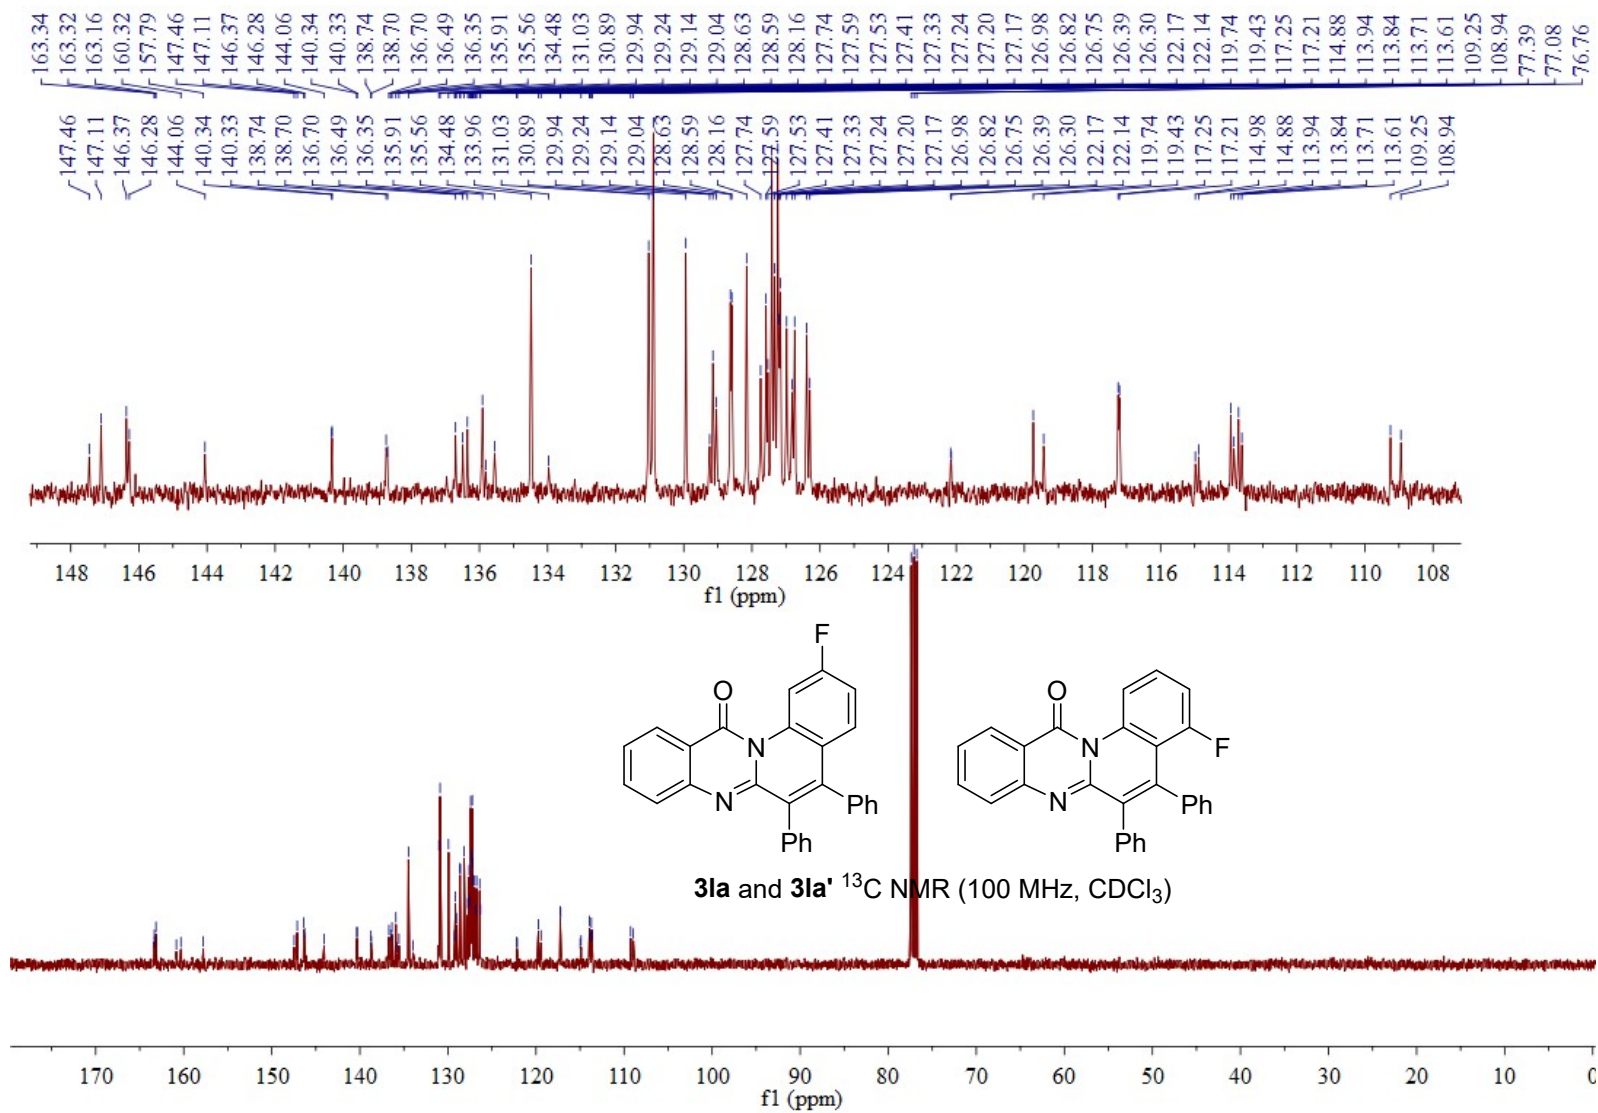

8.311  
8.309  
8.292  
8.290  
7.660  
7.642  
7.639  
7.564  
7.544  
7.447  
7.445  
7.427  
7.409  
7.298  
7.278  
7.257  
7.249  
7.233  
7.216  
7.181  
7.157  
7.137  
6.840  
6.838  
6.820  
6.819

—1.589

—0.000

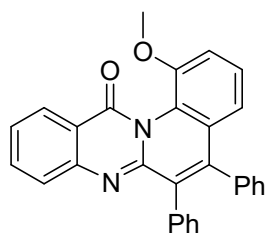

3ma <sup>1</sup>H NMR (400 MHz, CDCl<sub>3</sub>)

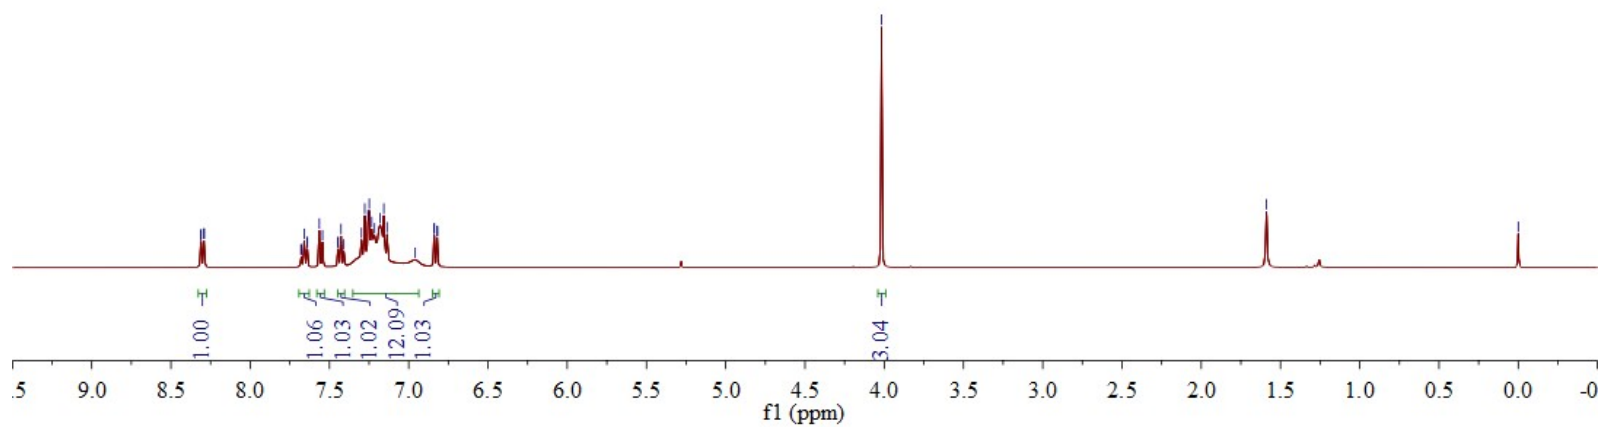

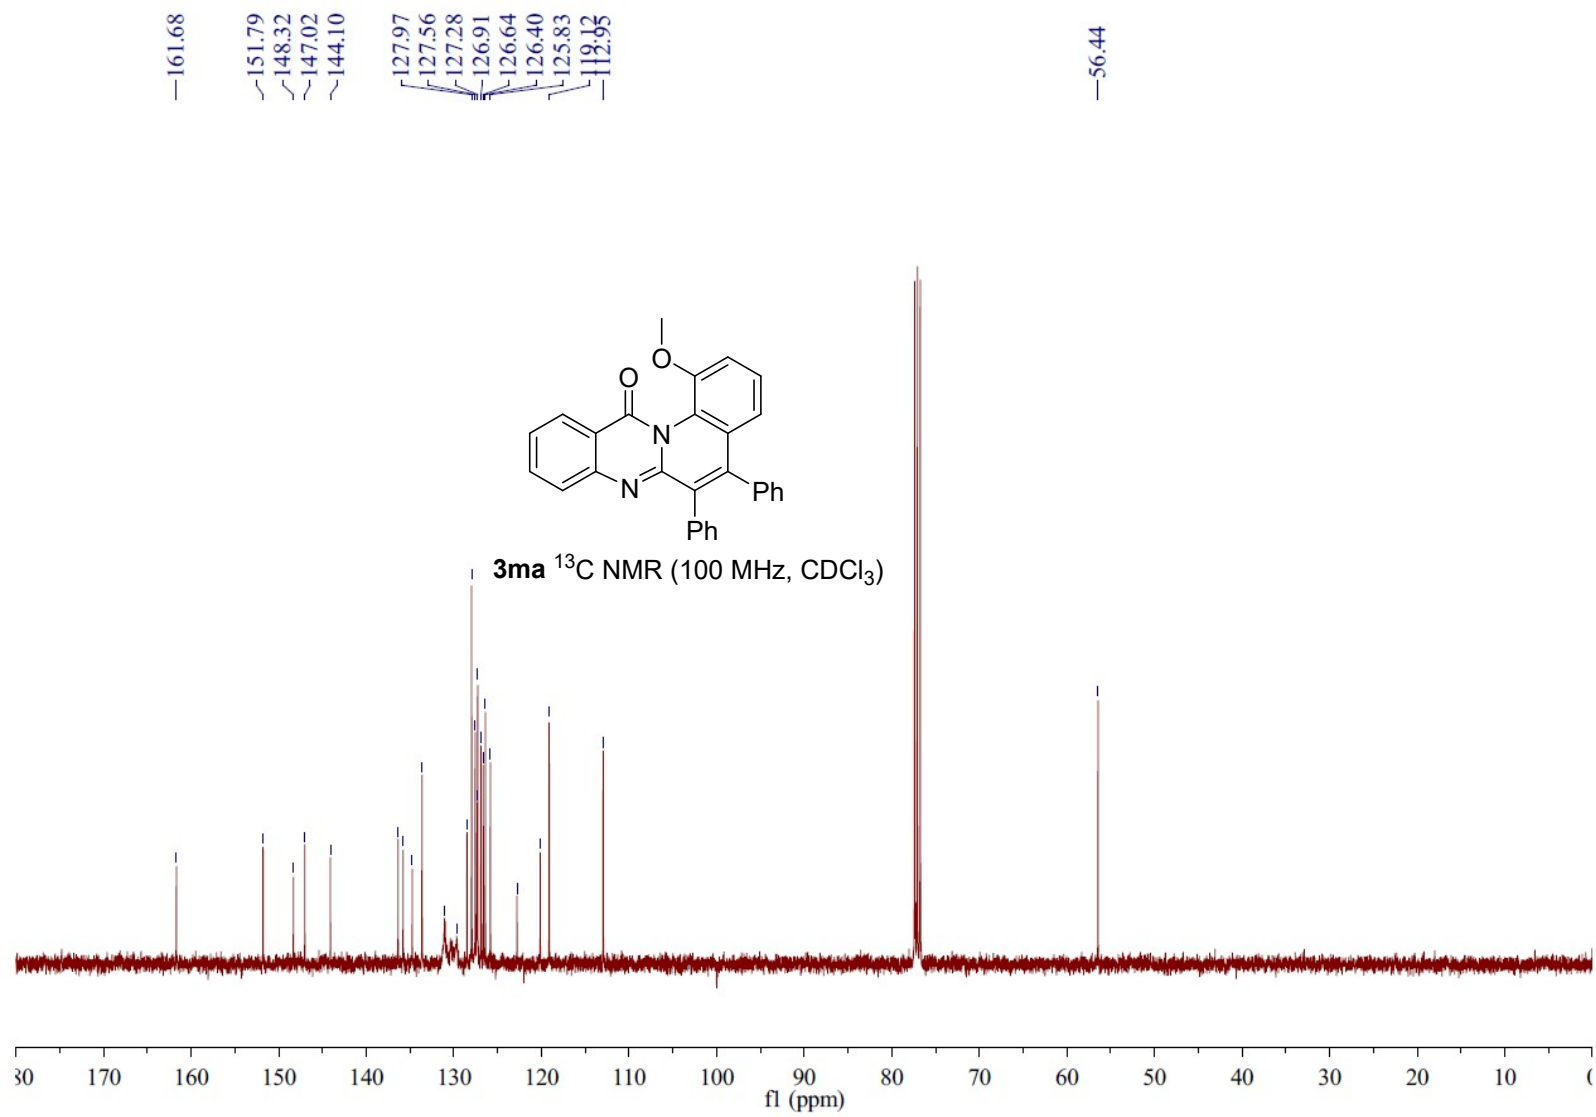

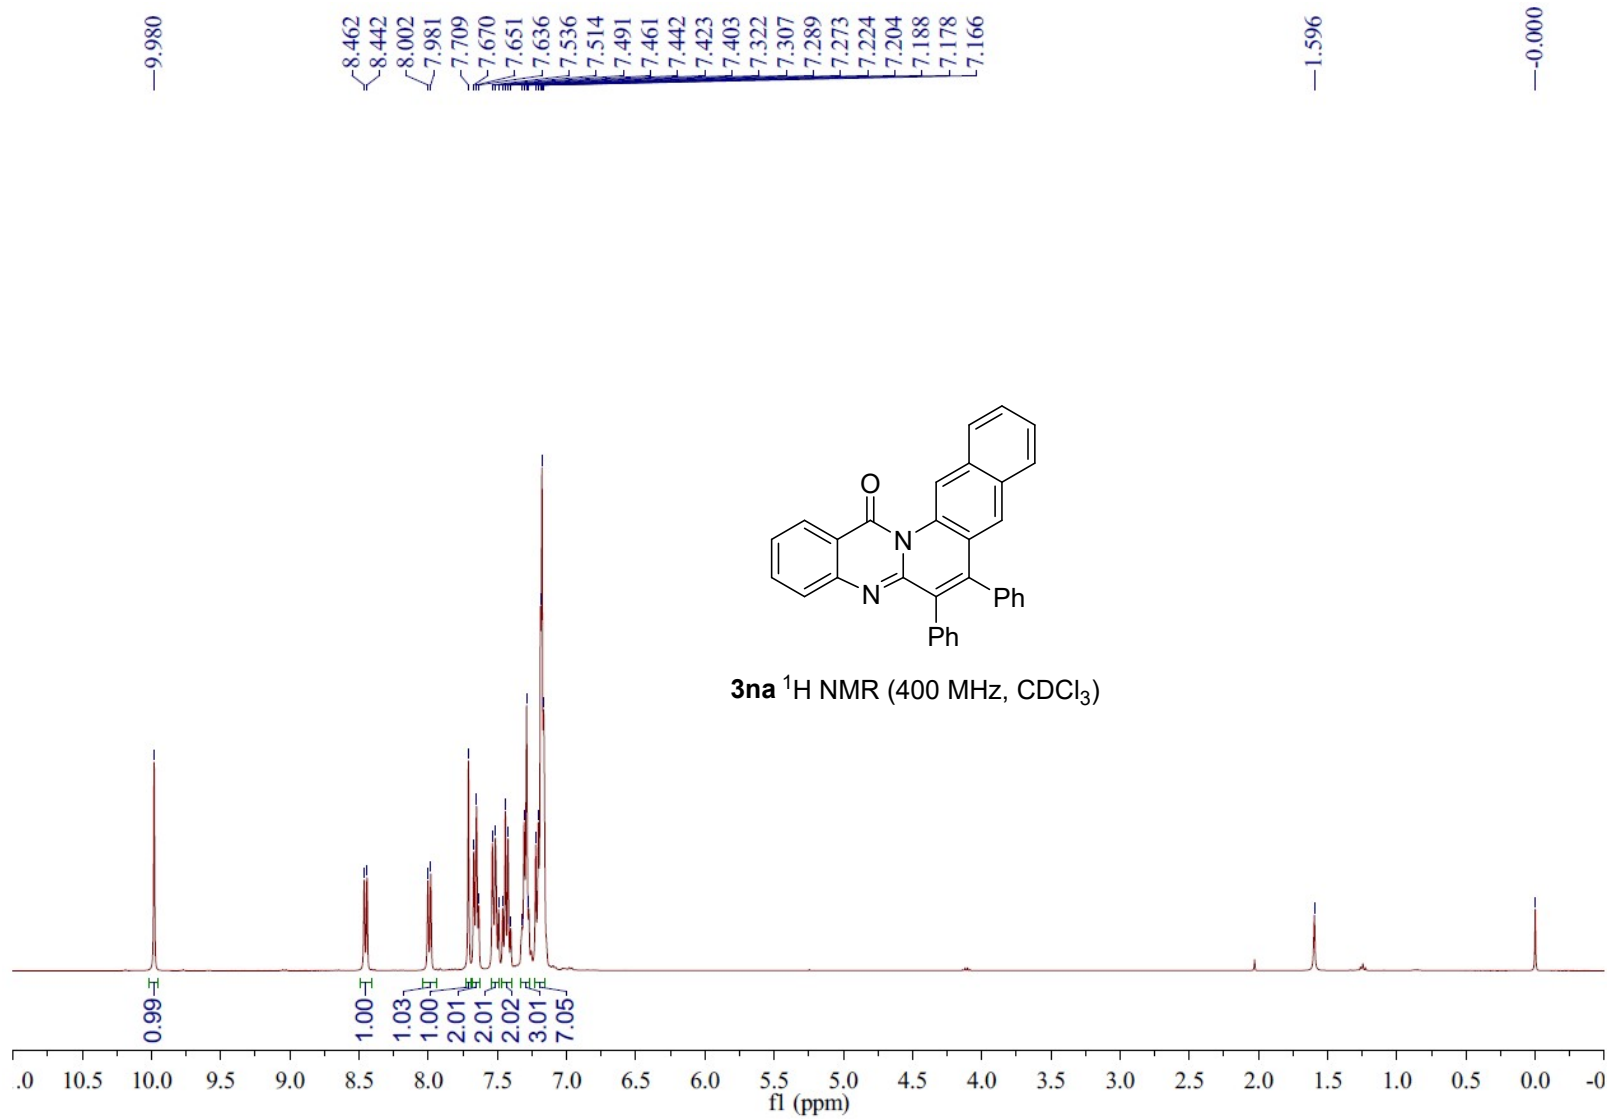

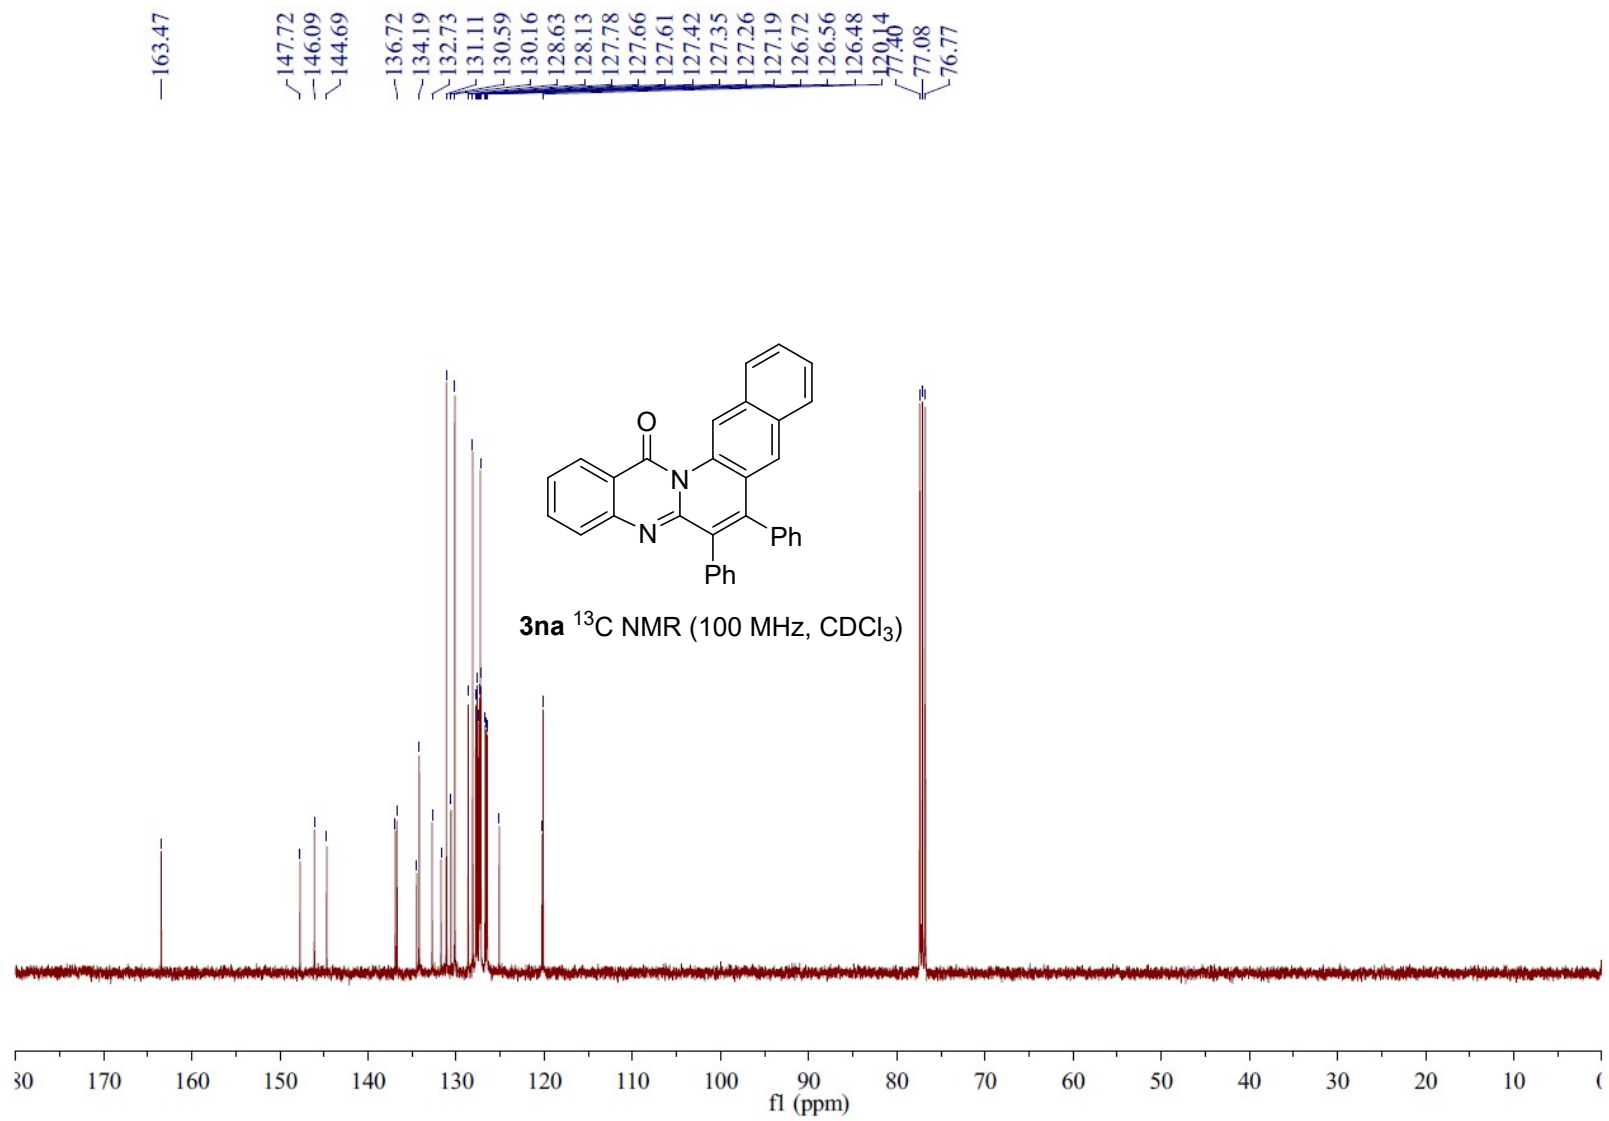

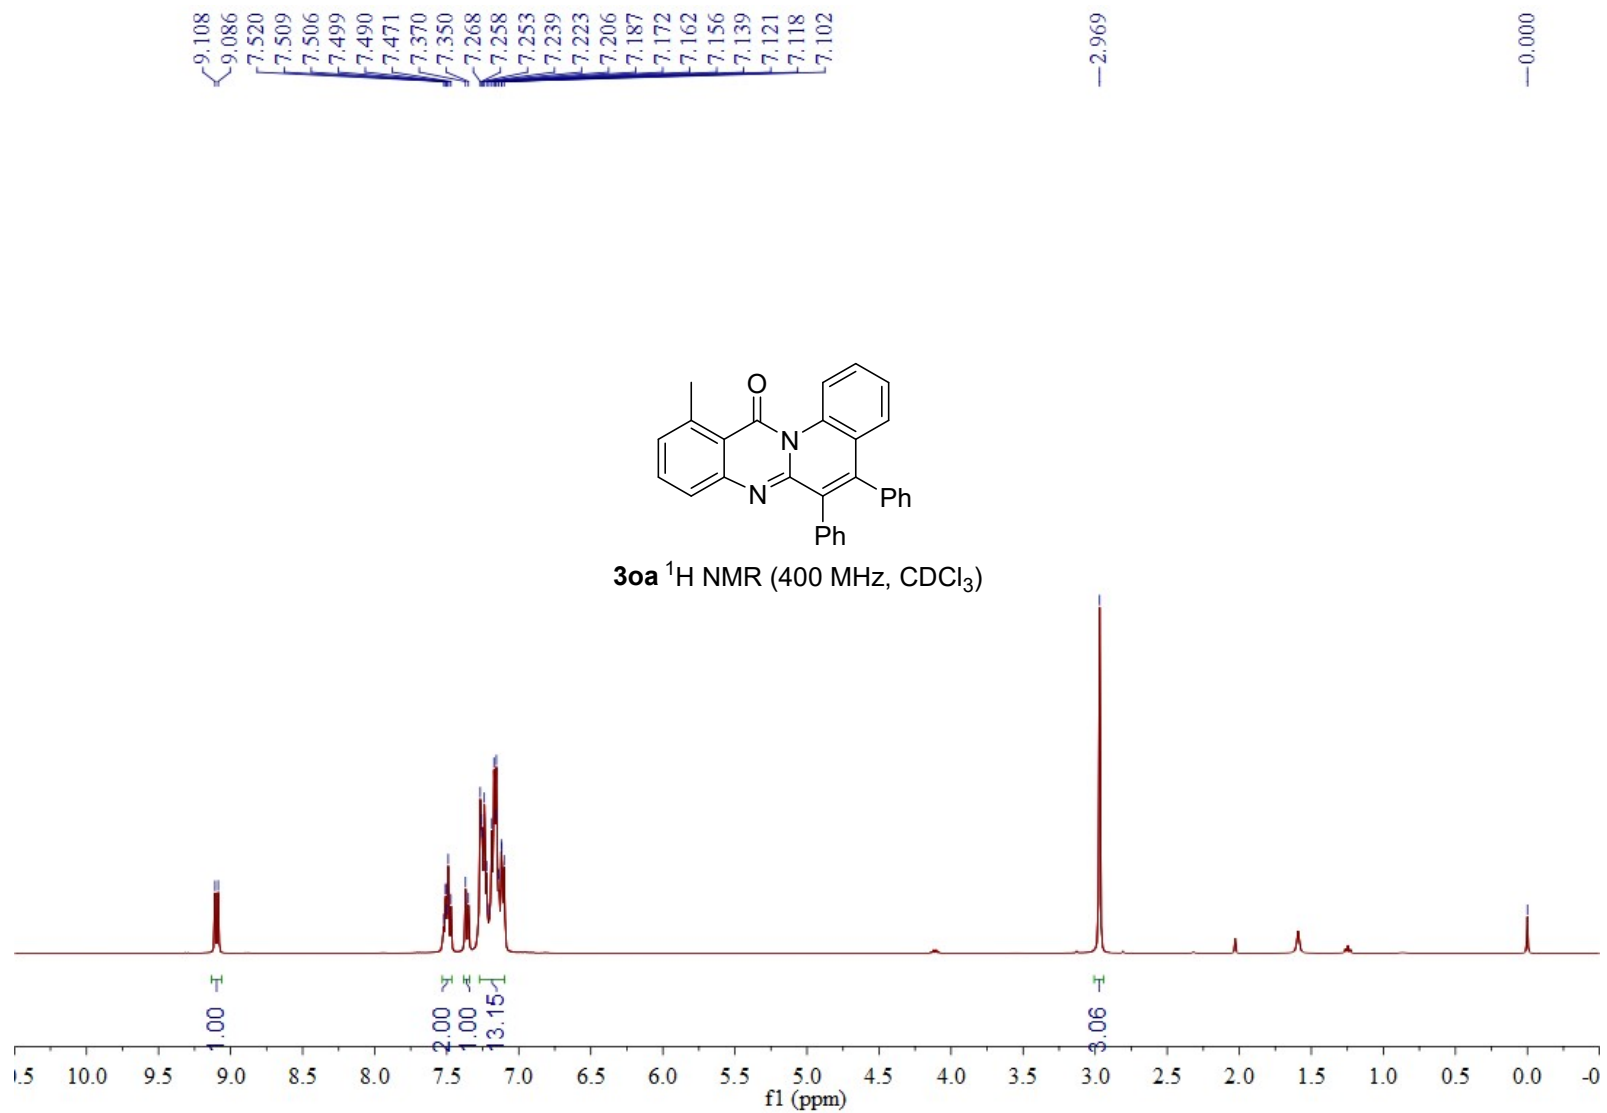

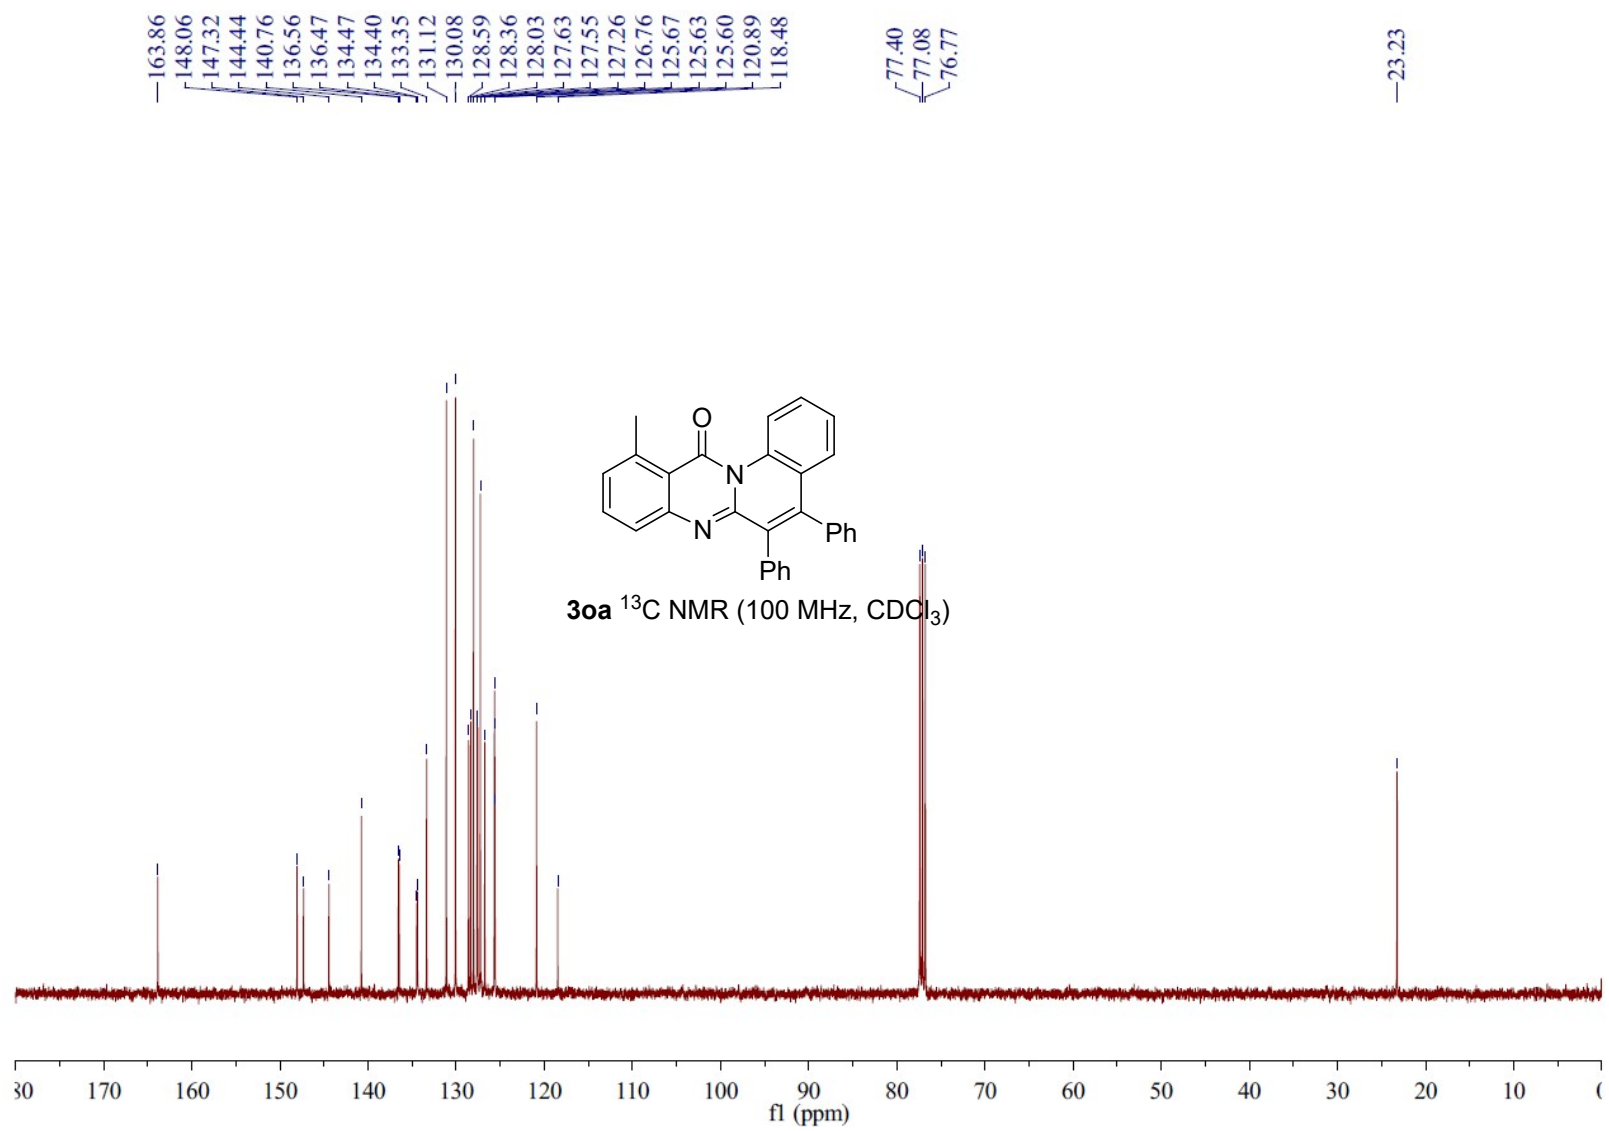

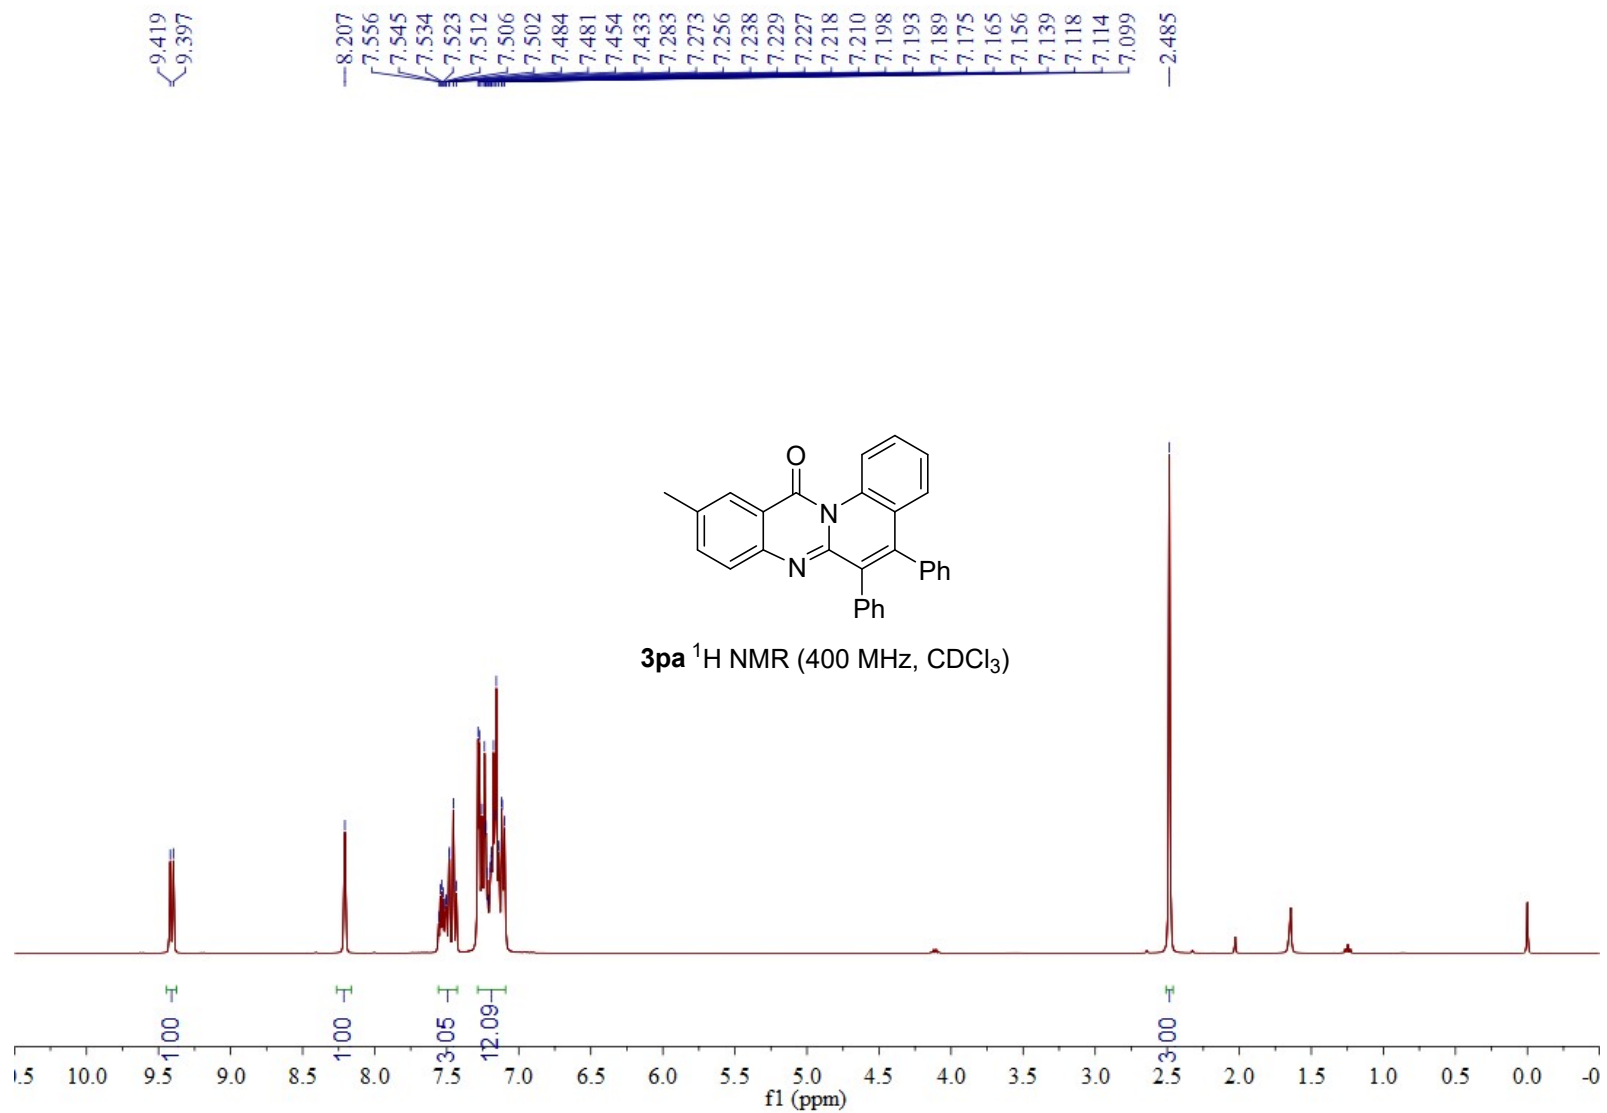



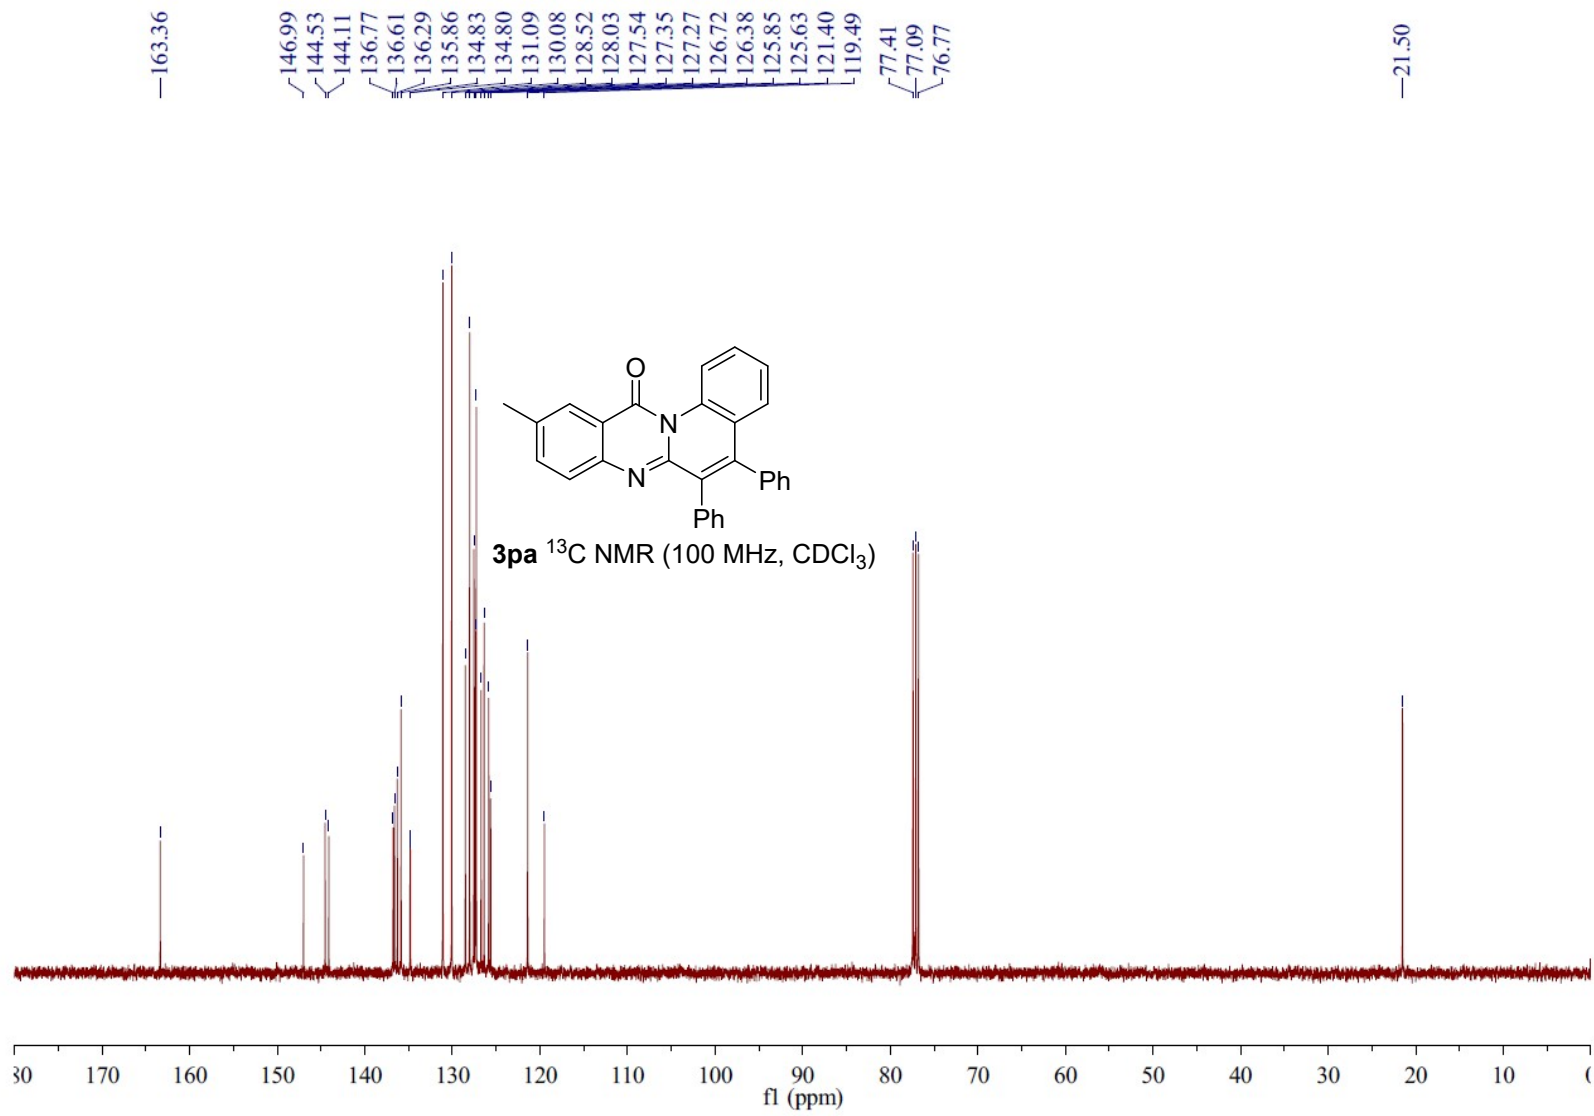

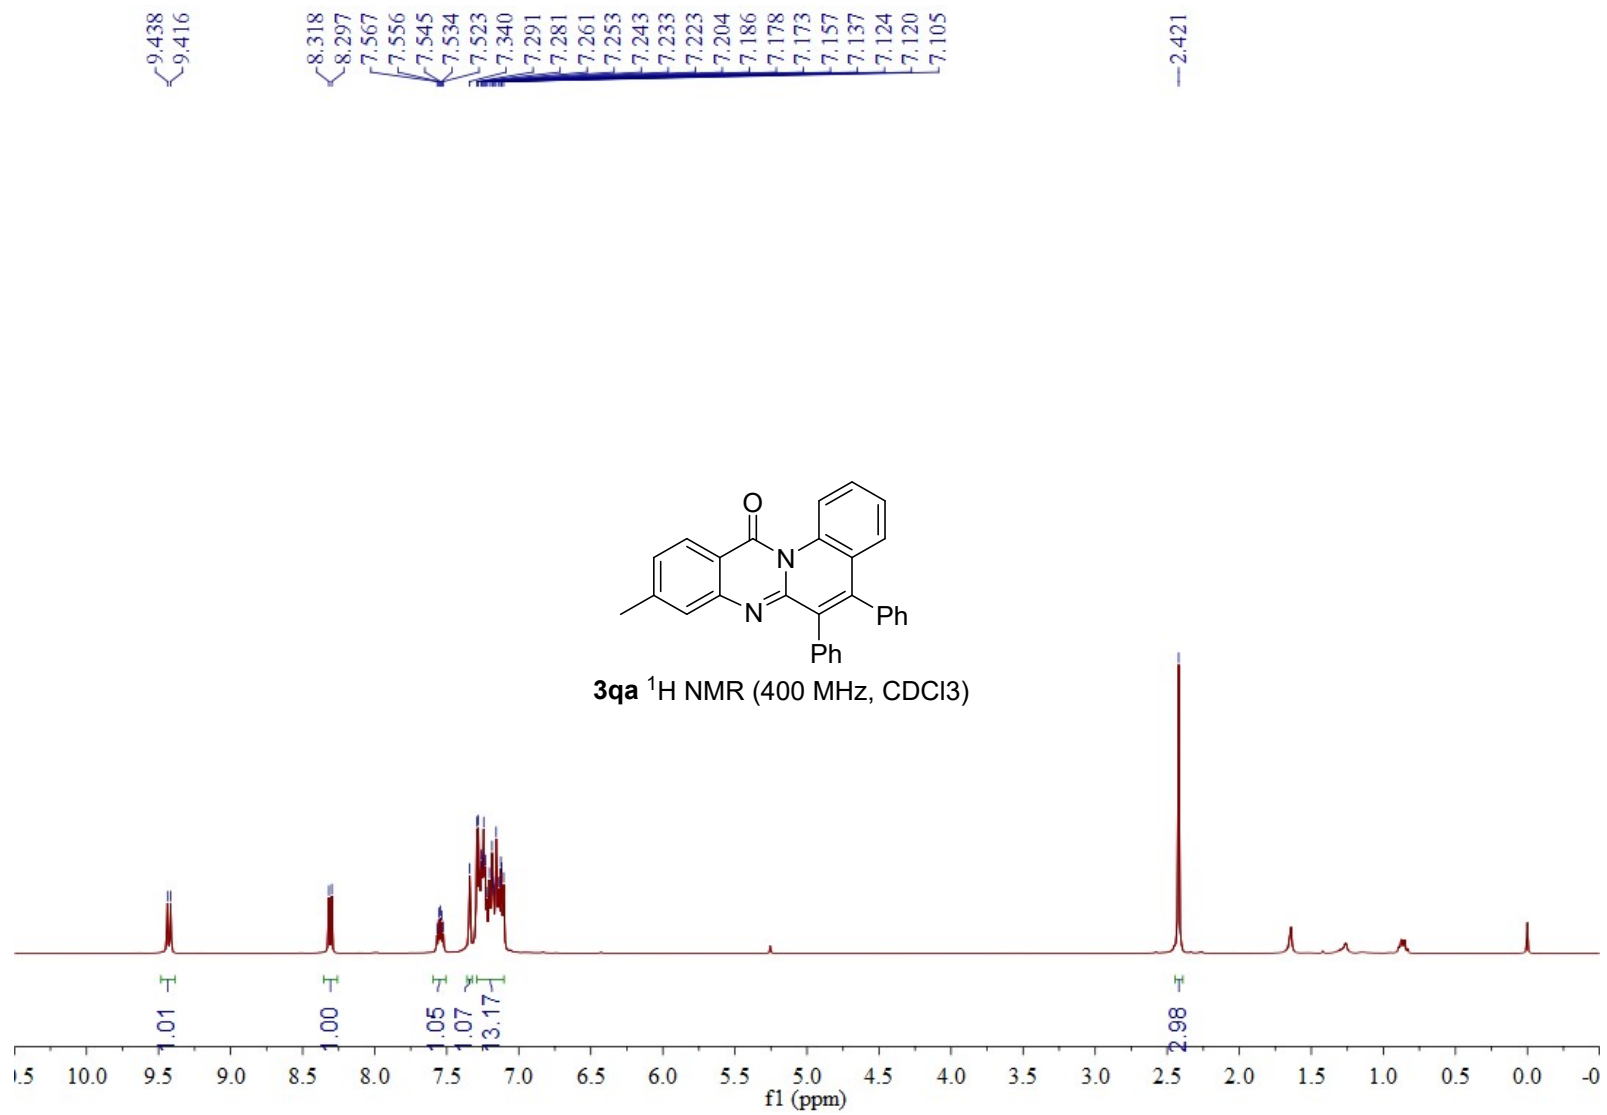

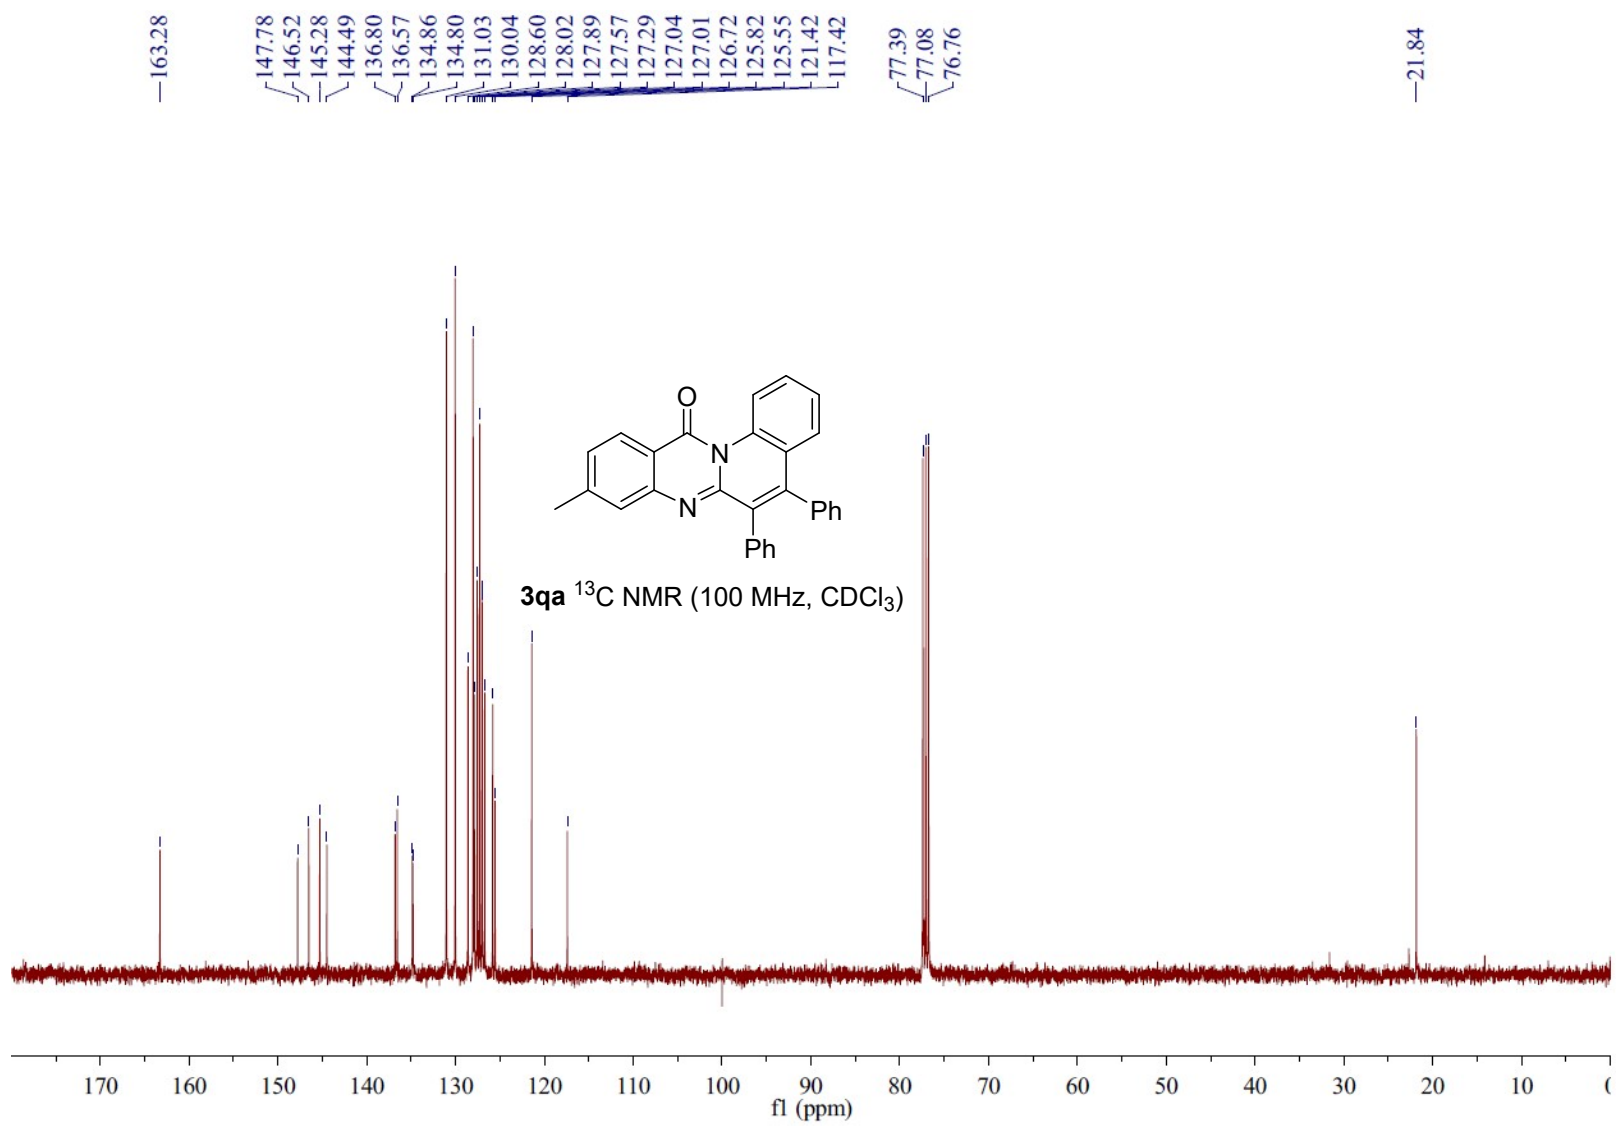

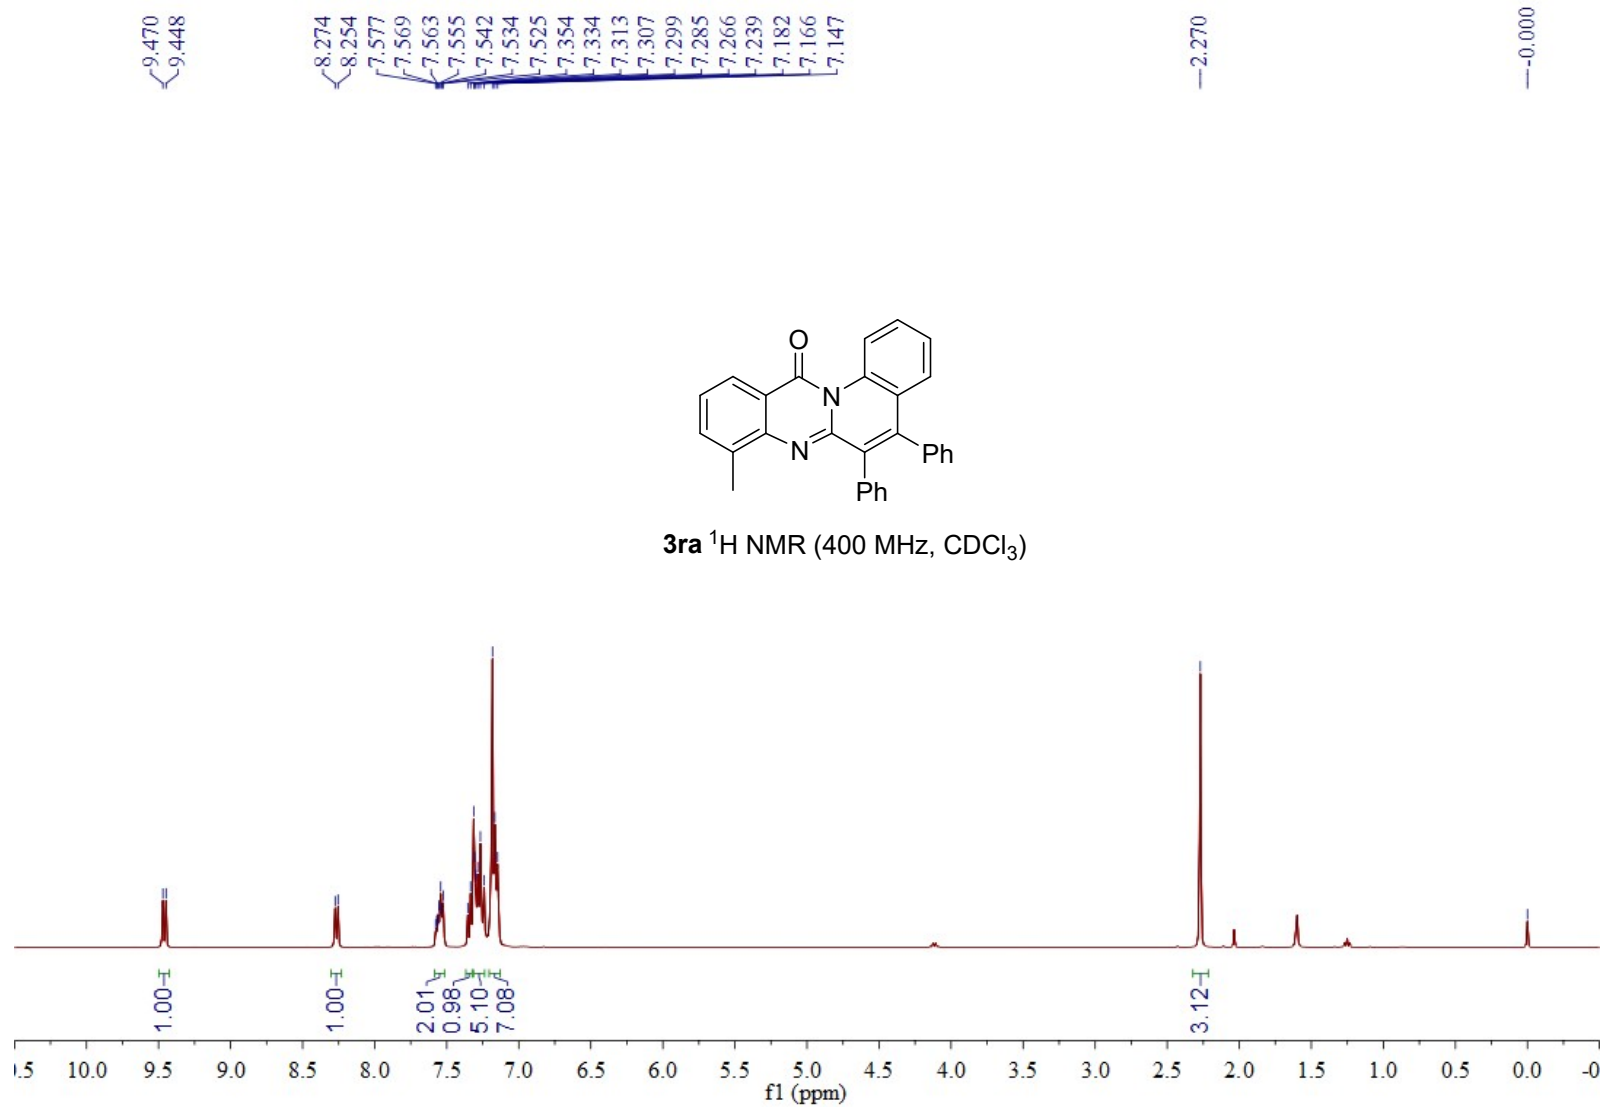

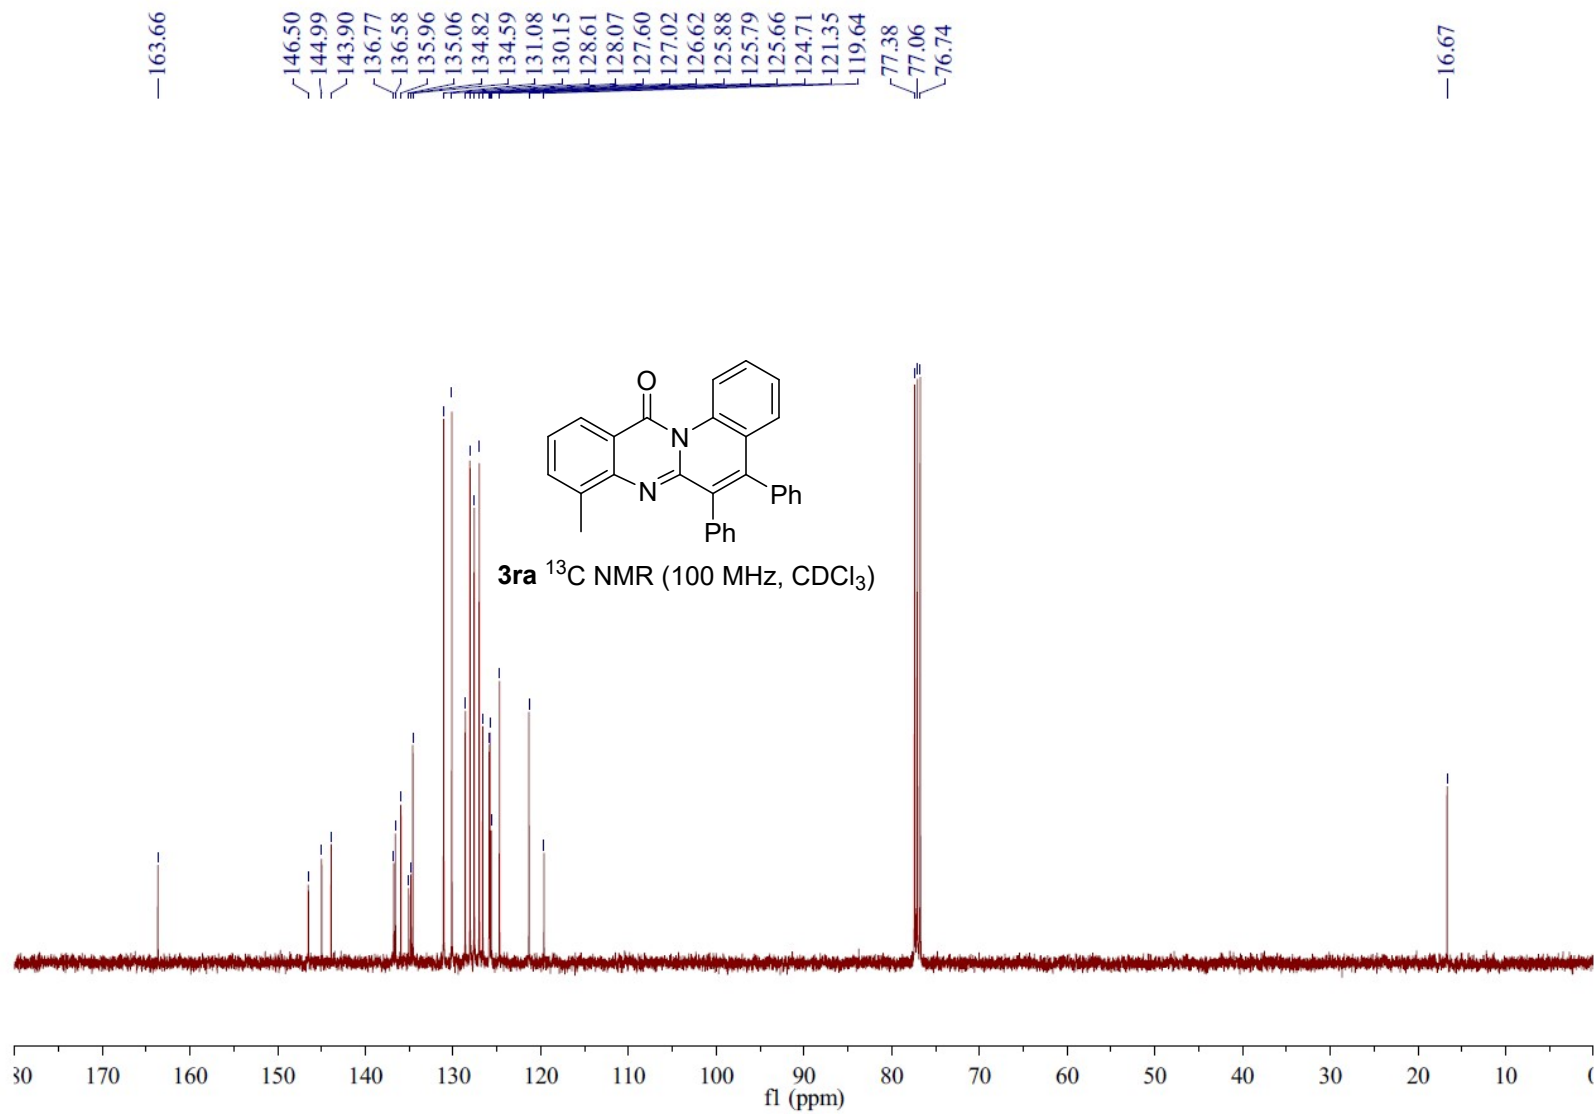

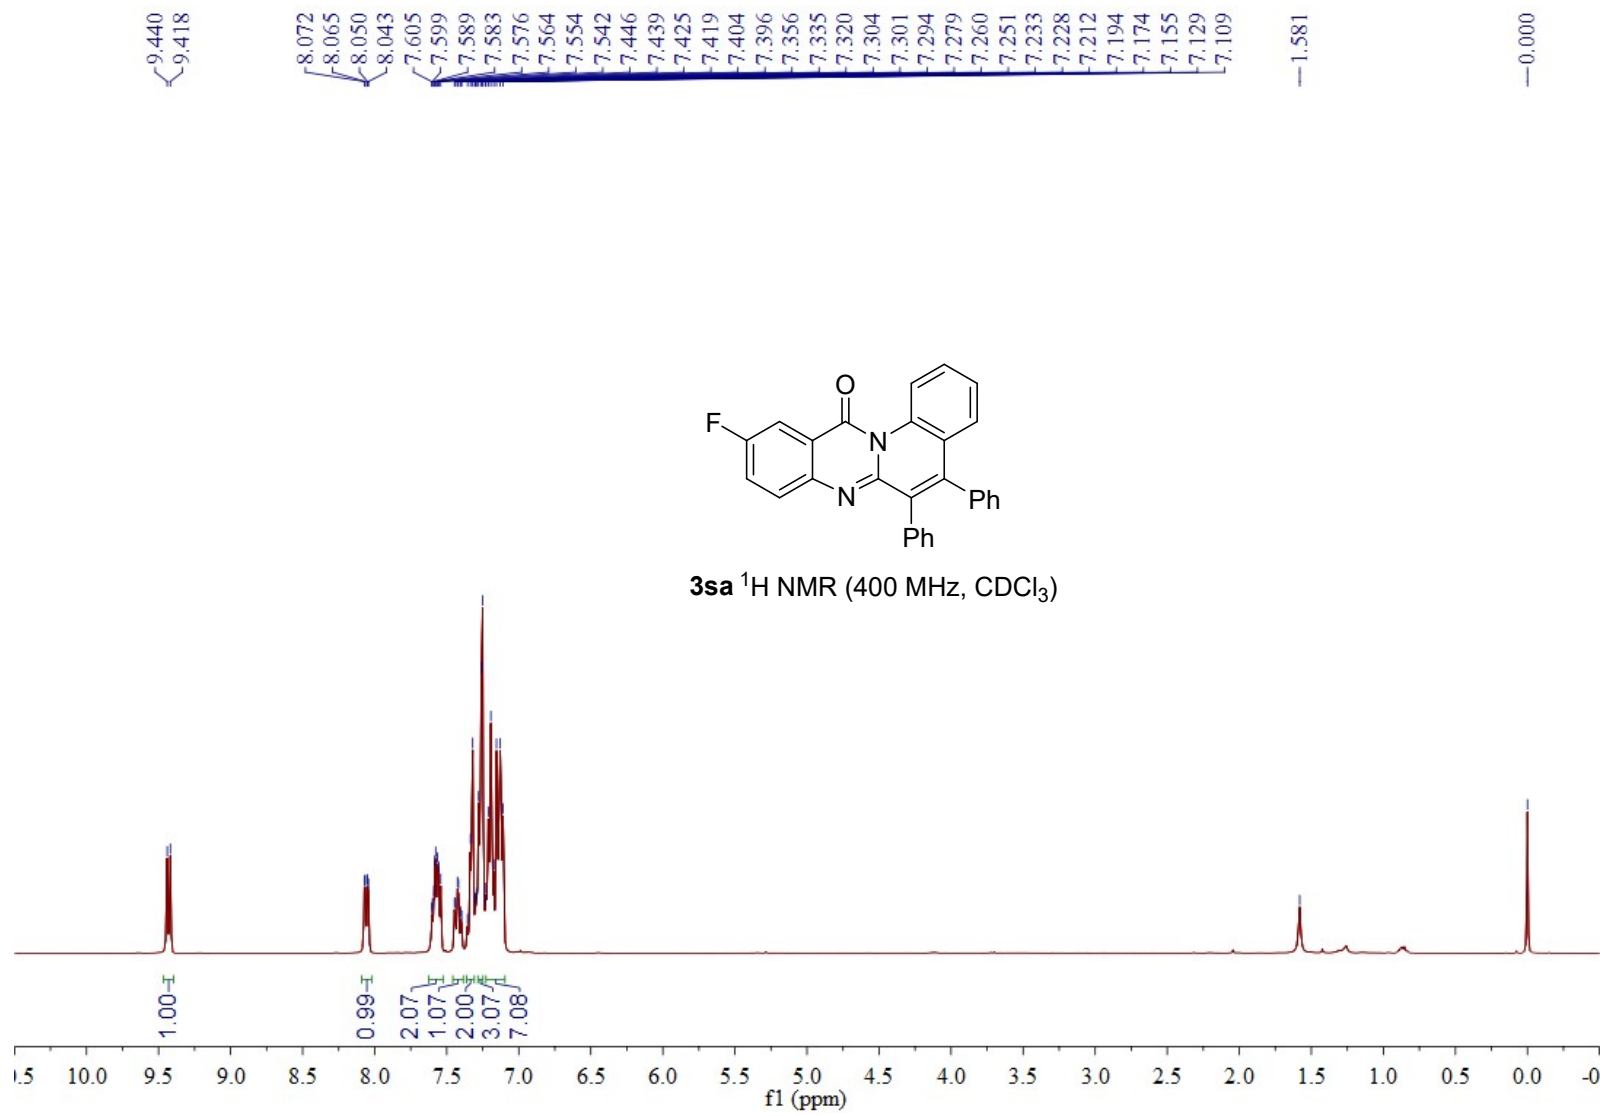

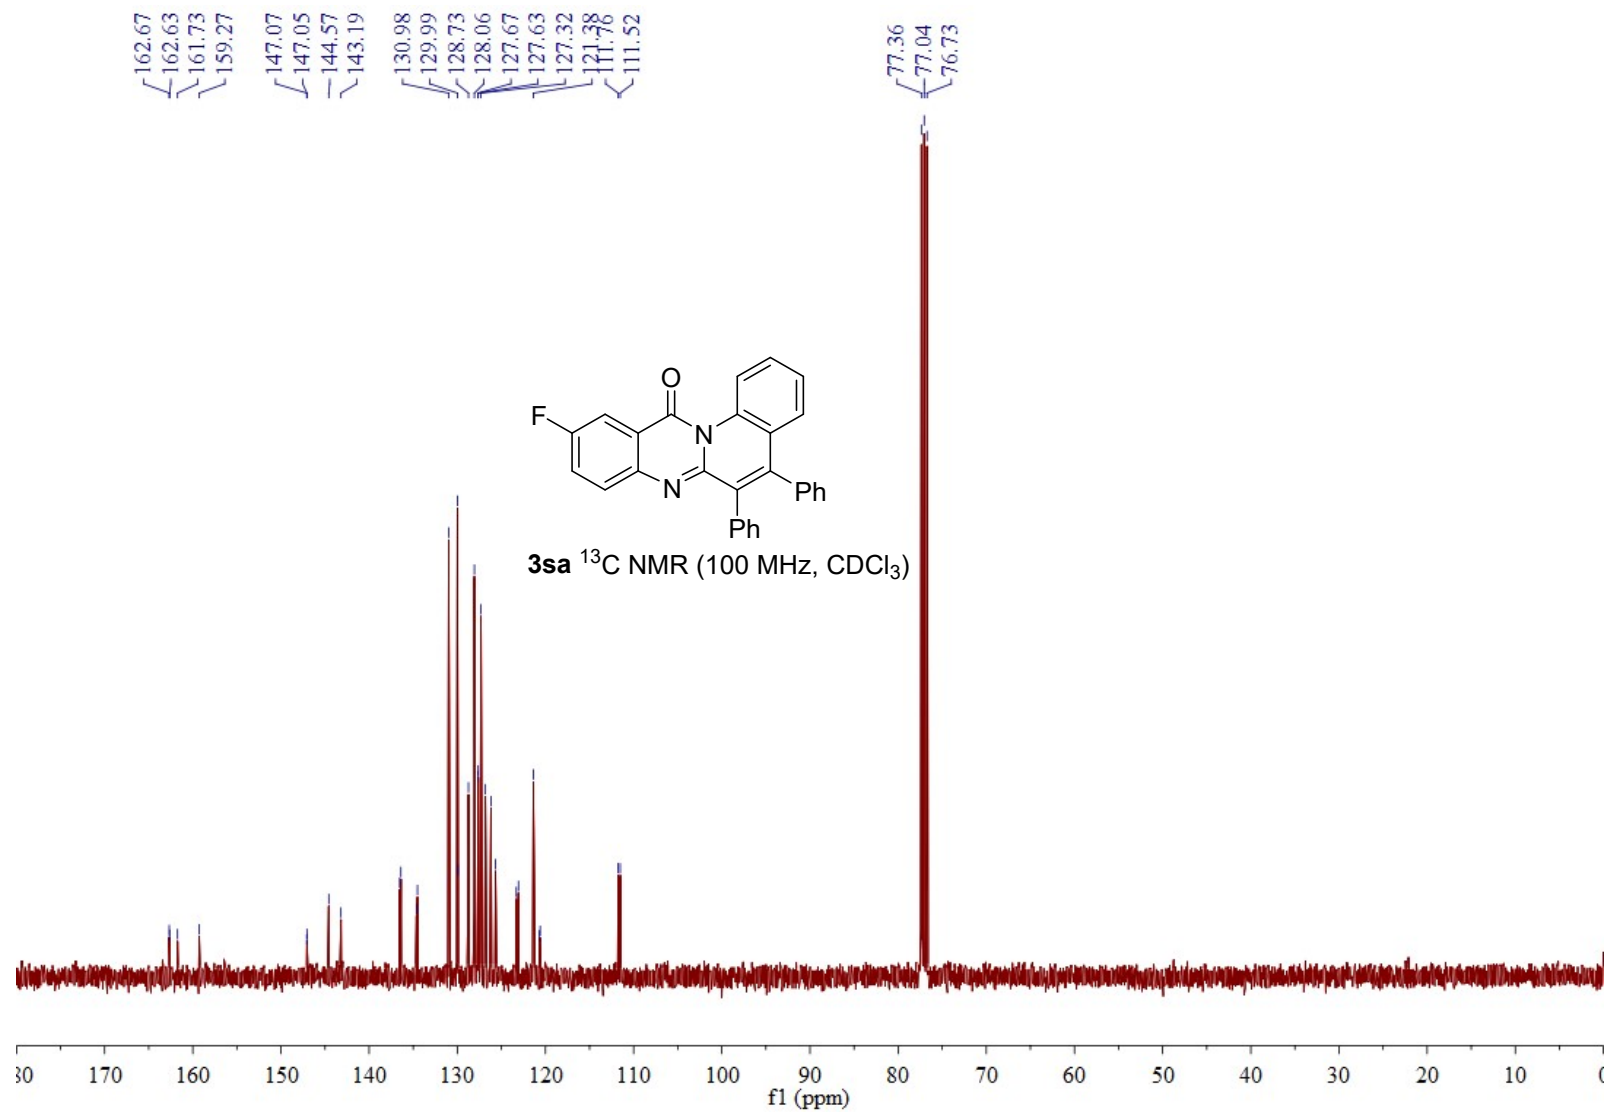

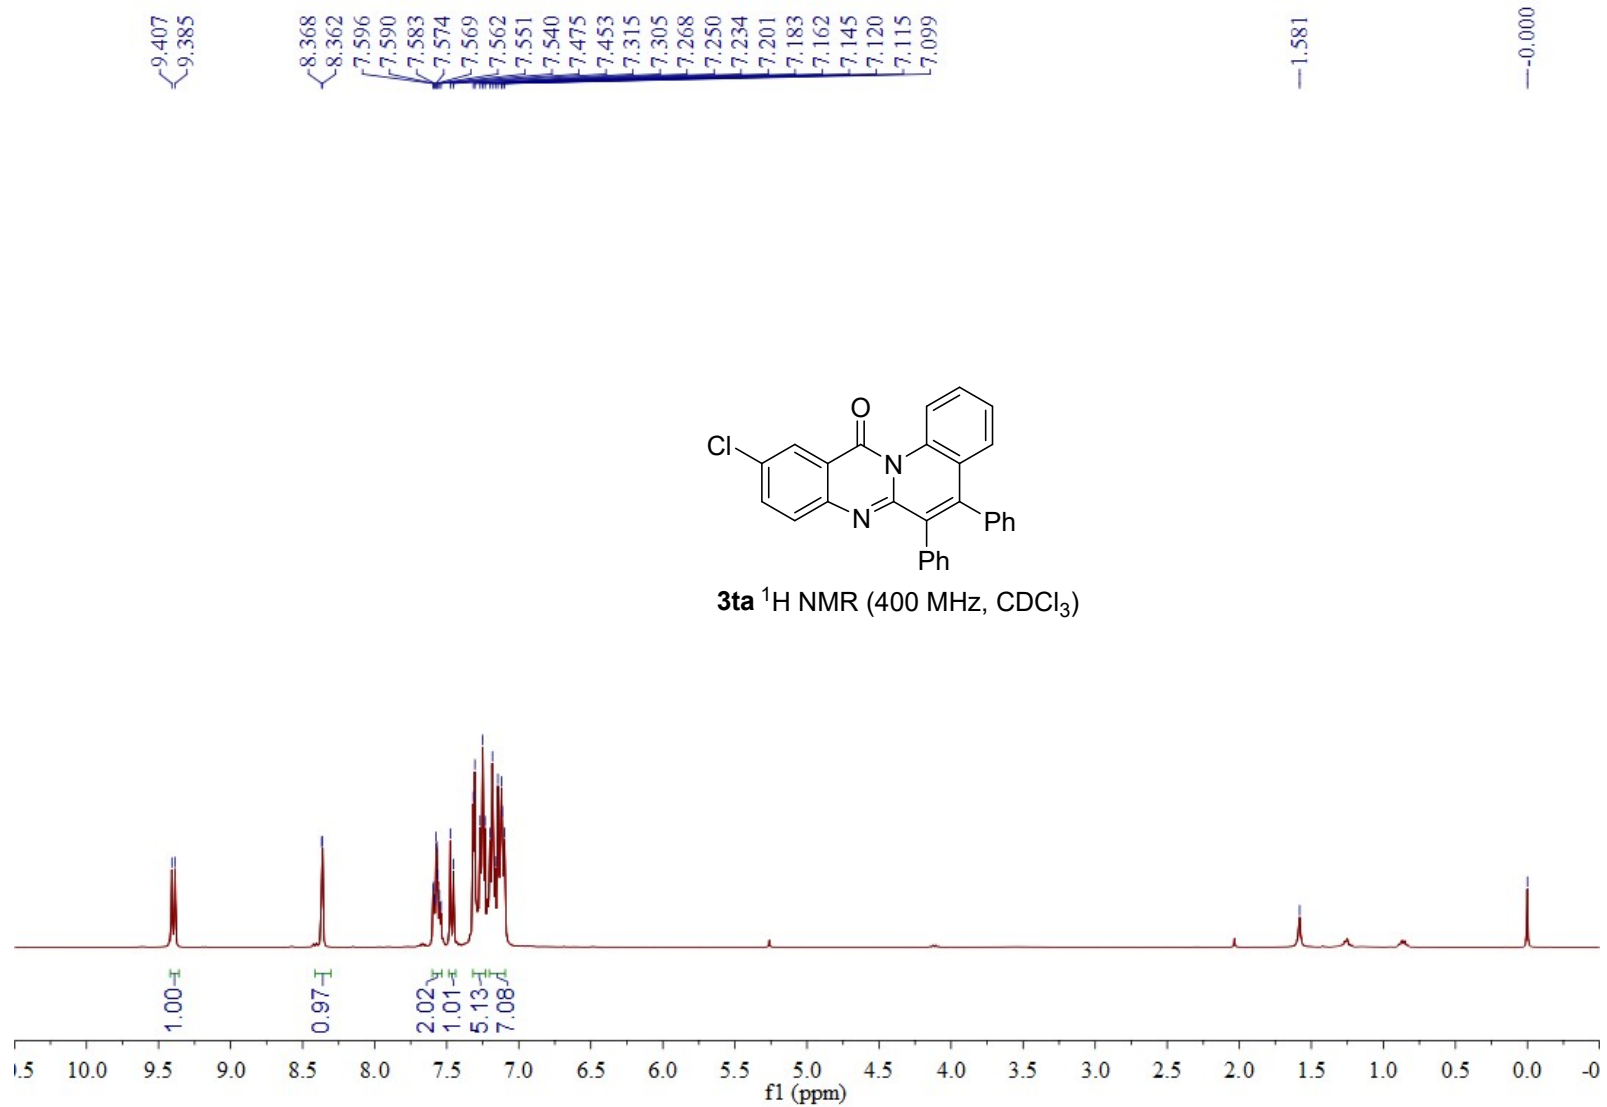



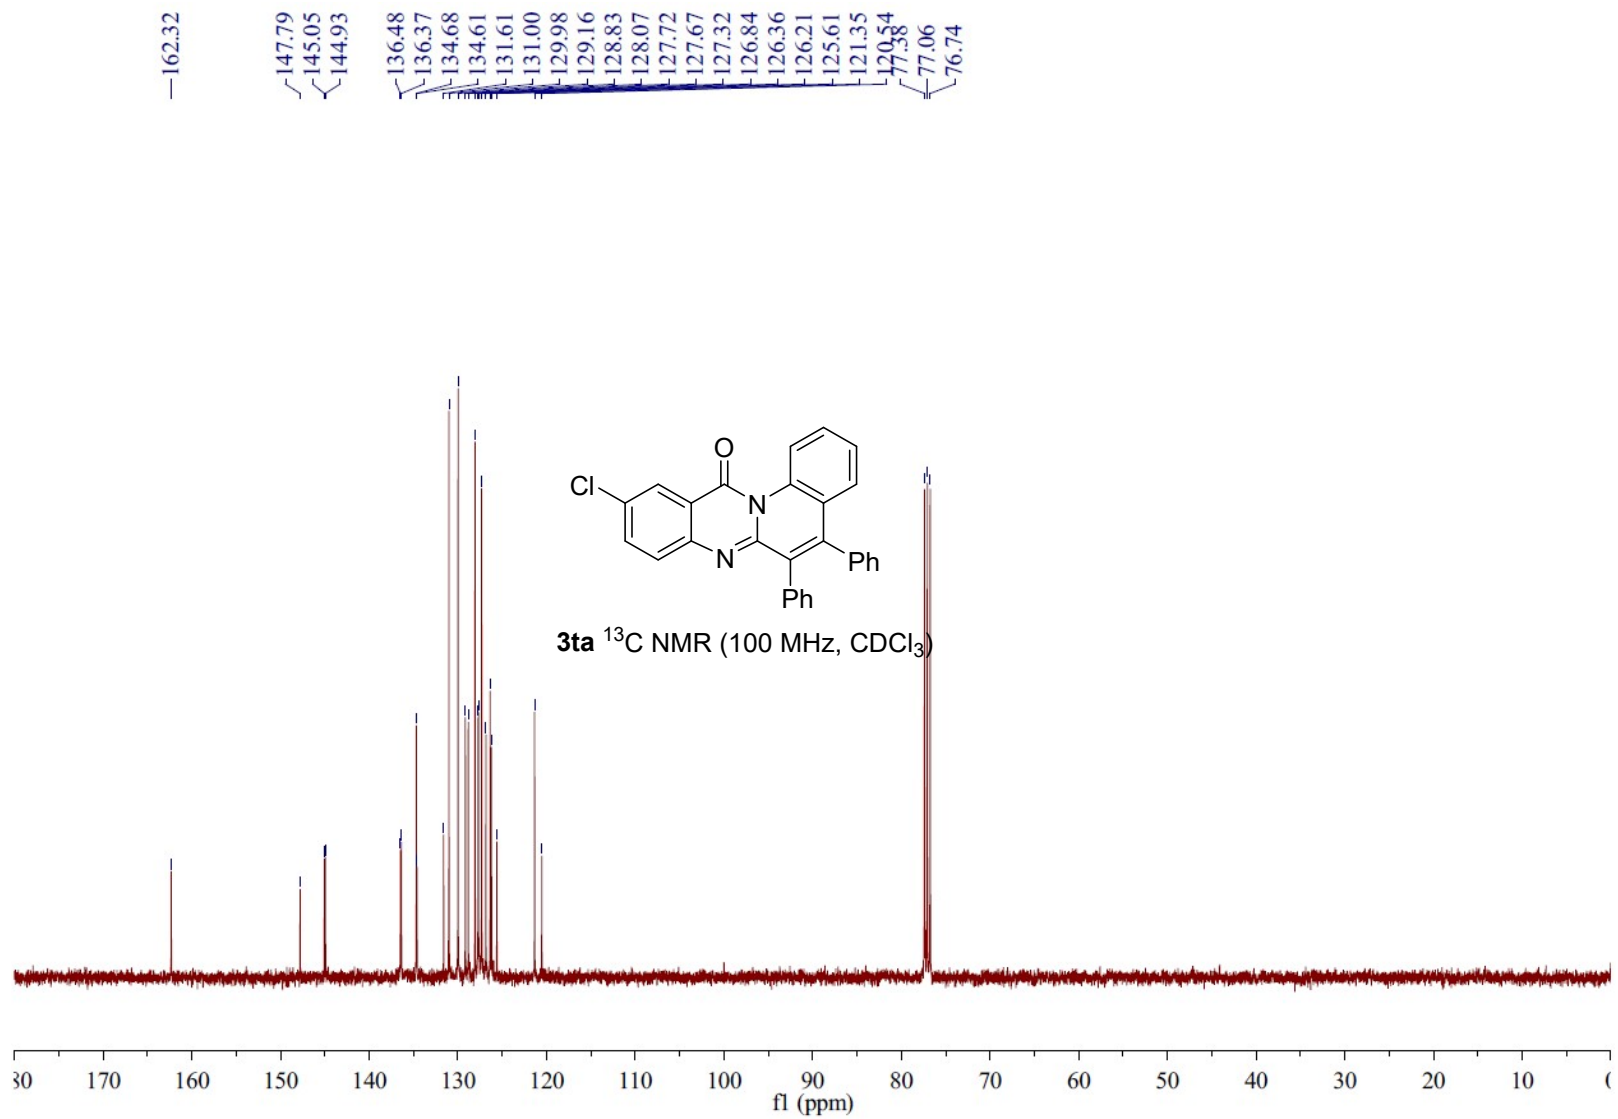

9.408  
9.386

8.331  
8.309  
7.585  
7.574  
7.563  
7.552  
7.541  
7.526  
7.523  
7.365  
7.364  
7.361  
7.344  
7.339  
7.318  
7.307  
7.269  
7.251  
7.236  
7.222  
7.206  
7.188  
7.169  
7.137  
7.134  
7.119  
7.102

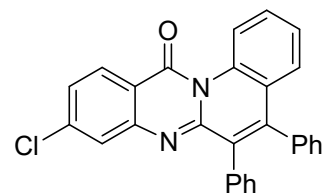

**3ua**  $^1\text{H}$  NMR (400 MHz,  $\text{CDCl}_3$ )

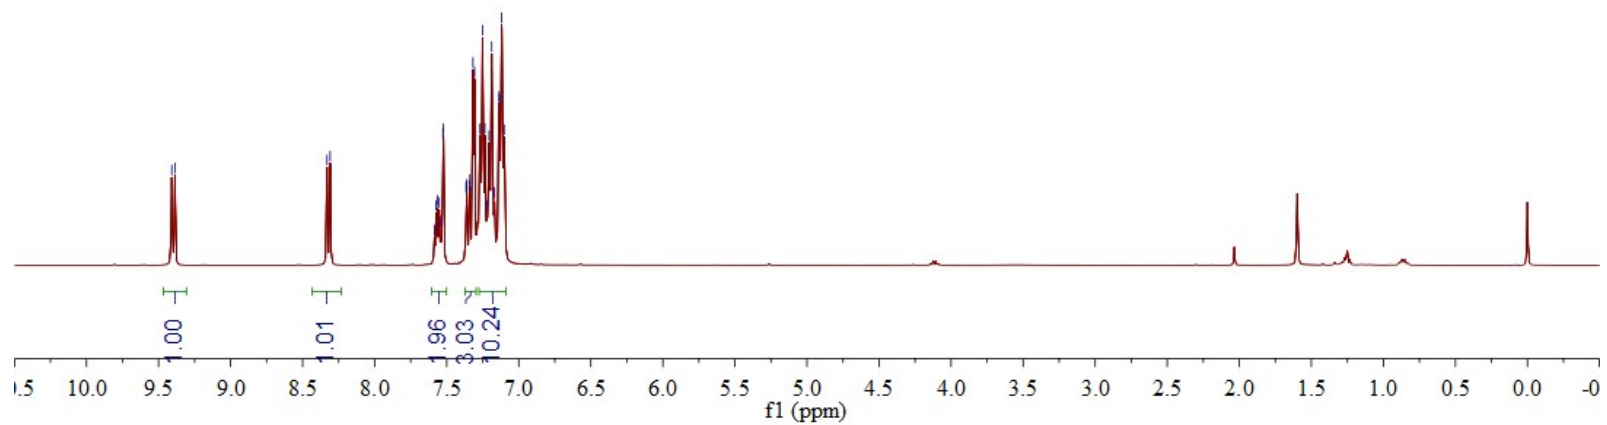

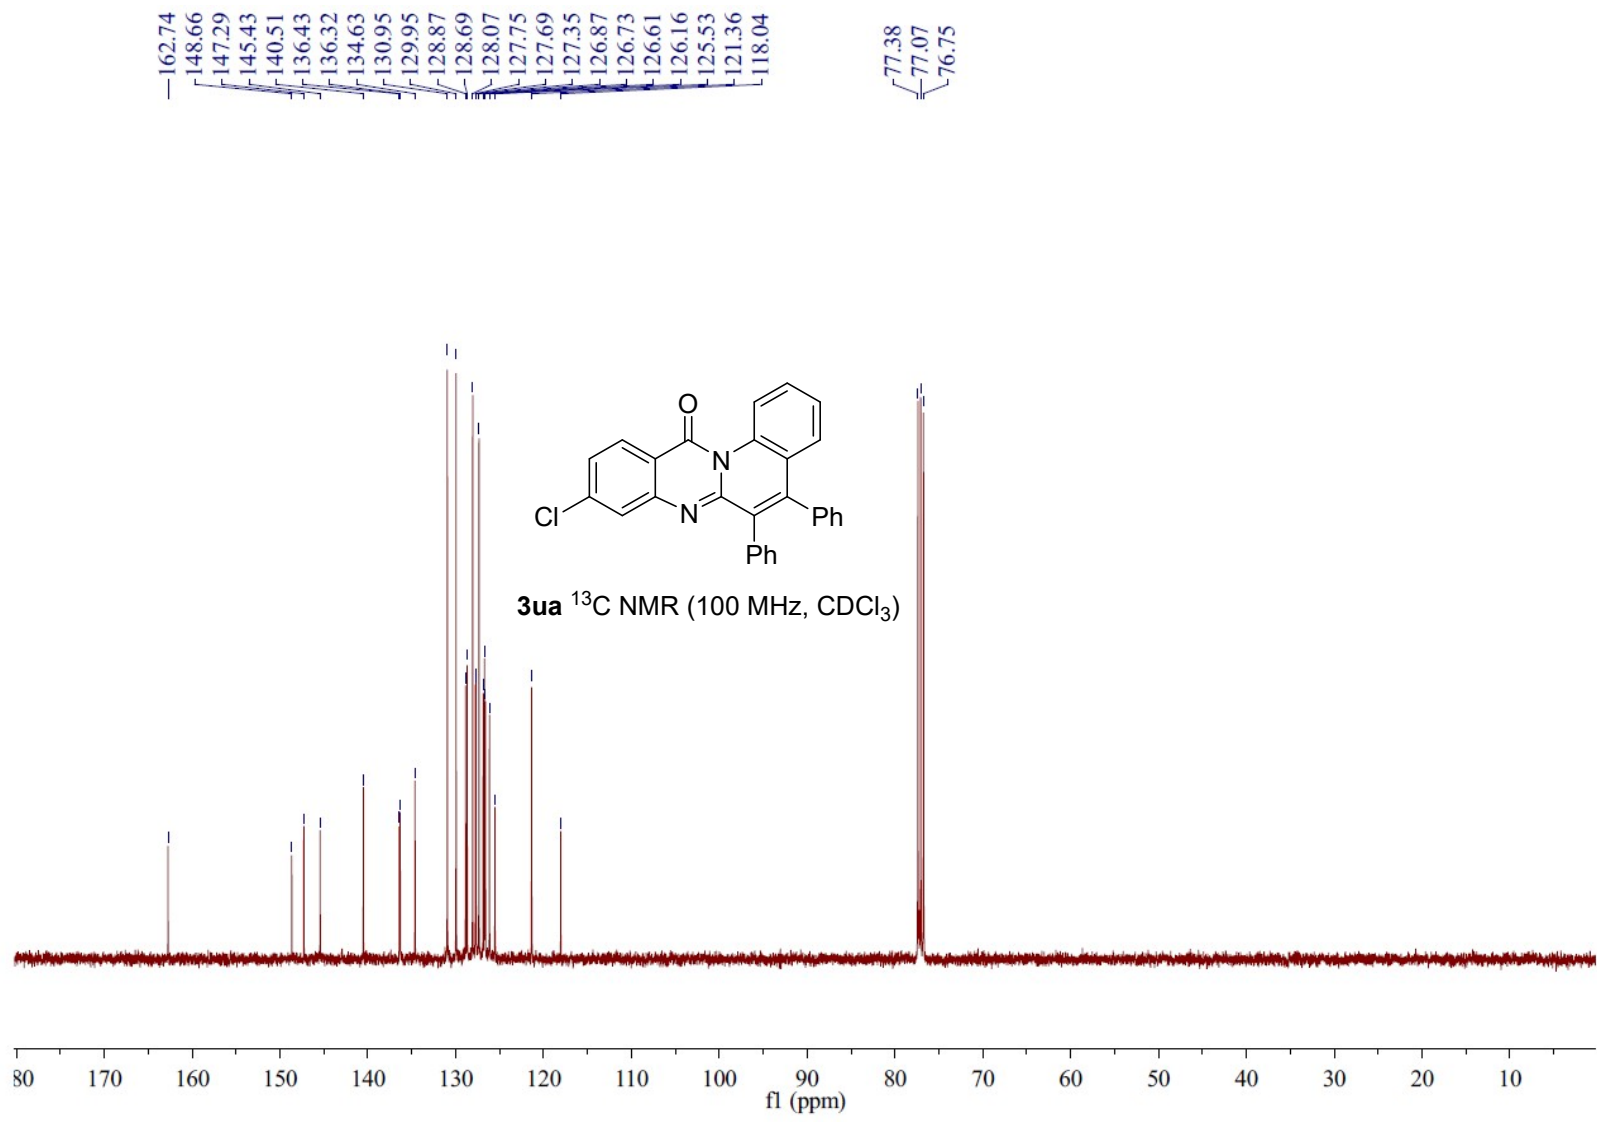

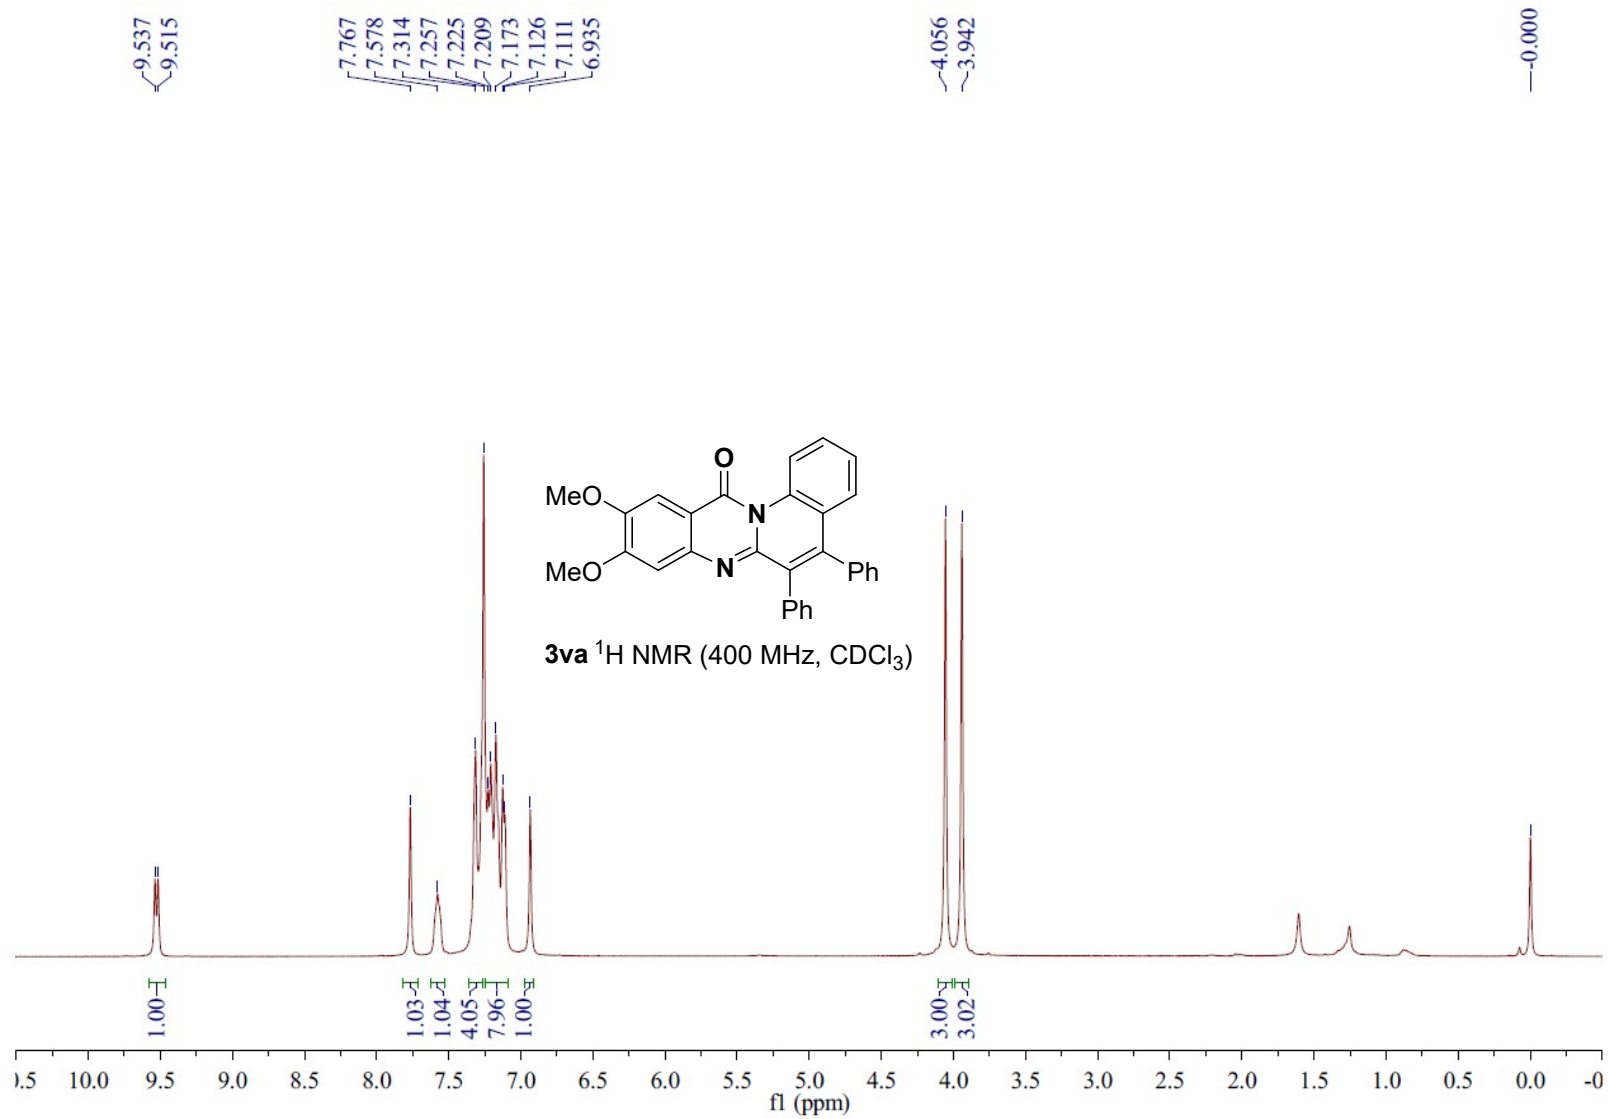

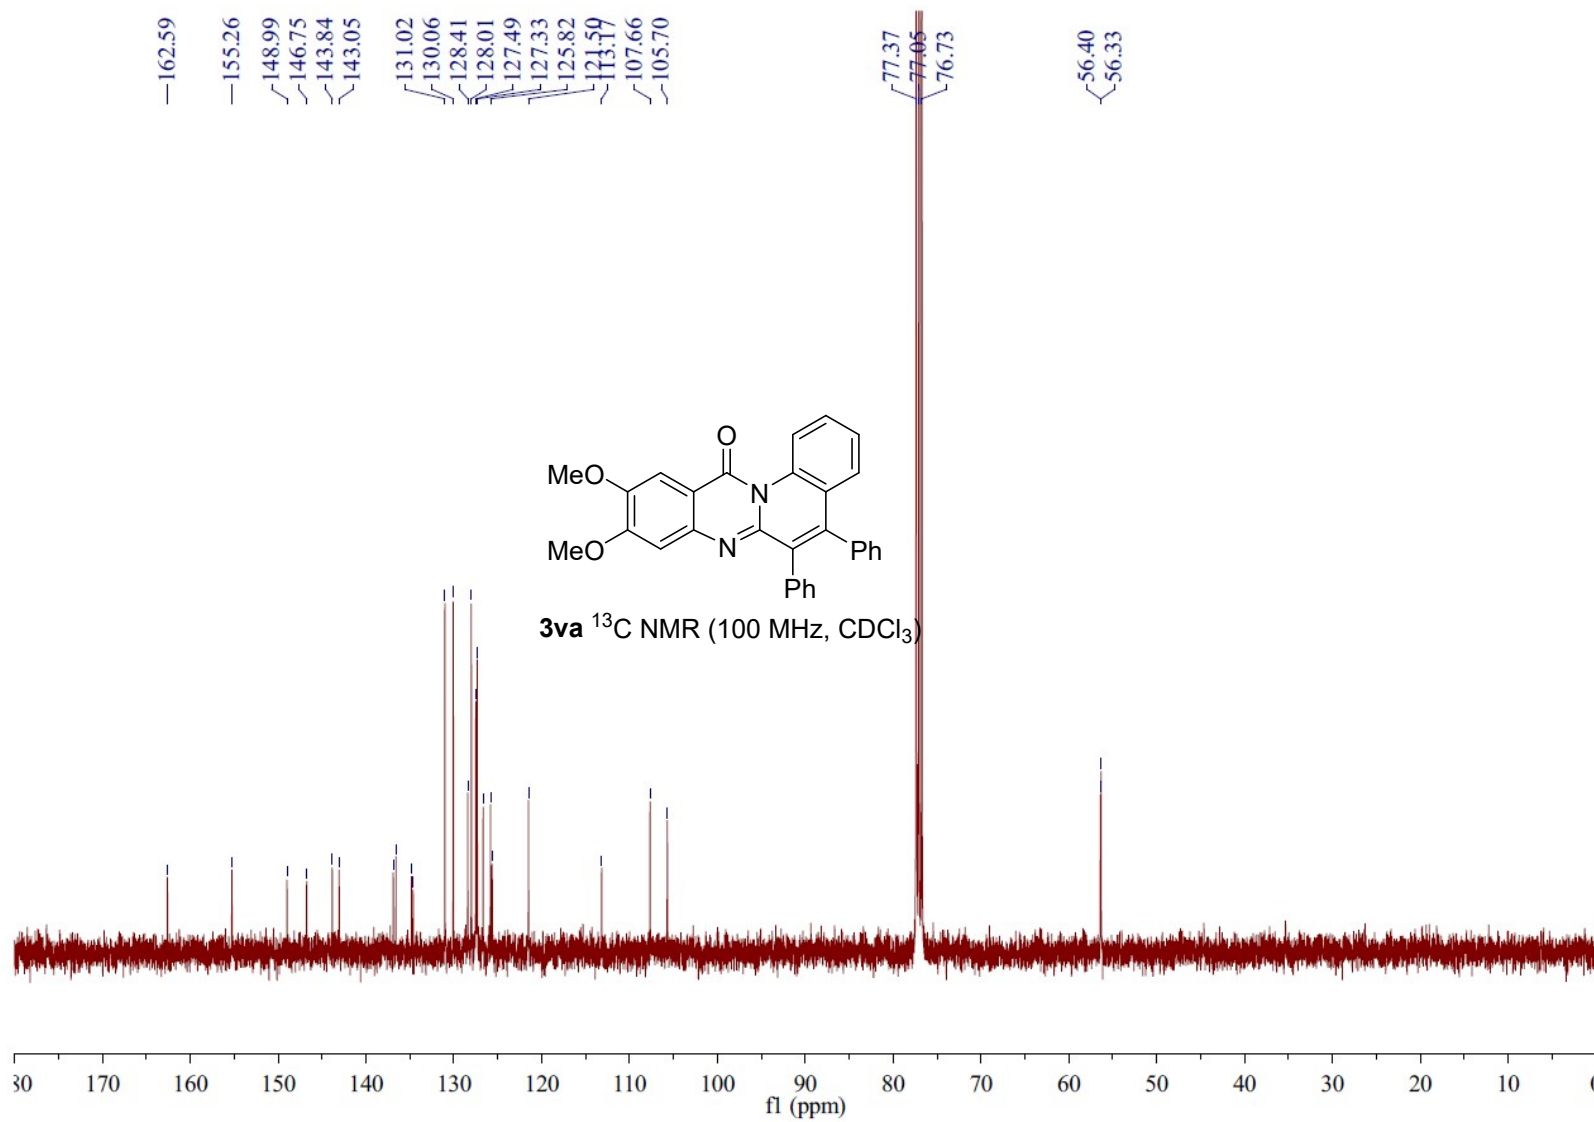

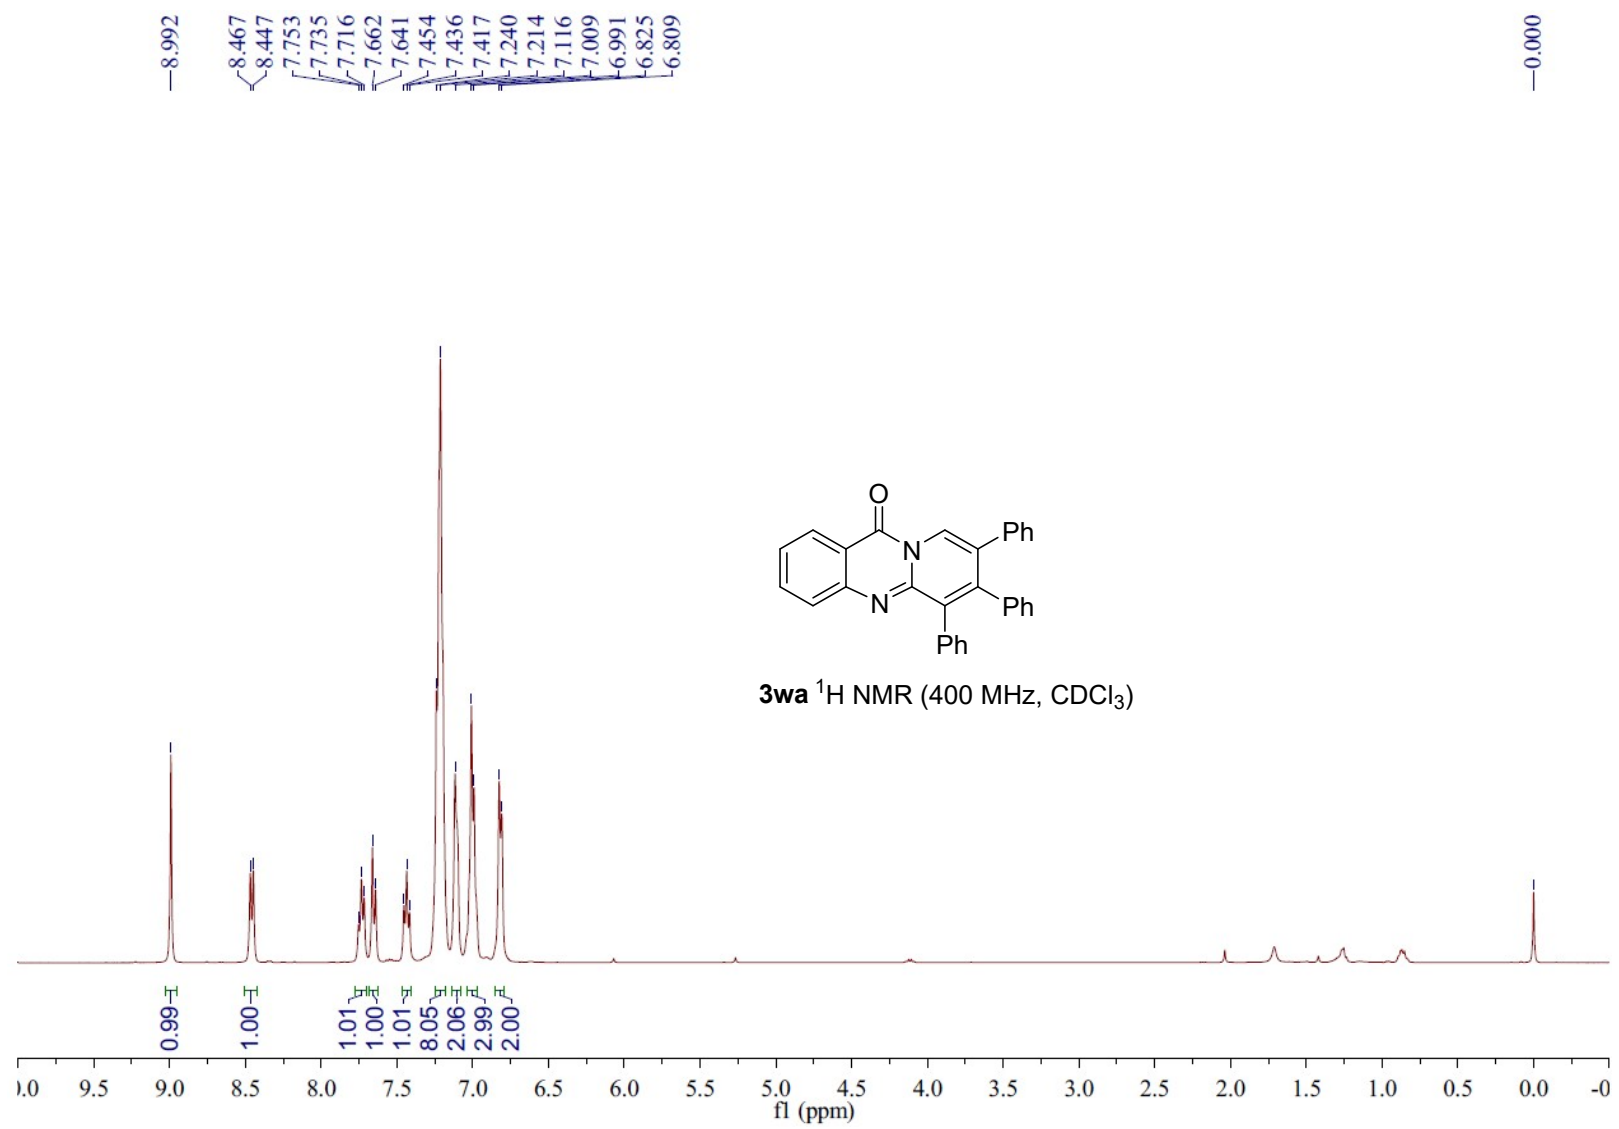

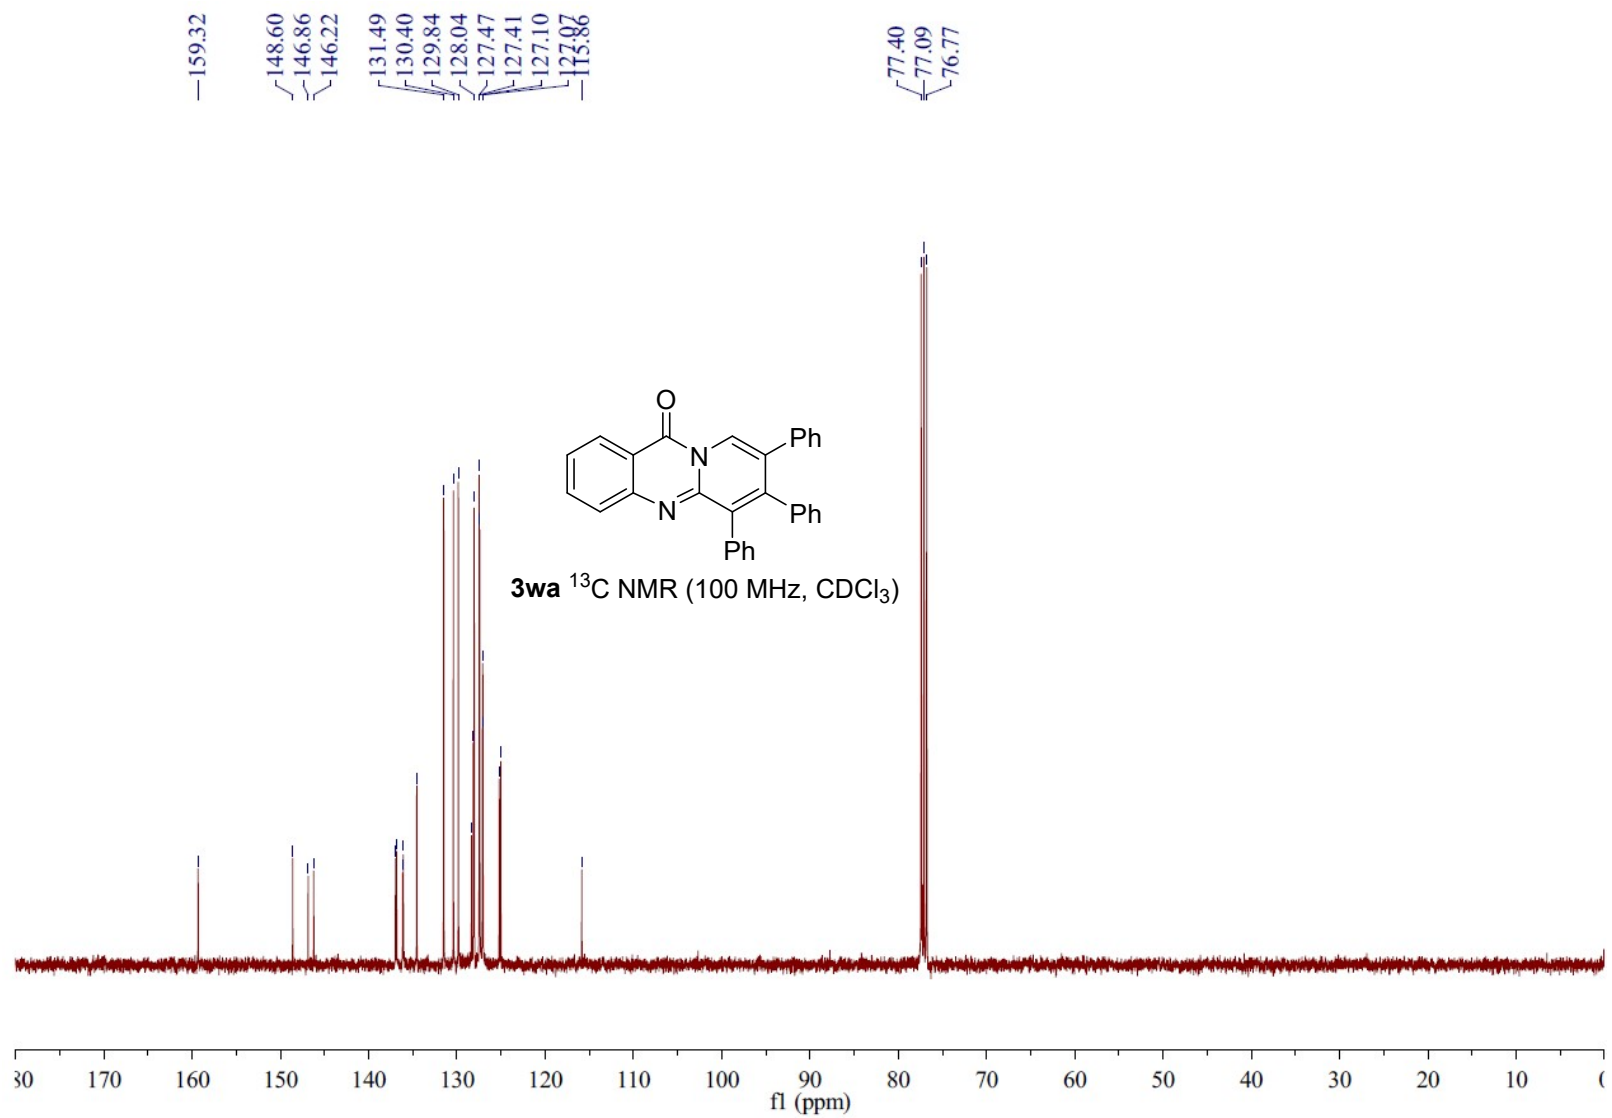

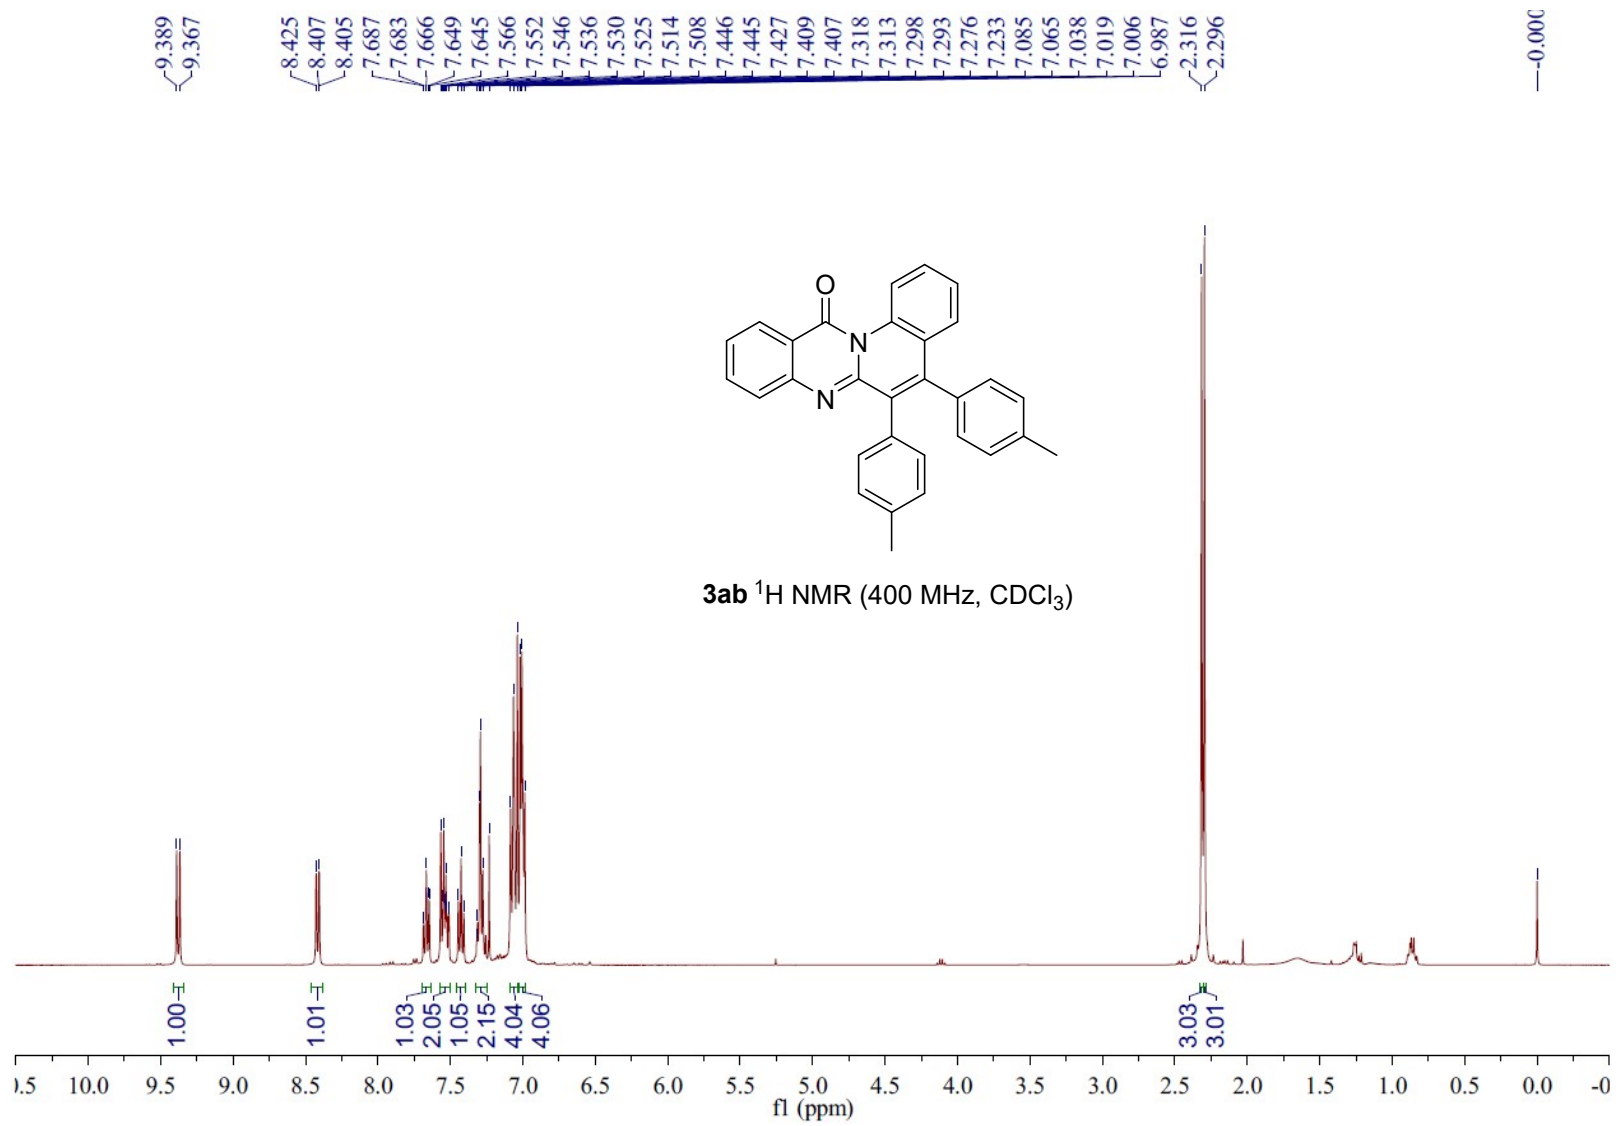



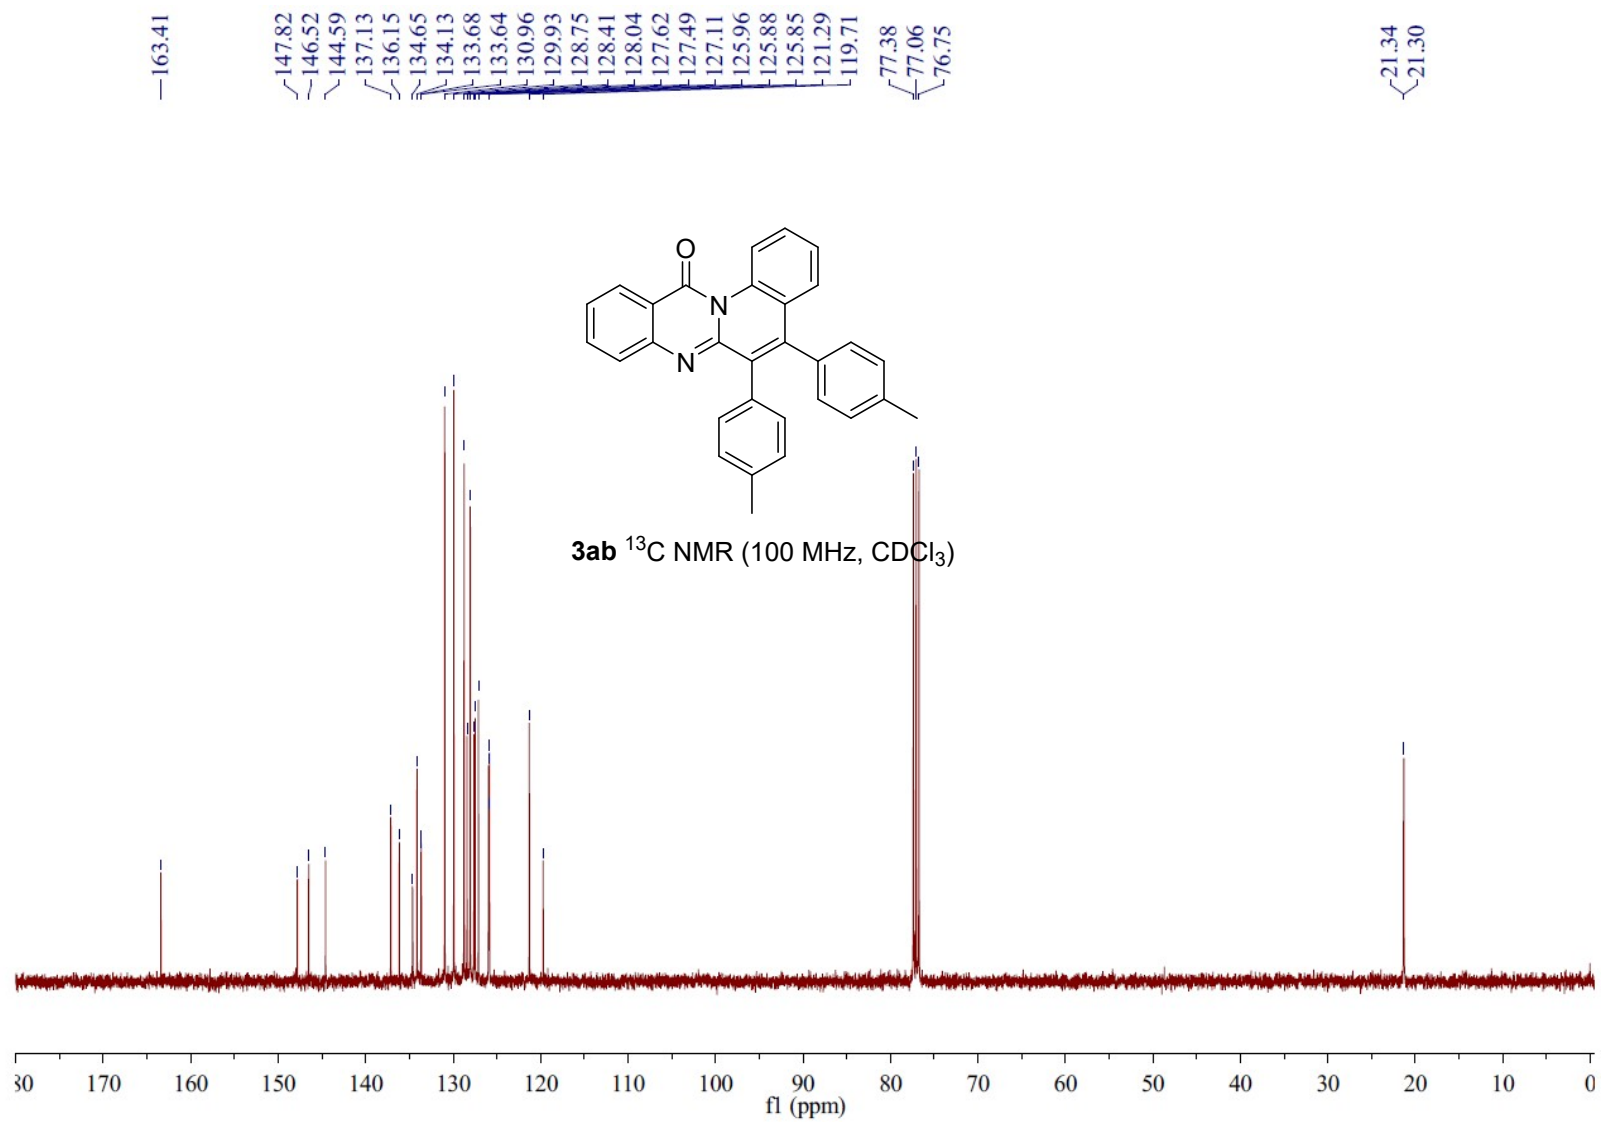

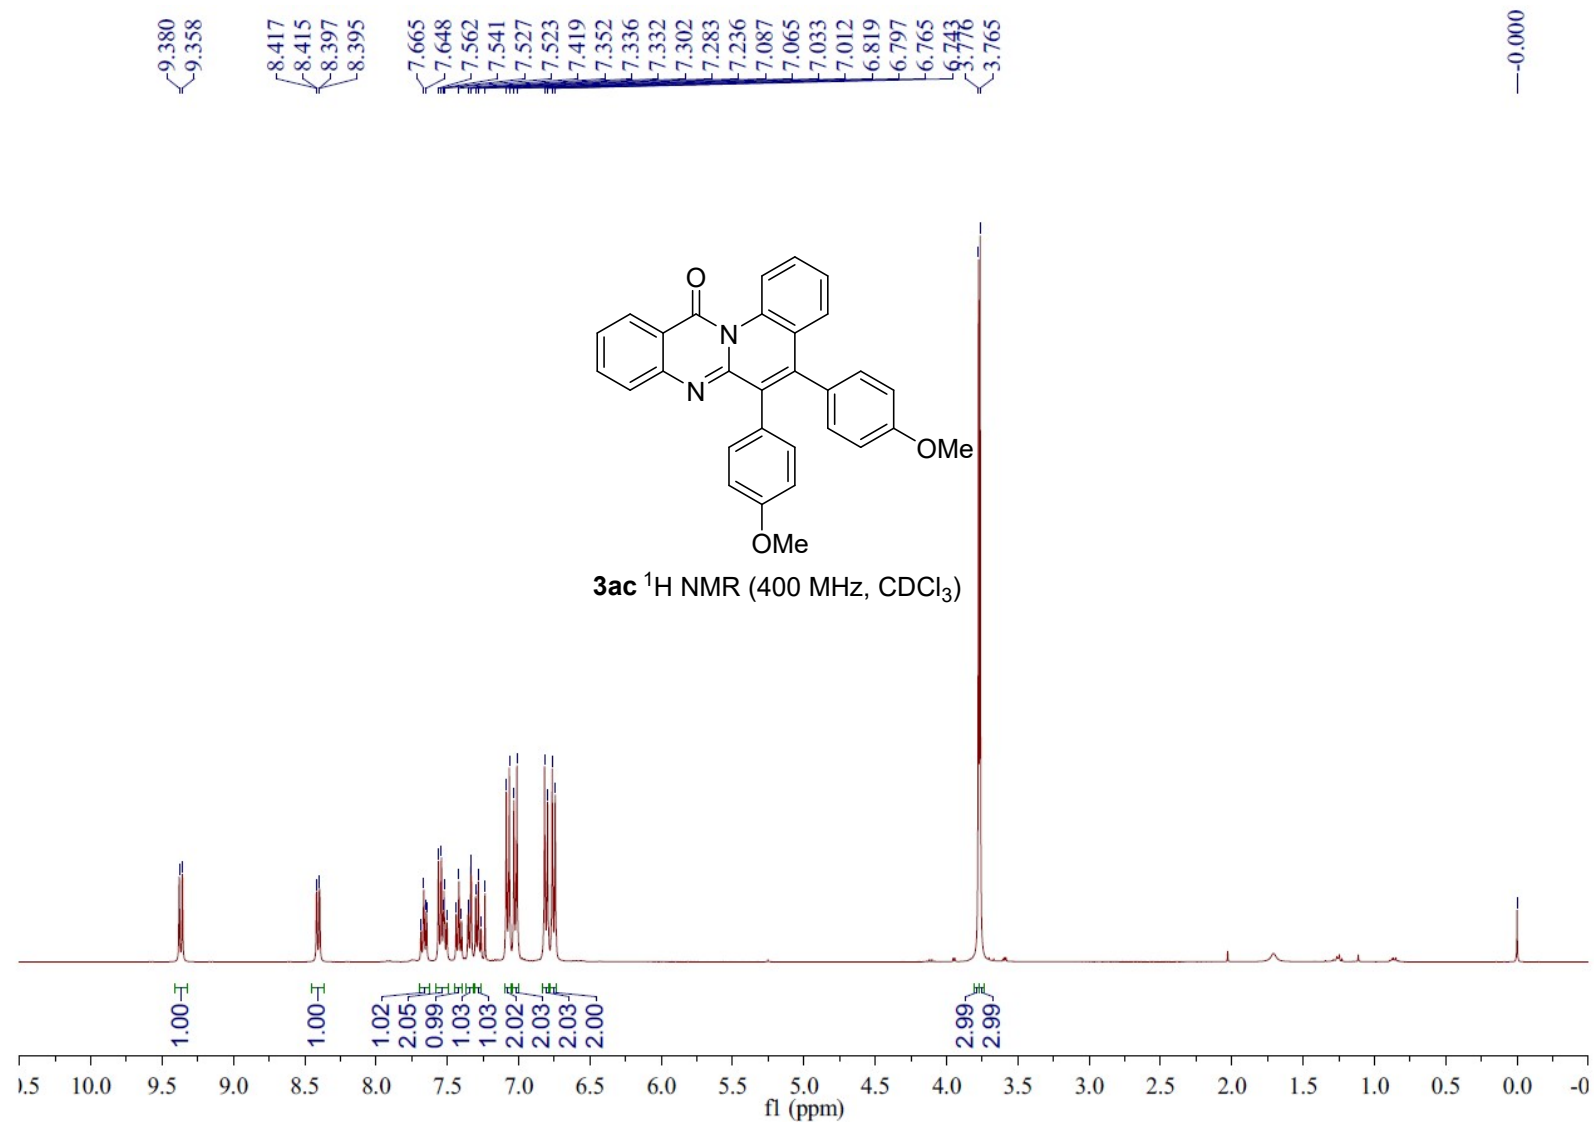

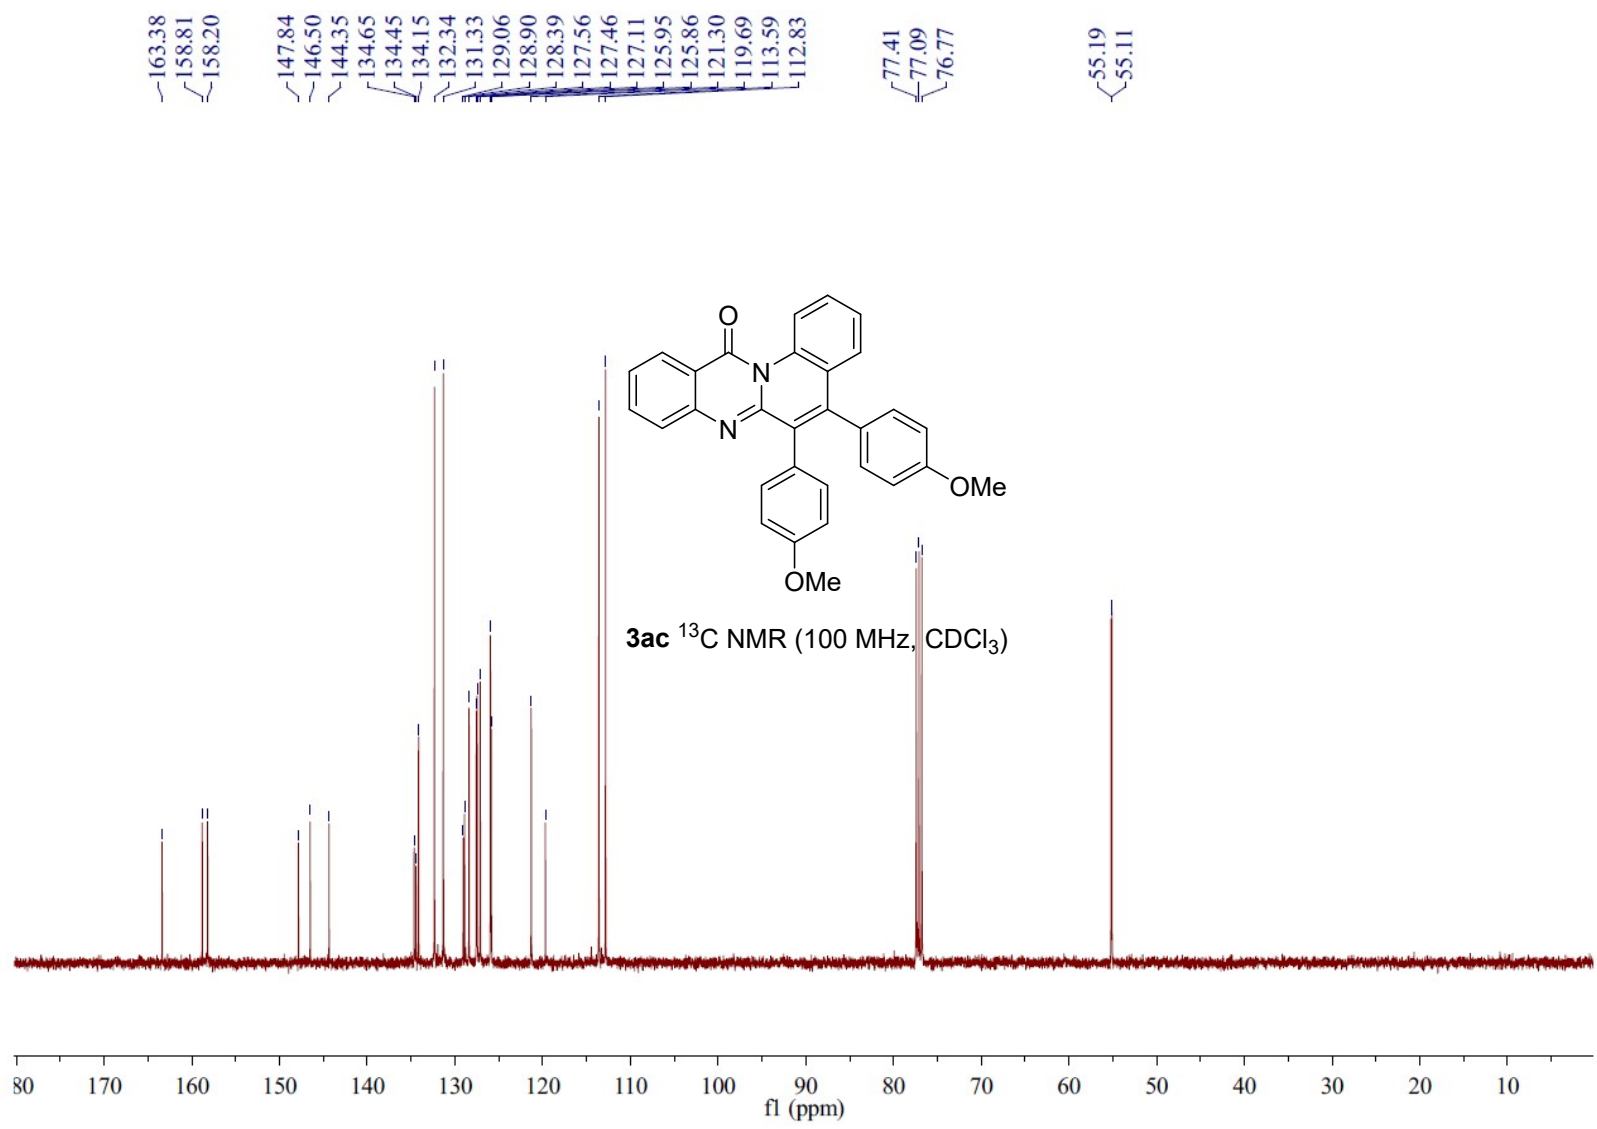

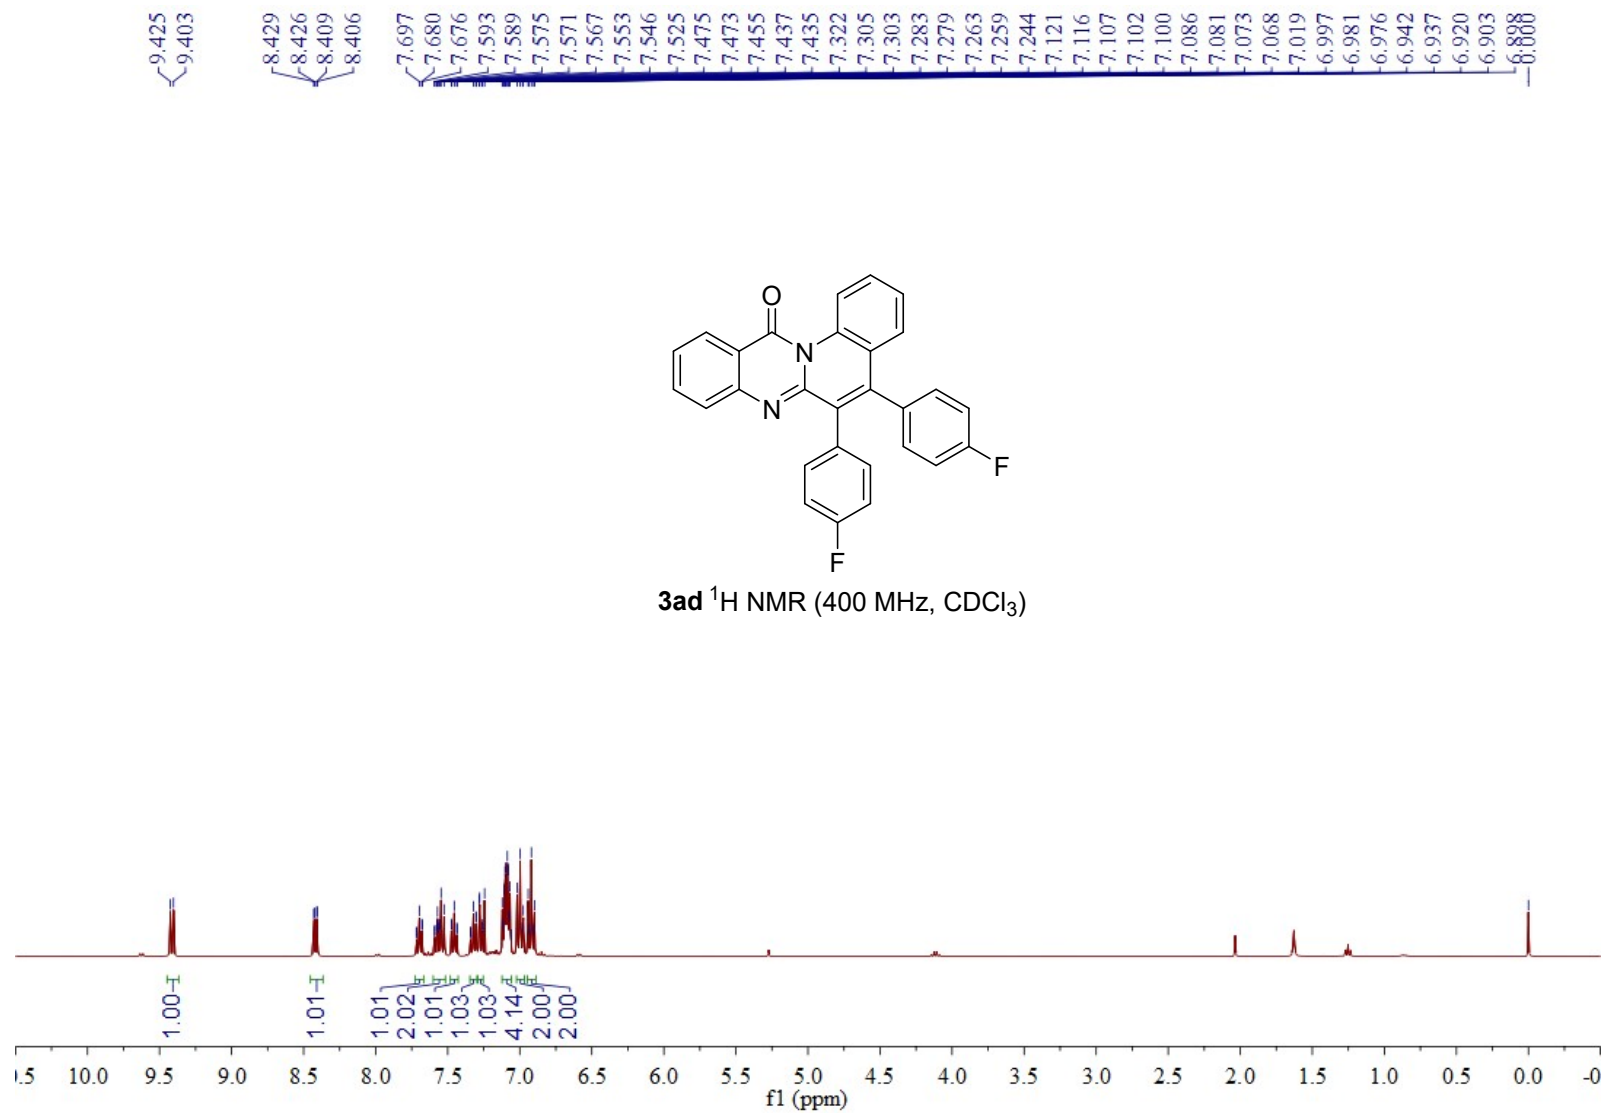

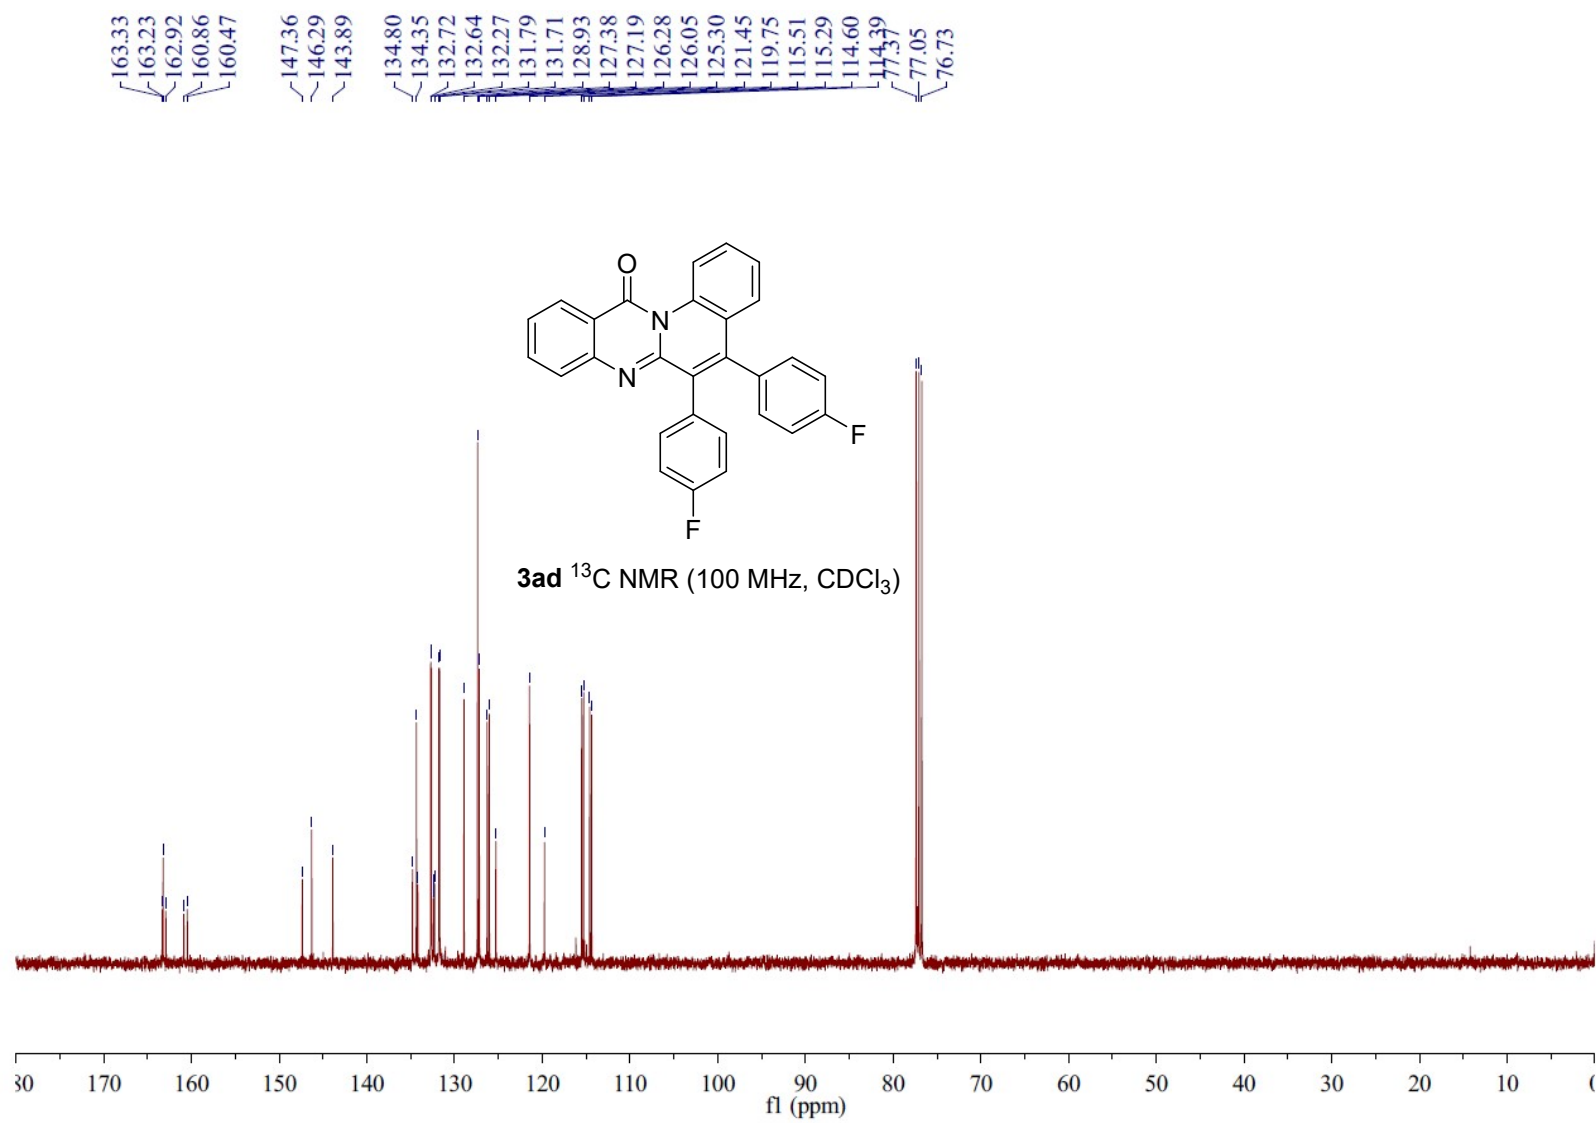

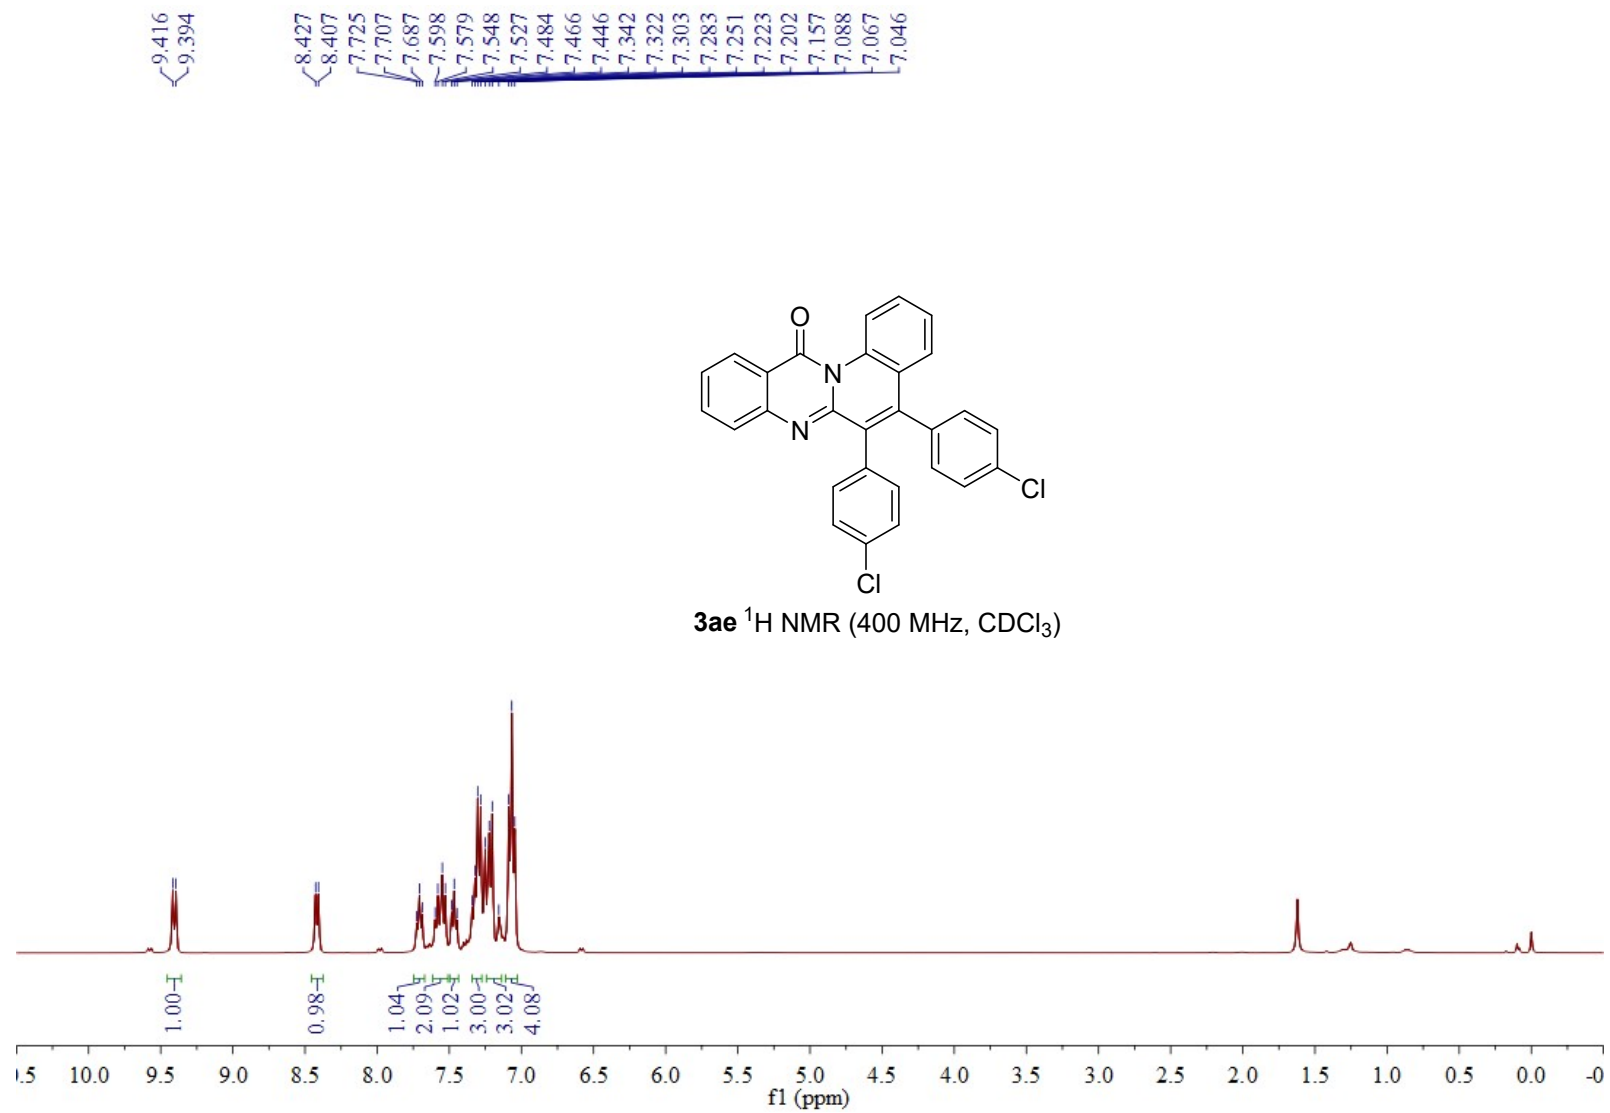

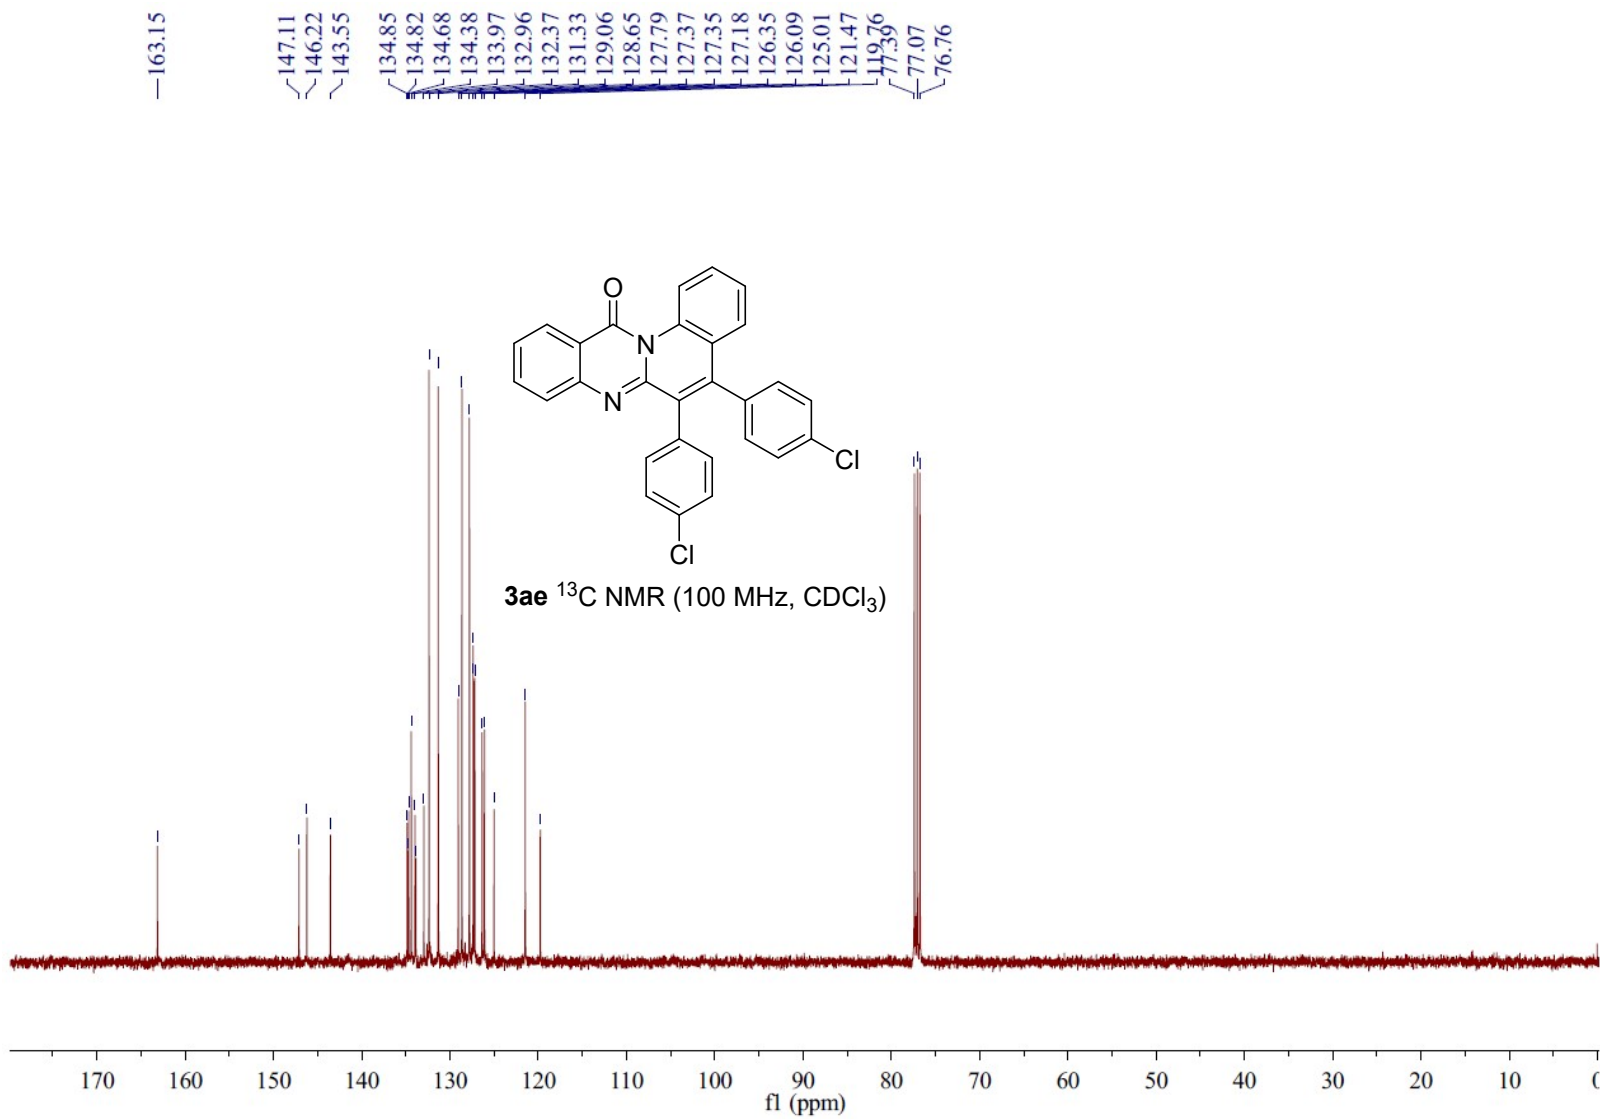

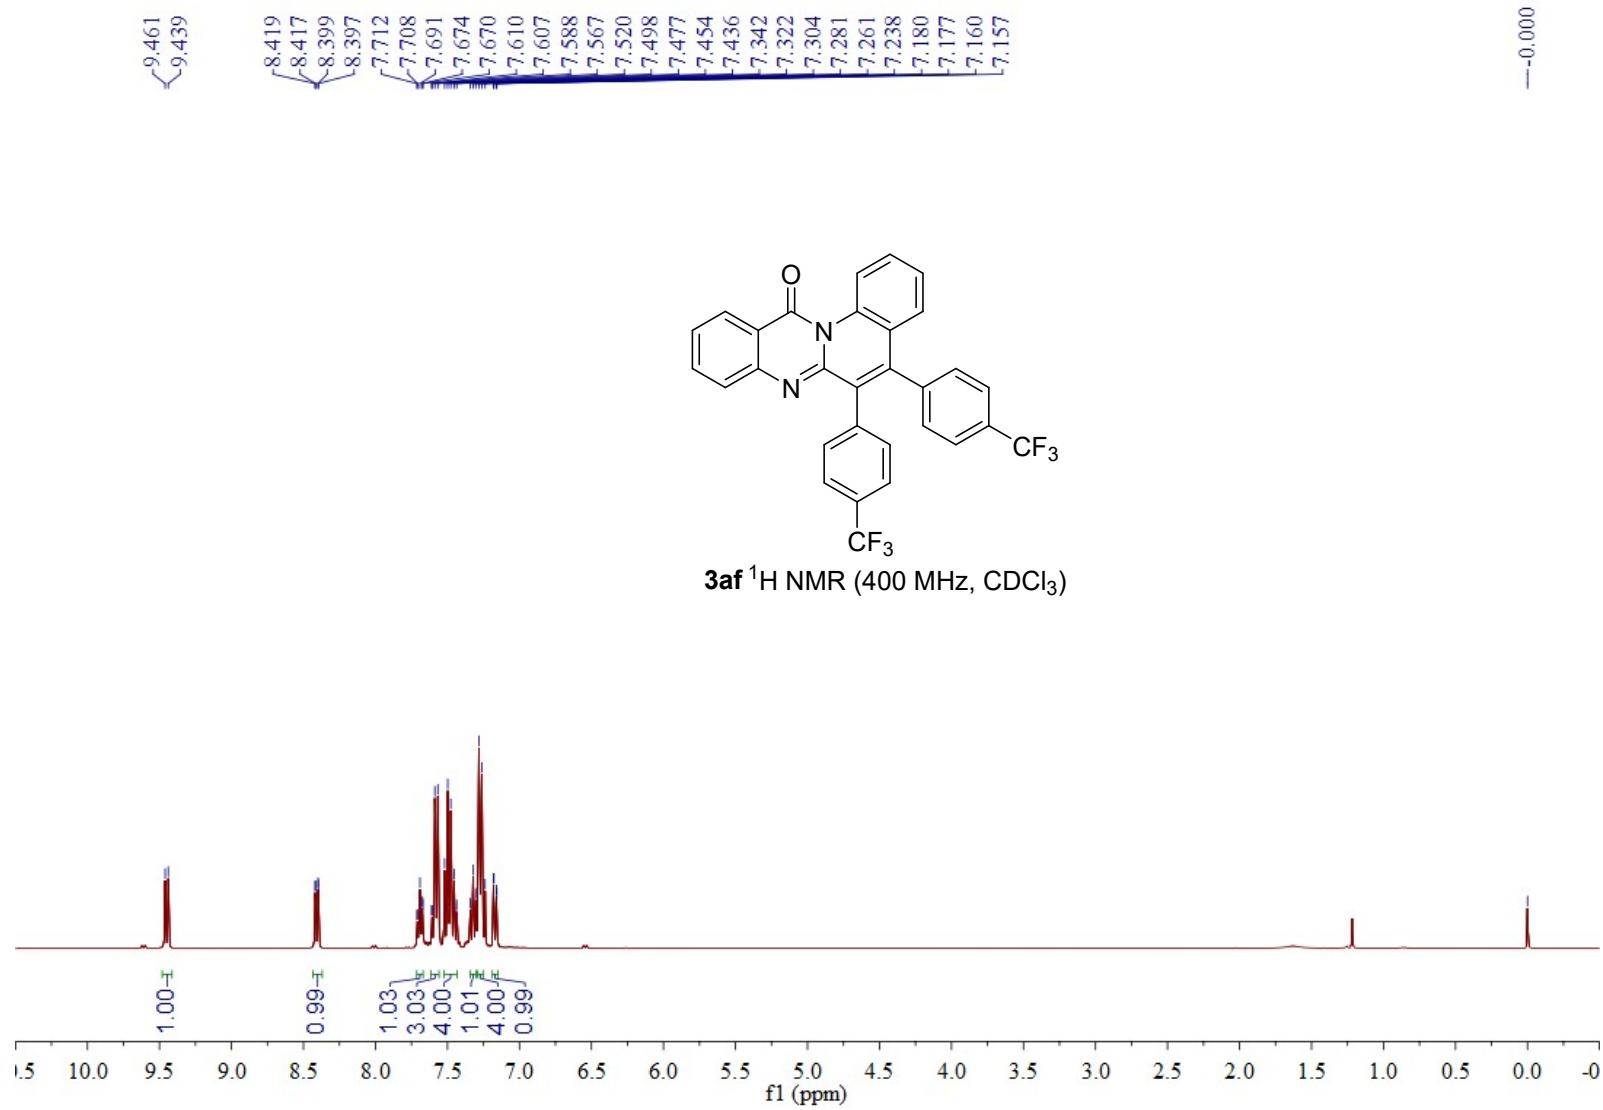



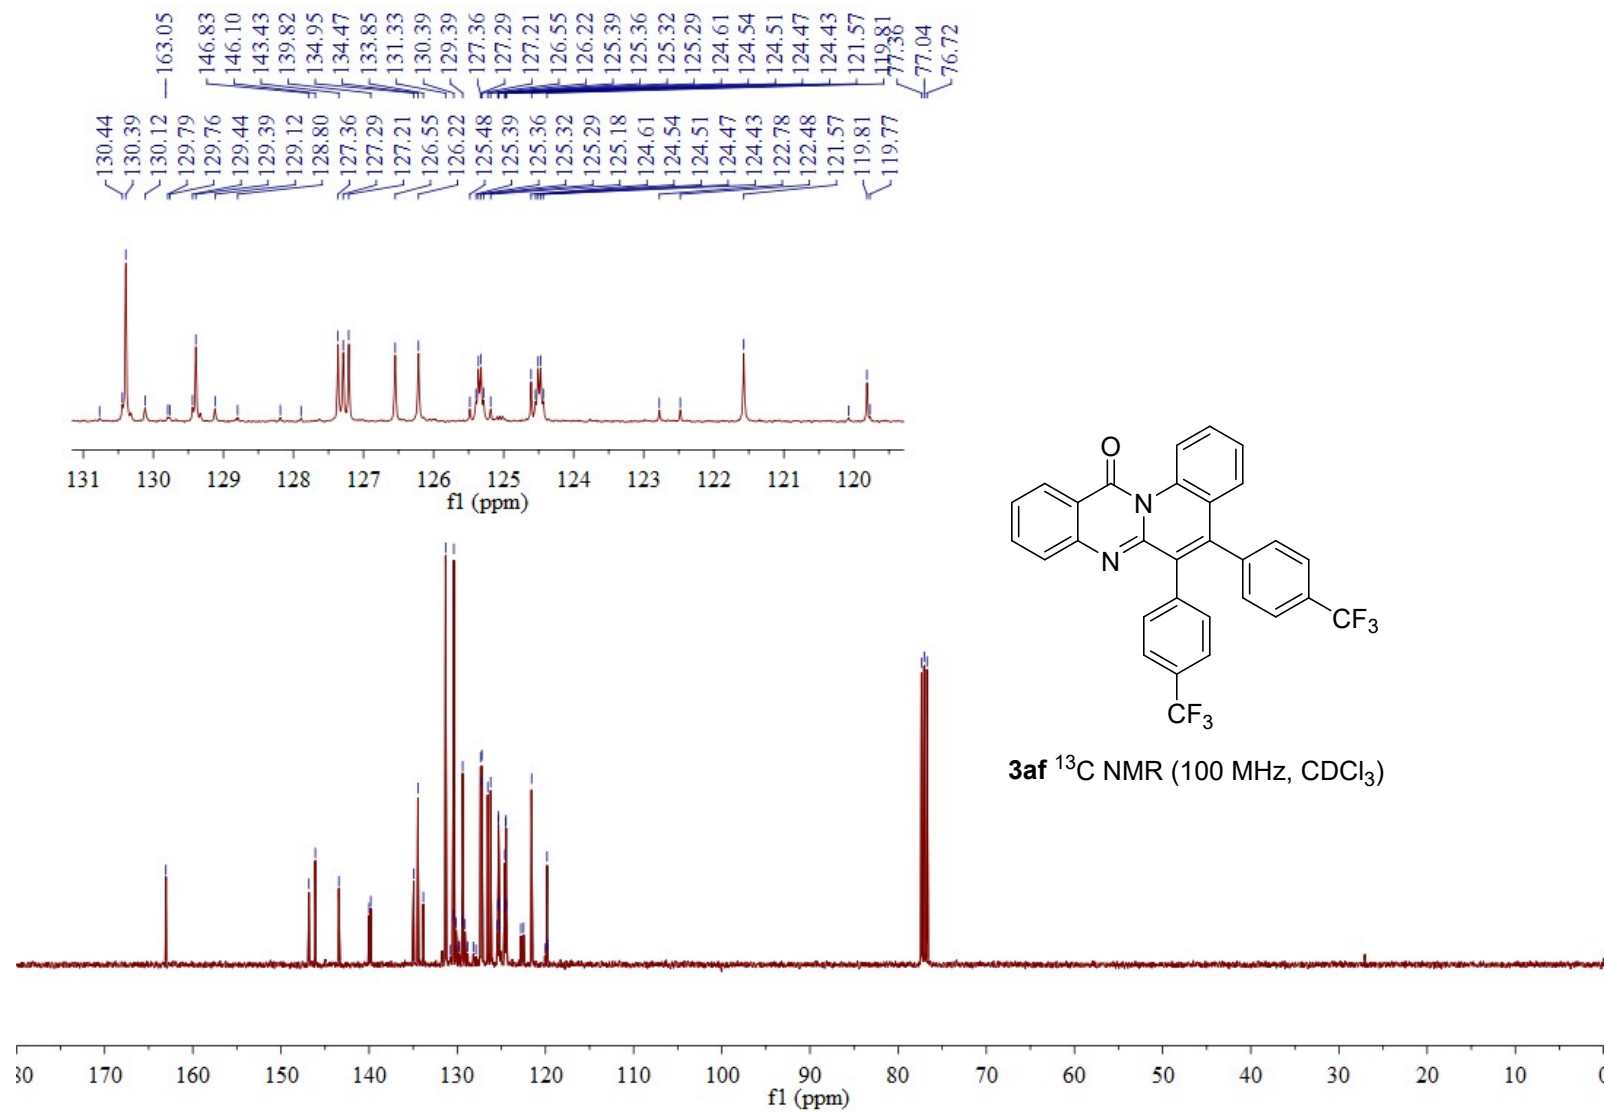

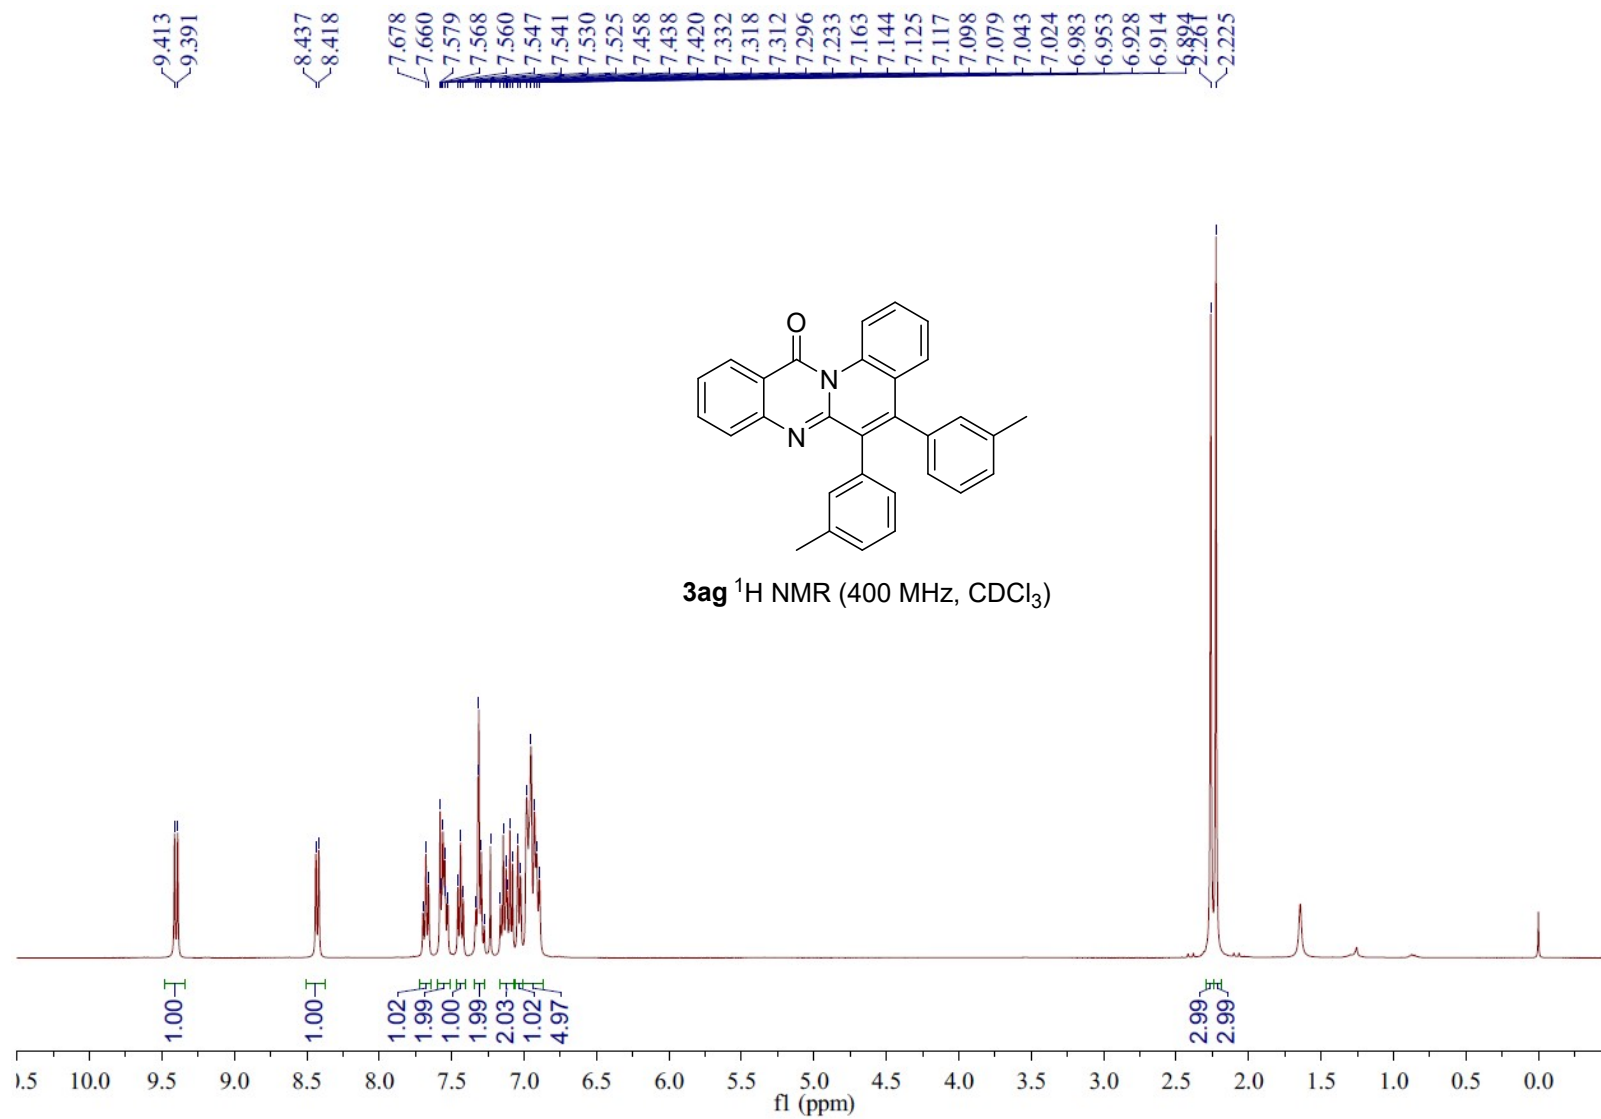

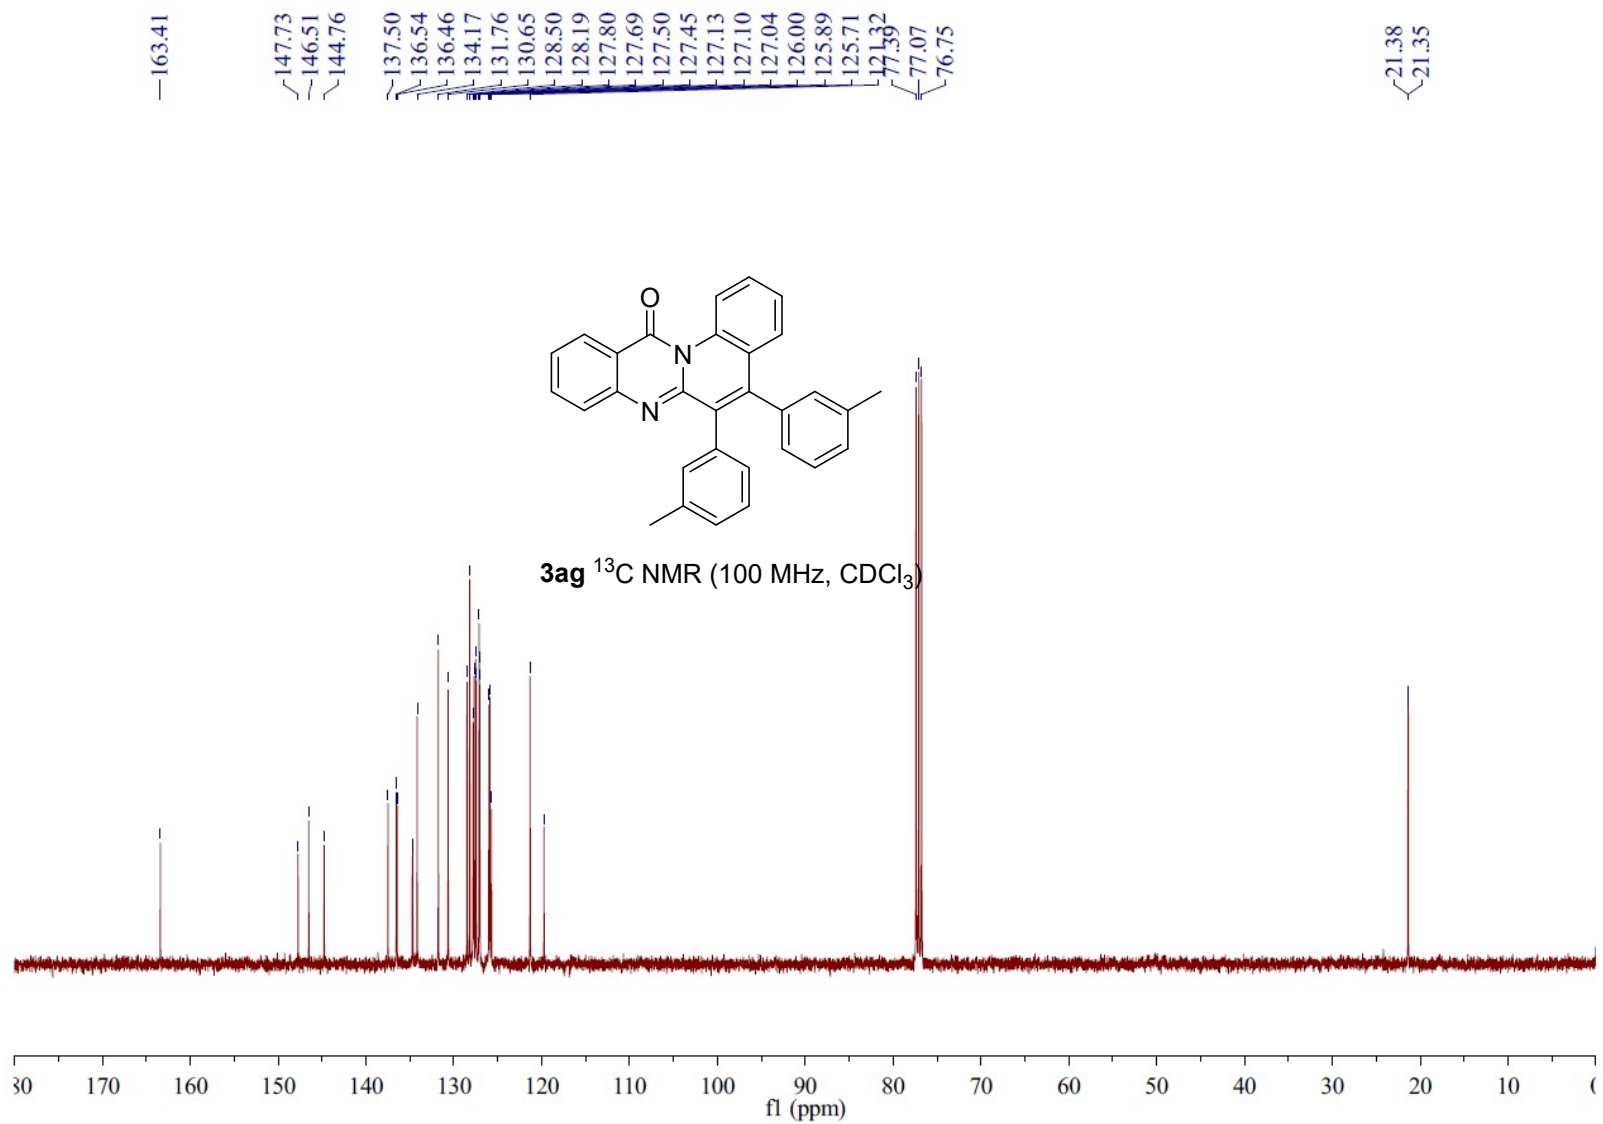

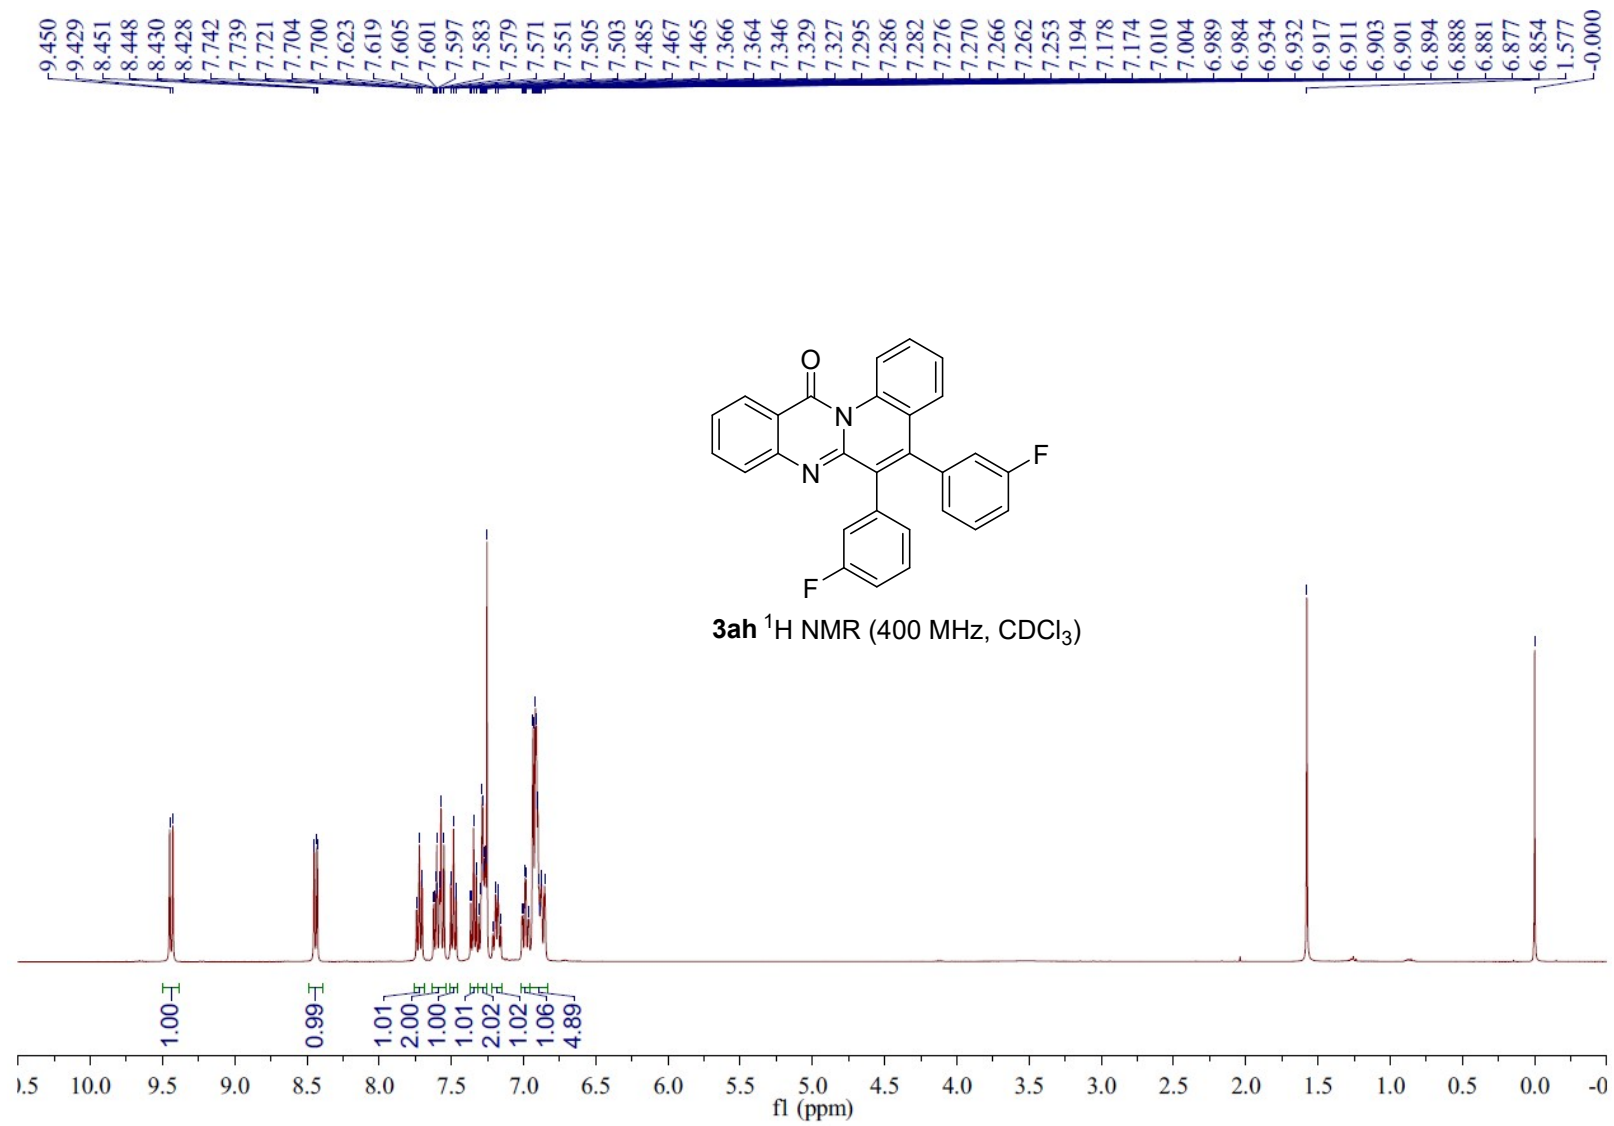

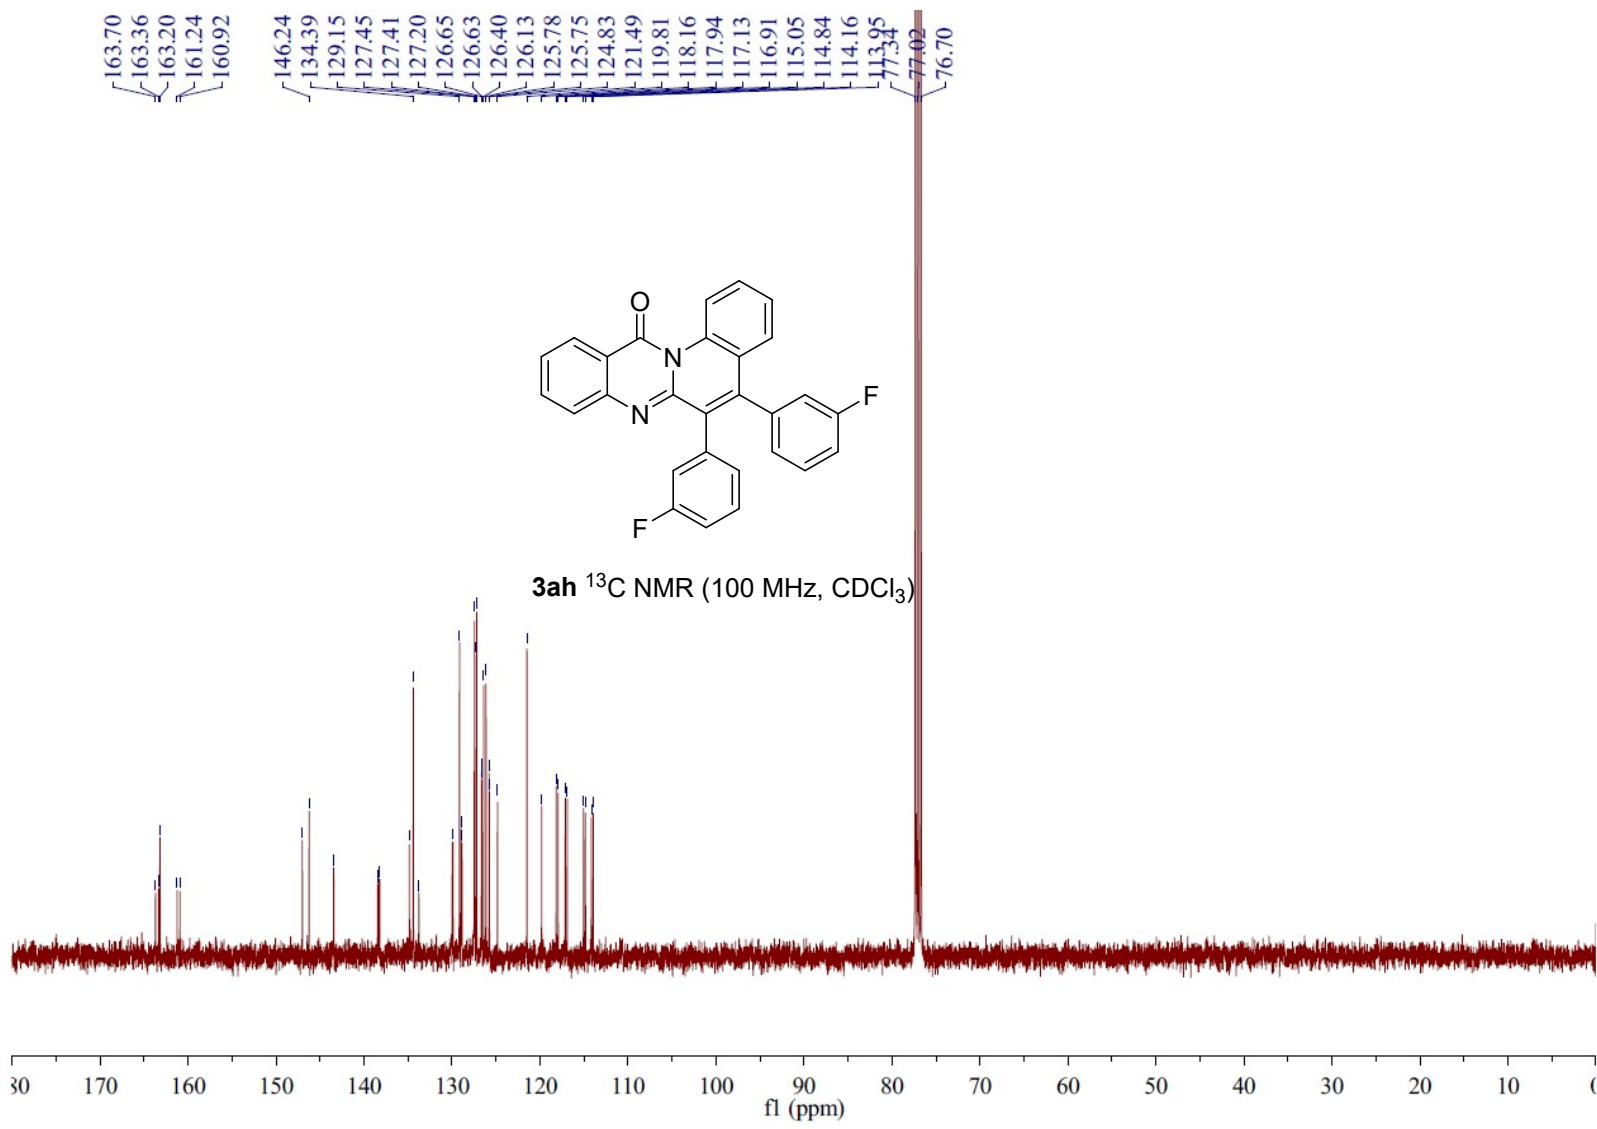

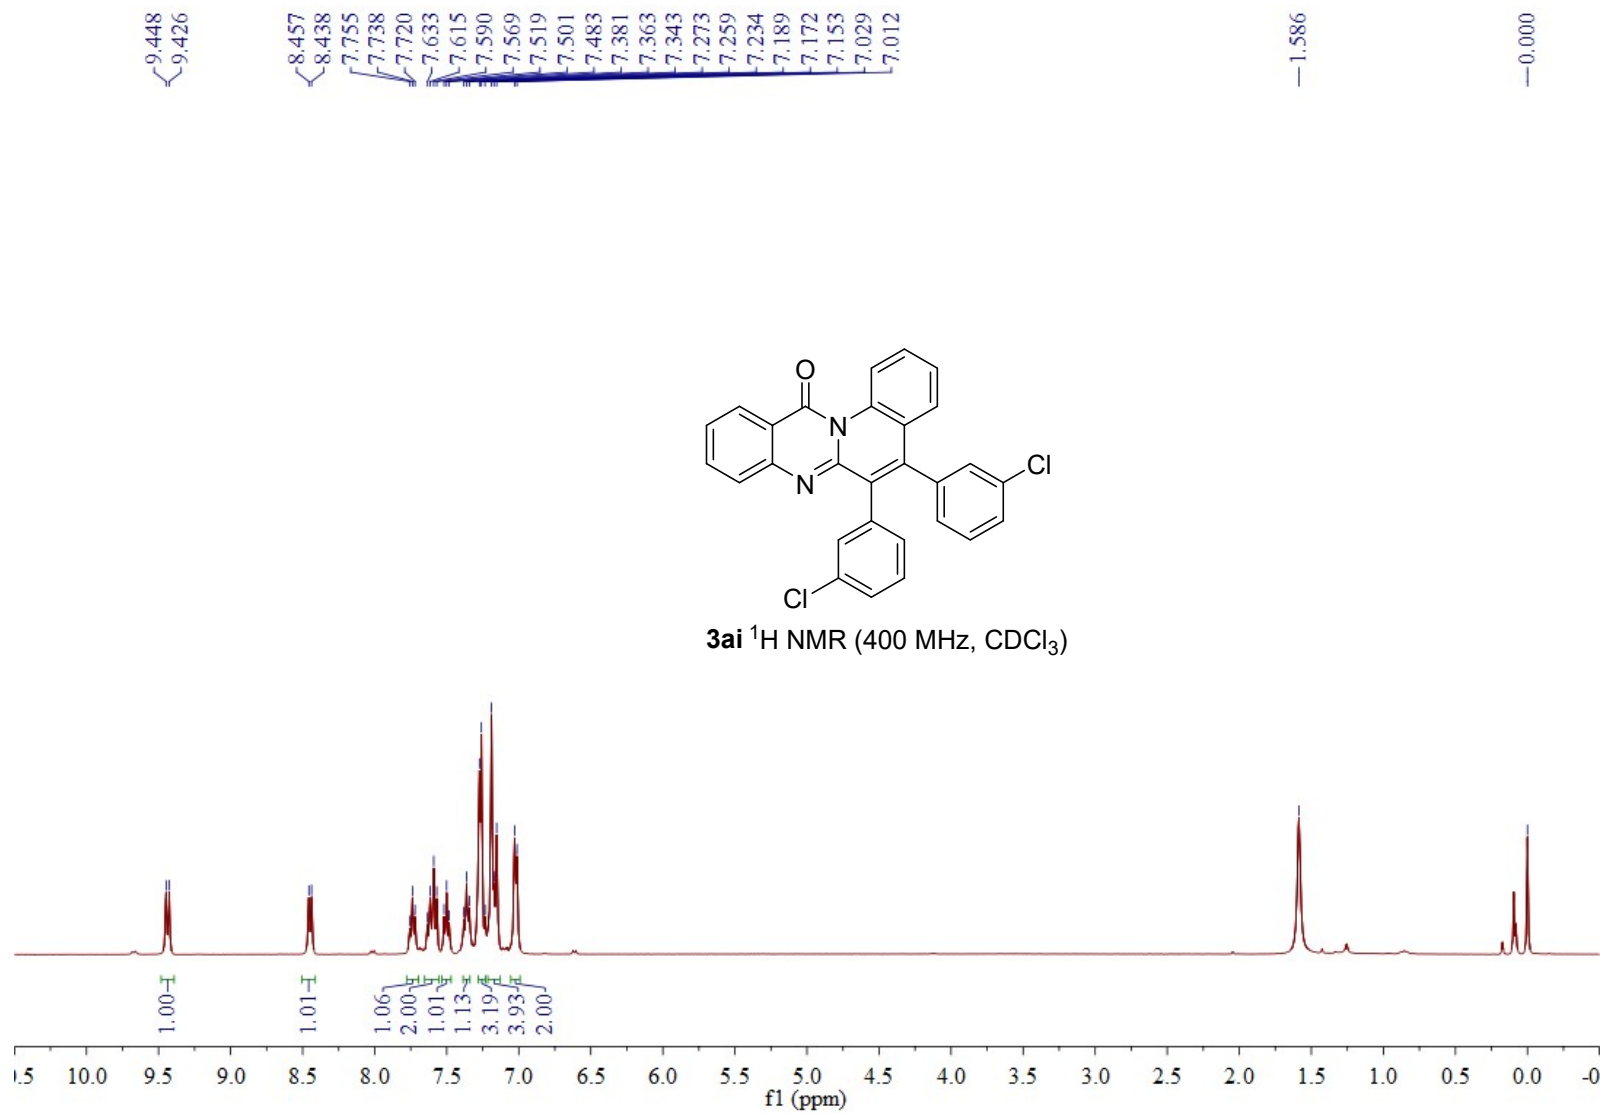

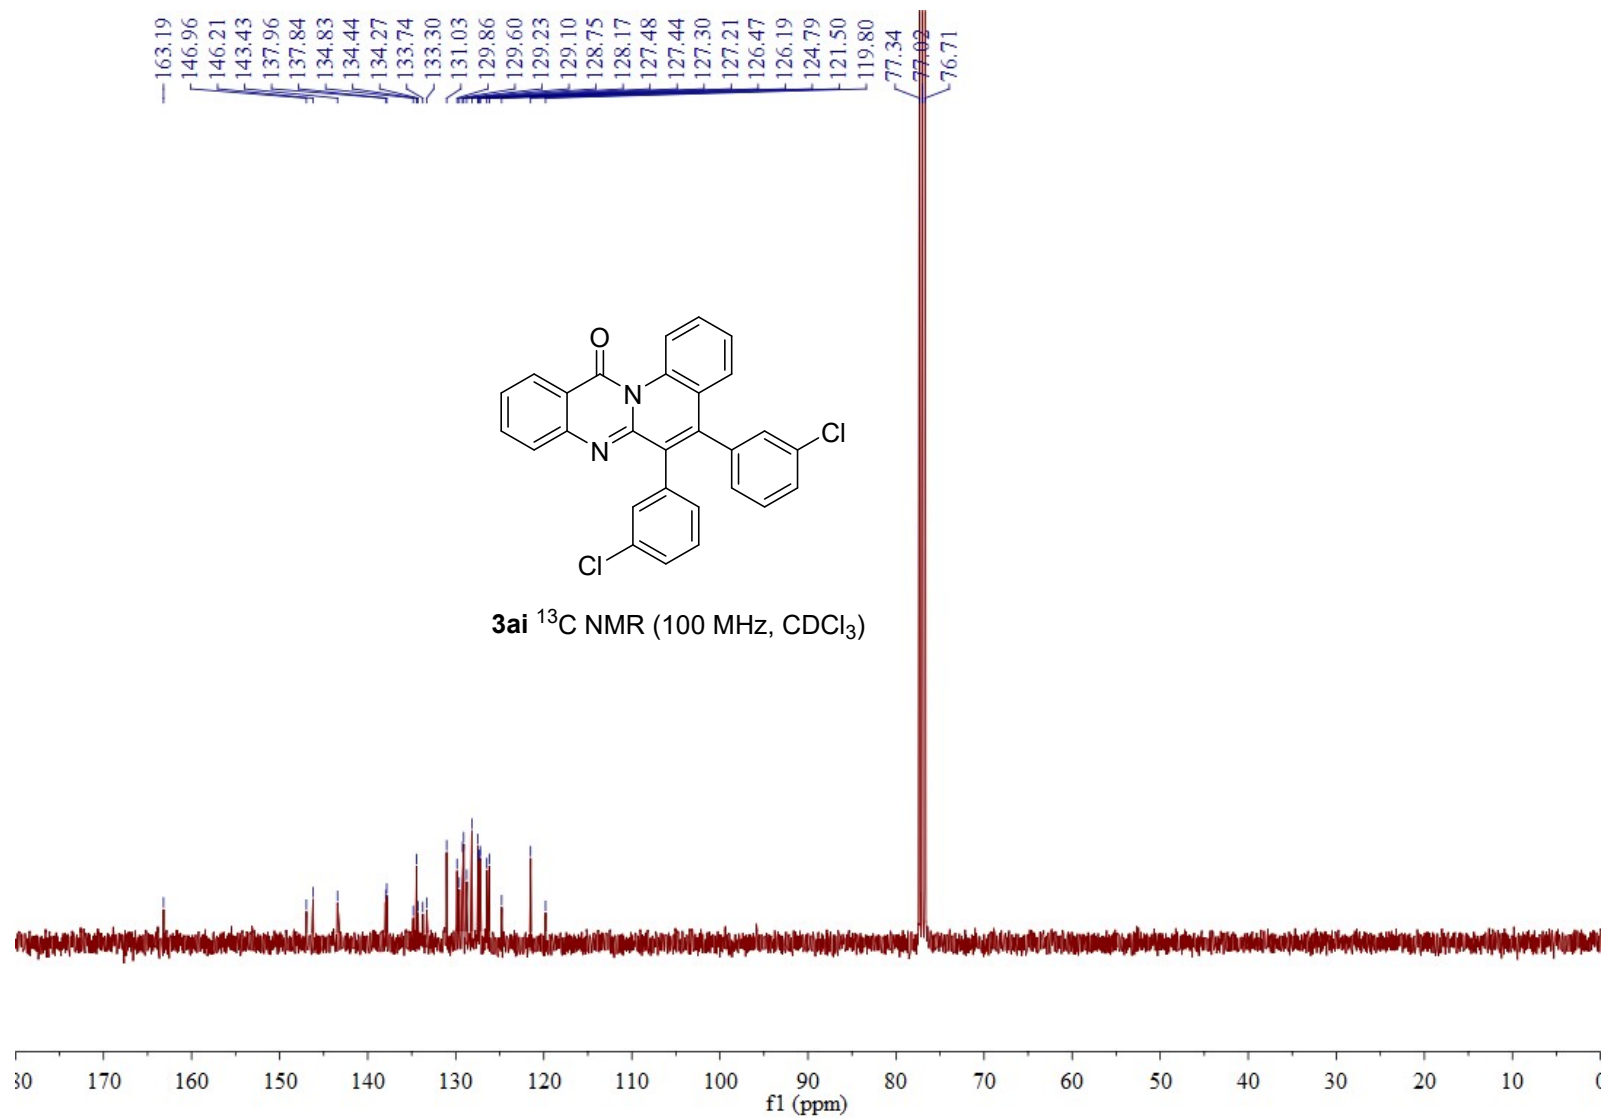

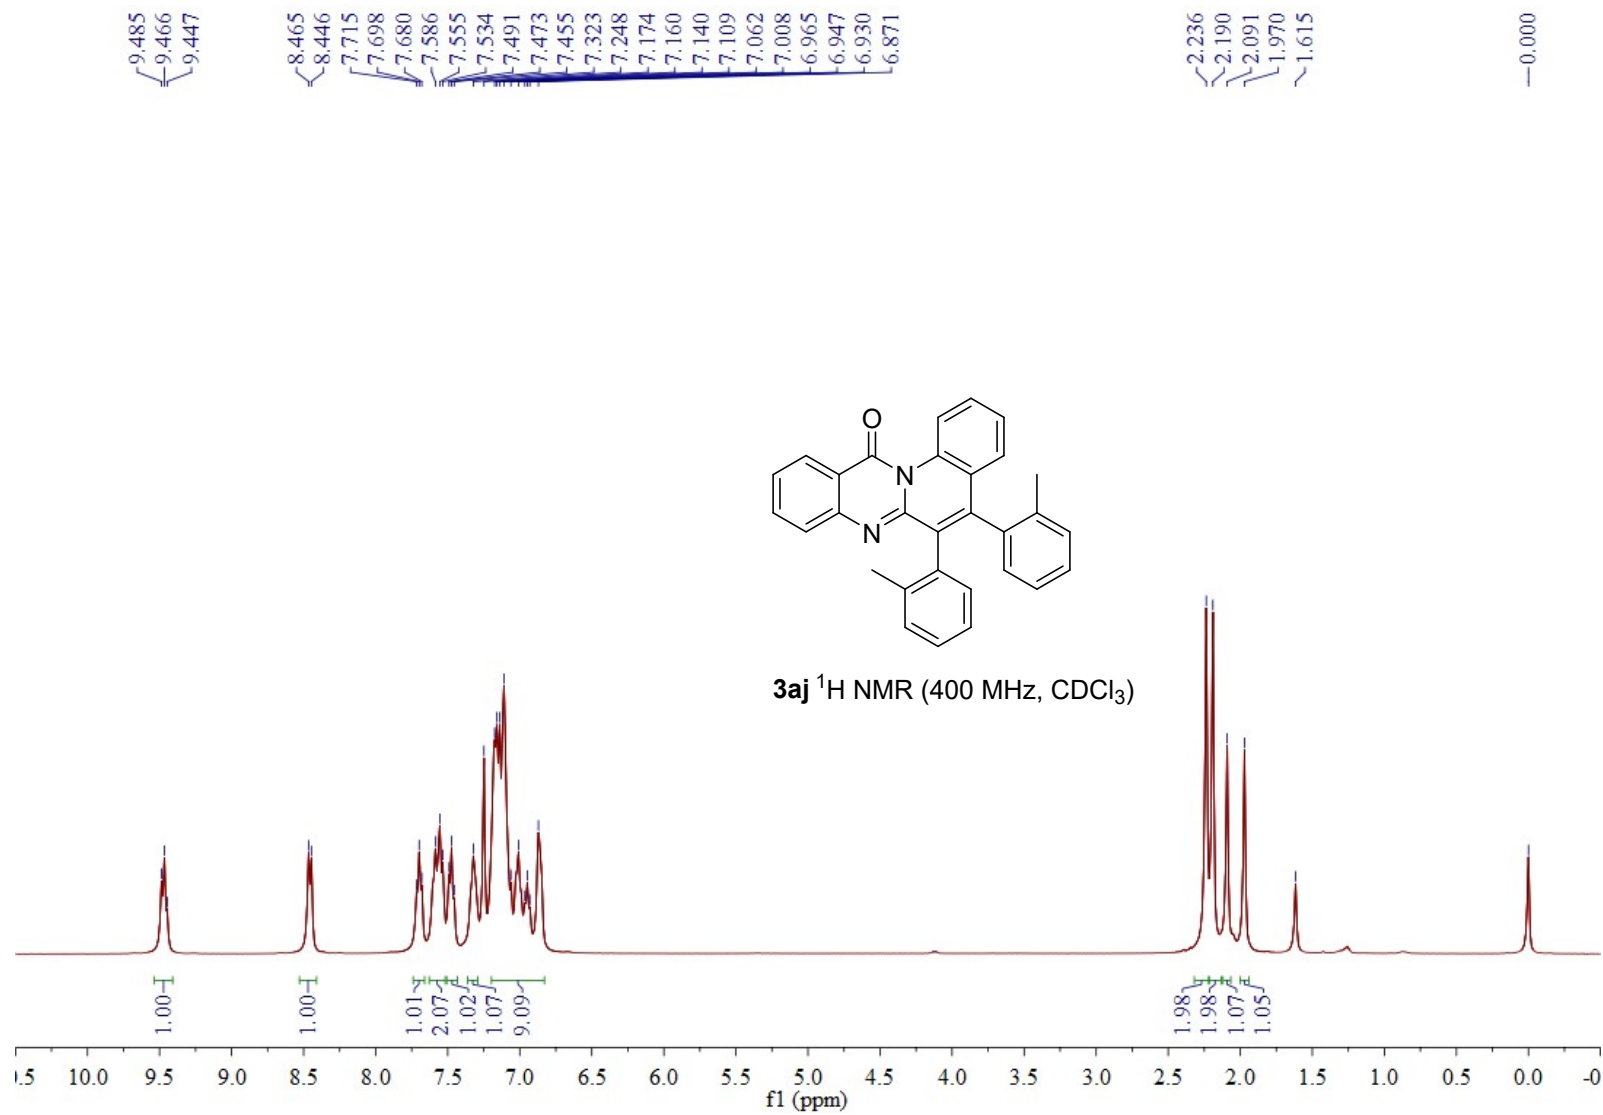



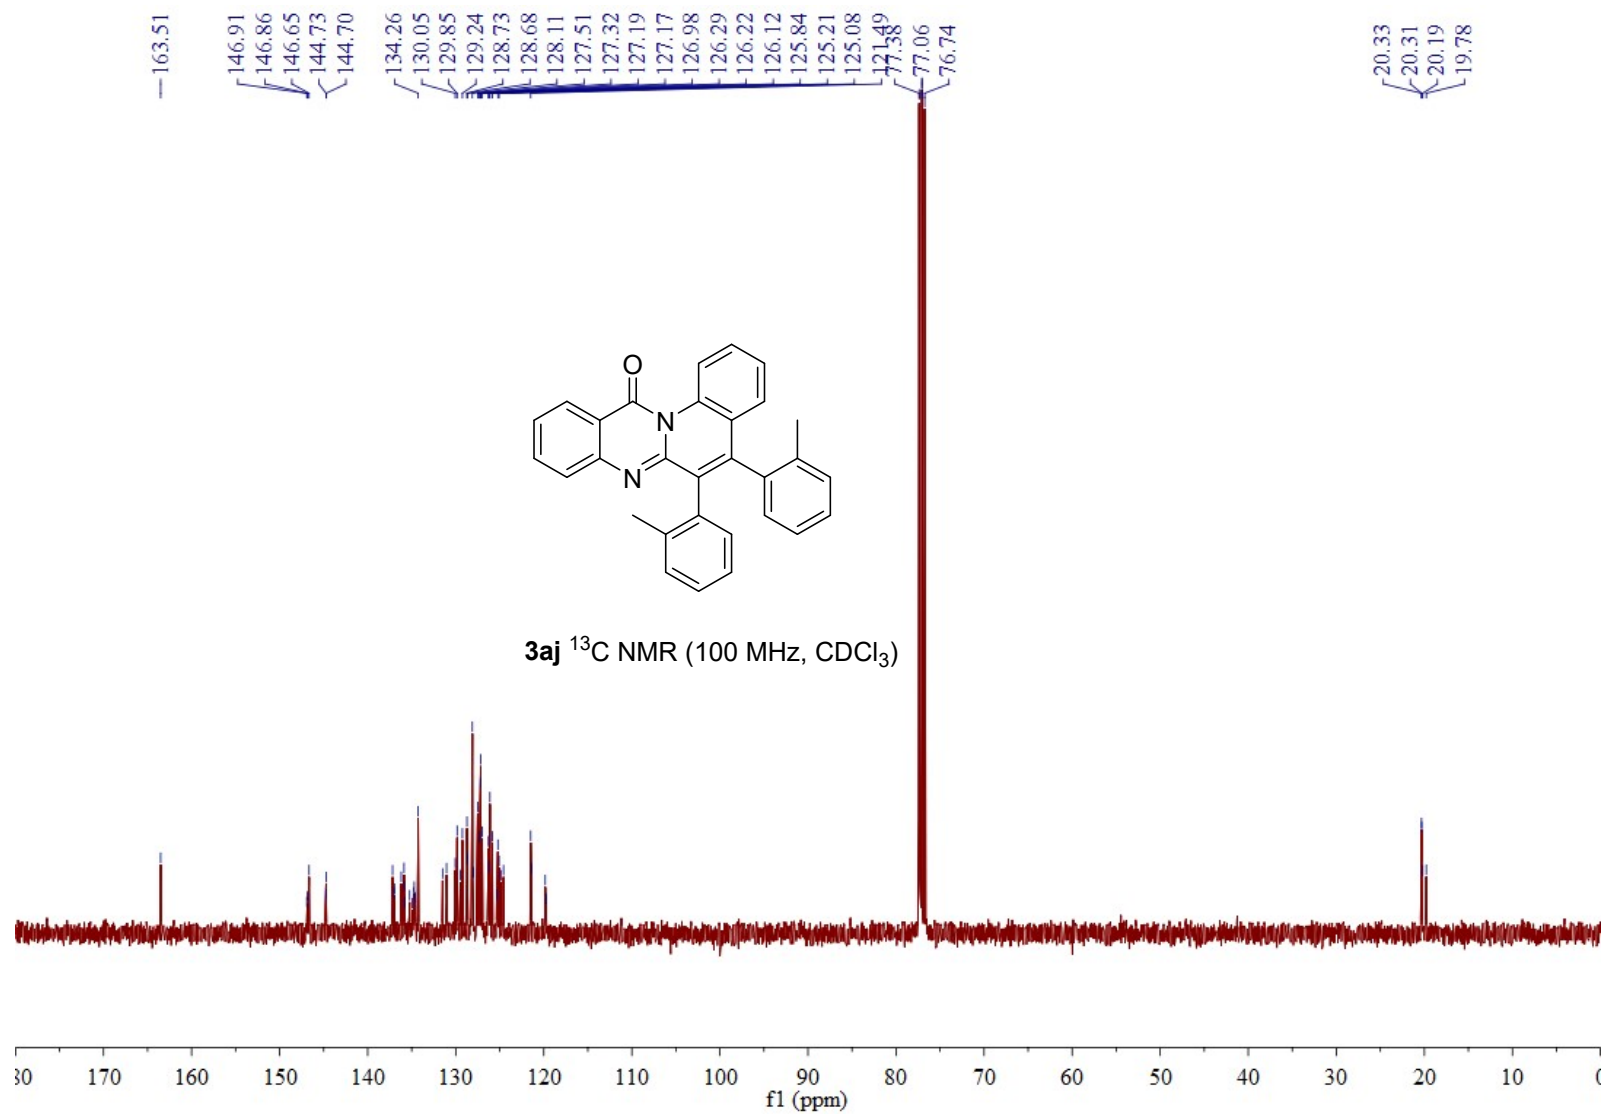

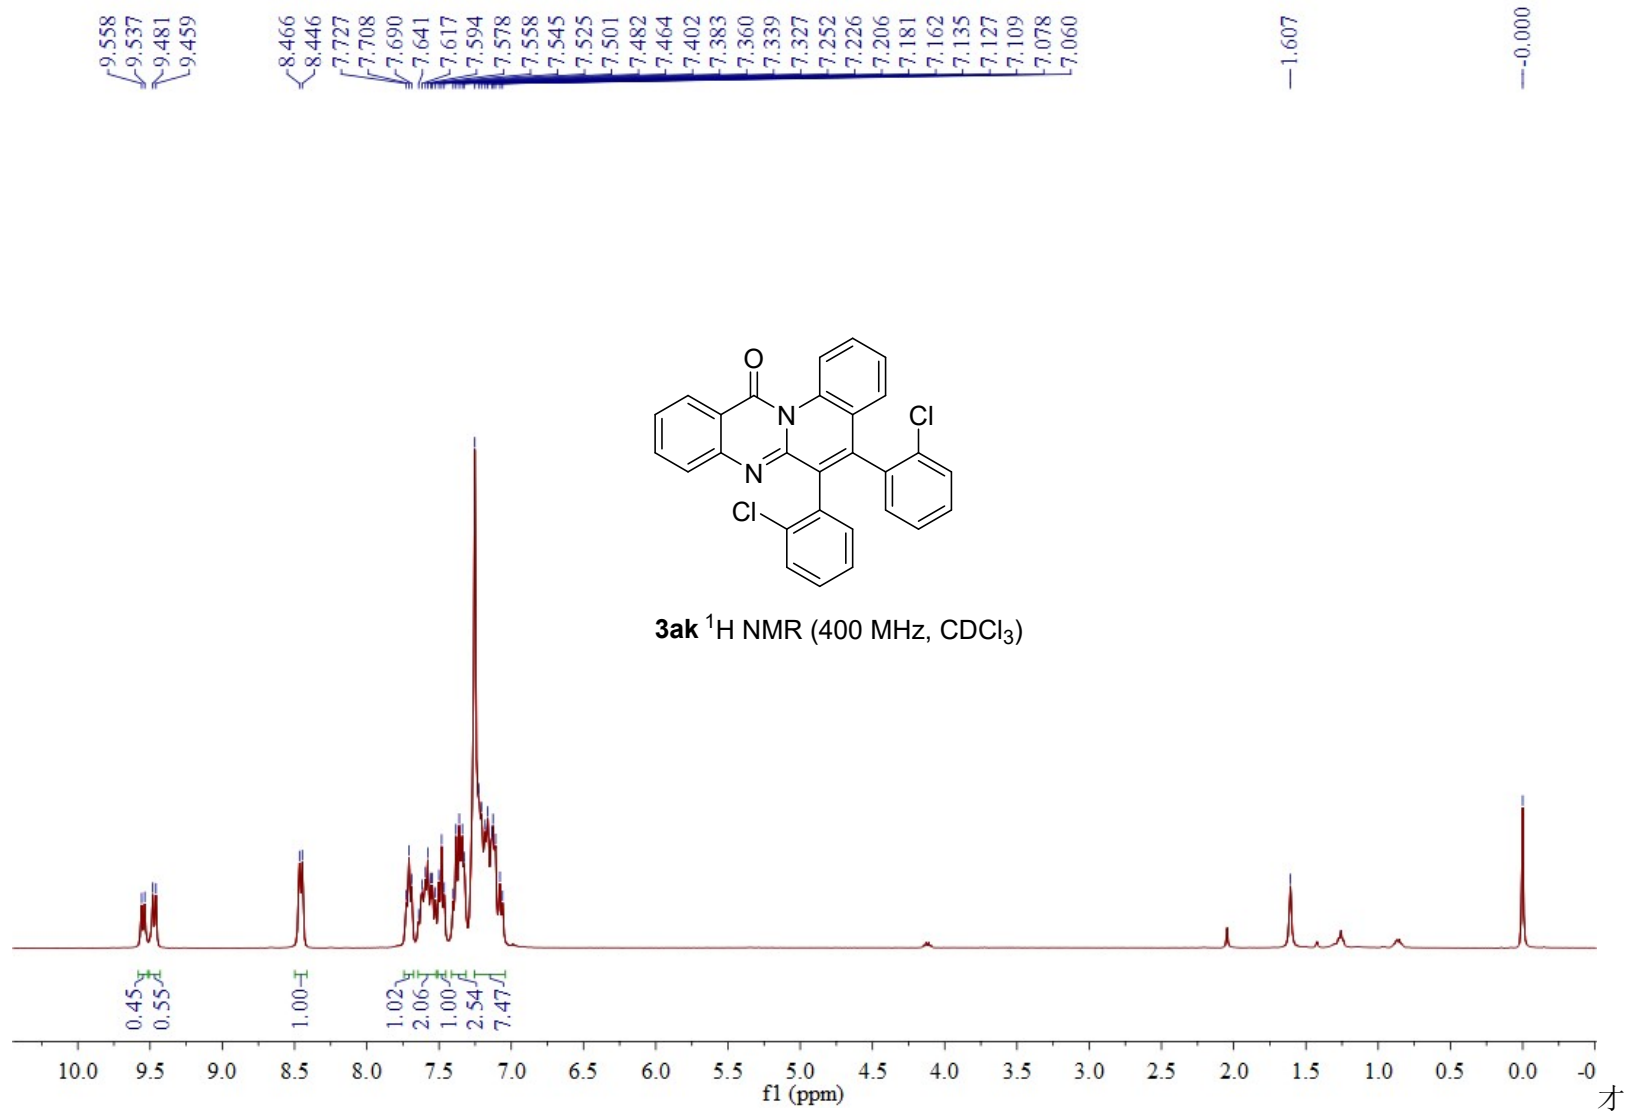

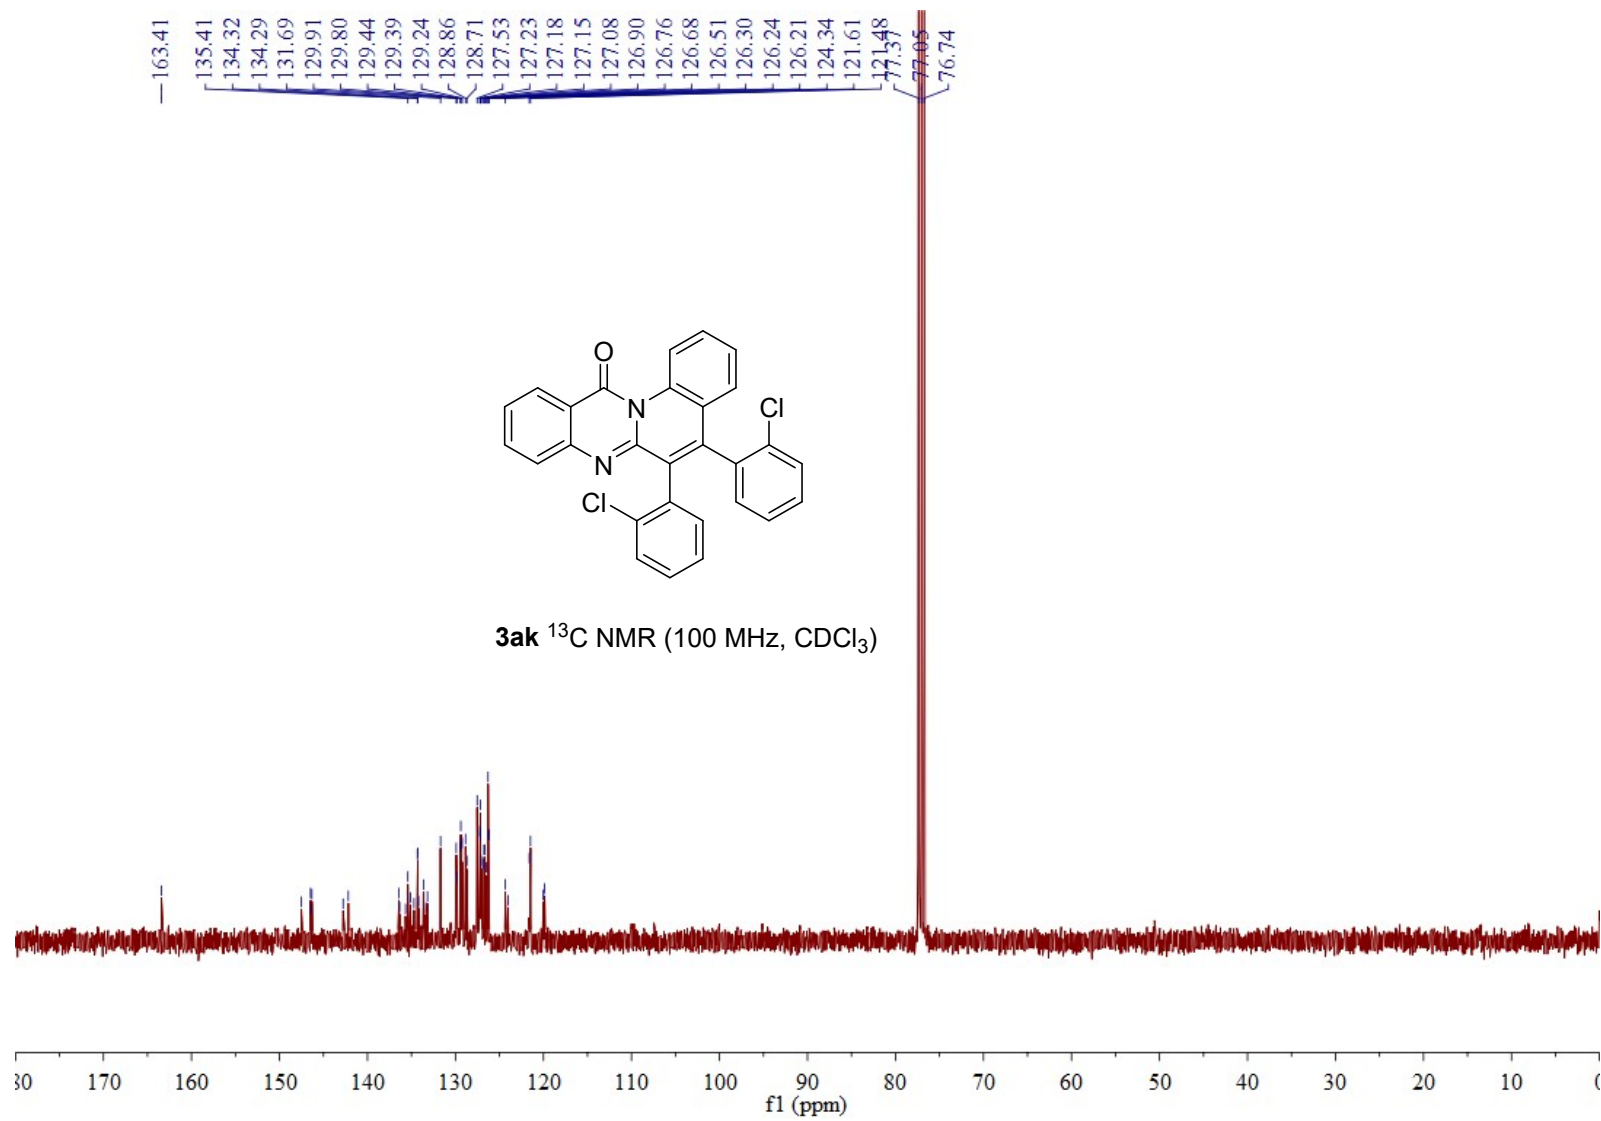

9.347  
9.326  
8.431  
8.411  
7.757  
7.739  
7.722  
7.689  
7.669  
7.600  
7.580  
7.573  
7.551  
7.501  
7.482  
7.464  
7.399  
7.397  
7.390  
7.388  
7.382  
7.357  
7.338  
7.246  
7.072  
7.063  
7.051  
7.033  
6.910  
6.904

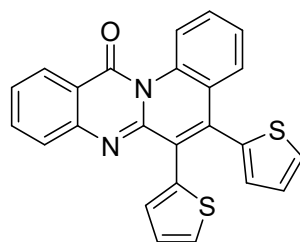

**3a1**  $^1\text{H}$  NMR (400 MHz,  $\text{CDCl}_3$ )

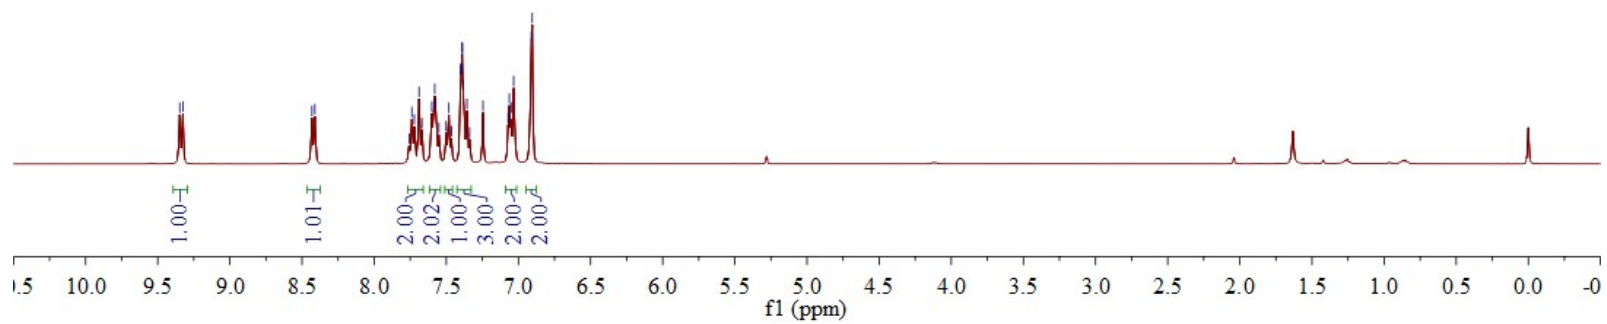

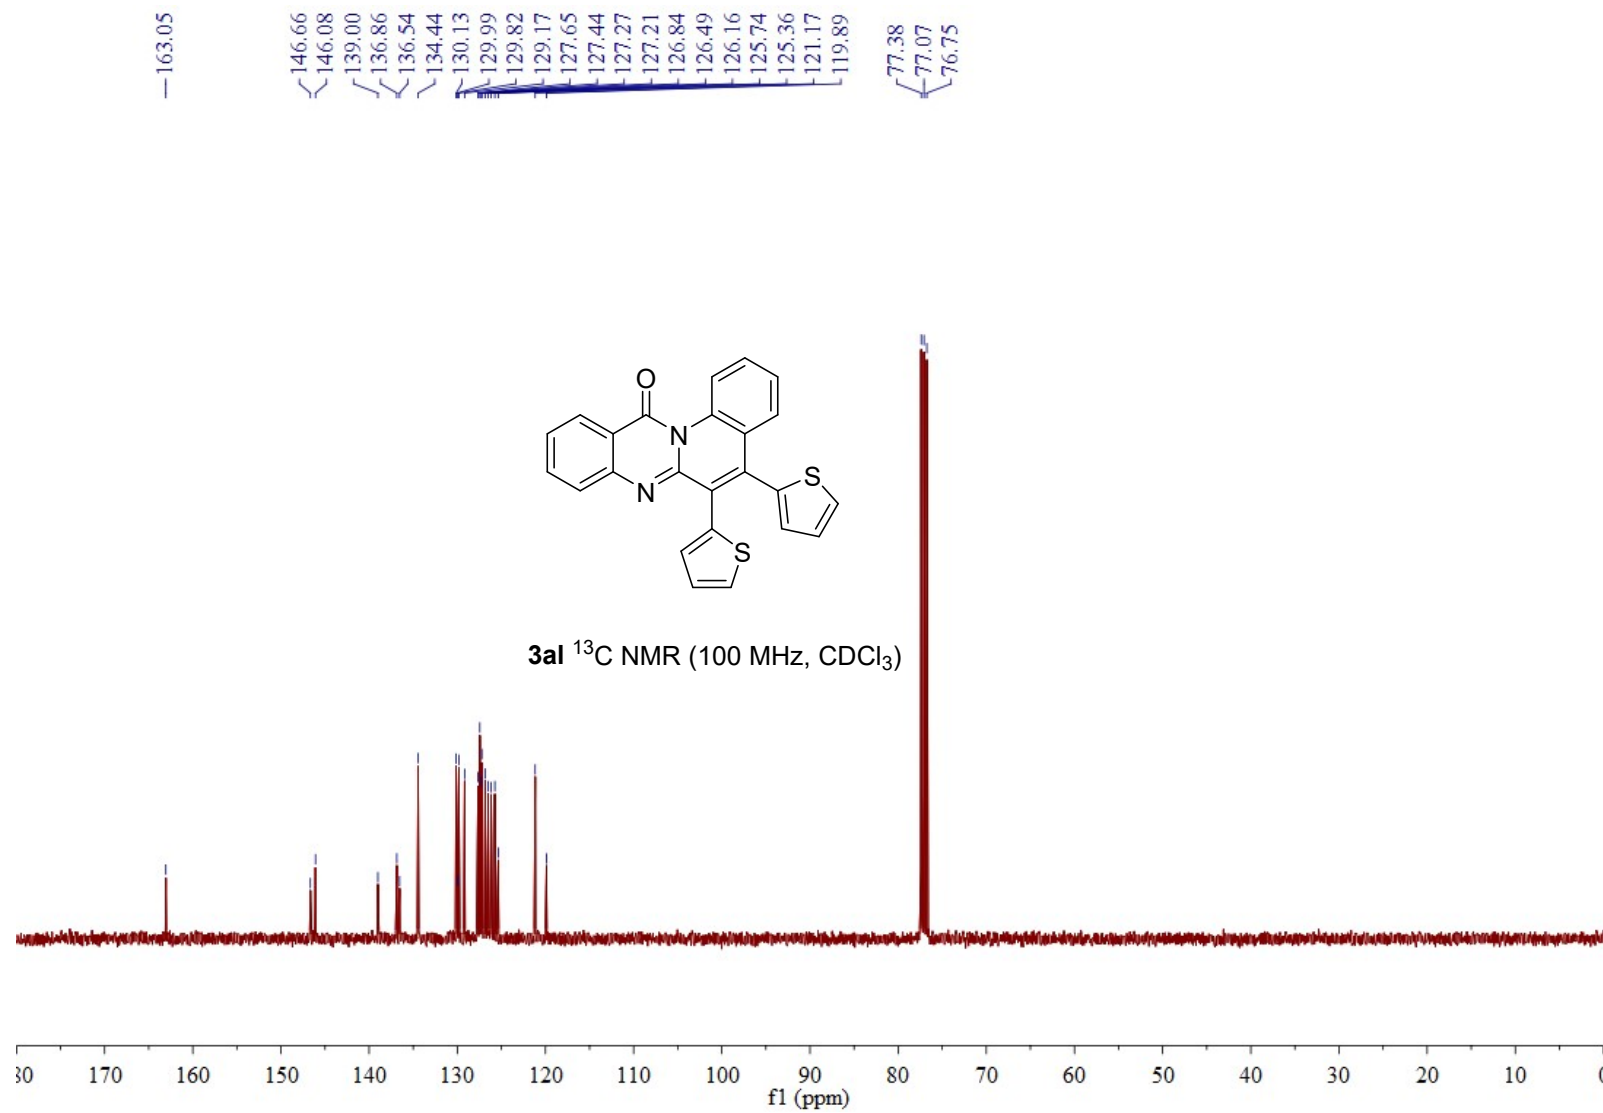

9.295  
9.274  
8.410  
8.390  
7.823  
7.803  
7.767  
7.754  
7.514  
7.496  
7.471  
7.459  
7.441  
7.252

3.151  
3.133  
3.115  
3.096  
3.025  
3.006  
2.987  
2.968

1.345  
1.326  
1.307  
1.295  
1.277  
1.258

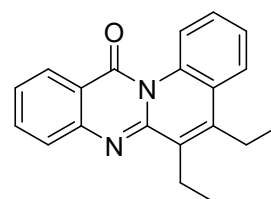

**3am**  $^1\text{H}$  NMR (400 MHz,  $\text{CDCl}_3$ )

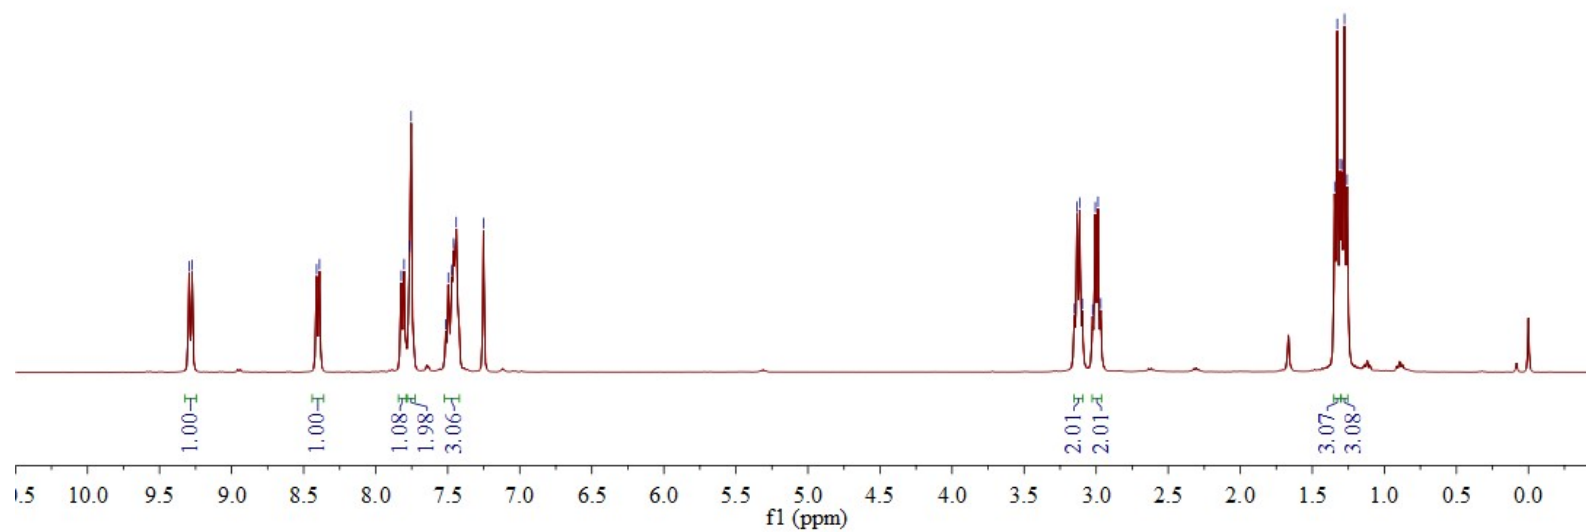

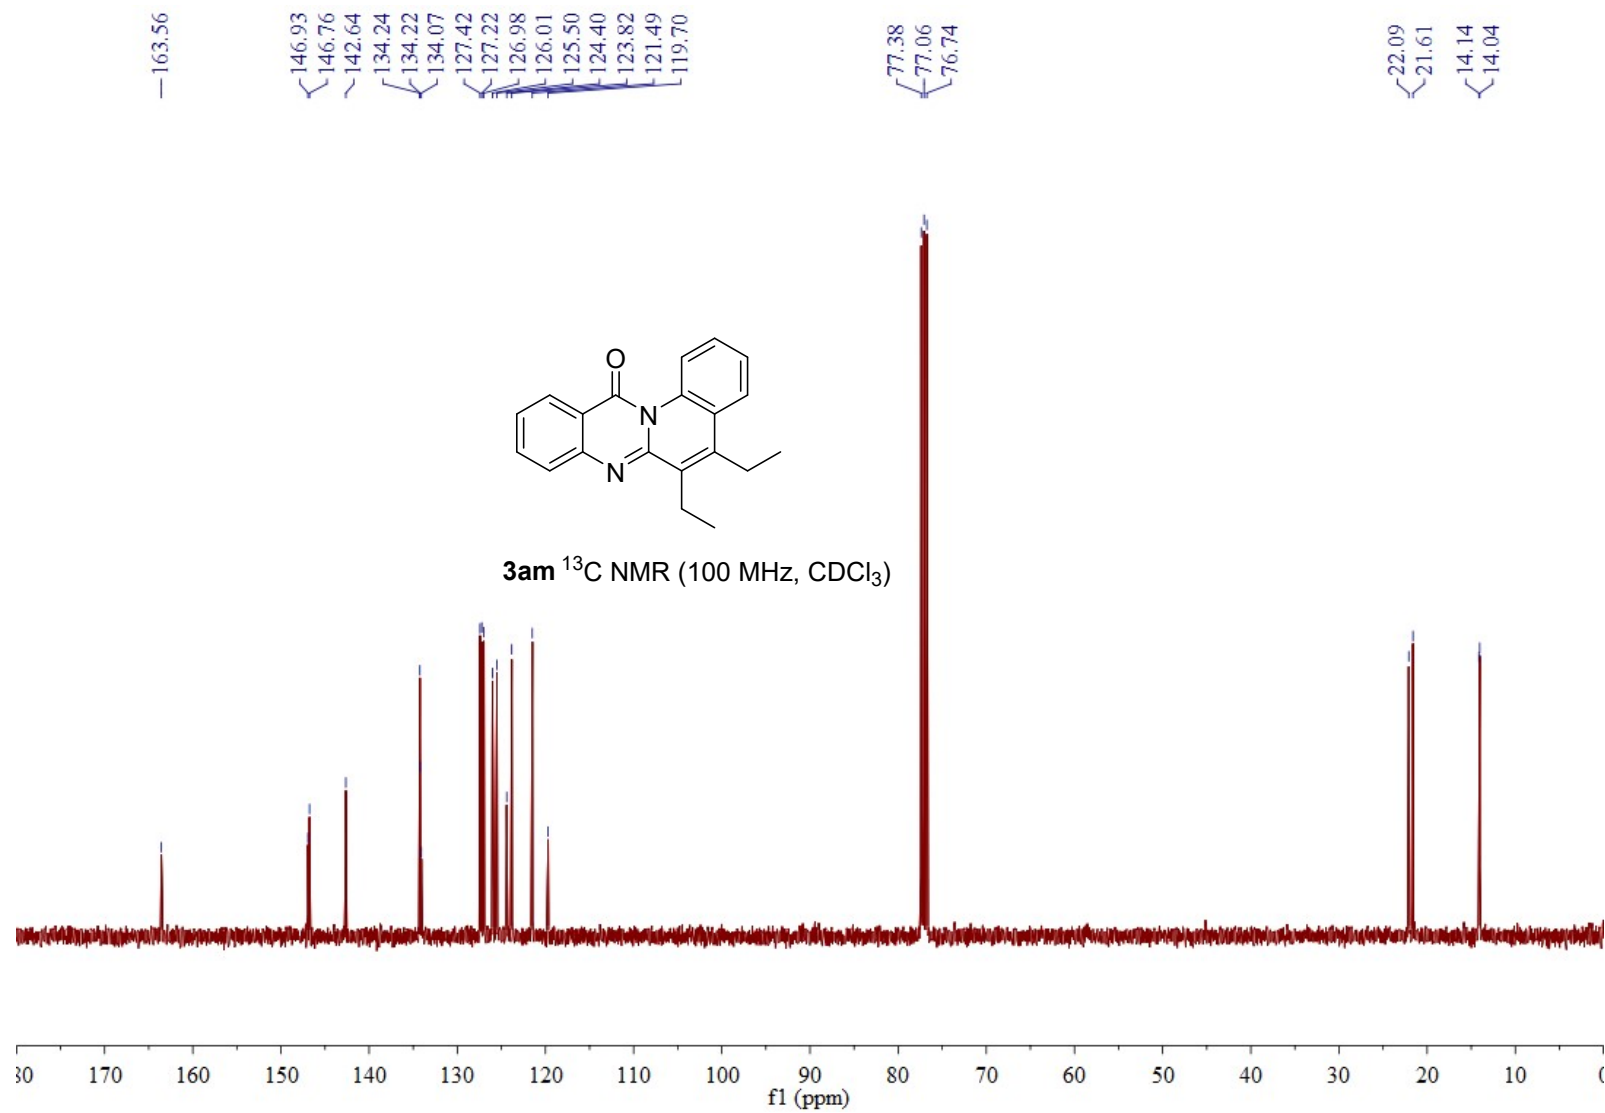

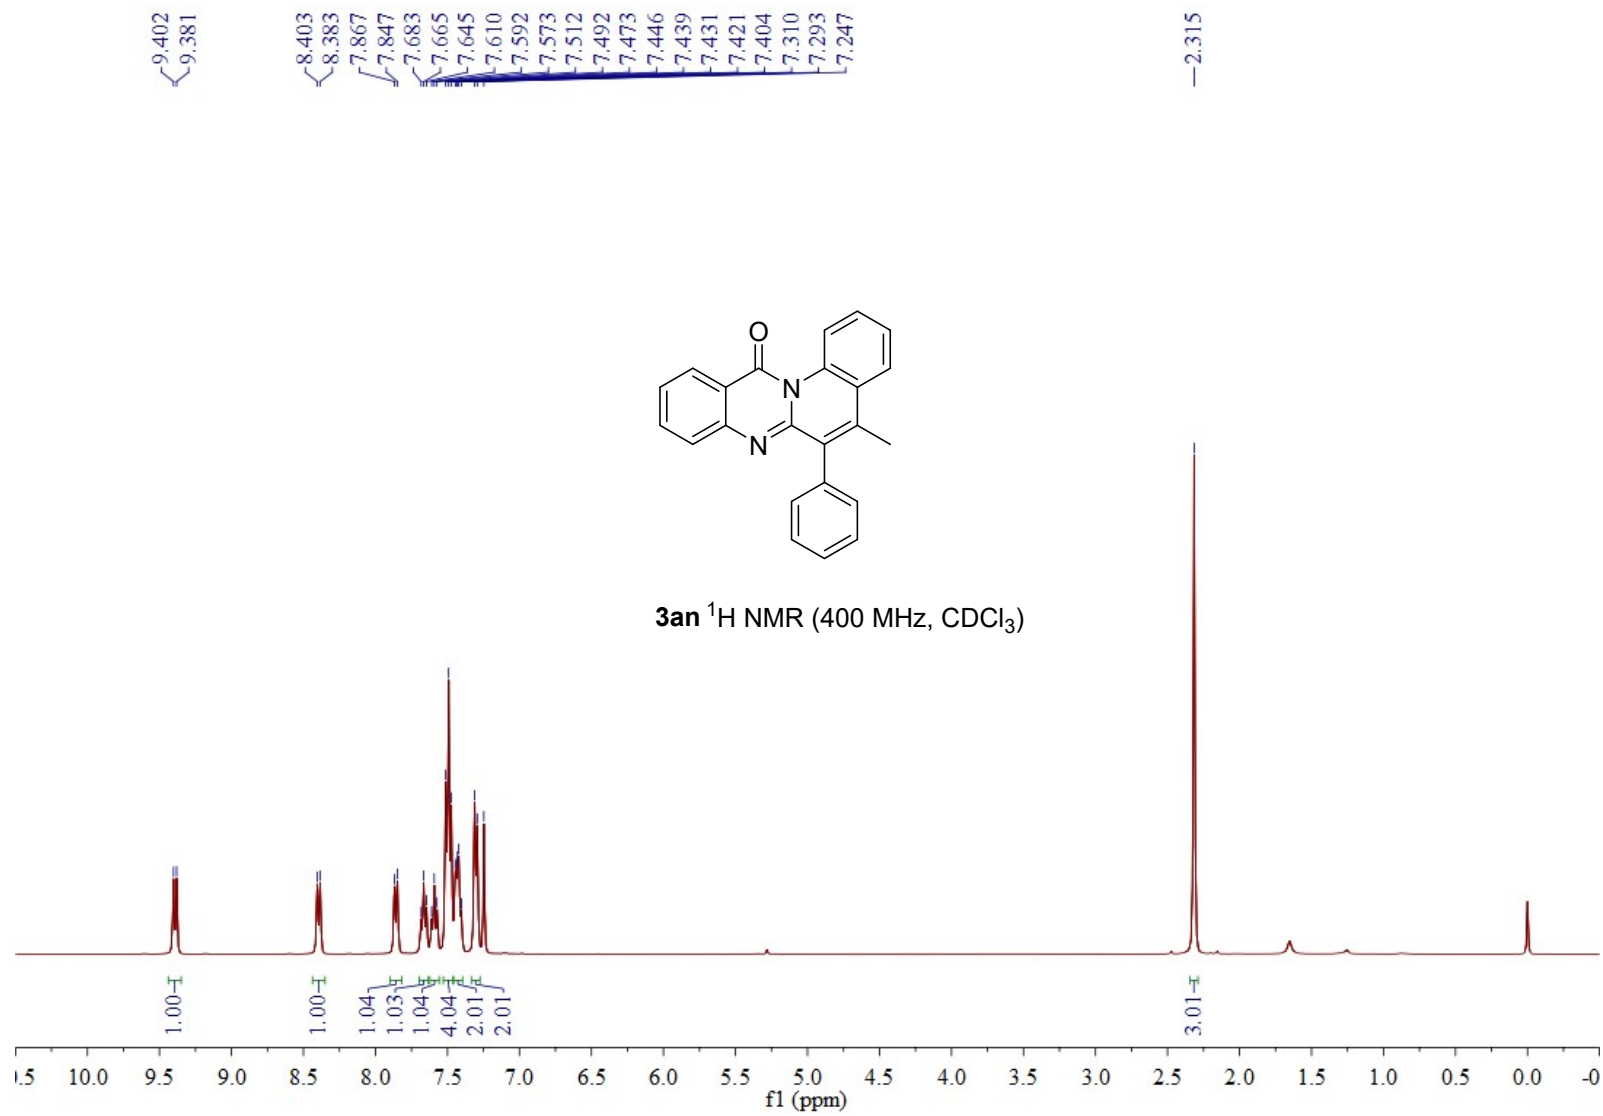



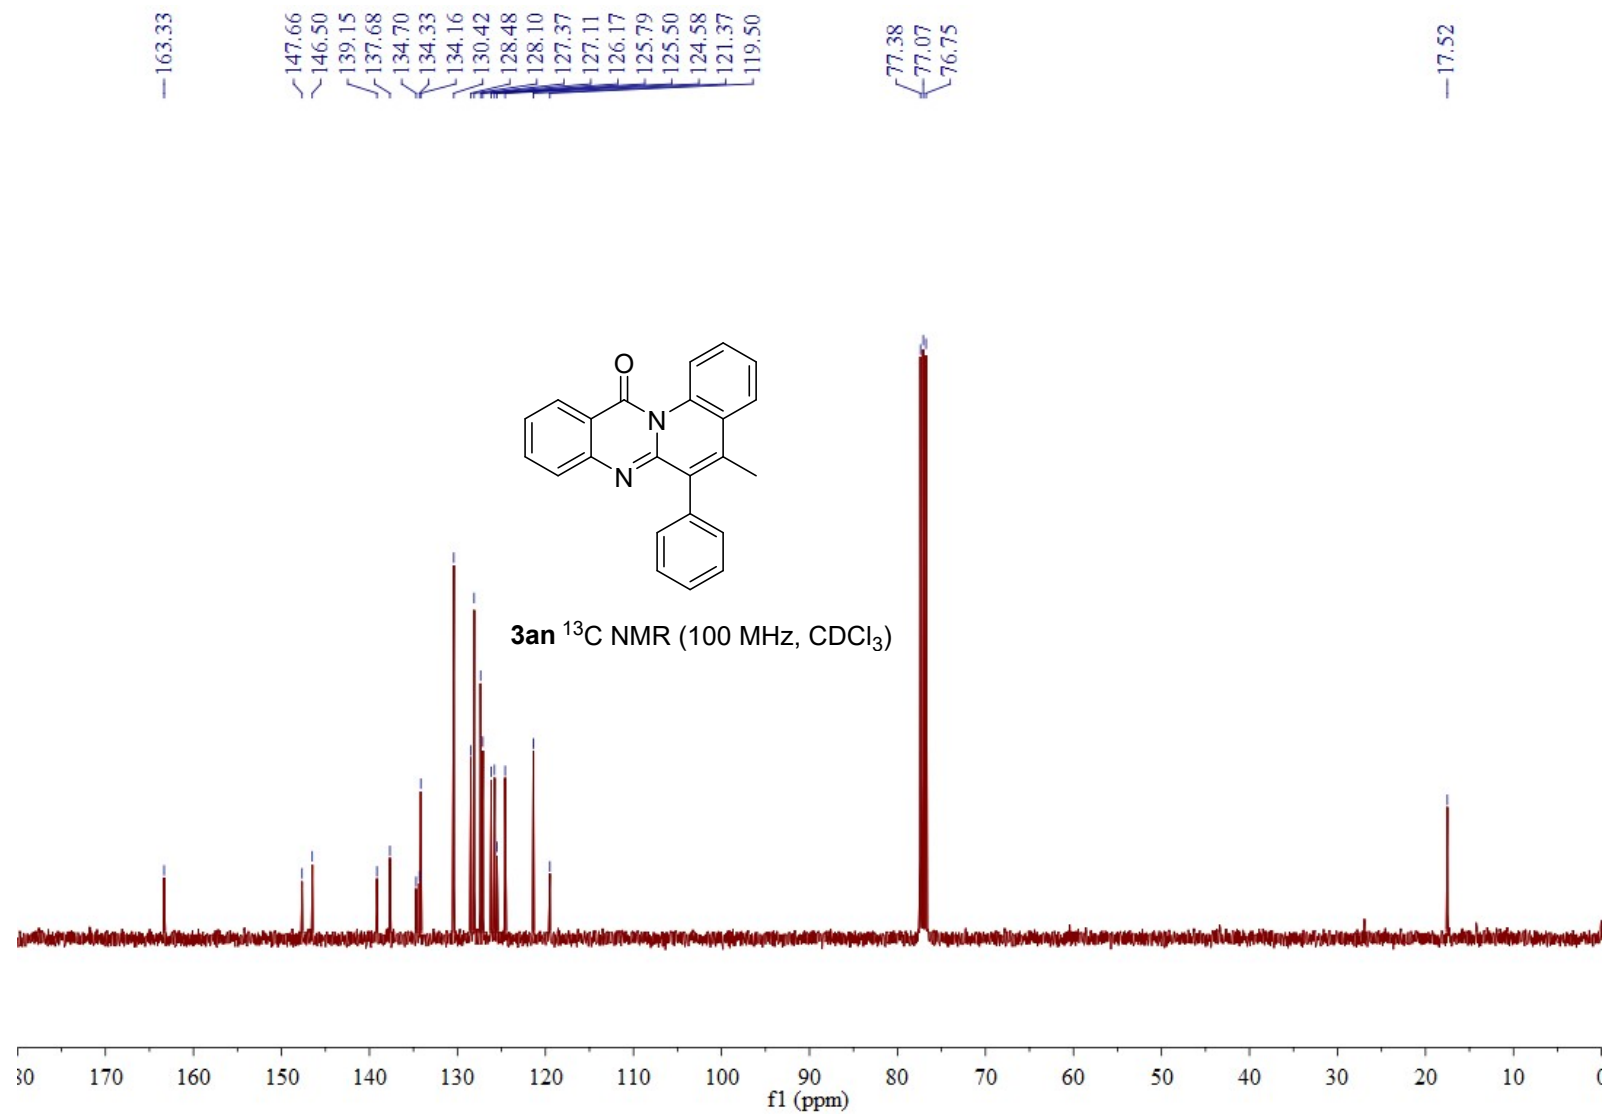

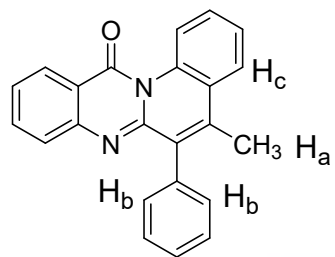

3an

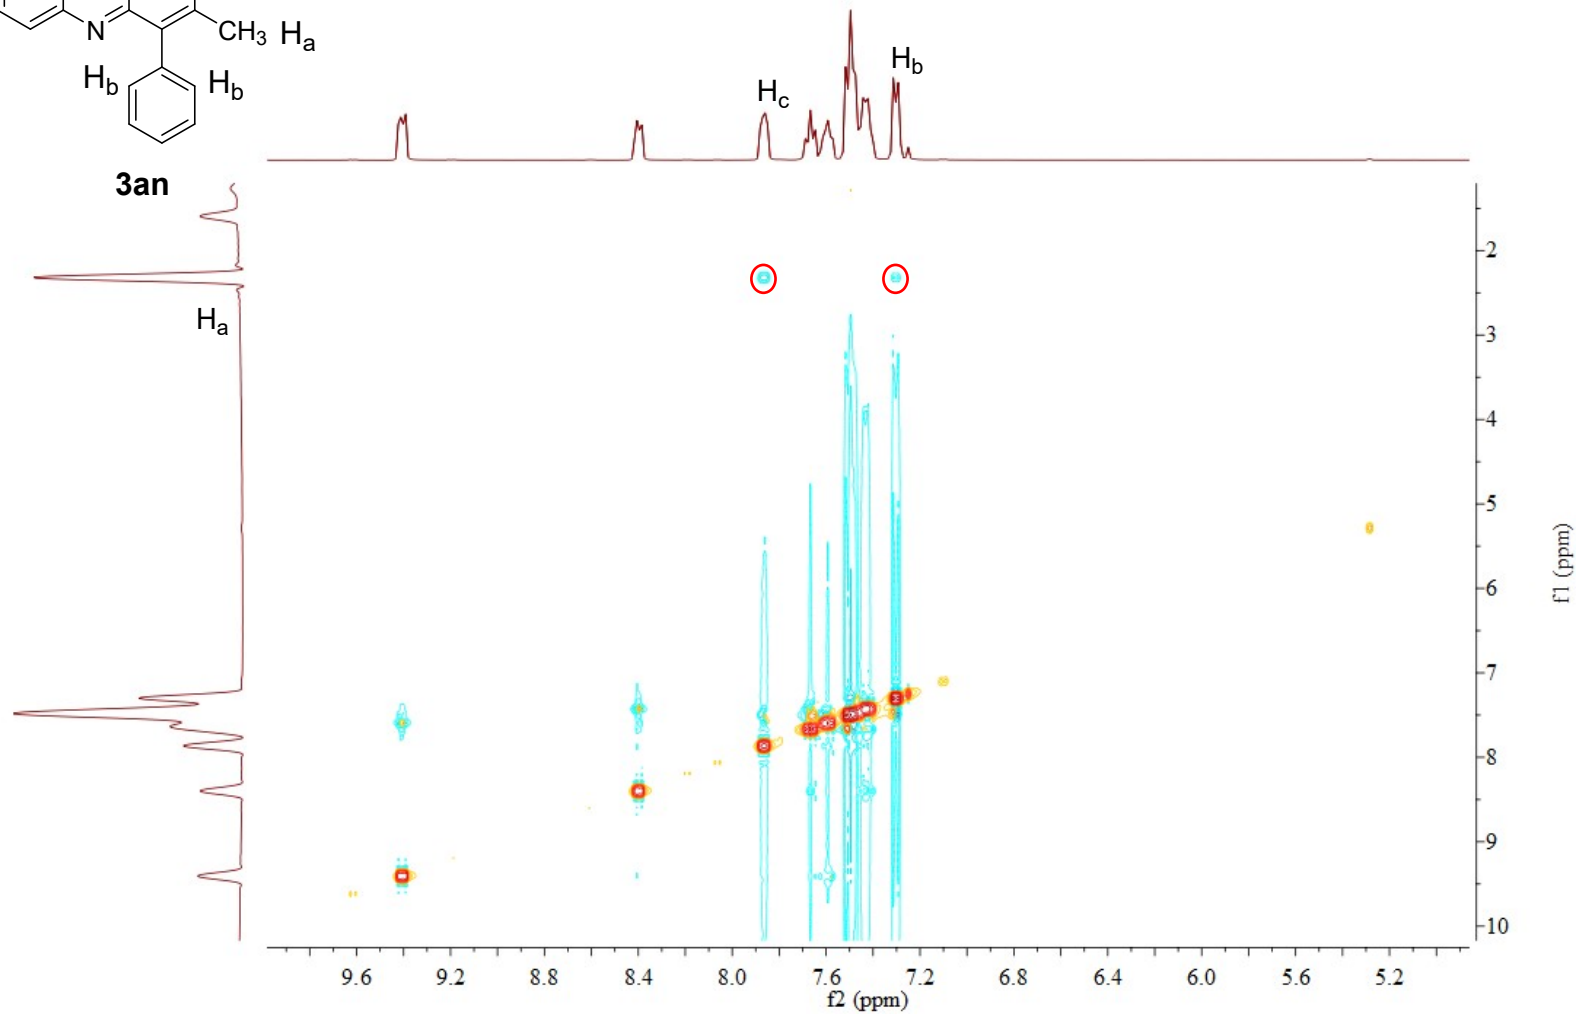

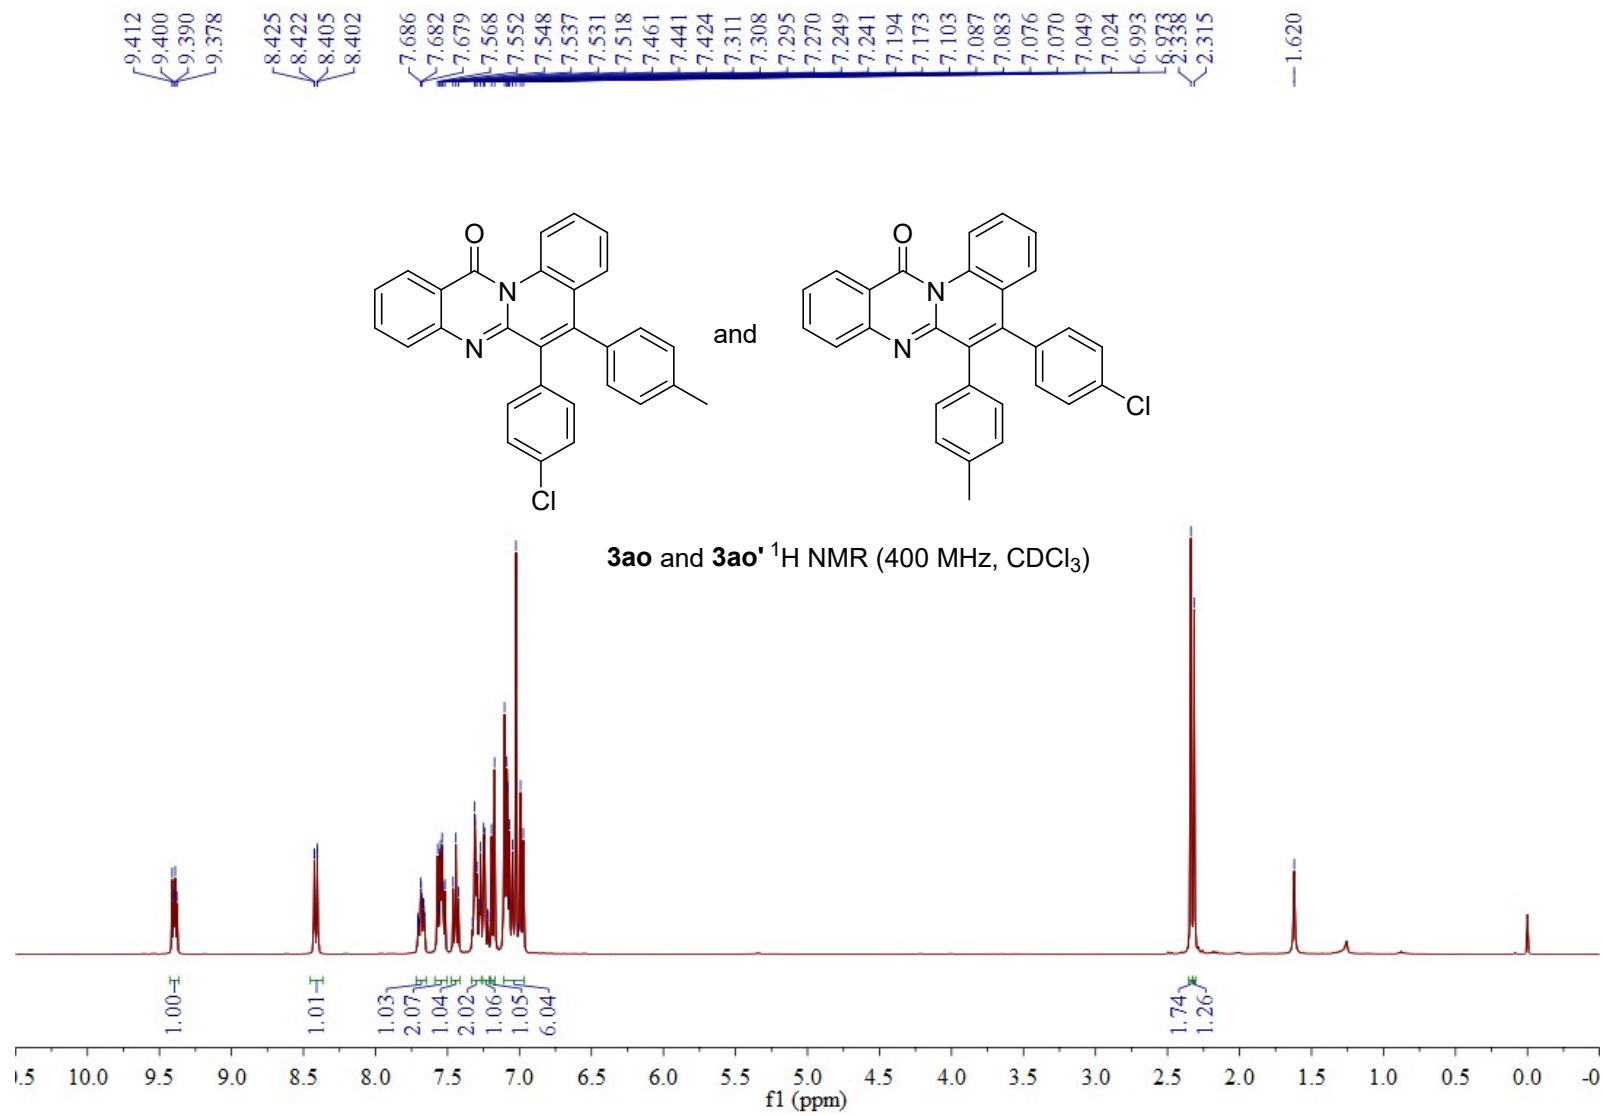

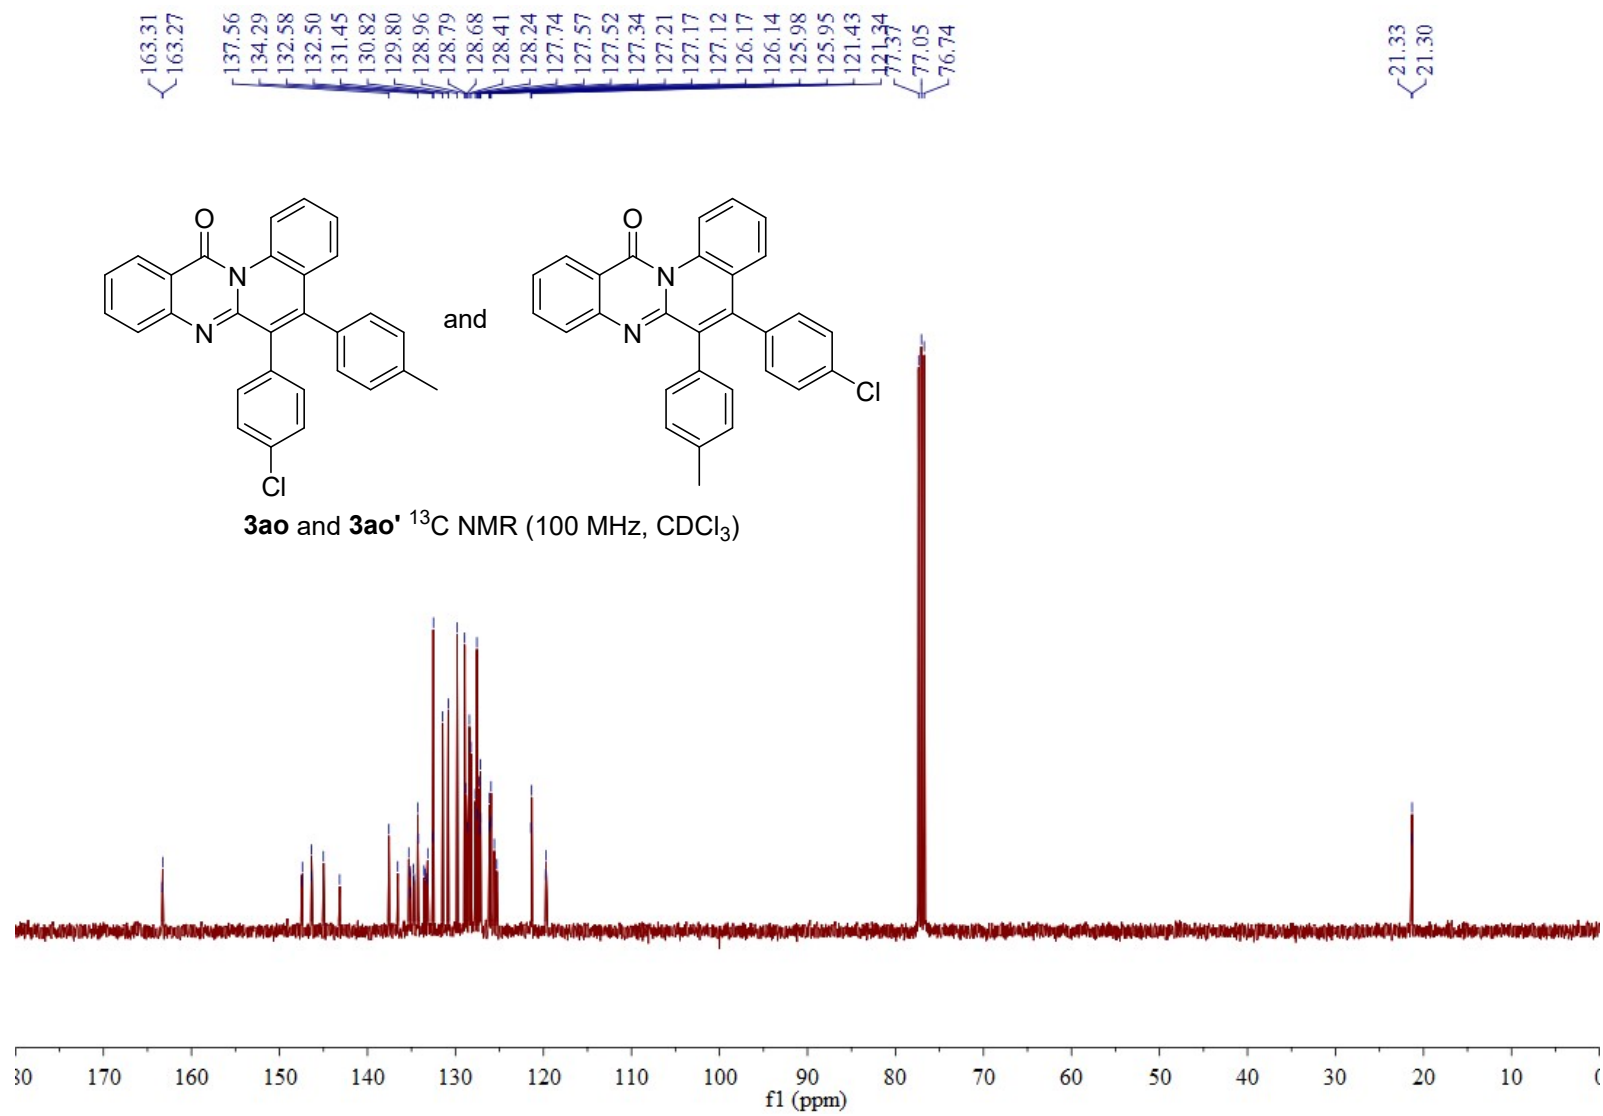

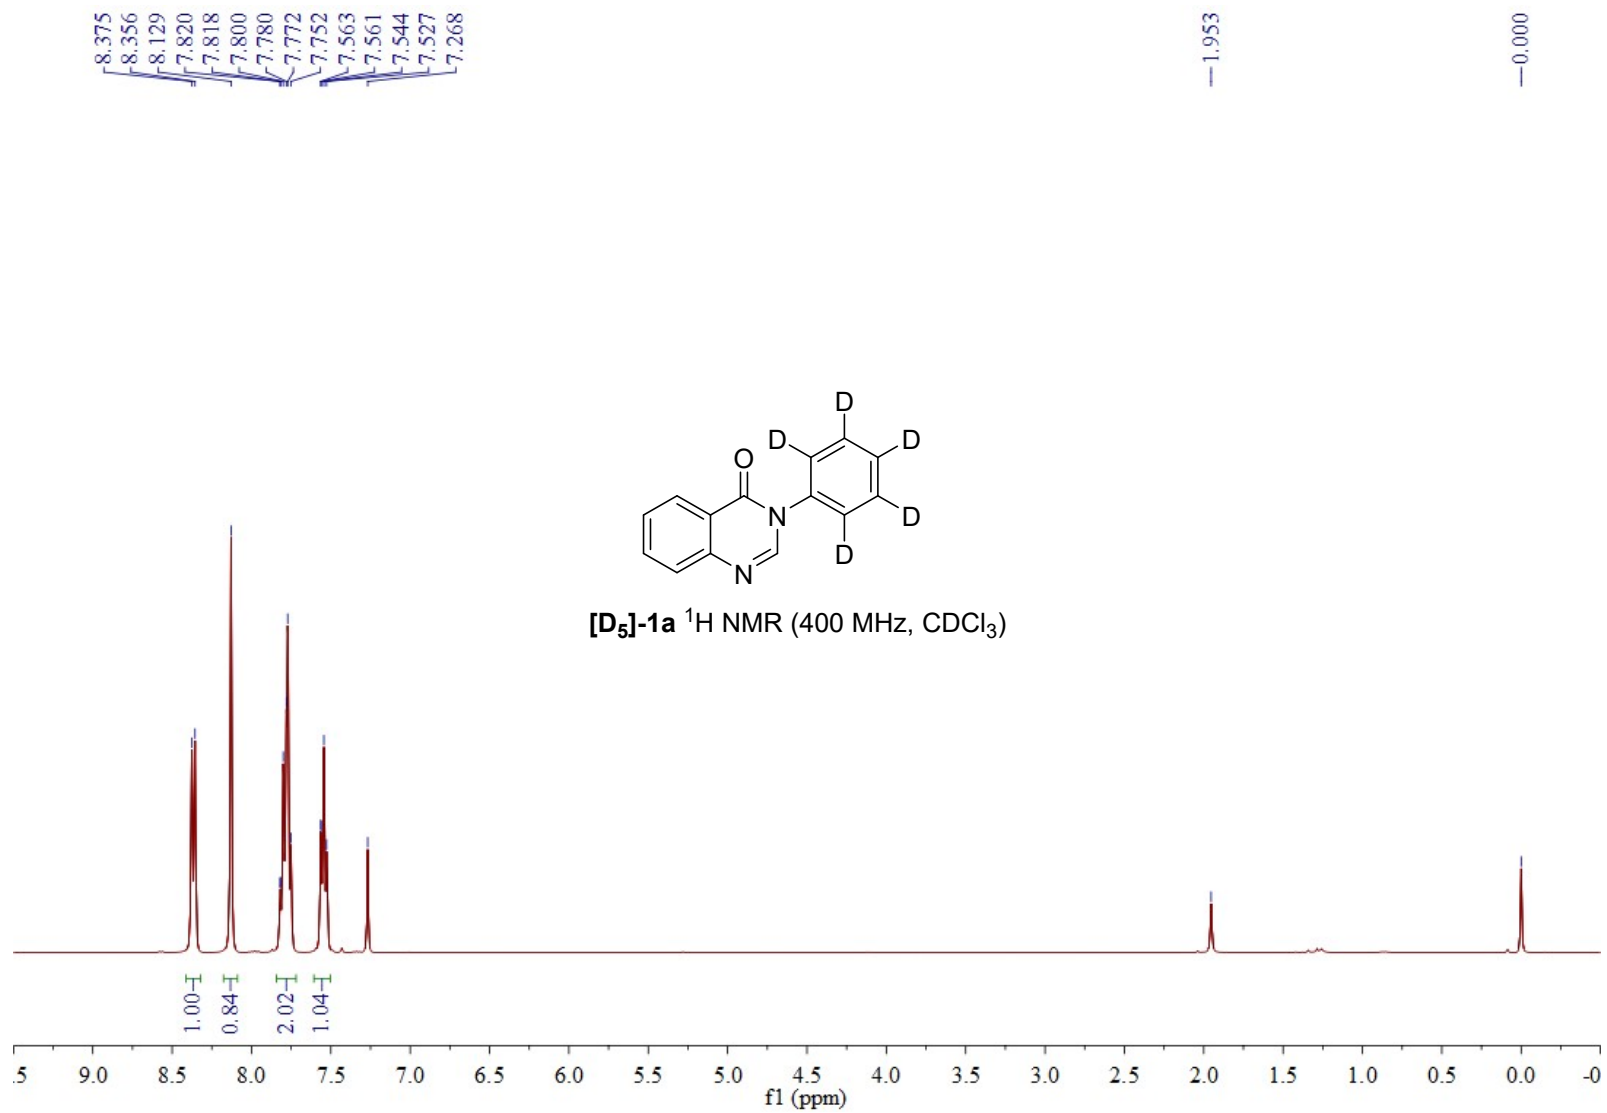

—160.75  
~147.91  
~146.12  
—137.39  
—134.58  
~127.65  
~127.61  
~127.19  
~122.41  
77.41  
77.09  
76.78

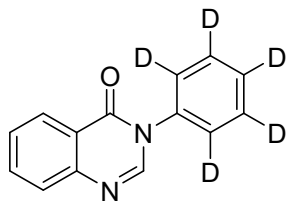

[D<sub>5</sub>]-1a <sup>13</sup>C NMR (100 MHz, CDCl<sub>3</sub>)

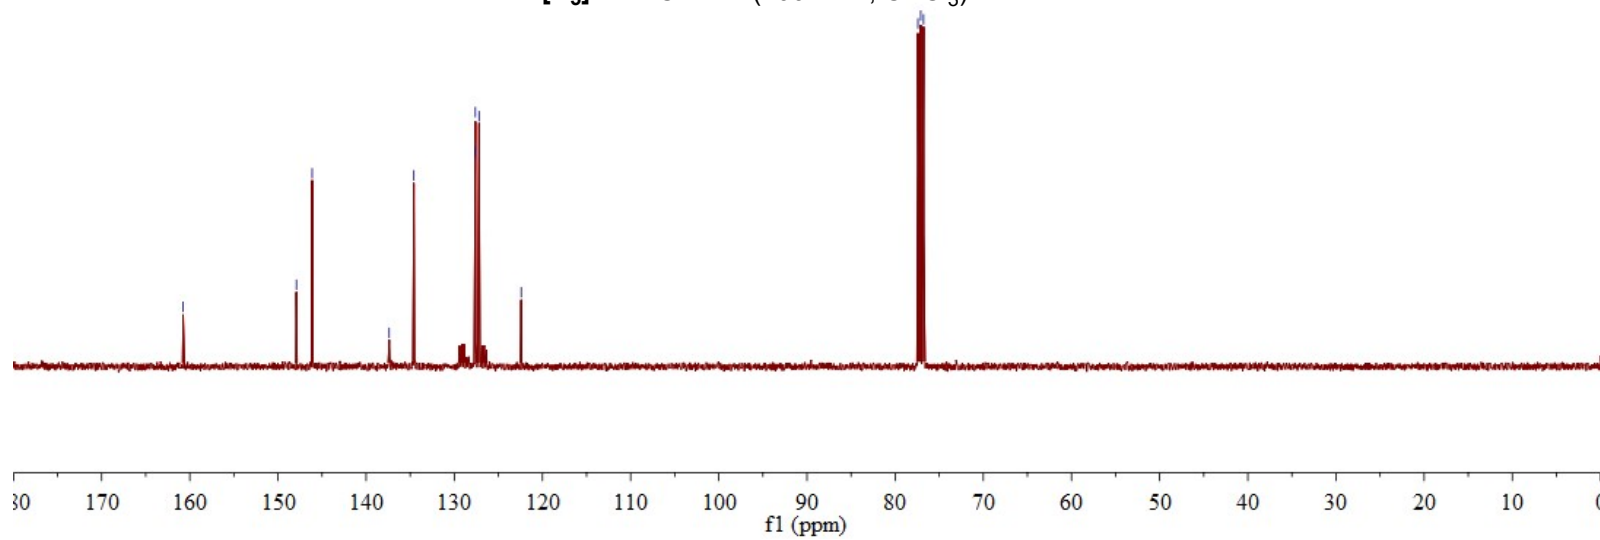

## VIII. UV-Vis and emission spectrum

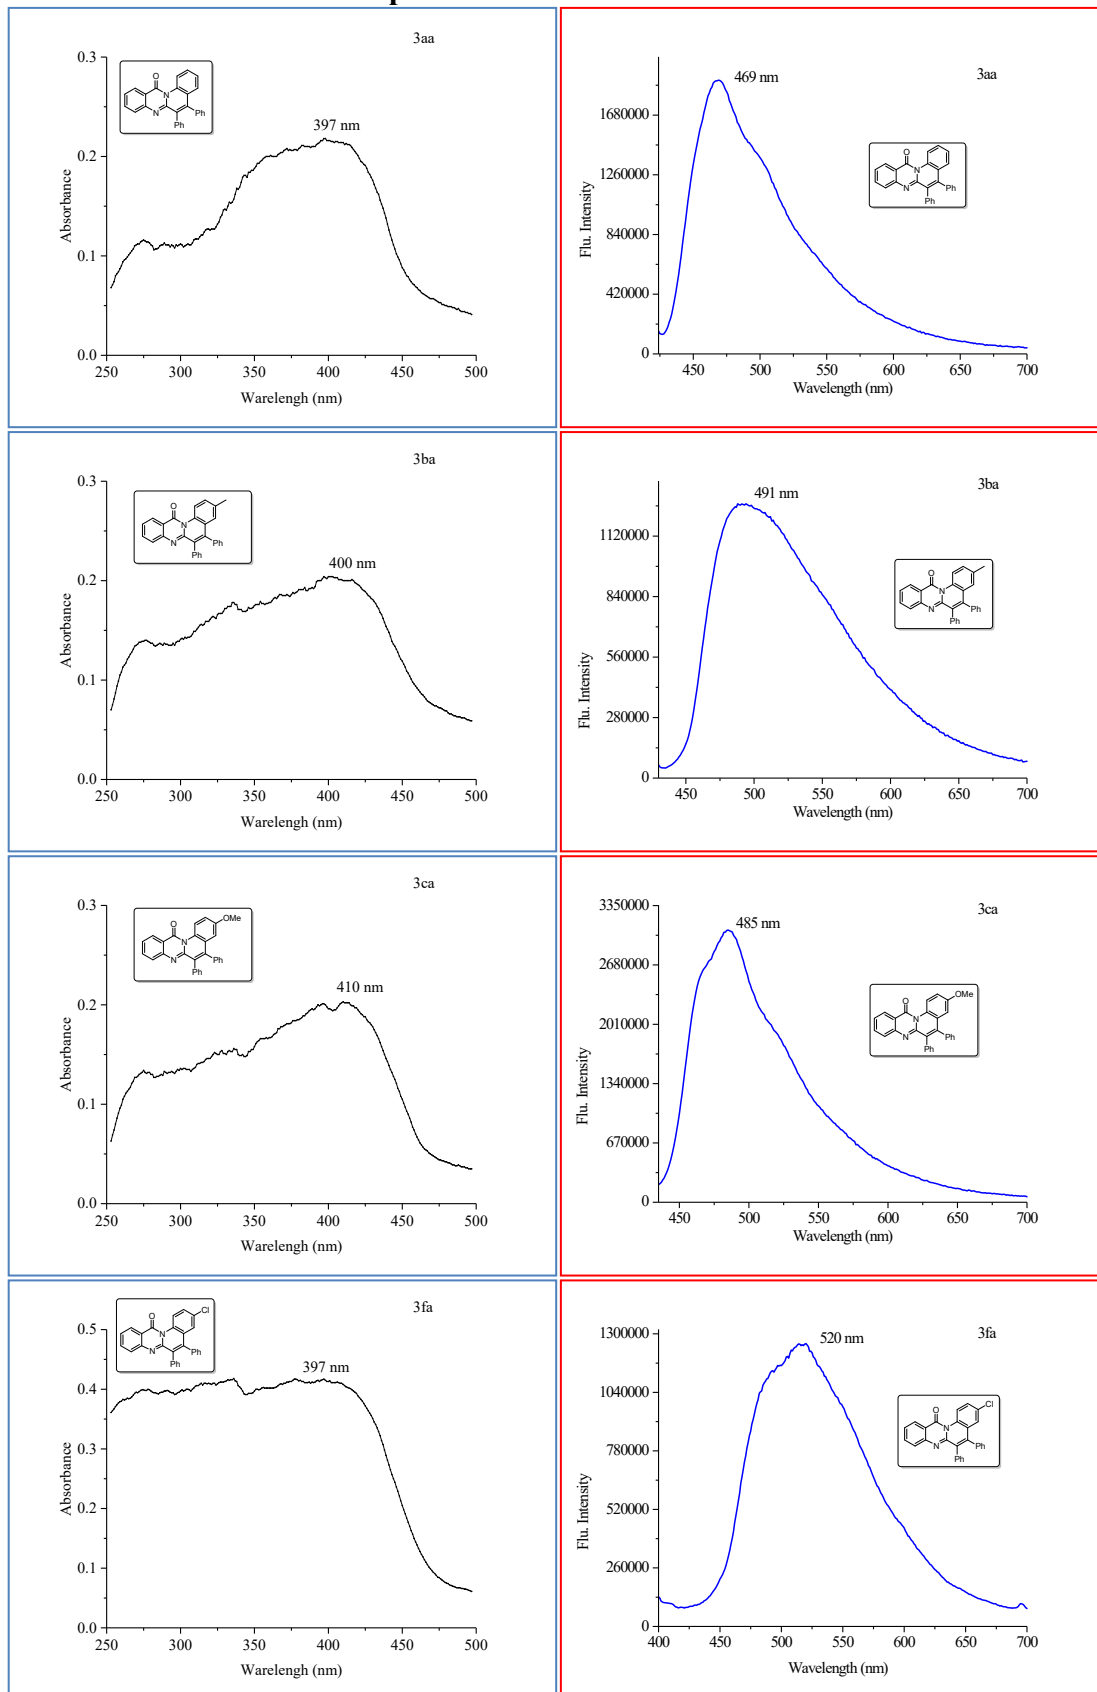

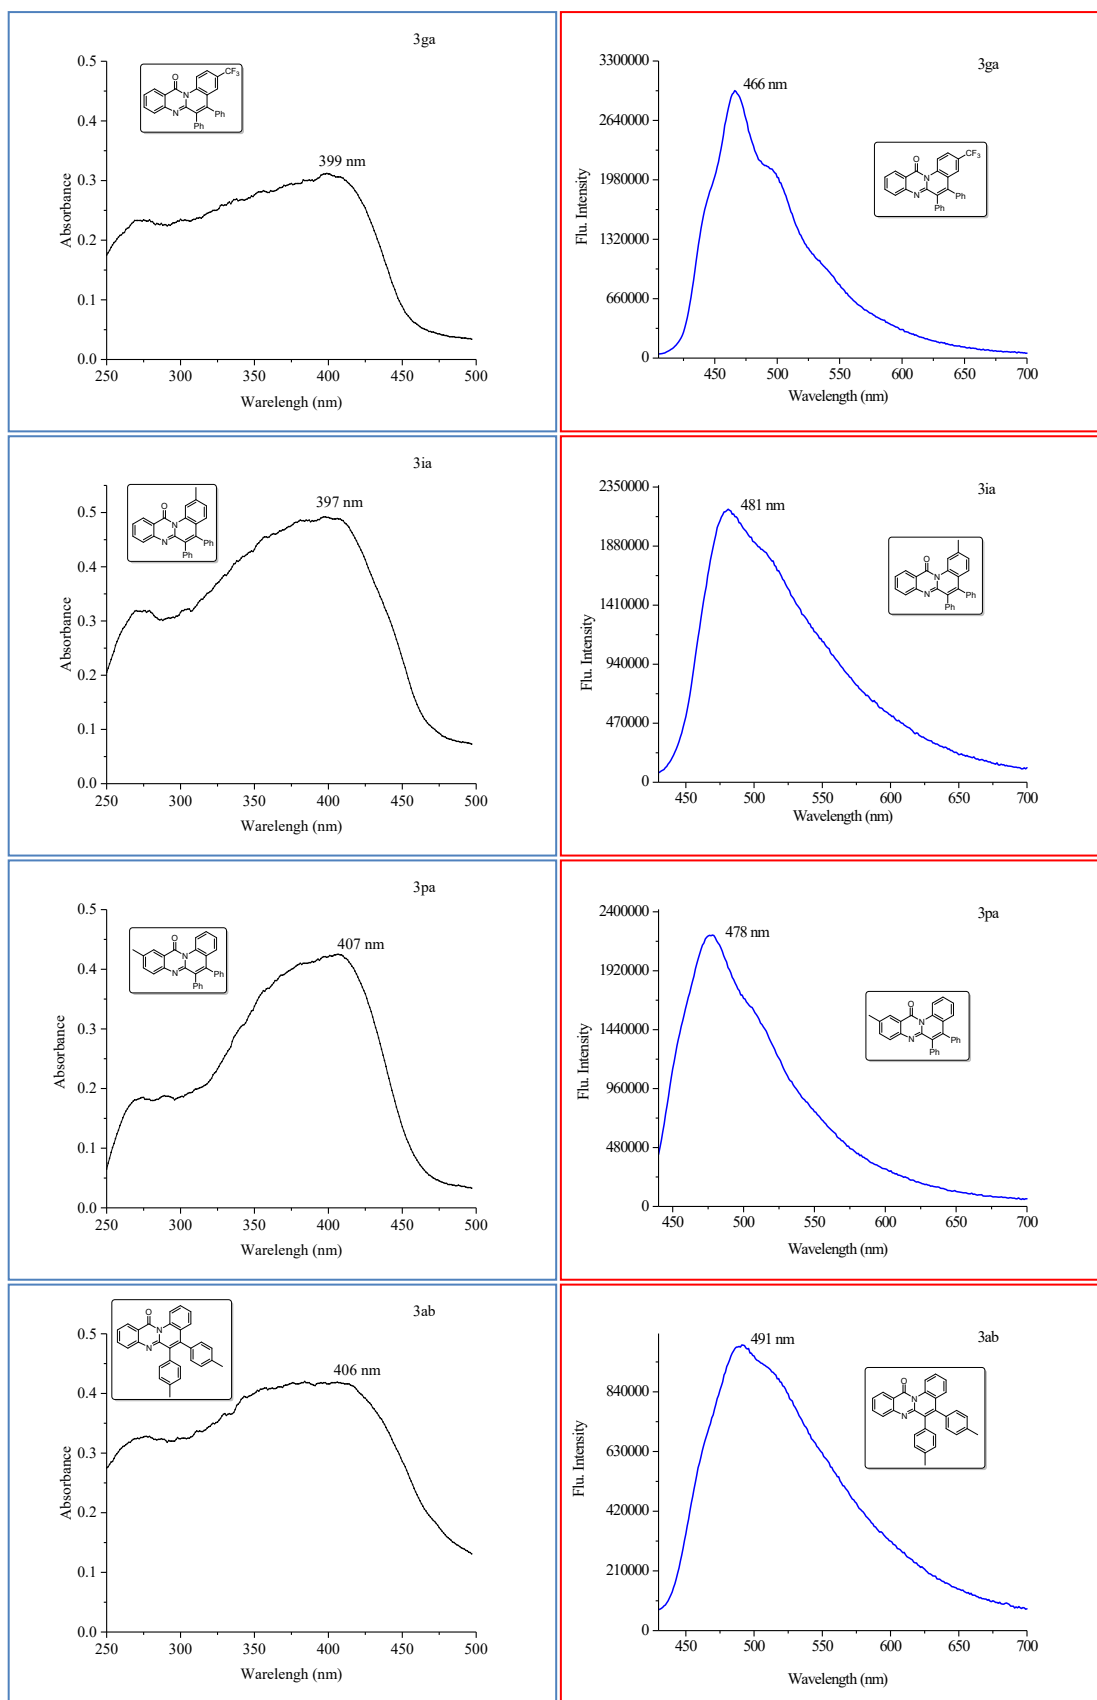

Supplement: d1qo01186c1.pdf [file d1qo01186c1.pdf]
