# Supplementary figures and images for: Rhodium(iii)-catalyzed annulation of 3-arylquinazolinones with alkynes via double C–H activation: an efficient route for quinolino[2,1-b]quinazolinones
Source: Royal Society of Chemistry journal article supplement (doi:10.1039/d1qo01186c), 2021-01-01

3ia

3ia  
3ia 142 (2.775)

1: TOF MS ES+  
5.23e6

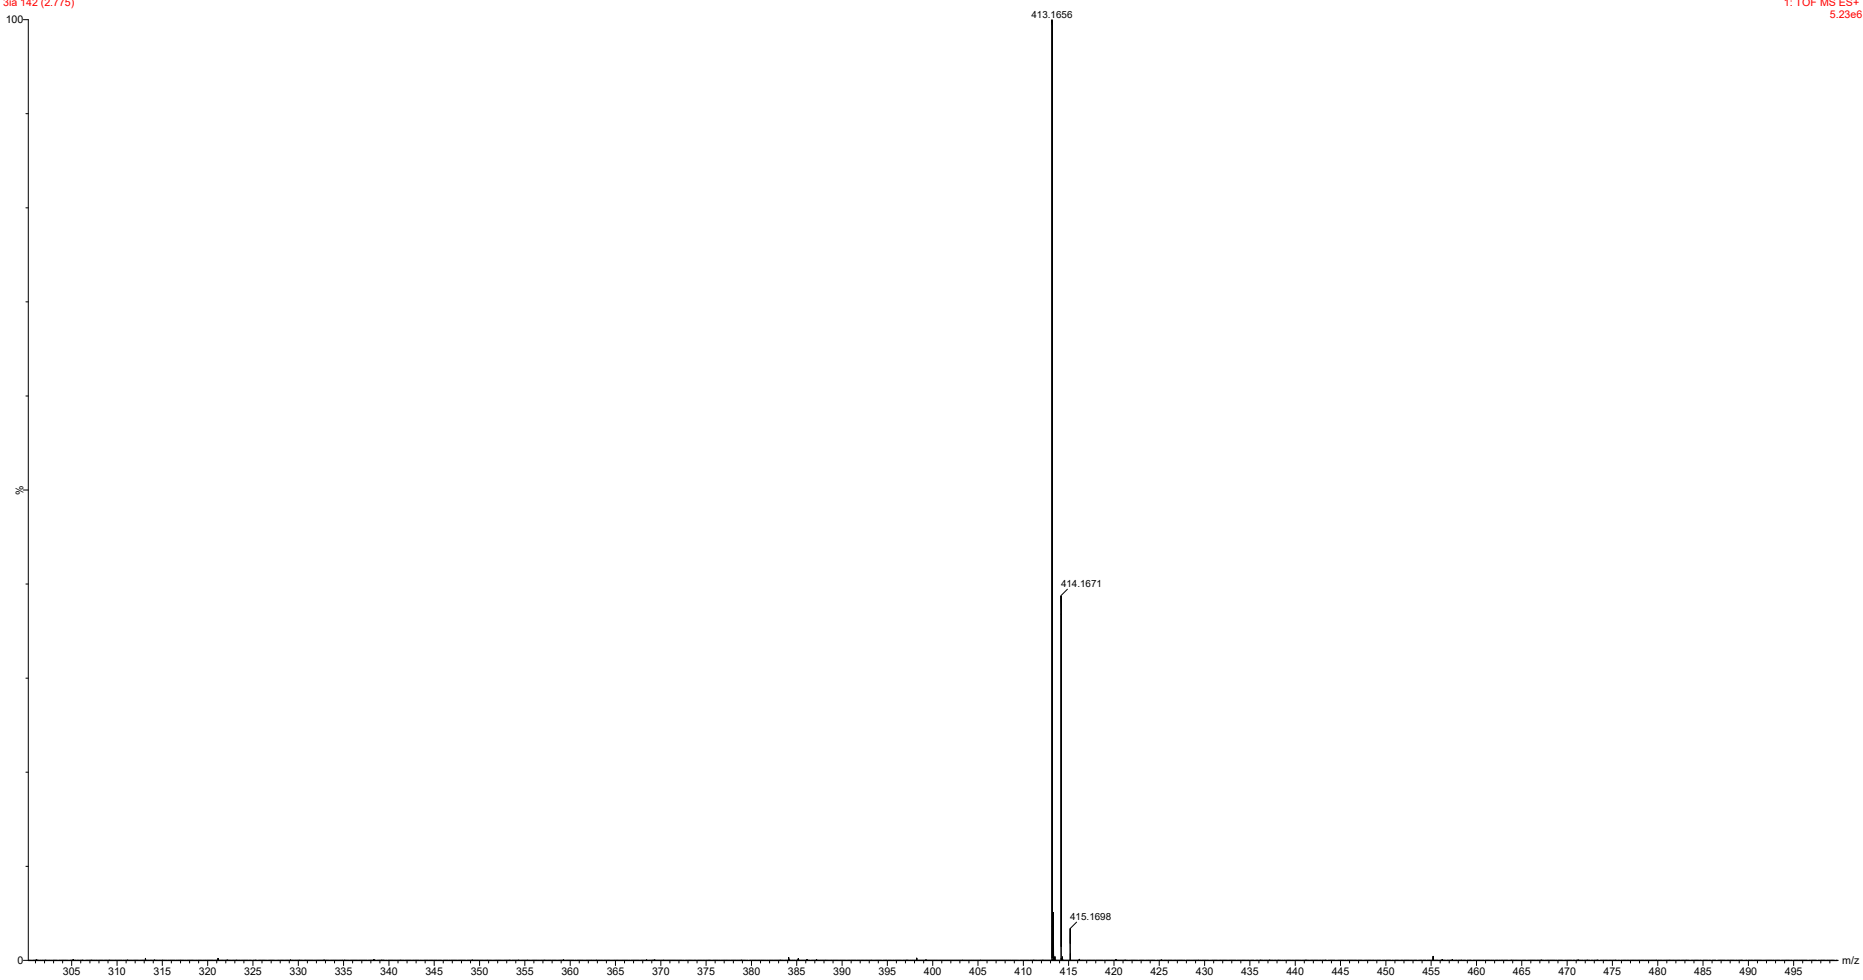

30a

30a 133 (2.603)

1: TOF MS ES+  
4.43e6

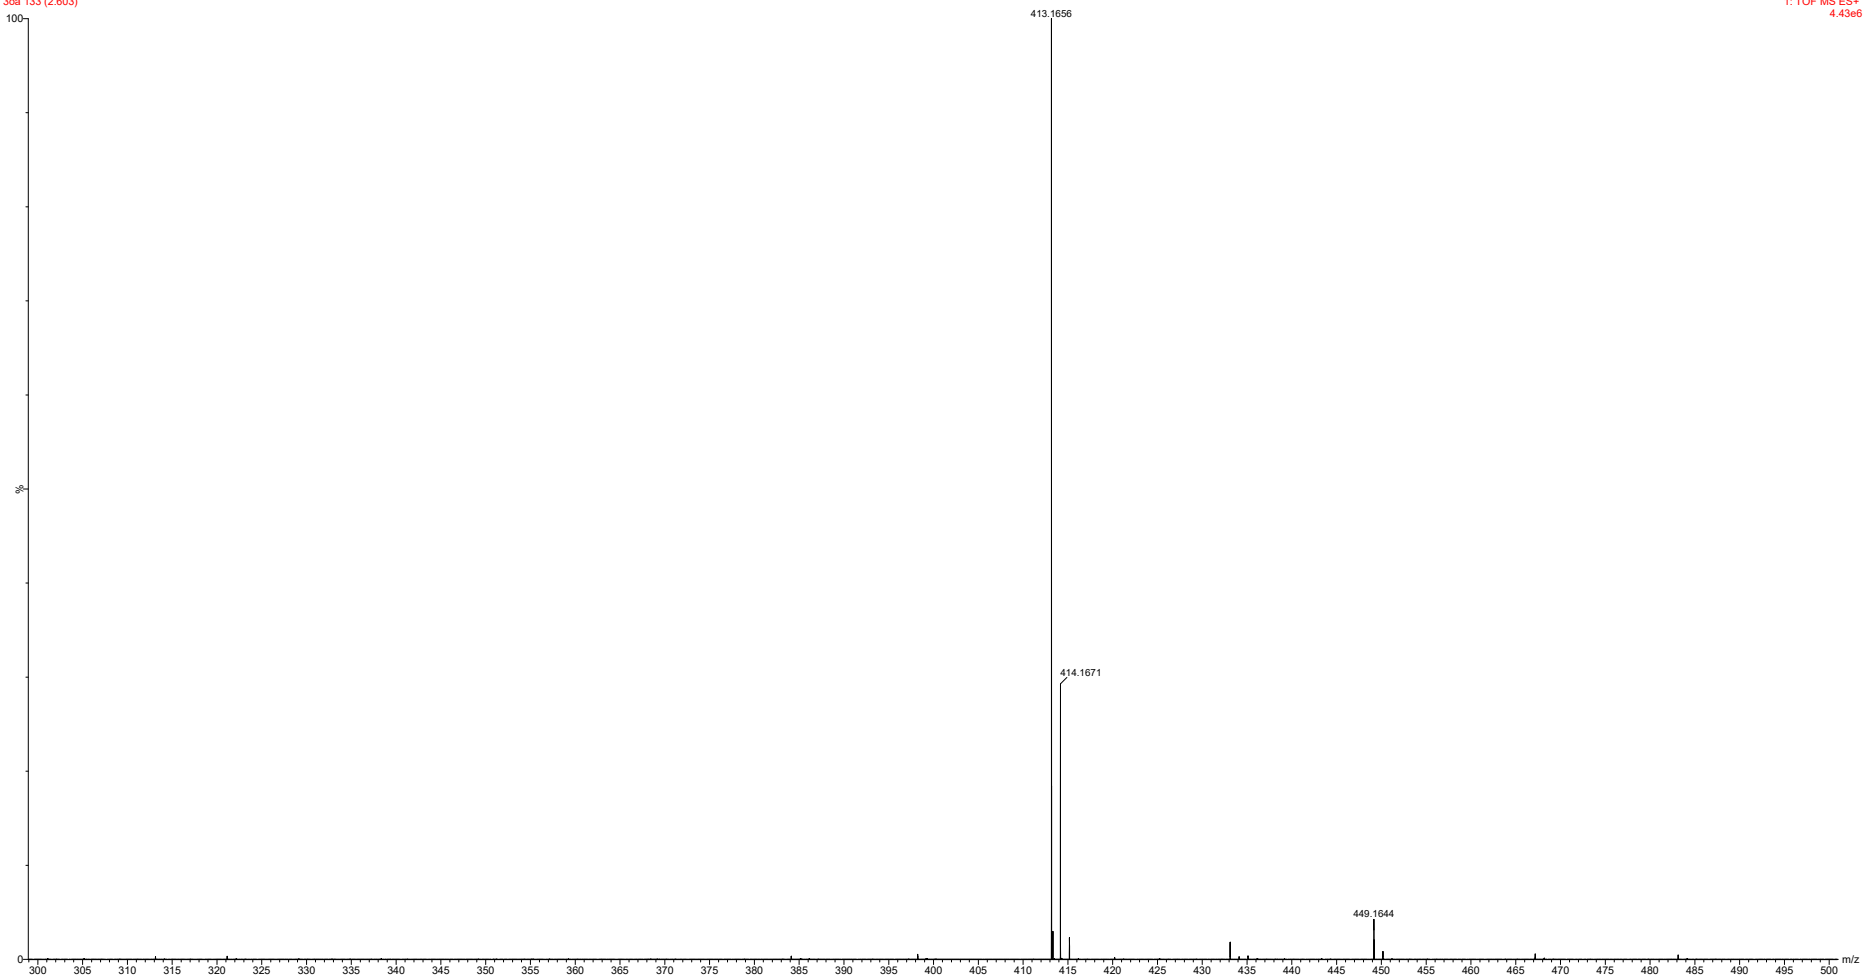

3pa

3pa 153 (3.000)

1: TOF MS ES+  
5.15e6

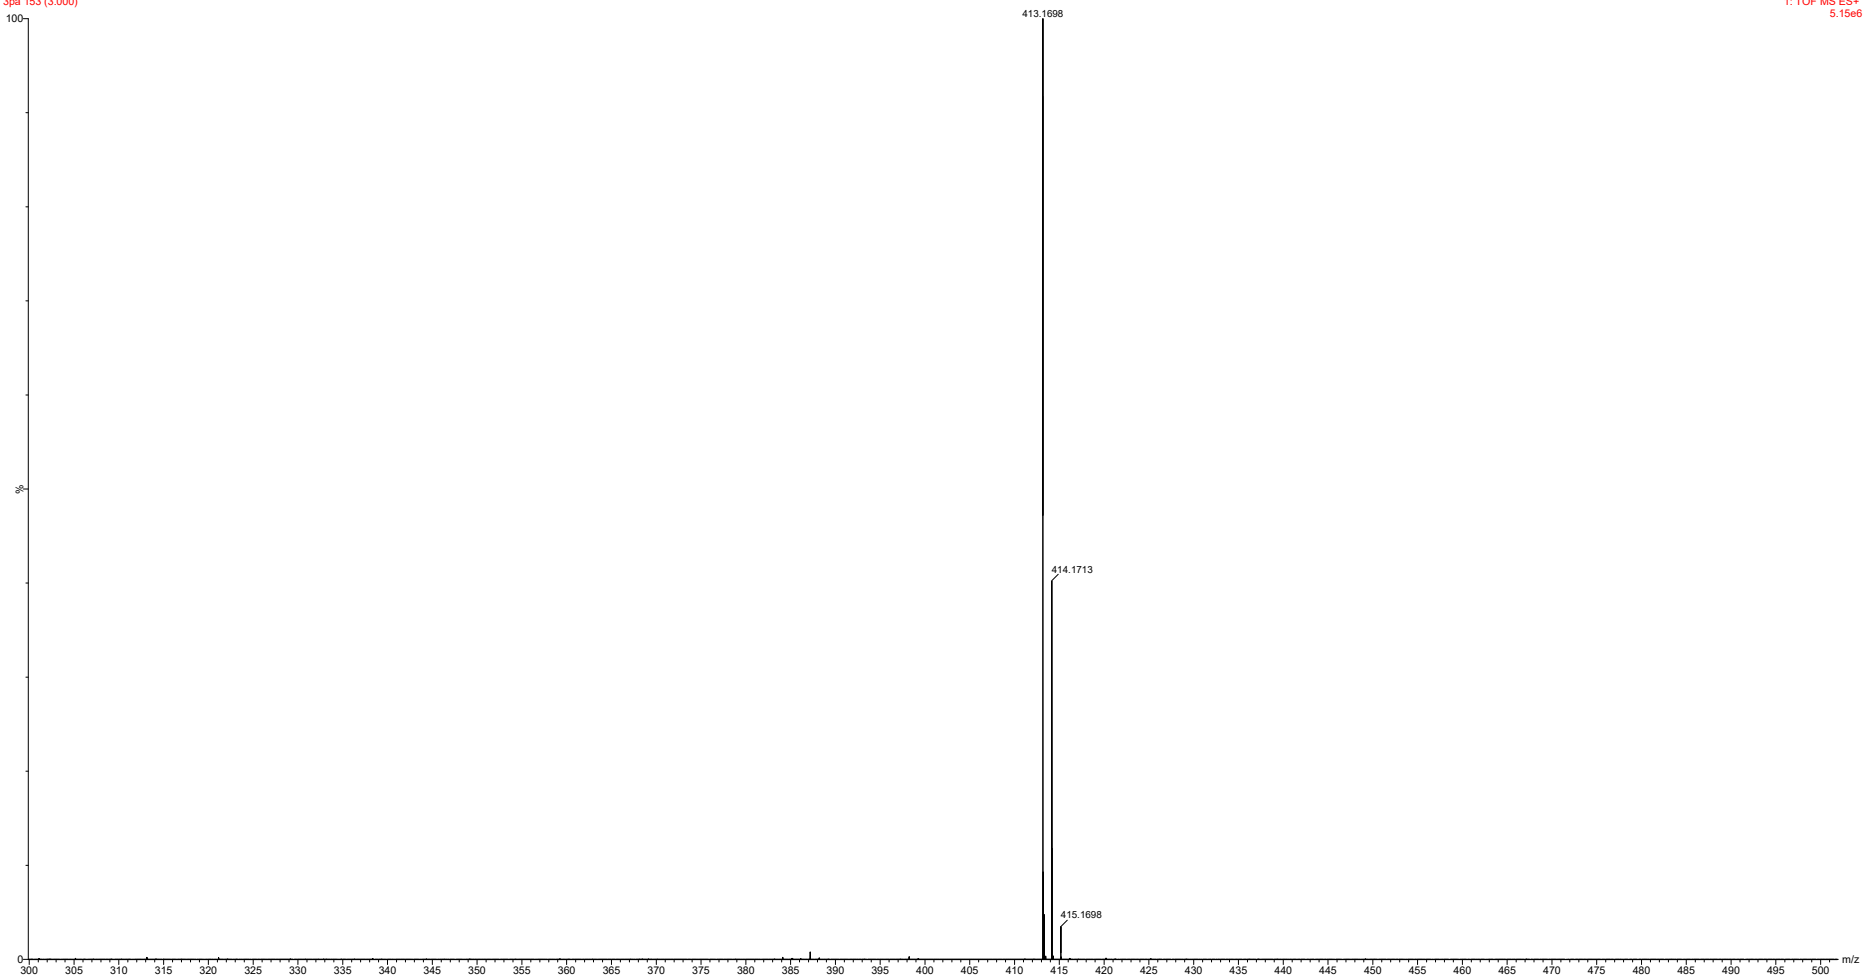

3qa

3qa  
3qa 145 (2.845)

1: TOF MS ES+  
5.10e6

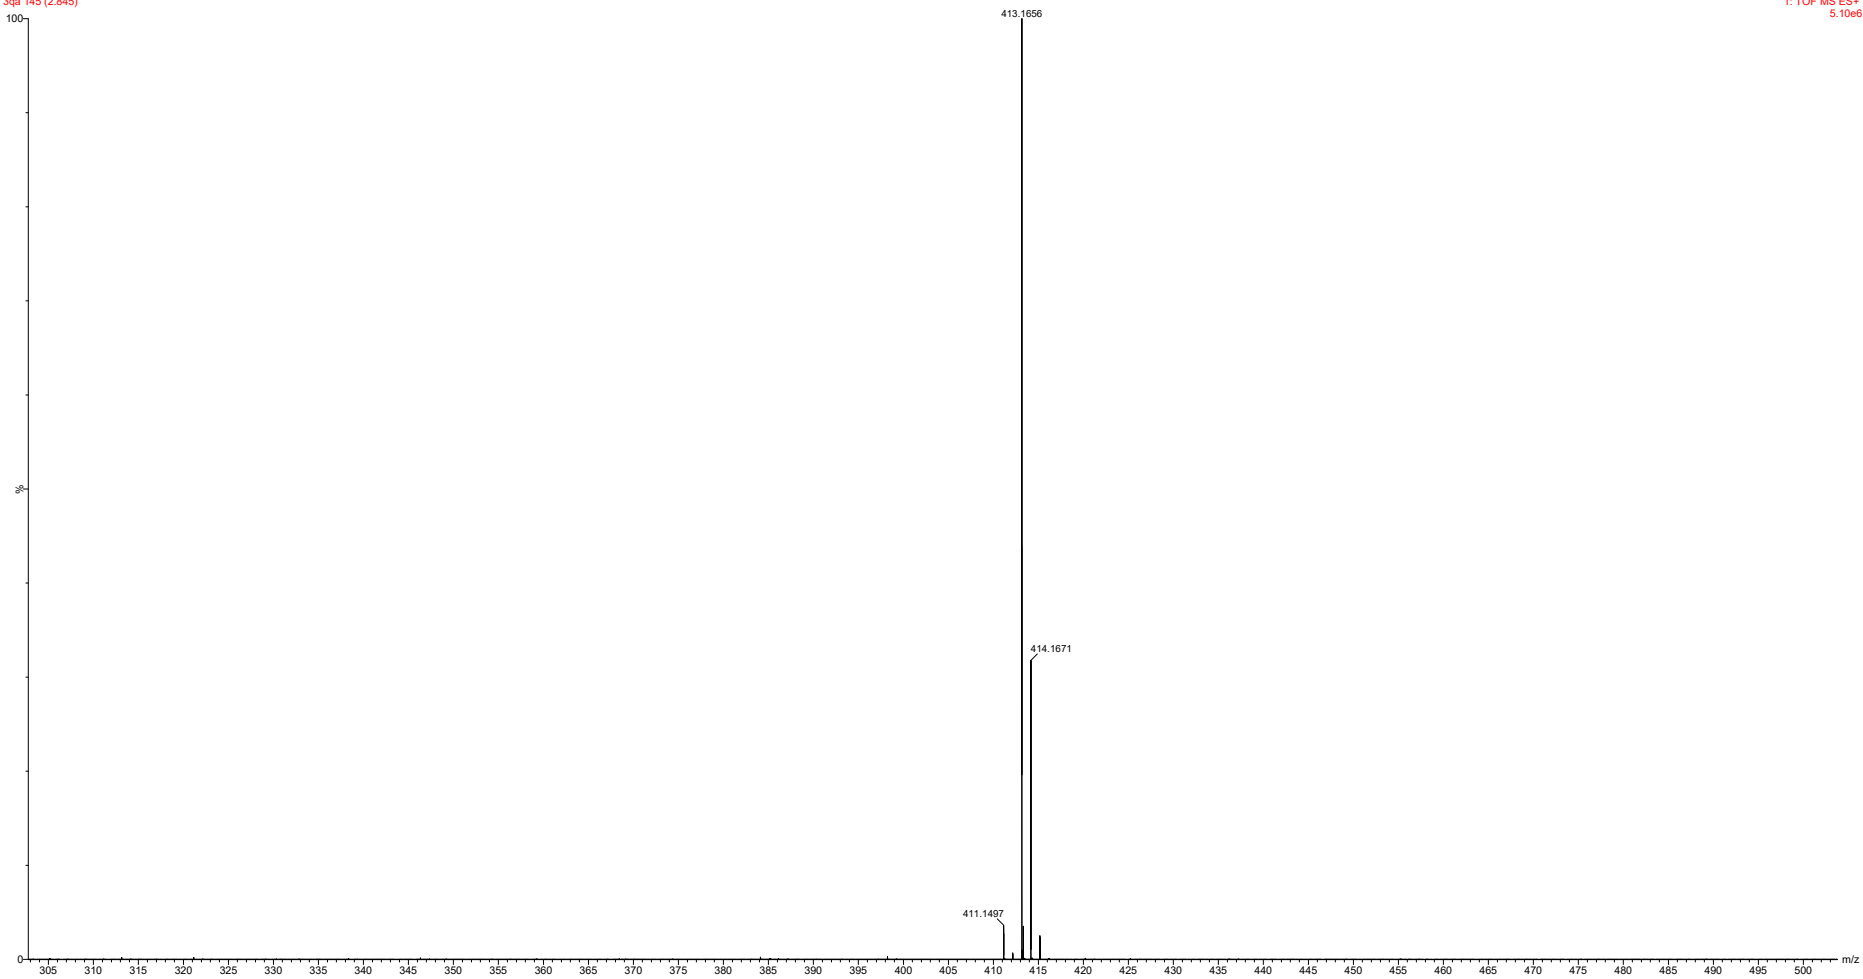

3ra

3ra  
3ra 145 (2.845)

1: TOF MS ES+  
4.82e6

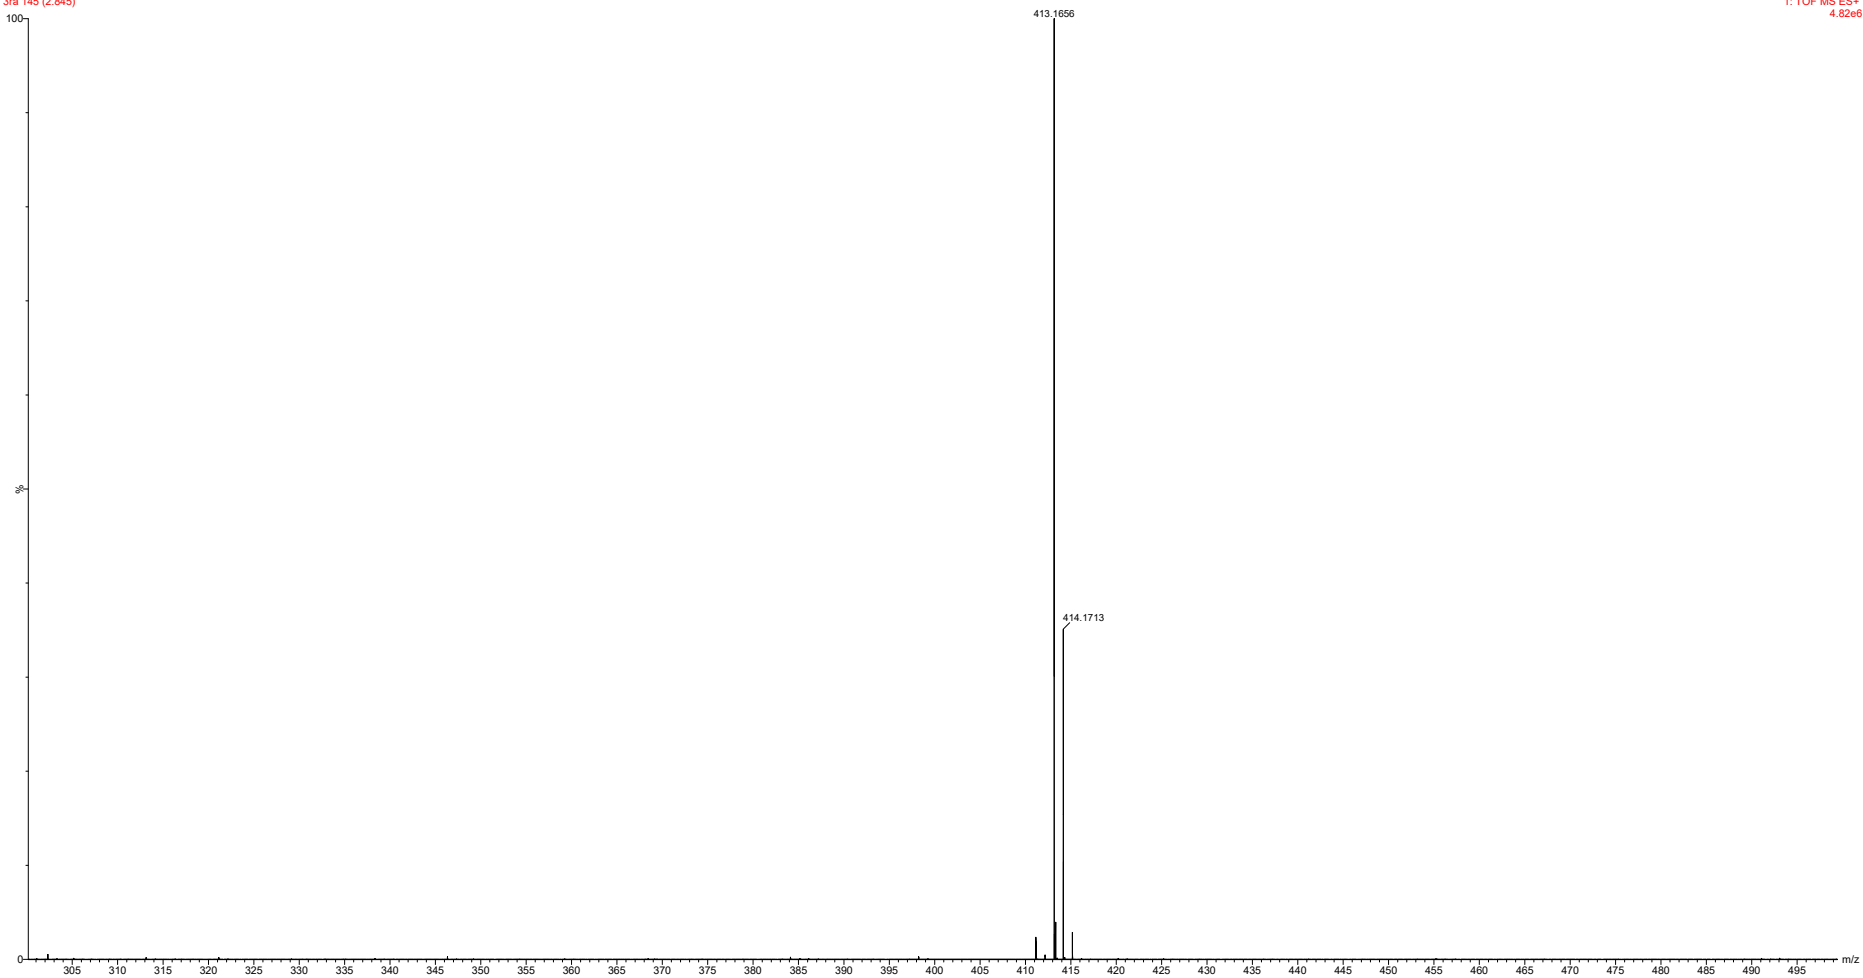

Supplement: d1qo01186c2.pdf [file d1qo01186c2.pdf]
